# Supplementary material for: Differences in molecular sampling and data processing explain variation among single-cell and single-nucleus RNA-seq experiments
Source: HighWire-hosted journal article supplement (doi:10.1101/gr.278253.123), 2024-02-01
Supplement: Supplemental_Table_S1.xlsx [file Supplemental_Table_S1.xlsx]

## Sheet: Supplemental_Table_S1
category,over_represented_pvalue,under_represented_pvalue,numDEInCat,numInCat,term,ontology,mode,quant
GO:0008380,2.62020564331607e-21,1,48,355,RNA splicing,BP,hypergeometric,exon
GO:0006397,5.25411662837321e-19,1,49,419,mRNA processing,BP,hypergeometric,exon
GO:0016071,1.31198741047681e-18,1,58,593,mRNA metabolic process,BP,hypergeometric,exon
GO:0000375,1.38176493433513e-16,1,35,244,"RNA splicing, via transesterification reactions",BP,hypergeometric,exon
GO:0000377,1.38176493433513e-16,1,35,244,"RNA splicing, via transesterification reactions with bulged adenosine as nucleophile",BP,hypergeometric,exon
GO:0000398,1.38176493433513e-16,1,35,244,"mRNA splicing, via spliceosome",BP,hypergeometric,exon
GO:0006396,6.68633789711074e-16,1,64,807,RNA processing,BP,hypergeometric,exon
GO:0003723,1.32603039046335e-15,1,72,1001,RNA binding,MF,hypergeometric,exon
GO:0043484,3.94308553126577e-12,0.999999999999522,22,133,regulation of RNA splicing,BP,hypergeometric,exon
GO:0005681,9.42071897828036e-12,0.999999999998579,25,182,spliceosomal complex,CC,hypergeometric,exon
GO:0048024,1.57908408278863e-10,0.999999999983502,17,91,"regulation of mRNA splicing, via spliceosome",BP,hypergeometric,exon
GO:0050684,8.07493806500874e-10,0.999999999888676,19,128,regulation of mRNA processing,BP,hypergeometric,exon
GO:0003729,8.9777637884422e-10,0.999999999807562,28,278,mRNA binding,MF,hypergeometric,exon
GO:0016604,1.24914815762383e-09,0.999999999607366,45,642,nuclear body,CC,hypergeometric,exon
GO:1903311,1.00235314212839e-08,0.999999997811401,25,252,regulation of mRNA metabolic process,BP,hypergeometric,exon
GO:0016607,3.11913812472917e-08,0.999999992251347,27,306,nuclear speck,CC,hypergeometric,exon
GO:1990904,2.31387104407734e-07,0.999999917291462,40,638,ribonucleoprotein complex,CC,hypergeometric,exon
GO:0016070,2.94598099227892e-07,0.999999839425858,125,3196,RNA metabolic process,BP,hypergeometric,exon
GO:0010467,0.0000026956233274969,0.999998408438359,151,4229,gene expression,BP,hypergeometric,exon
GO:0031981,0.00000596804884449397,0.999996514602876,123,3308,nuclear lumen,CC,hypergeometric,exon
GO:0000381,0.00000798543085106603,0.999999094478461,9,53,"regulation of alternative mRNA splicing, via spliceosome",BP,hypergeometric,exon
GO:0000380,0.00000833209788134793,0.999998890448552,10,67,"alternative mRNA splicing, via spliceosome",BP,hypergeometric,exon
GO:0140513,0.00000987931201097657,0.999995360481189,52,1076,nuclear protein-containing complex,CC,hypergeometric,exon
GO:0090304,0.0000111685390004663,0.99999330619979,131,3625,nucleic acid metabolic process,BP,hypergeometric,exon
GO:0051965,0.0000141451593496605,0.999997985634402,10,71,positive regulation of synapse assembly,BP,hypergeometric,exon
GO:0048026,0.0000156127597300247,0.999999071784932,6,22,"positive regulation of mRNA splicing, via spliceosome",BP,hypergeometric,exon
GO:0005654,0.0000172424167038811,0.999989832141702,111,2969,nucleoplasm,CC,hypergeometric,exon
GO:0000245,0.0000213894048115731,0.999997668907451,8,46,spliceosomal complex assembly,BP,hypergeometric,exon
GO:0051963,0.0000215979208789084,0.99999596876759,12,107,regulation of synapse assembly,BP,hypergeometric,exon
GO:0071004,0.0000281038219766002,0.999998777665149,5,15,U2-type prespliceosome,CC,hypergeometric,exon
GO:0071010,0.0000281038219766002,0.999998777665149,5,15,prespliceosome,CC,hypergeometric,exon
GO:0031974,0.0000531311815190756,0.999966898155913,129,3667,membrane-enclosed lumen,CC,hypergeometric,exon
GO:0043233,0.0000531311815190756,0.999966898155913,129,3667,organelle lumen,CC,hypergeometric,exon
GO:0070013,0.0000531311815190756,0.999966898155913,129,3667,intracellular organelle lumen,CC,hypergeometric,exon
GO:0033120,0.0000571736498108365,0.999994088029976,7,39,positive regulation of RNA splicing,BP,hypergeometric,exon
GO:0050807,0.0000645664417131495,0.999980788239778,18,242,regulation of synapse organization,BP,hypergeometric,exon
GO:1901890,0.0000746732848038492,0.999985374478359,11,103,positive regulation of cell junction assembly,BP,hypergeometric,exon
GO:0071013,0.0000767745374869765,0.999986417491352,10,86,catalytic step 2 spliceosome,CC,hypergeometric,exon
GO:0050803,0.0000840258240291784,0.999974447069697,18,247,regulation of synapse structure or activity,BP,hypergeometric,exon
GO:0050808,0.0000881870811382465,0.999966214082845,26,440,synapse organization,BP,hypergeometric,exon
GO:0007416,0.000144337800789805,0.999961920433709,14,170,synapse assembly,BP,hypergeometric,exon
GO:0006139,0.000160919031105686,0.999896006453568,135,3966,nucleobase-containing compound metabolic process,BP,hypergeometric,exon
GO:0050685,0.000181963828158669,0.99998183708964,6,33,positive regulation of mRNA processing,BP,hypergeometric,exon
GO:0099054,0.00025542446839023,0.999965462853757,7,49,presynapse assembly,BP,hypergeometric,exon
GO:0034330,0.000331402120083576,0.999847828436327,32,642,cell junction organization,BP,hypergeometric,exon
GO:1901888,0.000347583528445583,0.999899653266279,14,185,regulation of cell junction assembly,BP,hypergeometric,exon
GO:0006725,0.000367277789260167,0.999756501997409,137,4108,cellular aromatic compound metabolic process,BP,hypergeometric,exon
GO:0034329,0.000412250865605703,0.999842947577426,21,355,cell junction assembly,BP,hypergeometric,exon
GO:0005488,0.000461096567614236,0.999701970803321,280,9648,binding,MF,hypergeometric,exon
GO:0046483,0.000463591315646976,0.99969098434592,135,4057,heterocycle metabolic process,BP,hypergeometric,exon
GO:0140058,0.000486300090819015,0.999955887095655,5,26,neuron projection arborization,BP,hypergeometric,exon
GO:0006376,0.000584213192163711,0.999944517555098,5,27,mRNA splice site selection,BP,hypergeometric,exon
GO:0099172,0.000590137881726018,0.999907158087327,7,56,presynapse organization,BP,hypergeometric,exon
GO:0003676,0.00064119971953197,0.999590867207078,92,2579,nucleic acid binding,MF,hypergeometric,exon
GO:0097525,0.000657975295979859,0.99989441507723,7,57,spliceosomal snRNP complex,CC,hypergeometric,exon
GO:0002940,0.000675198952512184,1,2,2,tRNA N2-guanine methylation,BP,hypergeometric,exon
GO:1903313,0.000675711505051044,0.999840448886451,10,112,positive regulation of mRNA metabolic process,BP,hypergeometric,exon
GO:1901363,0.000725994338900144,0.999509014669656,136,4134,heterocyclic compound binding,MF,hypergeometric,exon
GO:0034641,0.000938238087541717,0.999355498414675,148,4594,cellular nitrogen compound metabolic process,BP,hypergeometric,exon
GO:0005685,0.00103305934926577,0.999924821535799,4,18,U1 snRNP,CC,hypergeometric,exon
GO:0010468,0.00114950590035154,0.999228632630231,112,3321,regulation of gene expression,BP,hypergeometric,exon
GO:0097159,0.00116326089287839,0.999201529974475,136,4179,organic cyclic compound binding,MF,hypergeometric,exon
GO:0097539,0.00130591779157008,0.999948773754213,3,9,ciliary transition fiber,CC,hypergeometric,exon
GO:0019219,0.00133657472961774,0.999119482283144,95,2741,regulation of nucleobase-containing compound metabolic process,BP,hypergeometric,exon
GO:0030532,0.00145093498681097,0.999730792278721,7,65,small nuclear ribonucleoprotein complex,CC,hypergeometric,exon
GO:1901360,0.00148000708830188,0.998975486742404,137,4239,organic cyclic compound metabolic process,BP,hypergeometric,exon
GO:0099173,0.00156646162850606,0.999494095896608,13,192,postsynapse organization,BP,hypergeometric,exon
GO:0099560,0.00173472602538095,0.999783836427913,5,34,synaptic membrane adhesion,BP,hypergeometric,exon
GO:0051252,0.00182369130349026,0.998799159142821,88,2526,regulation of RNA metabolic process,BP,hypergeometric,exon
GO:0035631,0.00182975710687794,0.999916373944148,3,10,CD40 receptor complex,CC,hypergeometric,exon
GO:0004407,0.00189978279147627,0.999832578107788,4,21,histone deacetylase activity,MF,hypergeometric,exon
GO:0004809,0.00199064718474822,0.999982525163606,2,3,tRNA (guanine-N2-)-methyltransferase activity,MF,hypergeometric,exon
GO:0098815,0.00199712535049927,0.999670742632673,6,51,modulation of excitatory postsynaptic potential,BP,hypergeometric,exon
GO:0005634,0.00210025944608732,0.998506718038028,174,5642,nucleus,CC,hypergeometric,exon
GO:1905606,0.00225254528139689,0.99970035948752,5,36,regulation of presynapse assembly,BP,hypergeometric,exon
GO:0033558,0.00227482971468005,0.999787928362941,4,22,protein deacetylase activity,MF,hypergeometric,exon
GO:0099240,0.00243108937280026,0.99937037424419,9,111,intrinsic component of synaptic membrane,CC,hypergeometric,exon
GO:0098945,0.00246764621990492,0.999871280527861,3,11,intrinsic component of presynaptic active zone membrane,CC,hypergeometric,exon
GO:0005684,0.0025277820248962,0.999406771470463,8,91,U2-type spliceosomal complex,CC,hypergeometric,exon
GO:0099565,0.0025277820248962,0.999406771470463,8,91,"chemical synaptic transmission, postsynaptic",BP,hypergeometric,exon
GO:0098742,0.00256837432113356,0.99921519721311,11,156,cell-cell adhesion via plasma-membrane adhesion molecules,BP,hypergeometric,exon
GO:0150011,0.00322715296619937,0.999810874018978,3,12,regulation of neuron projection arborization,BP,hypergeometric,exon
GO:0120114,0.00357336138336179,0.999214948267637,7,76,Sm-like protein family complex,CC,hypergeometric,exon
GO:0017069,0.0036120822968505,0.999459003473002,5,40,snRNA binding,MF,hypergeometric,exon
GO:0099174,0.0036120822968505,0.999459003473002,5,40,regulation of presynapse organization,BP,hypergeometric,exon
GO:0043170,0.00377214926843625,0.997262810280159,199,6659,macromolecule metabolic process,BP,hypergeometric,exon
GO:1990258,0.00391274820228754,0.999931453832791,2,4,histone glutamine methylation,BP,hypergeometric,exon
GO:0004674,0.00432358483733136,0.998079811496859,19,374,protein serine/threonine kinase activity,MF,hypergeometric,exon
GO:0010975,0.00450239864799854,0.997823513473408,23,488,regulation of neuron projection development,BP,hypergeometric,exon
GO:0048666,0.00468376950173806,0.997240010237313,42,1068,neuron development,BP,hypergeometric,exon
GO:0099699,0.00480829608310424,0.998740201798017,8,101,integral component of synaptic membrane,CC,hypergeometric,exon
GO:0005689,0.00492729076399075,0.999415786807836,4,27,U12-type spliceosomal complex,CC,hypergeometric,exon
GO:0060079,0.00509117024766174,0.998803107728385,7,81,excitatory postsynaptic potential,BP,hypergeometric,exon
GO:0010608,0.00594852693922283,0.997158474144557,21,442,posttranscriptional regulation of gene expression,BP,hypergeometric,exon
GO:0060078,0.00606840808528009,0.998344155880759,8,105,regulation of postsynaptic membrane potential,BP,hypergeometric,exon
GO:0005521,0.00629896974432925,0.99950980119272,3,15,lamin binding,MF,hypergeometric,exon
GO:0016010,0.00629896974432925,0.99950980119272,3,15,dystrophin-associated glycoprotein complex,CC,hypergeometric,exon
GO:0017136,0.00629896974432925,0.99950980119272,3,15,NAD-dependent histone deacetylase activity,MF,hypergeometric,exon
GO:0070932,0.00629896974432925,0.99950980119272,3,15,histone H3 deacetylation,BP,hypergeometric,exon
GO:0090665,0.00629896974432925,0.99950980119272,3,15,glycoprotein complex,CC,hypergeometric,exon
GO:0042799,0.00640921224284449,0.999831947858548,2,5,histone methyltransferase activity (H4-K20 specific),MF,hypergeometric,exon
GO:0006417,0.00645462358502362,0.99716465608554,17,333,regulation of translation,BP,hypergeometric,exon
GO:0004672,0.00660042762467961,0.996757871040576,22,475,protein kinase activity,MF,hypergeometric,exon
GO:0140096,0.00666017797563746,0.995634147807162,62,1749,"catalytic activity, acting on a protein",MF,hypergeometric,exon
GO:0098978,0.0069063661629075,0.997030336188861,16,308,glutamatergic synapse,CC,hypergeometric,exon
GO:0048812,0.00709067458795616,0.996275408946273,26,596,neuron projection morphogenesis,BP,hypergeometric,exon
GO:0001530,0.00760482534101986,0.99935973784133,3,16,lipopolysaccharide binding,MF,hypergeometric,exon
GO:0034979,0.00760482534101986,0.99935973784133,3,16,NAD-dependent protein deacetylase activity,MF,hypergeometric,exon
GO:0032990,0.00849086103994623,0.995416577353773,27,635,cell part morphogenesis,BP,hypergeometric,exon
GO:0017124,0.0088581362629688,0.997415528095066,8,112,SH3 domain binding,MF,hypergeometric,exon
GO:0048786,0.00900594686638086,0.997941890840819,6,69,presynaptic active zone,CC,hypergeometric,exon
GO:0050998,0.00905867428616074,0.999179803069638,3,17,nitric-oxide synthase binding,MF,hypergeometric,exon
GO:0120039,0.0092449112526927,0.995036287853131,26,609,plasma membrane bounded cell projection morphogenesis,BP,hypergeometric,exon
GO:0042551,0.00941932759085543,0.998199094412227,5,50,neuron maturation,BP,hypergeometric,exon
GO:0006307,0.00944901132059712,0.999670385912661,2,6,DNA dealkylation involved in DNA repair,BP,hypergeometric,exon
GO:0018364,0.00944901132059712,0.999670385912661,2,6,peptidyl-glutamine methylation,BP,hypergeometric,exon
GO:0034774,0.00944901132059712,0.999670385912661,2,6,secretory granule lumen,CC,hypergeometric,exon
GO:0045162,0.00944901132059712,0.999670385912661,2,6,clustering of voltage-gated sodium channels,BP,hypergeometric,exon
GO:0050733,0.00944901132059712,0.999670385912661,2,6,RS domain binding,MF,hypergeometric,exon
GO:0060205,0.00944901132059712,0.999670385912661,2,6,cytoplasmic vesicle lumen,CC,hypergeometric,exon
GO:0061743,0.00944901132059712,0.999670385912661,2,6,motor learning,BP,hypergeometric,exon
GO:1904491,0.00944901132059712,0.999670385912661,2,6,protein localization to ciliary transition zone,BP,hypergeometric,exon
GO:0032989,0.00949395795019033,0.994711343902654,29,702,cellular component morphogenesis,BP,hypergeometric,exon
GO:0035195,0.00964055395248507,0.997763195385397,6,70,gene silencing by miRNA,BP,hypergeometric,exon
GO:0031175,0.00994681329726276,0.994046447103551,37,956,neuron projection development,BP,hypergeometric,exon
GO:0106310,0.00998984375022109,0.99612727822261,12,213,protein serine kinase activity,MF,hypergeometric,exon
GO:0048858,0.0100064639592394,0.994591674695783,26,613,cell projection morphogenesis,BP,hypergeometric,exon
GO:0005262,0.0100769634292936,0.997292694587069,7,92,calcium channel activity,MF,hypergeometric,exon
GO:0030182,0.0101286172143591,0.993606470107266,46,1249,neuron differentiation,BP,hypergeometric,exon
GO:0019213,0.0101685182277018,0.998488591982456,4,33,deacetylase activity,MF,hypergeometric,exon
GO:0043414,0.0106227551357499,0.995499870086629,14,268,macromolecule methylation,BP,hypergeometric,exon
GO:0035510,0.0106637972735397,0.998966940650734,3,18,DNA dealkylation,BP,hypergeometric,exon
GO:0015030,0.0112930238546779,0.998265273974619,4,34,Cajal body,CC,hypergeometric,exon
GO:0036002,0.0112930238546779,0.998265273974619,4,34,pre-mRNA binding,MF,hypergeometric,exon
GO:0034248,0.0113212578689404,0.994589950185168,18,382,regulation of cellular amide metabolic process,BP,hypergeometric,exon
GO:0042995,0.0117045571347462,0.991919099253103,71,2106,cell projection,CC,hypergeometric,exon
GO:0016575,0.0117349092005755,0.997154652362235,6,73,histone deacetylation,BP,hypergeometric,exon
GO:0099060,0.0119791063533356,0.997562430051488,5,53,integral component of postsynaptic specialization membrane,CC,hypergeometric,exon
GO:0070006,0.012422900744845,0.998718087906755,3,19,metalloaminopeptidase activity,MF,hypergeometric,exon
GO:1905874,0.012422900744845,0.998718087906755,3,19,regulation of postsynaptic density organization,BP,hypergeometric,exon
GO:0097106,0.012494535512322,0.998018691492064,4,35,postsynaptic density organization,BP,hypergeometric,exon
GO:0000347,0.0130023357152794,0.999434299666109,2,7,THO complex,CC,hypergeometric,exon
GO:0000445,0.0130023357152794,0.999434299666109,2,7,THO complex part of transcription export complex,CC,hypergeometric,exon
GO:0018243,0.0130023357152794,0.999434299666109,2,7,protein O-linked glycosylation via threonine,BP,hypergeometric,exon
GO:0031428,0.0130023357152794,0.999434299666109,2,7,box C/D RNP complex,CC,hypergeometric,exon
GO:0031983,0.0130023357152794,0.999434299666109,2,7,vesicle lumen,CC,hypergeometric,exon
GO:0048788,0.0130023357152794,0.999434299666109,2,7,cytoskeleton of presynaptic active zone,CC,hypergeometric,exon
GO:0098882,0.0130023357152794,0.999434299666109,2,7,structural constituent of presynaptic active zone,MF,hypergeometric,exon
GO:0120206,0.0130023357152794,0.999434299666109,2,7,photoreceptor distal connecting cilium,CC,hypergeometric,exon
GO:1902416,0.0130023357152794,0.999434299666109,2,7,positive regulation of mRNA binding,BP,hypergeometric,exon
GO:2000288,0.0130023357152794,0.999434299666109,2,7,positive regulation of myoblast proliferation,BP,hypergeometric,exon
GO:0099055,0.0132975862097421,0.996683456610809,6,75,integral component of postsynaptic membrane,CC,hypergeometric,exon
GO:0098948,0.0139256855257431,0.997052699888228,5,55,intrinsic component of postsynaptic specialization membrane,CC,hypergeometric,exon
GO:0035194,0.0141310911948604,0.996426638616638,6,76,post-transcriptional gene silencing by RNA,BP,hypergeometric,exon
GO:0035456,0.014338152178608,0.998430190713145,3,20,response to interferon-beta,BP,hypergeometric,exon
GO:0006304,0.0150003351918339,0.996154962769325,6,77,DNA modification,BP,hypergeometric,exon
GO:0060255,0.0154690111585439,0.988374489669625,133,4360,regulation of macromolecule metabolic process,BP,hypergeometric,exon
GO:0014069,0.0155263873612603,0.992884129323164,15,309,postsynaptic density,CC,hypergeometric,exon
GO:0005686,0.01641121374313,0.998100217208524,3,21,U2 snRNP,CC,hypergeometric,exon
GO:0009048,0.01641121374313,0.998100217208524,3,21,dosage compensation by inactivation of X chromosome,BP,hypergeometric,exon
GO:0032467,0.01641121374313,0.998100217208524,3,21,positive regulation of cytokinesis,BP,hypergeometric,exon
GO:0007157,0.0165778313442515,0.99712541677968,4,38,heterophilic cell-cell adhesion via plasma membrane cell adhesion molecules,BP,hypergeometric,exon
GO:0099061,0.0165778313442515,0.99712541677968,4,38,integral component of postsynaptic density membrane,CC,hypergeometric,exon
GO:0098984,0.0165828517447545,0.992124762511948,16,340,neuron to neuron synapse,CC,hypergeometric,exon
GO:0098936,0.0168488339503574,0.99556487529048,6,79,intrinsic component of postsynaptic membrane,CC,hypergeometric,exon
GO:0018209,0.0168755630597796,0.992423236888657,14,284,peptidyl-serine modification,BP,hypergeometric,exon
GO:0006646,0.0170405518616028,0.999112312723691,2,8,phosphatidylethanolamine biosynthetic process,BP,hypergeometric,exon
GO:0014819,0.0170405518616028,0.999112312723691,2,8,regulation of skeletal muscle contraction,BP,hypergeometric,exon
GO:0017062,0.0170405518616028,0.999112312723691,2,8,respiratory chain complex III assembly,BP,hypergeometric,exon
GO:0019773,0.0170405518616028,0.999112312723691,2,8,"proteasome core complex, alpha-subunit complex",CC,hypergeometric,exon
GO:0034551,0.0170405518616028,0.999112312723691,2,8,mitochondrial respiratory chain complex III assembly,BP,hypergeometric,exon
GO:0097105,0.0170405518616028,0.999112312723691,2,8,presynaptic membrane assembly,BP,hypergeometric,exon
GO:0097151,0.0170405518616028,0.999112312723691,2,8,positive regulation of inhibitory postsynaptic potential,BP,hypergeometric,exon
GO:0099059,0.0170405518616028,0.999112312723691,2,8,integral component of presynaptic active zone membrane,CC,hypergeometric,exon
GO:1905216,0.0170405518616028,0.999112312723691,2,8,positive regulation of RNA binding,BP,hypergeometric,exon
GO:0051028,0.0170766820224877,0.99489744602348,7,102,mRNA transport,BP,hypergeometric,exon
GO:0120035,0.0171871541011217,0.990268121630614,26,642,regulation of plasma membrane bounded cell projection organization,BP,hypergeometric,exon
GO:0051020,0.0178216306976554,0.991942330853917,14,286,GTPase binding,MF,hypergeometric,exon
GO:0016441,0.0178294452674252,0.995245372293478,6,80,posttranscriptional gene silencing,BP,hypergeometric,exon
GO:0042391,0.0182936603080518,0.990994371664294,17,373,regulation of membrane potential,BP,hypergeometric,exon
GO:0120025,0.0184644953958469,0.987154412796604,64,1908,plasma membrane bounded cell projection,CC,hypergeometric,exon
GO:0016570,0.0185722233769539,0.990637644786844,18,403,histone modification,BP,hypergeometric,exon
GO:0048025,0.018643274379201,0.99772517028532,3,22,"negative regulation of mRNA splicing, via spliceosome",BP,hypergeometric,exon
GO:0007399,0.0187310422623481,0.986926781488835,65,1944,nervous system development,BP,hypergeometric,exon
GO:0032279,0.01959492774999,0.990759130067501,15,318,asymmetric synapse,CC,hypergeometric,exon
GO:0097484,0.0197136618439479,0.99638791770315,4,40,dendrite extension,BP,hypergeometric,exon
GO:0099146,0.0197136618439479,0.99638791770315,4,40,intrinsic component of postsynaptic density membrane,CC,hypergeometric,exon
GO:0016571,0.0203230451628732,0.993095689443587,8,130,histone methylation,BP,hypergeometric,exon
GO:0032559,0.0205063212154871,0.986583042913968,44,1237,adenyl ribonucleotide binding,MF,hypergeometric,exon
GO:0099175,0.020657598619026,0.993580619407077,7,106,regulation of postsynapse organization,BP,hypergeometric,exon
GO:0071840,0.0208962571722885,0.984007475169468,146,4883,cellular component organization or biogenesis,BP,hypergeometric,exon
GO:0016043,0.0209041739353869,0.984033324303694,141,4697,cellular component organization,BP,hypergeometric,exon
GO:0008170,0.0210045039043948,0.994182409481741,6,83,N-methyltransferase activity,MF,hypergeometric,exon
GO:0007549,0.0210350803759975,0.997302098932775,3,23,dosage compensation,BP,hypergeometric,exon
GO:0031344,0.0211554352339223,0.987797395948039,26,654,regulation of cell projection organization,BP,hypergeometric,exon
GO:0051168,0.021173388210541,0.99275097919502,8,131,nuclear export,BP,hypergeometric,exon
GO:0099084,0.0214094475720198,0.995972356140718,4,41,postsynaptic specialization organization,BP,hypergeometric,exon
GO:0006449,0.0215361615958979,0.99869408220843,2,9,regulation of translational termination,BP,hypergeometric,exon
GO:0008024,0.0215361615958979,0.99869408220843,2,9,cyclin/CDK positive transcription elongation factor complex,CC,hypergeometric,exon
GO:0010587,0.0215361615958979,0.99869408220843,2,9,miRNA catabolic process,BP,hypergeometric,exon
GO:0097322,0.0215361615958979,0.99869408220843,2,9,7SK snRNA binding,MF,hypergeometric,exon
GO:0098828,0.0215361615958979,0.99869408220843,2,9,modulation of inhibitory postsynaptic potential,BP,hypergeometric,exon
GO:1902415,0.0215361615958979,0.99869408220843,2,9,regulation of mRNA binding,BP,hypergeometric,exon
GO:2000169,0.0215361615958979,0.99869408220843,2,9,regulation of peptidyl-cysteine S-nitrosylation,BP,hypergeometric,exon
GO:0015085,0.0216286432576474,0.993214467646994,7,107,calcium ion transmembrane transporter activity,MF,hypergeometric,exon
GO:0030165,0.0216286432576474,0.993214467646994,7,107,PDZ domain binding,MF,hypergeometric,exon
GO:0018105,0.0221967933527092,0.990009314300178,13,266,peptidyl-serine phosphorylation,BP,hypergeometric,exon
GO:0018210,0.0226309168678963,0.9928327331188,7,108,peptidyl-threonine modification,BP,hypergeometric,exon
GO:0099572,0.0227275268316944,0.989081449467549,15,324,postsynaptic specialization,CC,hypergeometric,exon
GO:0048814,0.0233216756490901,0.993381162487382,6,85,regulation of dendrite morphogenesis,BP,hypergeometric,exon
GO:0030554,0.0234505513289509,0.984516319354717,44,1248,adenyl nucleotide binding,MF,hypergeometric,exon
GO:0048699,0.0240678493550072,0.983811369343244,48,1385,generation of neurons,BP,hypergeometric,exon
GO:0016773,0.0241957509566399,0.986372128150497,23,568,"phosphotransferase activity, alcohol group as acceptor",MF,hypergeometric,exon
GO:0022008,0.0246398516085619,0.983216664905841,51,1489,neurogenesis,BP,hypergeometric,exon
GO:0007188,0.0248274096333433,0.991238908343317,8,135,adenylate cyclase-modulating G protein-coupled receptor signaling pathway,BP,hypergeometric,exon
GO:0043228,0.0251457411314706,0.981016746162071,109,3545,non-membrane-bounded organelle,CC,hypergeometric,exon
GO:0043232,0.0251457411314706,0.981016746162071,109,3545,intracellular non-membrane-bounded organelle,CC,hypergeometric,exon
GO:0017022,0.0252961158610006,0.993726469532801,5,64,myosin binding,MF,hypergeometric,exon
GO:0051254,0.0253665675509501,0.98323716087313,43,1221,positive regulation of RNA metabolic process,BP,hypergeometric,exon
GO:0005524,0.0258323162532419,0.982988167157075,42,1189,ATP binding,MF,hypergeometric,exon
GO:0015931,0.0259159693749428,0.990104001392923,9,162,nucleobase-containing compound transport,BP,hypergeometric,exon
GO:0002364,0.0260191421481744,1,1,1,NK T cell lineage commitment,BP,hypergeometric,exon
GO:0003345,0.0260191421481744,1,1,1,proepicardium cell migration involved in pericardium morphogenesis,BP,hypergeometric,exon
GO:0004077,0.0260191421481744,1,1,1,biotin-[acetyl-CoA-carboxylase] ligase activity,MF,hypergeometric,exon
GO:0004078,0.0260191421481744,1,1,1,biotin-[methylcrotonoyl-CoA-carboxylase] ligase activity,MF,hypergeometric,exon
GO:0004079,0.0260191421481744,1,1,1,biotin-[methylmalonyl-CoA-carboxytransferase] ligase activity,MF,hypergeometric,exon
GO:0004080,0.0260191421481744,1,1,1,biotin-[propionyl-CoA-carboxylase (ATP-hydrolyzing)] ligase activity,MF,hypergeometric,exon
GO:0004103,0.0260191421481744,1,1,1,choline kinase activity,MF,hypergeometric,exon
GO:0004306,0.0260191421481744,1,1,1,ethanolamine-phosphate cytidylyltransferase activity,MF,hypergeometric,exon
GO:0004902,0.0260191421481744,1,1,1,granulocyte colony-stimulating factor receptor activity,MF,hypergeometric,exon
GO:0005731,0.0260191421481744,1,1,1,nucleolus organizer region,CC,hypergeometric,exon
GO:0006198,0.0260191421481744,1,1,1,cAMP catabolic process,BP,hypergeometric,exon
GO:0006452,0.0260191421481744,1,1,1,translational frameshifting,BP,hypergeometric,exon
GO:0007072,0.0260191421481744,1,1,1,positive regulation of transcription involved in exit from mitosis,BP,hypergeometric,exon
GO:0008612,0.0260191421481744,1,1,1,peptidyl-lysine modification to peptidyl-hypusine,BP,hypergeometric,exon
GO:0009305,0.0260191421481744,1,1,1,protein biotinylation,BP,hypergeometric,exon
GO:0017071,0.0260191421481744,1,1,1,intracellular cyclic nucleotide activated cation channel complex,CC,hypergeometric,exon
GO:0017122,0.0260191421481744,1,1,1,protein N-acetylglucosaminyltransferase complex,CC,hypergeometric,exon
GO:0018271,0.0260191421481744,1,1,1,biotin-protein ligase activity,MF,hypergeometric,exon
GO:0021627,0.0260191421481744,1,1,1,olfactory nerve morphogenesis,BP,hypergeometric,exon
GO:0021629,0.0260191421481744,1,1,1,olfactory nerve structural organization,BP,hypergeometric,exon
GO:0022614,0.0260191421481744,1,1,1,membrane to membrane docking,BP,hypergeometric,exon
GO:0030874,0.0260191421481744,1,1,1,nucleolar chromatin,CC,hypergeometric,exon
GO:0031151,0.0260191421481744,1,1,1,histone methyltransferase activity (H3-K79 specific),MF,hypergeometric,exon
GO:0031460,0.0260191421481744,1,1,1,glycine betaine transport,BP,hypergeometric,exon
GO:0031735,0.0260191421481744,1,1,1,CCR10 chemokine receptor binding,MF,hypergeometric,exon
GO:0034038,0.0260191421481744,1,1,1,deoxyhypusine synthase activity,MF,hypergeometric,exon
GO:0034231,0.0260191421481744,1,1,1,islet amyloid polypeptide processing,BP,hypergeometric,exon
GO:0034342,0.0260191421481744,1,1,1,response to type III interferon,BP,hypergeometric,exon
GO:0034693,0.0260191421481744,1,1,1,U11/U12 snRNP,CC,hypergeometric,exon
GO:0035037,0.0260191421481744,1,1,1,sperm entry,BP,hypergeometric,exon
GO:0035351,0.0260191421481744,1,1,1,heme transmembrane transport,BP,hypergeometric,exon
GO:0035660,0.0260191421481744,1,1,1,MyD88-dependent toll-like receptor 4 signaling pathway,BP,hypergeometric,exon
GO:0035846,0.0260191421481744,1,1,1,oviduct epithelium development,BP,hypergeometric,exon
GO:0039007,0.0260191421481744,1,1,1,pronephric nephron morphogenesis,BP,hypergeometric,exon
GO:0039008,0.0260191421481744,1,1,1,pronephric nephron tubule morphogenesis,BP,hypergeometric,exon
GO:0039020,0.0260191421481744,1,1,1,pronephric nephron tubule development,BP,hypergeometric,exon
GO:0042947,0.0260191421481744,1,1,1,glucoside transmembrane transporter activity,MF,hypergeometric,exon
GO:0044779,0.0260191421481744,1,1,1,meiotic spindle checkpoint signaling,BP,hypergeometric,exon
GO:0044785,0.0260191421481744,1,1,1,metaphase/anaphase transition of meiotic cell cycle,BP,hypergeometric,exon
GO:0047453,0.0260191421481744,1,1,1,ATP-dependent NAD(P)H-hydrate dehydratase activity,MF,hypergeometric,exon
GO:0048137,0.0260191421481744,1,1,1,spermatocyte division,BP,hypergeometric,exon
GO:0048297,0.0260191421481744,1,1,1,negative regulation of isotype switching to IgA isotypes,BP,hypergeometric,exon
GO:0048560,0.0260191421481744,1,1,1,establishment of anatomical structure orientation,BP,hypergeometric,exon
GO:0052855,0.0260191421481744,1,1,1,ADP-dependent NAD(P)H-hydrate dehydratase activity,MF,hypergeometric,exon
GO:0060817,0.0260191421481744,1,1,1,inactivation of paternal X chromosome,BP,hypergeometric,exon
GO:0060854,0.0260191421481744,1,1,1,branching involved in lymph vessel morphogenesis,BP,hypergeometric,exon
GO:0060857,0.0260191421481744,1,1,1,establishment of glial blood-brain barrier,BP,hypergeometric,exon
GO:0061725,0.0260191421481744,1,1,1,cytosolic lipolysis,BP,hypergeometric,exon
GO:0070401,0.0260191421481744,1,1,1,NADP+ binding,MF,hypergeometric,exon
GO:0070731,0.0260191421481744,1,1,1,cGMP transport,BP,hypergeometric,exon
GO:0070781,0.0260191421481744,1,1,1,response to biotin,BP,hypergeometric,exon
GO:0071110,0.0260191421481744,1,1,1,histone biotinylation,BP,hypergeometric,exon
GO:0071788,0.0260191421481744,1,1,1,endoplasmic reticulum tubular network maintenance,BP,hypergeometric,exon
GO:0072114,0.0260191421481744,1,1,1,pronephros morphogenesis,BP,hypergeometric,exon
GO:0075523,0.0260191421481744,1,1,1,viral translational frameshifting,BP,hypergeometric,exon
GO:0097372,0.0260191421481744,1,1,1,NAD-dependent histone deacetylase activity (H3-K18 specific),MF,hypergeometric,exon
GO:0098898,0.0260191421481744,1,1,1,dense core granule lumen,CC,hypergeometric,exon
GO:0099013,0.0260191421481744,1,1,1,neuronal dense core vesicle lumen,CC,hypergeometric,exon
GO:0106217,0.0260191421481744,1,1,1,tRNA C3-cytosine methylation,BP,hypergeometric,exon
GO:0110051,0.0260191421481744,1,1,1,metabolite repair,BP,hypergeometric,exon
GO:1900276,0.0260191421481744,1,1,1,regulation of proteinase activated receptor activity,BP,hypergeometric,exon
GO:1900737,0.0260191421481744,1,1,1,negative regulation of phospholipase C-activating G protein-coupled receptor signaling pathway,BP,hypergeometric,exon
GO:1901994,0.0260191421481744,1,1,1,negative regulation of meiotic cell cycle phase transition,BP,hypergeometric,exon
GO:1902102,0.0260191421481744,1,1,1,regulation of metaphase/anaphase transition of meiotic cell cycle,BP,hypergeometric,exon
GO:1902103,0.0260191421481744,1,1,1,negative regulation of metaphase/anaphase transition of meiotic cell cycle,BP,hypergeometric,exon
GO:1903621,0.0260191421481744,1,1,1,protein localization to photoreceptor connecting cilium,BP,hypergeometric,exon
GO:1903840,0.0260191421481744,1,1,1,response to arsenite(3-),BP,hypergeometric,exon
GO:1903841,0.0260191421481744,1,1,1,cellular response to arsenite(3-),BP,hypergeometric,exon
GO:1904924,0.0260191421481744,1,1,1,negative regulation of mitophagy in response to mitochondrial depolarization,BP,hypergeometric,exon
GO:1905132,0.0260191421481744,1,1,1,regulation of meiotic chromosome separation,BP,hypergeometric,exon
GO:1905133,0.0260191421481744,1,1,1,negative regulation of meiotic chromosome separation,BP,hypergeometric,exon
GO:1905370,0.0260191421481744,1,1,1,serine-type endopeptidase complex,CC,hypergeometric,exon
GO:1905528,0.0260191421481744,1,1,1,positive regulation of Golgi lumen acidification,BP,hypergeometric,exon
GO:1905535,0.0260191421481744,1,1,1,regulation of eukaryotic translation initiation factor 4F complex assembly,BP,hypergeometric,exon
GO:1905537,0.0260191421481744,1,1,1,positive regulation of eukaryotic translation initiation factor 4F complex assembly,BP,hypergeometric,exon
GO:1905610,0.0260191421481744,1,1,1,regulation of mRNA cap binding,BP,hypergeometric,exon
GO:1905612,0.0260191421481744,1,1,1,positive regulation of mRNA cap binding,BP,hypergeometric,exon
GO:1905693,0.0260191421481744,1,1,1,regulation of phosphatidic acid biosynthetic process,BP,hypergeometric,exon
GO:1990275,0.0260191421481744,1,1,1,preribosome binding,MF,hypergeometric,exon
GO:1990679,0.0260191421481744,1,1,1,histone H4-K12 deacetylation,BP,hypergeometric,exon
GO:1990983,0.0260191421481744,1,1,1,tRNA demethylation,BP,hypergeometric,exon
GO:2001124,0.0260191421481744,1,1,1,regulation of translational frameshifting,BP,hypergeometric,exon
GO:2001125,0.0260191421481744,1,1,1,negative regulation of translational frameshifting,BP,hypergeometric,exon
GO:0003712,0.0261830136712288,0.986282625663114,18,419,transcription coregulator activity,MF,hypergeometric,exon
GO:0048787,0.0262988737441188,0.996300369946869,3,25,presynaptic active zone membrane,CC,hypergeometric,exon
GO:0060219,0.0262988737441188,0.996300369946869,3,25,camera-type eye photoreceptor cell differentiation,BP,hypergeometric,exon
GO:0097346,0.0262988737441188,0.996300369946869,3,25,INO80-type complex,CC,hypergeometric,exon
GO:0007076,0.0264627627181528,0.998170242893122,2,10,mitotic chromosome condensation,BP,hypergeometric,exon
GO:0045295,0.0264627627181528,0.998170242893122,2,10,gamma-catenin binding,MF,hypergeometric,exon
GO:0046784,0.0264627627181528,0.998170242893122,2,10,viral mRNA export from host cell nucleus,BP,hypergeometric,exon
GO:0072344,0.0264627627181528,0.998170242893122,2,10,rescue of stalled ribosome,BP,hypergeometric,exon
GO:0098992,0.0264627627181528,0.998170242893122,2,10,neuronal dense core vesicle,CC,hypergeometric,exon
GO:0099569,0.0264627627181528,0.998170242893122,2,10,presynaptic cytoskeleton,CC,hypergeometric,exon
GO:1902514,0.0264627627181528,0.998170242893122,2,10,regulation of calcium ion transmembrane transport via high voltage-gated calcium channel,BP,hypergeometric,exon
GO:2000234,0.0264627627181528,0.998170242893122,2,10,positive regulation of rRNA processing,BP,hypergeometric,exon
GO:2000291,0.0264627627181528,0.998170242893122,2,10,regulation of myoblast proliferation,BP,hypergeometric,exon
GO:0001726,0.0268106712702384,0.990398604316113,8,137,ruffle,CC,hypergeometric,exon
GO:0022618,0.0268281627699122,0.989692673161201,9,163,ribonucleoprotein complex assembly,BP,hypergeometric,exon
GO:0051276,0.0279970062451072,0.983100596200087,28,735,chromosome organization,BP,hypergeometric,exon
GO:0045935,0.0281549095190269,0.980938201334142,47,1365,positive regulation of nucleobase-containing compound metabolic process,BP,hypergeometric,exon
GO:1905369,0.0284436467796072,0.992718394195371,5,66,endopeptidase complex,CC,hypergeometric,exon
GO:0032555,0.0289692317509524,0.980060879890373,51,1504,purine ribonucleotide binding,MF,hypergeometric,exon
GO:0010628,0.029034505530695,0.982107217232976,30,802,positive regulation of gene expression,BP,hypergeometric,exon
GO:0051171,0.0292039065165349,0.977621711721305,120,3968,regulation of nitrogen compound metabolic process,BP,hypergeometric,exon
GO:0003730,0.0298486916670382,0.991021344231726,6,90,mRNA 3'-UTR binding,MF,hypergeometric,exon
GO:0048667,0.0299806055525673,0.982978234536832,22,549,cell morphogenesis involved in neuron differentiation,BP,hypergeometric,exon
GO:0004386,0.0311022868165061,0.988537032574682,8,141,helicase activity,MF,hypergeometric,exon
GO:0031078,0.0317950108288746,0.997532353780095,2,11,histone deacetylase activity (H3-K14 specific),MF,hypergeometric,exon
GO:0032041,0.0317950108288746,0.997532353780095,2,11,NAD-dependent histone deacetylase activity (H3-K14 specific),MF,hypergeometric,exon
GO:0044417,0.0317950108288746,0.997532353780095,2,11,translocation of molecules into host,BP,hypergeometric,exon
GO:0045503,0.0317950108288746,0.997532353780095,2,11,dynein light chain binding,MF,hypergeometric,exon
GO:0061577,0.0317950108288746,0.997532353780095,2,11,calcium ion transmembrane transport via high voltage-gated calcium channel,BP,hypergeometric,exon
GO:0070444,0.0317950108288746,0.997532353780095,2,11,oligodendrocyte progenitor proliferation,BP,hypergeometric,exon
GO:0070445,0.0317950108288746,0.997532353780095,2,11,regulation of oligodendrocyte progenitor proliferation,BP,hypergeometric,exon
GO:0097050,0.0317950108288746,0.997532353780095,2,11,type B pancreatic cell apoptotic process,BP,hypergeometric,exon
GO:0097090,0.0317950108288746,0.997532353780095,2,11,presynaptic membrane organization,BP,hypergeometric,exon
GO:0097157,0.0317950108288746,0.997532353780095,2,11,pre-mRNA intronic binding,MF,hypergeometric,exon
GO:0099545,0.0317950108288746,0.997532353780095,2,11,trans-synaptic signaling by trans-synaptic complex,BP,hypergeometric,exon
GO:0044728,0.0318288343624074,0.991598212934245,5,68,DNA methylation or demethylation,BP,hypergeometric,exon
GO:0016301,0.0320791296972595,0.981191048734366,24,616,kinase activity,MF,hypergeometric,exon
GO:0008376,0.032200783848976,0.995072709236009,3,27,acetylgalactosaminyltransferase activity,MF,hypergeometric,exon
GO:0033119,0.032200783848976,0.995072709236009,3,27,negative regulation of RNA splicing,BP,hypergeometric,exon
GO:0017076,0.0328495273434254,0.977203037775135,51,1516,purine nucleotide binding,MF,hypergeometric,exon
GO:0032553,0.0331904631393147,0.976950705534491,51,1517,ribonucleotide binding,MF,hypergeometric,exon
GO:0032259,0.033327624938588,0.98363155467733,14,311,methylation,BP,hypergeometric,exon
GO:0006406,0.0334317167906019,0.992736362414167,4,47,mRNA export from nucleus,BP,hypergeometric,exon
GO:0071427,0.0334317167906019,0.992736362414167,4,47,mRNA-containing ribonucleoprotein complex export from nucleus,BP,hypergeometric,exon
GO:0098889,0.0334317167906019,0.992736362414167,4,47,intrinsic component of presynaptic membrane,CC,hypergeometric,exon
GO:0097060,0.0336515114469714,0.982999396878626,15,341,synaptic membrane,CC,hypergeometric,exon
GO:0035639,0.0337648544888384,0.976684783377775,49,1450,purine ribonucleoside triphosphate binding,MF,hypergeometric,exon
GO:0071826,0.0338557159926917,0.986438588617973,9,170,ribonucleoprotein complex subunit organization,BP,hypergeometric,exon
GO:0006476,0.034287760528318,0.989338591241467,6,93,protein deacetylation,BP,hypergeometric,exon
GO:0042734,0.0344610856628528,0.988069137674303,7,118,presynaptic membrane,CC,hypergeometric,exon
GO:0019904,0.0347544141426816,0.979011872993212,26,685,protein domain specific binding,MF,hypergeometric,exon
GO:0005815,0.0347991484011321,0.979200487718266,25,653,microtubule organizing center,CC,hypergeometric,exon
GO:0003724,0.0354558200246152,0.990359446047515,5,70,RNA helicase activity,MF,hypergeometric,exon
GO:0098793,0.0359459201940462,0.980462712552271,18,435,presynapse,CC,hypergeometric,exon
GO:0051128,0.036218966166917,0.973864863272082,63,1943,regulation of cellular component organization,BP,hypergeometric,exon
GO:0007605,0.0372405340868037,0.986888935748251,7,120,sensory perception of sound,BP,hypergeometric,exon
GO:0008186,0.037361079241315,0.989693601635822,5,71,"ATP-dependent activity, acting on RNA",MF,hypergeometric,exon
GO:0016525,0.037361079241315,0.989693601635822,5,71,negative regulation of angiogenesis,BP,hypergeometric,exon
GO:1905368,0.0374719912218503,0.988096394078423,6,95,peptidase complex,CC,hypergeometric,exon
GO:0016018,0.0375085824014096,0.996772847033801,2,12,cyclosporin A binding,MF,hypergeometric,exon
GO:0018119,0.0375085824014096,0.996772847033801,2,12,peptidyl-cysteine S-nitrosylation,BP,hypergeometric,exon
GO:0045161,0.0375085824014096,0.996772847033801,2,12,neuronal ion channel clustering,BP,hypergeometric,exon
GO:0045504,0.0375085824014096,0.996772847033801,2,12,dynein heavy chain binding,MF,hypergeometric,exon
GO:0046548,0.0375085824014096,0.996772847033801,2,12,retinal rod cell development,BP,hypergeometric,exon
GO:1905214,0.0375085824014096,0.996772847033801,2,12,regulation of RNA binding,BP,hypergeometric,exon
GO:0019933,0.0381573585793419,0.991342514609453,4,49,cAMP-mediated signaling,BP,hypergeometric,exon
GO:0043005,0.0383290557911172,0.973801673220777,44,1291,neuron projection,CC,hypergeometric,exon
GO:0006325,0.0385676244662611,0.979261755831479,17,408,chromatin organization,BP,hypergeometric,exon
GO:0045202,0.0386575782553925,0.974028526201088,40,1156,synapse,CC,hypergeometric,exon
GO:0004177,0.0387336432418149,0.993598089971623,3,29,aminopeptidase activity,MF,hypergeometric,exon
GO:0033137,0.0387336432418149,0.993598089971623,3,29,negative regulation of peptidyl-serine phosphorylation,BP,hypergeometric,exon
GO:0034331,0.0387336432418149,0.993598089971623,3,29,cell junction maintenance,BP,hypergeometric,exon
GO:0045132,0.039328006027607,0.988995739694998,5,72,meiotic chromosome segregation,BP,hypergeometric,exon
GO:0032991,0.0400948154303875,0.968699888328107,127,4273,protein-containing complex,CC,hypergeometric,exon
GO:0050773,0.040163735274715,0.98562544565361,7,122,regulation of dendrite development,BP,hypergeometric,exon
GO:0006414,0.040656317795732,0.990580672409145,4,50,translational elongation,BP,hypergeometric,exon
GO:2000181,0.0413569102060652,0.988265090799425,5,73,negative regulation of blood vessel morphogenesis,BP,hypergeometric,exon
GO:0009987,0.0418147925866087,0.969246260152669,308,11326,cellular process,BP,hypergeometric,exon
GO:0048813,0.0420626908227106,0.982468264751628,9,177,dendrite morphogenesis,BP,hypergeometric,exon
GO:0032786,0.042233159564497,0.992762003662324,3,30,"positive regulation of DNA-templated transcription, elongation",BP,hypergeometric,exon
GO:0050686,0.042233159564497,0.992762003662324,3,30,negative regulation of mRNA processing,BP,hypergeometric,exon
GO:0071300,0.042233159564497,0.992762003662324,3,30,cellular response to retinoic acid,BP,hypergeometric,exon
GO:0099634,0.0434480556714251,0.987500897215902,5,74,postsynaptic specialization membrane,CC,hypergeometric,exon
GO:1901343,0.0434480556714251,0.987500897215902,5,74,negative regulation of vasculature development,BP,hypergeometric,exon
GO:0000346,0.0435801390515398,0.995884979174306,2,13,transcription export complex,CC,hypergeometric,exon
GO:0016423,0.0435801390515398,0.995884979174306,2,13,tRNA (guanine) methyltransferase activity,MF,hypergeometric,exon
GO:0017014,0.0435801390515398,0.995884979174306,2,13,protein nitrosylation,BP,hypergeometric,exon
GO:0019908,0.0435801390515398,0.995884979174306,2,13,nuclear cyclin-dependent protein kinase holoenzyme complex,CC,hypergeometric,exon
GO:0051450,0.0435801390515398,0.995884979174306,2,13,myoblast proliferation,BP,hypergeometric,exon
GO:0071340,0.0435801390515398,0.995884979174306,2,13,skeletal muscle acetylcholine-gated channel clustering,BP,hypergeometric,exon
GO:0099511,0.0435801390515398,0.995884979174306,2,13,voltage-gated calcium channel activity involved in regulation of cytosolic calcium levels,MF,hypergeometric,exon
GO:0099626,0.0435801390515398,0.995884979174306,2,13,voltage-gated calcium channel activity involved in regulation of presynaptic cytosolic calcium levels,MF,hypergeometric,exon
GO:0007043,0.0443922447162695,0.985303808715545,6,99,cell-cell junction assembly,BP,hypergeometric,exon
GO:0098609,0.044534325310904,0.973984678665221,21,541,cell-cell adhesion,BP,hypergeometric,exon
GO:0006403,0.0452679090381354,0.982029154603235,8,152,RNA localization,BP,hypergeometric,exon
GO:0097367,0.0455447322346465,0.96722200745454,56,1723,carbohydrate derivative binding,MF,hypergeometric,exon
GO:0022607,0.0455584290176189,0.966198393361163,70,2217,cellular component assembly,BP,hypergeometric,exon
GO:0001964,0.0458856742790589,0.991856977771414,3,31,startle response,BP,hypergeometric,exon
GO:0099068,0.0458856742790589,0.991856977771414,3,31,postsynapse assembly,BP,hypergeometric,exon
GO:0031047,0.046238881791613,0.984538402797447,6,100,gene silencing by RNA,BP,hypergeometric,exon
GO:0050657,0.0464496228069567,0.982836154431735,7,126,nucleic acid transport,BP,hypergeometric,exon
GO:0050658,0.0464496228069567,0.982836154431735,7,126,RNA transport,BP,hypergeometric,exon
GO:0006400,0.0478178979173481,0.98586890880514,5,76,tRNA modification,BP,hypergeometric,exon
GO:0016772,0.0480038269883204,0.969813536606318,27,740,"transferase activity, transferring phosphorus-containing groups",MF,hypergeometric,exon
GO:0016811,0.0486979553391238,0.988020893646664,4,53,"hydrolase activity, acting on carbon-nitrogen (but not peptide) bonds, in linear amides",MF,hypergeometric,exon
GO:0051962,0.0495070287592243,0.975012795505186,13,299,positive regulation of nervous system development,BP,hypergeometric,exon
GO:0070717,0.0496891055973518,0.990880828464439,3,32,poly-purine tract binding,MF,hypergeometric,exon
GO:0071514,0.0496891055973518,0.990880828464439,3,32,genetic imprinting,BP,hypergeometric,exon
GO:0003714,0.0497623160475292,0.979862668817914,8,155,transcription corepressor activity,MF,hypergeometric,exon
GO:0001650,0.0498158466175637,0.981304271560474,7,128,fibrillar center,CC,hypergeometric,exon
GO:0004653,0.0499872929673099,0.994862784443081,2,14,polypeptide N-acetylgalactosaminyltransferase activity,MF,hypergeometric,exon
GO:0010917,0.0499872929673099,0.994862784443081,2,14,negative regulation of mitochondrial membrane potential,BP,hypergeometric,exon
GO:0043951,0.0499872929673099,0.994862784443081,2,14,negative regulation of cAMP-mediated signaling,BP,hypergeometric,exon
GO:0048096,0.0499872929673099,0.994862784443081,2,14,chromatin-mediated maintenance of transcription,BP,hypergeometric,exon
GO:0060019,0.0499872929673099,0.994862784443081,2,14,radial glial cell differentiation,BP,hypergeometric,exon
GO:0060134,0.0499872929673099,0.994862784443081,2,14,prepulse inhibition,BP,hypergeometric,exon
GO:0099151,0.0499872929673099,0.994862784443081,2,14,regulation of postsynaptic density assembly,BP,hypergeometric,exon
GO:0140098,0.050401920872063,0.973776489465818,14,330,"catalytic activity, acting on RNA",MF,hypergeometric,exon
GO:0000829,0.0513630853438367,0.999324801047488,1,2,inositol heptakisphosphate kinase activity,MF,hypergeometric,exon
GO:0002101,0.0513630853438367,0.999324801047488,1,2,tRNA wobble cytosine modification,BP,hypergeometric,exon
GO:0002133,0.0513630853438367,0.999324801047488,1,2,polycystin complex,CC,hypergeometric,exon
GO:0002254,0.0513630853438367,0.999324801047488,1,2,kinin cascade,BP,hypergeometric,exon
GO:0002353,0.0513630853438367,0.999324801047488,1,2,plasma kallikrein-kinin cascade,BP,hypergeometric,exon
GO:0002362,0.0513630853438367,0.999324801047488,1,2,"CD4-positive, CD25-positive, alpha-beta regulatory T cell lineage commitment",BP,hypergeometric,exon
GO:0002944,0.0513630853438367,0.999324801047488,1,2,cyclin K-CDK12 complex,CC,hypergeometric,exon
GO:0004118,0.0513630853438367,0.999324801047488,1,2,cGMP-stimulated cyclic-nucleotide phosphodiesterase activity,MF,hypergeometric,exon
GO:0005052,0.0513630853438367,0.999324801047488,1,2,peroxisome matrix targeting signal-1 binding,MF,hypergeometric,exon
GO:0005228,0.0513630853438367,0.999324801047488,1,2,intracellular sodium activated potassium channel activity,MF,hypergeometric,exon
GO:0005295,0.0513630853438367,0.999324801047488,1,2,neutral amino acid:sodium symporter activity,MF,hypergeometric,exon
GO:0005668,0.0513630853438367,0.999324801047488,1,2,RNA polymerase transcription factor SL1 complex,CC,hypergeometric,exon
GO:0006580,0.0513630853438367,0.999324801047488,1,2,ethanolamine metabolic process,BP,hypergeometric,exon
GO:0006864,0.0513630853438367,0.999324801047488,1,2,pyrimidine nucleotide transport,BP,hypergeometric,exon
GO:0007527,0.0513630853438367,0.999324801047488,1,2,adult somatic muscle development,BP,hypergeometric,exon
GO:0008065,0.0513630853438367,0.999324801047488,1,2,establishment of blood-nerve barrier,BP,hypergeometric,exon
GO:0008384,0.0513630853438367,0.999324801047488,1,2,IkappaB kinase activity,MF,hypergeometric,exon
GO:0008479,0.0513630853438367,0.999324801047488,1,2,queuine tRNA-ribosyltransferase activity,MF,hypergeometric,exon
GO:0010610,0.0513630853438367,0.999324801047488,1,2,regulation of mRNA stability involved in response to stress,BP,hypergeometric,exon
GO:0010705,0.0513630853438367,0.999324801047488,1,2,meiotic DNA double-strand break processing involved in reciprocal meiotic recombination,BP,hypergeometric,exon
GO:0014809,0.0513630853438367,0.999324801047488,1,2,regulation of skeletal muscle contraction by regulation of release of sequestered calcium ion,BP,hypergeometric,exon
GO:0014853,0.0513630853438367,0.999324801047488,1,2,regulation of excitatory postsynaptic membrane potential involved in skeletal muscle contraction,BP,hypergeometric,exon
GO:0015218,0.0513630853438367,0.999324801047488,1,2,pyrimidine nucleotide transmembrane transporter activity,MF,hypergeometric,exon
GO:0016262,0.0513630853438367,0.999324801047488,1,2,protein N-acetylglucosaminyltransferase activity,MF,hypergeometric,exon
GO:0016340,0.0513630853438367,0.999324801047488,1,2,calcium-dependent cell-matrix adhesion,BP,hypergeometric,exon
GO:0019085,0.0513630853438367,0.999324801047488,1,2,early viral transcription,BP,hypergeometric,exon
GO:0021563,0.0513630853438367,0.999324801047488,1,2,glossopharyngeal nerve development,BP,hypergeometric,exon
GO:0021564,0.0513630853438367,0.999324801047488,1,2,vagus nerve development,BP,hypergeometric,exon
GO:0030156,0.0513630853438367,0.999324801047488,1,2,benzodiazepine receptor binding,MF,hypergeometric,exon
GO:0030626,0.0513630853438367,0.999324801047488,1,2,U12 snRNA binding,MF,hypergeometric,exon
GO:0030862,0.0513630853438367,0.999324801047488,1,2,positive regulation of polarized epithelial cell differentiation,BP,hypergeometric,exon
GO:0033857,0.0513630853438367,0.999324801047488,1,2,diphosphoinositol-pentakisphosphate kinase activity,MF,hypergeometric,exon
GO:0034230,0.0513630853438367,0.999324801047488,1,2,enkephalin processing,BP,hypergeometric,exon
GO:0035844,0.0513630853438367,0.999324801047488,1,2,cloaca development,BP,hypergeometric,exon
GO:0036048,0.0513630853438367,0.999324801047488,1,2,protein desuccinylation,BP,hypergeometric,exon
GO:0036049,0.0513630853438367,0.999324801047488,1,2,peptidyl-lysine desuccinylation,BP,hypergeometric,exon
GO:0036055,0.0513630853438367,0.999324801047488,1,2,protein-succinyllysine desuccinylase activity,MF,hypergeometric,exon
GO:0038028,0.0513630853438367,0.999324801047488,1,2,insulin receptor signaling pathway via phosphatidylinositol 3-kinase,BP,hypergeometric,exon
GO:0039019,0.0513630853438367,0.999324801047488,1,2,pronephric nephron development,BP,hypergeometric,exon
GO:0042245,0.0513630853438367,0.999324801047488,1,2,RNA repair,BP,hypergeometric,exon
GO:0043375,0.0513630853438367,0.999324801047488,1,2,"CD8-positive, alpha-beta T cell lineage commitment",BP,hypergeometric,exon
GO:0046203,0.0513630853438367,0.999324801047488,1,2,spermidine catabolic process,BP,hypergeometric,exon
GO:0061697,0.0513630853438367,0.999324801047488,1,2,protein-glutaryllysine deglutarylase activity,MF,hypergeometric,exon
GO:0061698,0.0513630853438367,0.999324801047488,1,2,protein deglutarylation,BP,hypergeometric,exon
GO:0061795,0.0513630853438367,0.999324801047488,1,2,Golgi lumen acidification,BP,hypergeometric,exon
GO:0061884,0.0513630853438367,0.999324801047488,1,2,regulation of mini excitatory postsynaptic potential,BP,hypergeometric,exon
GO:0061885,0.0513630853438367,0.999324801047488,1,2,positive regulation of mini excitatory postsynaptic potential,BP,hypergeometric,exon
GO:0070730,0.0513630853438367,0.999324801047488,1,2,cAMP transport,BP,hypergeometric,exon
GO:0071691,0.0513630853438367,0.999324801047488,1,2,cardiac muscle thin filament assembly,BP,hypergeometric,exon
GO:0072518,0.0513630853438367,0.999324801047488,1,2,Rho-dependent protein serine/threonine kinase activity,MF,hypergeometric,exon
GO:0086059,0.0513630853438367,0.999324801047488,1,2,voltage-gated calcium channel activity involved SA node cell action potential,MF,hypergeometric,exon
GO:0090152,0.0513630853438367,0.999324801047488,1,2,establishment of protein localization to mitochondrial membrane involved in mitochondrial fission,BP,hypergeometric,exon
GO:0090497,0.0513630853438367,0.999324801047488,1,2,mesenchymal cell migration,BP,hypergeometric,exon
GO:0097750,0.0513630853438367,0.999324801047488,1,2,endosome membrane tubulation,BP,hypergeometric,exon
GO:0098770,0.0513630853438367,0.999324801047488,1,2,FBXO family protein binding,MF,hypergeometric,exon
GO:0098816,0.0513630853438367,0.999324801047488,1,2,mini excitatory postsynaptic potential,BP,hypergeometric,exon
GO:0102092,0.0513630853438367,0.999324801047488,1,2,5-diphosphoinositol pentakisphosphate 3-kinase activity,MF,hypergeometric,exon
GO:0106003,0.0513630853438367,0.999324801047488,1,2,amyloid-beta complex,CC,hypergeometric,exon
GO:0106230,0.0513630853438367,0.999324801047488,1,2,protein depropionylation,BP,hypergeometric,exon
GO:0106231,0.0513630853438367,0.999324801047488,1,2,protein-propionyllysine depropionylase activity,MF,hypergeometric,exon
GO:0110061,0.0513630853438367,0.999324801047488,1,2,regulation of angiotensin-activated signaling pathway,BP,hypergeometric,exon
GO:1900210,0.0513630853438367,0.999324801047488,1,2,positive regulation of cardiolipin metabolic process,BP,hypergeometric,exon
GO:1901898,0.0513630853438367,0.999324801047488,1,2,negative regulation of relaxation of cardiac muscle,BP,hypergeometric,exon
GO:1902232,0.0513630853438367,0.999324801047488,1,2,regulation of positive thymic T cell selection,BP,hypergeometric,exon
GO:1902442,0.0513630853438367,0.999324801047488,1,2,regulation of ripoptosome assembly involved in necroptotic process,BP,hypergeometric,exon
GO:1902443,0.0513630853438367,0.999324801047488,1,2,negative regulation of ripoptosome assembly involved in necroptotic process,BP,hypergeometric,exon
GO:1902524,0.0513630853438367,0.999324801047488,1,2,positive regulation of protein K48-linked ubiquitination,BP,hypergeometric,exon
GO:1905286,0.0513630853438367,0.999324801047488,1,2,serine-type peptidase complex,CC,hypergeometric,exon
GO:1905526,0.0513630853438367,0.999324801047488,1,2,regulation of Golgi lumen acidification,BP,hypergeometric,exon
GO:1990074,0.0513630853438367,0.999324801047488,1,2,polyuridylation-dependent mRNA catabolic process,BP,hypergeometric,exon
GO:1990259,0.0513630853438367,0.999324801047488,1,2,histone-glutamine methyltransferase activity,MF,hypergeometric,exon
GO:1990519,0.0513630853438367,0.999324801047488,1,2,pyrimidine nucleotide import into mitochondrion,BP,hypergeometric,exon
GO:1990984,0.0513630853438367,0.999324801047488,1,2,tRNA demethylase activity,MF,hypergeometric,exon
GO:2000620,0.0513630853438367,0.999324801047488,1,2,positive regulation of histone H4-K16 acetylation,BP,hypergeometric,exon
GO:2000815,0.0513630853438367,0.999324801047488,1,2,regulation of mRNA stability involved in response to oxidative stress,BP,hypergeometric,exon
GO:0051236,0.0515554366845075,0.980502723120601,7,129,establishment of RNA localization,BP,hypergeometric,exon
GO:0001885,0.0515595797272049,0.987072349511891,4,54,endothelial cell development,BP,hypergeometric,exon
GO:0034704,0.0515595797272049,0.987072349511891,4,54,calcium channel complex,CC,hypergeometric,exon
GO:0042054,0.0515595797272049,0.987072349511891,4,54,histone methyltransferase activity,MF,hypergeometric,exon
GO:0043954,0.0515595797272049,0.987072349511891,4,54,cellular component maintenance,BP,hypergeometric,exon
GO:0034399,0.0520620283075022,0.982072651154244,6,103,nuclear periphery,CC,hypergeometric,exon
GO:0035601,0.0520620283075022,0.982072651154244,6,103,protein deacylation,BP,hypergeometric,exon
GO:0098732,0.0520620283075022,0.982072651154244,6,103,macromolecule deacylation,BP,hypergeometric,exon
GO:0120036,0.0526841639283191,0.962990431857235,45,1356,plasma membrane bounded cell projection organization,BP,hypergeometric,exon
GO:0019222,0.0535947096933162,0.957378792476684,138,4729,regulation of metabolic process,BP,hypergeometric,exon
GO:0005891,0.0536411643343168,0.989831481772298,3,33,voltage-gated calcium channel complex,CC,hypergeometric,exon
GO:0030030,0.0539555683939669,0.961891463915594,46,1393,cell projection organization,BP,hypergeometric,exon
GO:0006446,0.0545112577037901,0.986074314474257,4,55,regulation of translational initiation,BP,hypergeometric,exon
GO:0005813,0.0546748855301463,0.96731817831682,21,554,centrosome,CC,hypergeometric,exon
GO:0000166,0.0550175838015797,0.960004332305804,55,1709,nucleotide binding,MF,hypergeometric,exon
GO:1901265,0.0550175838015797,0.960004332305804,55,1709,nucleoside phosphate binding,MF,hypergeometric,exon
GO:0042383,0.0551483455988417,0.978826611789459,7,131,sarcolemma,CC,hypergeometric,exon
GO:0080090,0.055625625073161,0.956031152354937,121,4102,regulation of primary metabolic process,BP,hypergeometric,exon
GO:0044085,0.0560166518790911,0.957515495440887,76,2458,cellular component biogenesis,BP,hypergeometric,exon
GO:0030016,0.0561909532646535,0.976688477765873,8,159,myofibril,CC,hypergeometric,exon
GO:0006415,0.0567085734631531,0.993701030255671,2,15,translational termination,BP,hypergeometric,exon
GO:0031011,0.0567085734631531,0.993701030255671,2,15,Ino80 complex,CC,hypergeometric,exon
GO:0032793,0.0567085734631531,0.993701030255671,2,15,positive regulation of CREB transcription factor activity,BP,hypergeometric,exon
GO:0035278,0.0567085734631531,0.993701030255671,2,15,miRNA mediated inhibition of translation,BP,hypergeometric,exon
GO:0043034,0.0567085734631531,0.993701030255671,2,15,costamere,CC,hypergeometric,exon
GO:0045837,0.0567085734631531,0.993701030255671,2,15,negative regulation of membrane potential,BP,hypergeometric,exon
GO:1903428,0.0567085734631531,0.993701030255671,2,15,positive regulation of reactive oxygen species biosynthetic process,BP,hypergeometric,exon
GO:1990403,0.0567085734631531,0.993701030255671,2,15,embryonic brain development,BP,hypergeometric,exon
GO:2001171,0.0567085734631531,0.993701030255671,2,15,positive regulation of ATP biosynthetic process,BP,hypergeometric,exon
GO:0006354,0.0573110601076864,0.982170554732575,5,80,"DNA-templated transcription, elongation",BP,hypergeometric,exon
GO:0016363,0.0573110601076864,0.982170554732575,5,80,nuclear matrix,CC,hypergeometric,exon
GO:0046324,0.0575525647193988,0.985025733499123,4,56,regulation of glucose import,BP,hypergeometric,exon
GO:0000803,0.0577393714775077,0.988706976145322,3,34,sex chromosome,CC,hypergeometric,exon
GO:0030488,0.0577393714775077,0.988706976145322,3,34,tRNA methylation,BP,hypergeometric,exon
GO:2000463,0.0577393714775077,0.988706976145322,3,34,positive regulation of excitatory postsynaptic potential,BP,hypergeometric,exon
GO:0005814,0.0583131495776449,0.979342401380974,6,106,centriole,CC,hypergeometric,exon
GO:0006996,0.05852369122072,0.954671839308918,91,3007,organelle organization,BP,hypergeometric,exon
GO:0007411,0.0590617140448425,0.973758280765176,9,189,axon guidance,BP,hypergeometric,exon
GO:0140657,0.0600611468559888,0.965251329075425,18,464,ATP-dependent activity,MF,hypergeometric,exon
GO:0097485,0.0606516647223518,0.972913960691736,9,190,neuron projection guidance,BP,hypergeometric,exon
GO:0098839,0.0606829914571842,0.983925589556257,4,57,postsynaptic density membrane,CC,hypergeometric,exon
GO:0098794,0.0616766775535664,0.96262066046819,21,562,postsynapse,CC,hypergeometric,exon
GO:0043168,0.0629783172520111,0.953344898362924,59,1866,anion binding,MF,hypergeometric,exon
GO:0005839,0.0637233946234579,0.99239517465898,2,16,proteasome core complex,CC,hypergeometric,exon
GO:0006089,0.0637233946234579,0.99239517465898,2,16,lactate metabolic process,BP,hypergeometric,exon
GO:0016973,0.0637233946234579,0.99239517465898,2,16,poly(A)+ mRNA export from nucleus,BP,hypergeometric,exon
GO:0032703,0.0637233946234579,0.99239517465898,2,16,negative regulation of interleukin-2 production,BP,hypergeometric,exon
GO:0035458,0.0637233946234579,0.99239517465898,2,16,cellular response to interferon-beta,BP,hypergeometric,exon
GO:0035994,0.0637233946234579,0.99239517465898,2,16,response to muscle stretch,BP,hypergeometric,exon
GO:0040033,0.0637233946234579,0.99239517465898,2,16,"negative regulation of translation, ncRNA-mediated",BP,hypergeometric,exon
GO:0043138,0.0637233946234579,0.99239517465898,2,16,3'-5' DNA helicase activity,MF,hypergeometric,exon
GO:0045974,0.0637233946234579,0.99239517465898,2,16,"regulation of translation, ncRNA-mediated",BP,hypergeometric,exon
GO:0060221,0.0637233946234579,0.99239517465898,2,16,retinal rod cell differentiation,BP,hypergeometric,exon
GO:0060314,0.0637233946234579,0.99239517465898,2,16,regulation of ryanodine-sensitive calcium-release channel activity,BP,hypergeometric,exon
GO:0080111,0.0637233946234579,0.99239517465898,2,16,DNA demethylation,BP,hypergeometric,exon
GO:0099623,0.0637233946234579,0.99239517465898,2,16,regulation of cardiac muscle cell membrane repolarization,BP,hypergeometric,exon
GO:2000232,0.0637233946234579,0.99239517465898,2,16,regulation of rRNA processing,BP,hypergeometric,exon
GO:0003682,0.0648472406874083,0.960981126147676,20,533,chromatin binding,MF,hypergeometric,exon
GO:0006479,0.0649390846542064,0.972237194948194,8,164,protein methylation,BP,hypergeometric,exon
GO:0008213,0.0649390846542064,0.972237194948194,8,164,protein alkylation,BP,hypergeometric,exon
GO:0043949,0.0663634648999761,0.986225215708812,3,36,regulation of cAMP-mediated signaling,BP,hypergeometric,exon
GO:0061028,0.0663634648999761,0.986225215708812,3,36,establishment of endothelial barrier,BP,hypergeometric,exon
GO:0070192,0.0672087604558909,0.981566741877339,4,59,chromosome organization involved in meiotic cell cycle,BP,hypergeometric,exon
GO:0008236,0.0678086563652556,0.977857348219367,5,84,serine-type peptidase activity,MF,hypergeometric,exon
GO:1904019,0.0678086563652556,0.977857348219367,5,84,epithelial cell apoptotic process,BP,hypergeometric,exon
GO:0000785,0.0683260029319684,0.959818007838542,18,472,chromatin,CC,hypergeometric,exon
GO:0031267,0.0686547122329833,0.965794981391293,11,254,small GTPase binding,MF,hypergeometric,exon
GO:0000502,0.0706026865275005,0.980306204546643,4,60,proteasome complex,CC,hypergeometric,exon
GO:0006998,0.070883589669976,0.984864615826689,3,37,nuclear envelope organization,BP,hypergeometric,exon
GO:0016514,0.0710120240017642,0.990941325713839,2,17,SWI/SNF complex,CC,hypergeometric,exon
GO:0030506,0.0710120240017642,0.990941325713839,2,17,ankyrin binding,MF,hypergeometric,exon
GO:0030810,0.0710120240017642,0.990941325713839,2,17,positive regulation of nucleotide biosynthetic process,BP,hypergeometric,exon
GO:0042438,0.0710120240017642,0.990941325713839,2,17,melanin biosynthetic process,BP,hypergeometric,exon
GO:0044550,0.0710120240017642,0.990941325713839,2,17,secondary metabolite biosynthetic process,BP,hypergeometric,exon
GO:0051043,0.0710120240017642,0.990941325713839,2,17,regulation of membrane protein ectodomain proteolysis,BP,hypergeometric,exon
GO:0098831,0.0710120240017642,0.990941325713839,2,17,presynaptic active zone cytoplasmic component,CC,hypergeometric,exon
GO:0098974,0.0710120240017642,0.990941325713839,2,17,postsynaptic actin cytoskeleton organization,BP,hypergeometric,exon
GO:0099188,0.0710120240017642,0.990941325713839,2,17,postsynaptic cytoskeleton organization,BP,hypergeometric,exon
GO:0099558,0.0710120240017642,0.990941325713839,2,17,maintenance of synapse structure,BP,hypergeometric,exon
GO:1900373,0.0710120240017642,0.990941325713839,2,17,positive regulation of purine nucleotide biosynthetic process,BP,hypergeometric,exon
GO:1904889,0.0710120240017642,0.990941325713839,2,17,regulation of excitatory synapse assembly,BP,hypergeometric,exon
GO:0006807,0.0732543832240926,0.940358335992808,193,6871,nitrogen compound metabolic process,BP,hypergeometric,exon
GO:0032922,0.0740829058609784,0.978990438974559,4,61,circadian regulation of gene expression,BP,hypergeometric,exon
GO:0043043,0.0743518263099467,0.95394249044097,21,575,peptide biosynthetic process,BP,hypergeometric,exon
GO:0043292,0.0744885517012111,0.967218688369049,8,169,contractile fiber,CC,hypergeometric,exon
GO:0030017,0.07541289051752,0.968897713183494,7,141,sarcomere,CC,hypergeometric,exon
GO:0032501,0.0755042930025938,0.938824778687577,144,5014,multicellular organismal process,BP,hypergeometric,exon
GO:0001754,0.0755383689550381,0.983422168655748,3,38,eye photoreceptor cell differentiation,BP,hypergeometric,exon
GO:0032663,0.0755383689550381,0.983422168655748,3,38,regulation of interleukin-2 production,BP,hypergeometric,exon
GO:0000494,0.0760493044233809,0.998009352815252,1,3,box C/D RNA 3'-end processing,BP,hypergeometric,exon
GO:0000706,0.0760493044233809,0.998009352815252,1,3,meiotic DNA double-strand break processing,BP,hypergeometric,exon
GO:0000827,0.0760493044233809,0.998009352815252,1,3,"inositol-1,3,4,5,6-pentakisphosphate kinase activity",MF,hypergeometric,exon
GO:0001408,0.0760493044233809,0.998009352815252,1,3,guanine nucleotide transport,BP,hypergeometric,exon
GO:0002361,0.0760493044233809,0.998009352815252,1,3,"CD4-positive, CD25-positive, alpha-beta regulatory T cell differentiation",BP,hypergeometric,exon
GO:0004104,0.0760493044233809,0.998009352815252,1,3,cholinesterase activity,MF,hypergeometric,exon
GO:0004185,0.0760493044233809,0.998009352815252,1,3,serine-type carboxypeptidase activity,MF,hypergeometric,exon
GO:0004305,0.0760493044233809,0.998009352815252,1,3,ethanolamine kinase activity,MF,hypergeometric,exon
GO:0004416,0.0760493044233809,0.998009352815252,1,3,hydroxyacylglutathione hydrolase activity,MF,hypergeometric,exon
GO:0004470,0.0760493044233809,0.998009352815252,1,3,malic enzyme activity,MF,hypergeometric,exon
GO:0004471,0.0760493044233809,0.998009352815252,1,3,malate dehydrogenase (decarboxylating) (NAD+) activity,MF,hypergeometric,exon
GO:0004473,0.0760493044233809,0.998009352815252,1,3,malate dehydrogenase (decarboxylating) (NADP+) activity,MF,hypergeometric,exon
GO:0004667,0.0760493044233809,0.998009352815252,1,3,prostaglandin-D synthase activity,MF,hypergeometric,exon
GO:0004814,0.0760493044233809,0.998009352815252,1,3,arginine-tRNA ligase activity,MF,hypergeometric,exon
GO:0006420,0.0760493044233809,0.998009352815252,1,3,arginyl-tRNA aminoacylation,BP,hypergeometric,exon
GO:0006657,0.0760493044233809,0.998009352815252,1,3,CDP-choline pathway,BP,hypergeometric,exon
GO:0007525,0.0760493044233809,0.998009352815252,1,3,somatic muscle development,BP,hypergeometric,exon
GO:0009374,0.0760493044233809,0.998009352815252,1,3,biotin binding,MF,hypergeometric,exon
GO:0010525,0.0760493044233809,0.998009352815252,1,3,"regulation of transposition, RNA-mediated",BP,hypergeometric,exon
GO:0010526,0.0760493044233809,0.998009352815252,1,3,"negative regulation of transposition, RNA-mediated",BP,hypergeometric,exon
GO:0010754,0.0760493044233809,0.998009352815252,1,3,negative regulation of cGMP-mediated signaling,BP,hypergeometric,exon
GO:0010961,0.0760493044233809,0.998009352815252,1,3,cellular magnesium ion homeostasis,BP,hypergeometric,exon
GO:0014016,0.0760493044233809,0.998009352815252,1,3,neuroblast differentiation,BP,hypergeometric,exon
GO:0014722,0.0760493044233809,0.998009352815252,1,3,regulation of skeletal muscle contraction by calcium ion signaling,BP,hypergeometric,exon
GO:0014852,0.0760493044233809,0.998009352815252,1,3,regulation of skeletal muscle contraction by neural stimulation via neuromuscular junction,BP,hypergeometric,exon
GO:0015825,0.0760493044233809,0.998009352815252,1,3,L-serine transport,BP,hypergeometric,exon
GO:0019002,0.0760493044233809,0.998009352815252,1,3,GMP binding,MF,hypergeometric,exon
GO:0019086,0.0760493044233809,0.998009352815252,1,3,late viral transcription,BP,hypergeometric,exon
GO:0019236,0.0760493044233809,0.998009352815252,1,3,response to pheromone,BP,hypergeometric,exon
GO:0019243,0.0760493044233809,0.998009352815252,1,3,methylglyoxal catabolic process to D-lactate via S-lactoyl-glutathione,BP,hypergeometric,exon
GO:0021817,0.0760493044233809,0.998009352815252,1,3,nucleokinesis involved in cell motility in cerebral cortex radial glia guided migration,BP,hypergeometric,exon
GO:0030070,0.0760493044233809,0.998009352815252,1,3,insulin processing,BP,hypergeometric,exon
GO:0030860,0.0760493044233809,0.998009352815252,1,3,regulation of polarized epithelial cell differentiation,BP,hypergeometric,exon
GO:0031021,0.0760493044233809,0.998009352815252,1,3,interphase microtubule organizing center,CC,hypergeometric,exon
GO:0031871,0.0760493044233809,0.998009352815252,1,3,proteinase activated receptor binding,MF,hypergeometric,exon
GO:0032027,0.0760493044233809,0.998009352815252,1,3,myosin light chain binding,MF,hypergeometric,exon
GO:0032197,0.0760493044233809,0.998009352815252,1,3,"transposition, RNA-mediated",BP,hypergeometric,exon
GO:0032849,0.0760493044233809,0.998009352815252,1,3,positive regulation of cellular pH reduction,BP,hypergeometric,exon
GO:0033967,0.0760493044233809,0.998009352815252,1,3,box C/D RNA metabolic process,BP,hypergeometric,exon
GO:0034398,0.0760493044233809,0.998009352815252,1,3,telomere tethering at nuclear periphery,BP,hypergeometric,exon
GO:0034775,0.0760493044233809,0.998009352815252,1,3,glutathione transmembrane transport,BP,hypergeometric,exon
GO:0034963,0.0760493044233809,0.998009352815252,1,3,box C/D RNA processing,BP,hypergeometric,exon
GO:0035443,0.0760493044233809,0.998009352815252,1,3,tripeptide transmembrane transport,BP,hypergeometric,exon
GO:0035552,0.0760493044233809,0.998009352815252,1,3,oxidative single-stranded DNA demethylation,BP,hypergeometric,exon
GO:0036009,0.0760493044233809,0.998009352815252,1,3,protein-glutamine N-methyltransferase activity,MF,hypergeometric,exon
GO:0042585,0.0760493044233809,0.998009352815252,1,3,germinal vesicle,CC,hypergeometric,exon
GO:0043578,0.0760493044233809,0.998009352815252,1,3,nuclear matrix organization,BP,hypergeometric,exon
GO:0044614,0.0760493044233809,0.998009352815252,1,3,nuclear pore cytoplasmic filaments,CC,hypergeometric,exon
GO:0044821,0.0760493044233809,0.998009352815252,1,3,meiotic telomere tethering at nuclear periphery,BP,hypergeometric,exon
GO:0048790,0.0760493044233809,0.998009352815252,1,3,maintenance of presynaptic active zone structure,BP,hypergeometric,exon
GO:0048793,0.0760493044233809,0.998009352815252,1,3,pronephros development,BP,hypergeometric,exon
GO:0050265,0.0760493044233809,0.998009352815252,1,3,RNA uridylyltransferase activity,MF,hypergeometric,exon
GO:0051916,0.0760493044233809,0.998009352815252,1,3,granulocyte colony-stimulating factor binding,MF,hypergeometric,exon
GO:0052723,0.0760493044233809,0.998009352815252,1,3,inositol hexakisphosphate 1-kinase activity,MF,hypergeometric,exon
GO:0052724,0.0760493044233809,0.998009352815252,1,3,inositol hexakisphosphate 3-kinase activity,MF,hypergeometric,exon
GO:0060066,0.0760493044233809,0.998009352815252,1,3,oviduct development,BP,hypergeometric,exon
GO:0060708,0.0760493044233809,0.998009352815252,1,3,spongiotrophoblast differentiation,BP,hypergeometric,exon
GO:0060819,0.0760493044233809,0.998009352815252,1,3,inactivation of X chromosome by genetic imprinting,BP,hypergeometric,exon
GO:0061847,0.0760493044233809,0.998009352815252,1,3,response to cholecystokinin,BP,hypergeometric,exon
GO:0065001,0.0760493044233809,0.998009352815252,1,3,specification of axis polarity,BP,hypergeometric,exon
GO:0070197,0.0760493044233809,0.998009352815252,1,3,meiotic attachment of telomere to nuclear envelope,BP,hypergeometric,exon
GO:0070315,0.0760493044233809,0.998009352815252,1,3,G1 to G0 transition involved in cell differentiation,BP,hypergeometric,exon
GO:0070346,0.0760493044233809,0.998009352815252,1,3,positive regulation of fat cell proliferation,BP,hypergeometric,exon
GO:0070682,0.0760493044233809,0.998009352815252,1,3,proteasome regulatory particle assembly,BP,hypergeometric,exon
GO:0070729,0.0760493044233809,0.998009352815252,1,3,cyclic nucleotide transport,BP,hypergeometric,exon
GO:0070966,0.0760493044233809,0.998009352815252,1,3,"nuclear-transcribed mRNA catabolic process, no-go decay",BP,hypergeometric,exon
GO:0090292,0.0760493044233809,0.998009352815252,1,3,nuclear matrix anchoring at nuclear membrane,BP,hypergeometric,exon
GO:0097010,0.0760493044233809,0.998009352815252,1,3,eukaryotic translation initiation factor 4F complex assembly,BP,hypergeometric,exon
GO:0097363,0.0760493044233809,0.998009352815252,1,3,protein O-GlcNAc transferase activity,MF,hypergeometric,exon
GO:0098582,0.0760493044233809,0.998009352815252,1,3,innate vocalization behavior,BP,hypergeometric,exon
GO:0098683,0.0760493044233809,0.998009352815252,1,3,cochlear hair cell ribbon synapse,CC,hypergeometric,exon
GO:0099029,0.0760493044233809,0.998009352815252,1,3,anchored component of presynaptic active zone membrane,CC,hypergeometric,exon
GO:0099053,0.0760493044233809,0.998009352815252,1,3,activating signal cointegrator 1 complex,CC,hypergeometric,exon
GO:0099575,0.0760493044233809,0.998009352815252,1,3,"regulation of protein catabolic process at presynapse, modulating synaptic transmission",BP,hypergeometric,exon
GO:0099617,0.0760493044233809,0.998009352815252,1,3,matrix side of mitochondrial inner membrane,CC,hypergeometric,exon
GO:0101030,0.0760493044233809,0.998009352815252,1,3,tRNA-guanine transglycosylation,BP,hypergeometric,exon
GO:0120200,0.0760493044233809,0.998009352815252,1,3,rod photoreceptor outer segment,CC,hypergeometric,exon
GO:0140285,0.0760493044233809,0.998009352815252,1,3,endosome fission,BP,hypergeometric,exon
GO:1900095,0.0760493044233809,0.998009352815252,1,3,regulation of dosage compensation by inactivation of X chromosome,BP,hypergeometric,exon
GO:1900169,0.0760493044233809,0.998009352815252,1,3,regulation of glucocorticoid mediated signaling pathway,BP,hypergeometric,exon
GO:1900275,0.0760493044233809,0.998009352815252,1,3,negative regulation of phospholipase C activity,BP,hypergeometric,exon
GO:1901078,0.0760493044233809,0.998009352815252,1,3,negative regulation of relaxation of muscle,BP,hypergeometric,exon
GO:1901844,0.0760493044233809,0.998009352815252,1,3,regulation of cell communication by electrical coupling involved in cardiac conduction,BP,hypergeometric,exon
GO:1901993,0.0760493044233809,0.998009352815252,1,3,regulation of meiotic cell cycle phase transition,BP,hypergeometric,exon
GO:1902037,0.0760493044233809,0.998009352815252,1,3,negative regulation of hematopoietic stem cell differentiation,BP,hypergeometric,exon
GO:1902523,0.0760493044233809,0.998009352815252,1,3,positive regulation of protein K63-linked ubiquitination,BP,hypergeometric,exon
GO:1902775,0.0760493044233809,0.998009352815252,1,3,mitochondrial large ribosomal subunit assembly,BP,hypergeometric,exon
GO:1903237,0.0760493044233809,0.998009352815252,1,3,negative regulation of leukocyte tethering or rolling,BP,hypergeometric,exon
GO:1903347,0.0760493044233809,0.998009352815252,1,3,negative regulation of bicellular tight junction assembly,BP,hypergeometric,exon
GO:1905696,0.0760493044233809,0.998009352815252,1,3,regulation of polysome binding,BP,hypergeometric,exon
GO:1905937,0.0760493044233809,0.998009352815252,1,3,negative regulation of germ cell proliferation,BP,hypergeometric,exon
GO:2000170,0.0760493044233809,0.998009352815252,1,3,positive regulation of peptidyl-cysteine S-nitrosylation,BP,hypergeometric,exon
GO:2000255,0.0760493044233809,0.998009352815252,1,3,negative regulation of male germ cell proliferation,BP,hypergeometric,exon
GO:2000627,0.0760493044233809,0.998009352815252,1,3,positive regulation of miRNA catabolic process,BP,hypergeometric,exon
GO:0006518,0.0769280028236428,0.950131120125875,25,710,peptide metabolic process,BP,hypergeometric,exon
GO:0006405,0.077648529323667,0.977618634348007,4,62,RNA export from nucleus,BP,hypergeometric,exon
GO:0050954,0.0776512442574225,0.967755360180603,7,142,sensory perception of mechanical stimulus,BP,hypergeometric,exon
GO:0006448,0.0785555523427922,0.98933620272646,2,18,regulation of translational elongation,BP,hypergeometric,exon
GO:0010801,0.0785555523427922,0.98933620272646,2,18,negative regulation of peptidyl-threonine phosphorylation,BP,hypergeometric,exon
GO:0030552,0.0785555523427922,0.98933620272646,2,18,cAMP binding,MF,hypergeometric,exon
GO:0046325,0.0785555523427922,0.98933620272646,2,18,negative regulation of glucose import,BP,hypergeometric,exon
GO:0046965,0.0785555523427922,0.98933620272646,2,18,retinoid X receptor binding,MF,hypergeometric,exon
GO:0050901,0.0785555523427922,0.98933620272646,2,18,leukocyte tethering or rolling,BP,hypergeometric,exon
GO:0051307,0.0785555523427922,0.98933620272646,2,18,meiotic chromosome separation,BP,hypergeometric,exon
GO:0099150,0.0785555523427922,0.98933620272646,2,18,regulation of postsynaptic specialization assembly,BP,hypergeometric,exon
GO:1900543,0.0785555523427922,0.98933620272646,2,18,negative regulation of purine nucleotide metabolic process,BP,hypergeometric,exon
GO:2000001,0.0785555523427922,0.98933620272646,2,18,regulation of DNA damage checkpoint,BP,hypergeometric,exon
GO:0017171,0.0793010076159029,0.972890531419964,5,88,serine hydrolase activity,MF,hypergeometric,exon
GO:0008235,0.0803246077105215,0.981896496110762,3,39,metalloexopeptidase activity,MF,hypergeometric,exon
GO:0043167,0.0804525879968697,0.935229978847941,120,4127,ion binding,MF,hypergeometric,exon
GO:0019935,0.0812986007098743,0.97619002362289,4,63,cyclic-nucleotide-mediated signaling,BP,hypergeometric,exon
GO:0043113,0.0812986007098743,0.97619002362289,4,63,receptor clustering,BP,hypergeometric,exon
GO:0051130,0.0816269643201531,0.94399167767031,32,952,positive regulation of cellular component organization,BP,hypergeometric,exon
GO:0007189,0.0823274154537272,0.971542644059546,5,89,adenylate cyclase-activating G protein-coupled receptor signaling pathway,BP,hypergeometric,exon
GO:0031252,0.0838698729710813,0.952959176937017,14,357,cell leading edge,CC,hypergeometric,exon
GO:0071426,0.0850320996997992,0.974703884138999,4,64,ribonucleoprotein complex export from nucleus,BP,hypergeometric,exon
GO:0071709,0.0852390087267301,0.980286338156052,3,40,membrane assembly,BP,hypergeometric,exon
GO:0099056,0.0852390087267301,0.980286338156052,3,40,integral component of presynaptic membrane,CC,hypergeometric,exon
GO:0045185,0.0854143992058854,0.970151308332962,5,90,maintenance of protein location,BP,hypergeometric,exon
GO:0045211,0.0856437983638937,0.957250185038269,10,234,postsynaptic membrane,CC,hypergeometric,exon
GO:0048588,0.0856437983638937,0.957250185038269,10,234,developmental cell growth,BP,hypergeometric,exon
GO:0006349,0.0863358642954919,0.987577099255155,2,19,regulation of gene expression by genetic imprinting,BP,hypergeometric,exon
GO:0006582,0.0863358642954919,0.987577099255155,2,19,melanin metabolic process,BP,hypergeometric,exon
GO:0006862,0.0863358642954919,0.987577099255155,2,19,nucleotide transport,BP,hypergeometric,exon
GO:0015215,0.0863358642954919,0.987577099255155,2,19,nucleotide transmembrane transporter activity,MF,hypergeometric,exon
GO:0043194,0.0863358642954919,0.987577099255155,2,19,axon initial segment,CC,hypergeometric,exon
GO:0045292,0.0863358642954919,0.987577099255155,2,19,"mRNA cis splicing, via spliceosome",BP,hypergeometric,exon
GO:0045815,0.0863358642954919,0.987577099255155,2,19,"positive regulation of gene expression, epigenetic",BP,hypergeometric,exon
GO:0045980,0.0863358642954919,0.987577099255155,2,19,negative regulation of nucleotide metabolic process,BP,hypergeometric,exon
GO:0099622,0.0863358642954919,0.987577099255155,2,19,cardiac muscle cell membrane repolarization,BP,hypergeometric,exon
GO:0007186,0.086472372672805,0.948376551890989,17,455,G protein-coupled receptor signaling pathway,BP,hypergeometric,exon
GO:0008238,0.088847944804228,0.97315953814274,4,65,exopeptidase activity,MF,hypergeometric,exon
GO:0071166,0.088847944804228,0.97315953814274,4,65,ribonucleoprotein complex localization,BP,hypergeometric,exon
GO:0045664,0.0892113240992952,0.959184645901408,8,176,regulation of neuron differentiation,BP,hypergeometric,exon
GO:0001941,0.0902781846073651,0.97859055242798,3,41,postsynaptic membrane organization,BP,hypergeometric,exon
GO:0005245,0.0902781846073651,0.97859055242798,3,41,voltage-gated calcium channel activity,MF,hypergeometric,exon
GO:0031062,0.0902781846073651,0.97859055242798,3,41,positive regulation of histone methylation,BP,hypergeometric,exon
GO:0032391,0.0902781846073651,0.97859055242798,3,41,photoreceptor connecting cilium,CC,hypergeometric,exon
GO:0007409,0.0913535344726382,0.946981079840025,15,394,axonogenesis,BP,hypergeometric,exon
GO:0022613,0.0913535344726382,0.946981079840025,15,394,ribonucleoprotein complex biogenesis,BP,hypergeometric,exon
GO:0003015,0.0914432120650506,0.957937309177289,8,177,heart process,BP,hypergeometric,exon
GO:0000049,0.0927449962896873,0.971556353220393,4,66,tRNA binding,MF,hypergeometric,exon
GO:0010827,0.0927449962896873,0.971556353220393,4,66,regulation of glucose transmembrane transport,BP,hypergeometric,exon
GO:0035869,0.0927449962896873,0.971556353220393,4,66,ciliary transition zone,CC,hypergeometric,exon
GO:0046323,0.0927449962896873,0.971556353220393,4,66,glucose import,BP,hypergeometric,exon
GO:0098982,0.0927449962896873,0.971556353220393,4,66,GABA-ergic synapse,CC,hypergeometric,exon
GO:1900542,0.0927449962896873,0.971556353220393,4,66,regulation of purine nucleotide metabolic process,BP,hypergeometric,exon
GO:0005912,0.0931609351539731,0.962759465913196,6,120,adherens junction,CC,hypergeometric,exon
GO:0050877,0.0934890042851579,0.936627442807131,28,828,nervous system process,BP,hypergeometric,exon
GO:0010528,0.0943356100862568,0.985661847821392,2,20,regulation of transposition,BP,hypergeometric,exon
GO:0010529,0.0943356100862568,0.985661847821392,2,20,negative regulation of transposition,BP,hypergeometric,exon
GO:0010880,0.0943356100862568,0.985661847821392,2,20,regulation of release of sequestered calcium ion into cytosol by sarcoplasmic reticulum,BP,hypergeometric,exon
GO:0034389,0.0943356100862568,0.985661847821392,2,20,lipid droplet organization,BP,hypergeometric,exon
GO:0035145,0.0943356100862568,0.985661847821392,2,20,exon-exon junction complex,CC,hypergeometric,exon
GO:0051393,0.0943356100862568,0.985661847821392,2,20,alpha-actinin binding,MF,hypergeometric,exon
GO:0060080,0.0943356100862568,0.985661847821392,2,20,inhibitory postsynaptic potential,BP,hypergeometric,exon
GO:0060563,0.0943356100862568,0.985661847821392,2,20,neuroepithelial cell differentiation,BP,hypergeometric,exon
GO:0097107,0.0943356100862568,0.985661847821392,2,20,postsynaptic density assembly,BP,hypergeometric,exon
GO:0043021,0.0943933743679976,0.958951083545015,7,149,ribonucleoprotein complex binding,MF,hypergeometric,exon
GO:0006412,0.0949425915825119,0.940129723512275,20,560,translation,BP,hypergeometric,exon
GO:0000266,0.0954386690815503,0.976808113557043,3,42,mitochondrial fission,BP,hypergeometric,exon
GO:0006111,0.0954386690815503,0.976808113557043,3,42,regulation of gluconeogenesis,BP,hypergeometric,exon
GO:0007129,0.0954386690815503,0.976808113557043,3,42,homologous chromosome pairing at meiosis,BP,hypergeometric,exon
GO:0036094,0.0964490671619834,0.92638646103259,59,1921,small molecule binding,MF,hypergeometric,exon
GO:0006140,0.0967220590791722,0.969893742644699,4,67,regulation of nucleotide metabolic process,BP,hypergeometric,exon
GO:0017148,0.0969372829701064,0.957575044217938,7,150,negative regulation of translation,BP,hypergeometric,exon
GO:0098813,0.0982260512753582,0.95173180478964,9,210,nuclear chromosome segregation,BP,hypergeometric,exon
GO:0003008,0.0994392048067,0.927555629588135,41,1285,system process,BP,hypergeometric,exon
GO:0000243,0.100094823163745,0.996087251797712,1,4,commitment complex,CC,hypergeometric,exon
GO:0000822,0.100094823163745,0.996087251797712,1,4,inositol hexakisphosphate binding,MF,hypergeometric,exon
GO:0000832,0.100094823163745,0.996087251797712,1,4,inositol hexakisphosphate 5-kinase activity,MF,hypergeometric,exon
GO:0002155,0.100094823163745,0.996087251797712,1,4,regulation of thyroid hormone mediated signaling pathway,BP,hypergeometric,exon
GO:0003062,0.100094823163745,0.996087251797712,1,4,regulation of heart rate by chemical signal,BP,hypergeometric,exon
GO:0004691,0.100094823163745,0.996087251797712,1,4,cAMP-dependent protein kinase activity,MF,hypergeometric,exon
GO:0005519,0.100094823163745,0.996087251797712,1,4,cytoskeletal regulatory protein binding,MF,hypergeometric,exon
GO:0006598,0.100094823163745,0.996087251797712,1,4,polyamine catabolic process,BP,hypergeometric,exon
GO:0006868,0.100094823163745,0.996087251797712,1,4,glutamine transport,BP,hypergeometric,exon
GO:0008948,0.100094823163745,0.996087251797712,1,4,oxaloacetate decarboxylase activity,MF,hypergeometric,exon
GO:0009214,0.100094823163745,0.996087251797712,1,4,cyclic nucleotide catabolic process,BP,hypergeometric,exon
GO:0014022,0.100094823163745,0.996087251797712,1,4,neural plate elongation,BP,hypergeometric,exon
GO:0015194,0.100094823163745,0.996087251797712,1,4,L-serine transmembrane transporter activity,MF,hypergeometric,exon
GO:0016560,0.100094823163745,0.996087251797712,1,4,"protein import into peroxisome matrix, docking",BP,hypergeometric,exon
GO:0019828,0.100094823163745,0.996087251797712,1,4,aspartic-type endopeptidase inhibitor activity,MF,hypergeometric,exon
GO:0021553,0.100094823163745,0.996087251797712,1,4,olfactory nerve development,BP,hypergeometric,exon
GO:0021815,0.100094823163745,0.996087251797712,1,4,modulation of microtubule cytoskeleton involved in cerebral cortex radial glia guided migration,BP,hypergeometric,exon
GO:0022007,0.100094823163745,0.996087251797712,1,4,convergent extension involved in neural plate elongation,BP,hypergeometric,exon
GO:0030473,0.100094823163745,0.996087251797712,1,4,nuclear migration along microtubule,BP,hypergeometric,exon
GO:0032911,0.100094823163745,0.996087251797712,1,4,negative regulation of transforming growth factor beta1 production,BP,hypergeometric,exon
GO:0032979,0.100094823163745,0.996087251797712,1,4,protein insertion into mitochondrial inner membrane from matrix,BP,hypergeometric,exon
GO:0034634,0.100094823163745,0.996087251797712,1,4,glutathione transmembrane transporter activity,MF,hypergeometric,exon
GO:0034729,0.100094823163745,0.996087251797712,1,4,histone H3-K79 methylation,BP,hypergeometric,exon
GO:0034739,0.100094823163745,0.996087251797712,1,4,histone deacetylase activity (H4-K16 specific),MF,hypergeometric,exon
GO:0035363,0.100094823163745,0.996087251797712,1,4,histone locus body,CC,hypergeometric,exon
GO:0035511,0.100094823163745,0.996087251797712,1,4,oxidative DNA demethylation,BP,hypergeometric,exon
GO:0035516,0.100094823163745,0.996087251797712,1,4,oxidative DNA demethylase activity,MF,hypergeometric,exon
GO:0035521,0.100094823163745,0.996087251797712,1,4,monoubiquitinated histone deubiquitination,BP,hypergeometric,exon
GO:0035522,0.100094823163745,0.996087251797712,1,4,monoubiquitinated histone H2A deubiquitination,BP,hypergeometric,exon
GO:0042937,0.100094823163745,0.996087251797712,1,4,tripeptide transmembrane transporter activity,MF,hypergeometric,exon
GO:0043402,0.100094823163745,0.996087251797712,1,4,glucocorticoid mediated signaling pathway,BP,hypergeometric,exon
GO:0044027,0.100094823163745,0.996087251797712,1,4,hypermethylation of CpG island,BP,hypergeometric,exon
GO:0044771,0.100094823163745,0.996087251797712,1,4,meiotic cell cycle phase transition,BP,hypergeometric,exon
GO:0045213,0.100094823163745,0.996087251797712,1,4,neurotransmitter receptor metabolic process,BP,hypergeometric,exon
GO:0045829,0.100094823163745,0.996087251797712,1,4,negative regulation of isotype switching,BP,hypergeometric,exon
GO:0048936,0.100094823163745,0.996087251797712,1,4,peripheral nervous system neuron axonogenesis,BP,hypergeometric,exon
GO:0050833,0.100094823163745,0.996087251797712,1,4,pyruvate transmembrane transporter activity,MF,hypergeometric,exon
GO:0051081,0.100094823163745,0.996087251797712,1,4,nuclear membrane disassembly,BP,hypergeometric,exon
GO:0051461,0.100094823163745,0.996087251797712,1,4,positive regulation of corticotropin secretion,BP,hypergeometric,exon
GO:0051596,0.100094823163745,0.996087251797712,1,4,methylglyoxal catabolic process,BP,hypergeometric,exon
GO:0060372,0.100094823163745,0.996087251797712,1,4,regulation of atrial cardiac muscle cell membrane repolarization,BP,hypergeometric,exon
GO:0061642,0.100094823163745,0.996087251797712,1,4,chemoattraction of axon,BP,hypergeometric,exon
GO:0061727,0.100094823163745,0.996087251797712,1,4,methylglyoxal catabolic process to lactate,BP,hypergeometric,exon
GO:0061945,0.100094823163745,0.996087251797712,1,4,regulation of protein K48-linked ubiquitination,BP,hypergeometric,exon
GO:0070358,0.100094823163745,0.996087251797712,1,4,actin polymerization-dependent cell motility,BP,hypergeometric,exon
GO:0070579,0.100094823163745,0.996087251797712,1,4,methylcytosine dioxygenase activity,MF,hypergeometric,exon
GO:0071076,0.100094823163745,0.996087251797712,1,4,RNA 3' uridylation,BP,hypergeometric,exon
GO:0086046,0.100094823163745,0.996087251797712,1,4,membrane depolarization during SA node cell action potential,BP,hypergeometric,exon
GO:0097118,0.100094823163745,0.996087251797712,1,4,neuroligin clustering involved in postsynaptic membrane assembly,BP,hypergeometric,exon
GO:0097343,0.100094823163745,0.996087251797712,1,4,ripoptosome assembly,BP,hypergeometric,exon
GO:0140284,0.100094823163745,0.996087251797712,1,4,endoplasmic reticulum-endosome membrane contact site,CC,hypergeometric,exon
GO:1900149,0.100094823163745,0.996087251797712,1,4,positive regulation of Schwann cell migration,BP,hypergeometric,exon
GO:1900208,0.100094823163745,0.996087251797712,1,4,regulation of cardiolipin metabolic process,BP,hypergeometric,exon
GO:1901026,0.100094823163745,0.996087251797712,1,4,ripoptosome assembly involved in necroptotic process,BP,hypergeometric,exon
GO:1902897,0.100094823163745,0.996087251797712,1,4,regulation of postsynaptic density protein 95 clustering,BP,hypergeometric,exon
GO:1903373,0.100094823163745,0.996087251797712,1,4,positive regulation of endoplasmic reticulum tubular network organization,BP,hypergeometric,exon
GO:1903546,0.100094823163745,0.996087251797712,1,4,protein localization to photoreceptor outer segment,BP,hypergeometric,exon
GO:1903842,0.100094823163745,0.996087251797712,1,4,response to arsenite ion,BP,hypergeometric,exon
GO:1903843,0.100094823163745,0.996087251797712,1,4,cellular response to arsenite ion,BP,hypergeometric,exon
GO:1904879,0.100094823163745,0.996087251797712,1,4,positive regulation of calcium ion transmembrane transport via high voltage-gated calcium channel,BP,hypergeometric,exon
GO:1904995,0.100094823163745,0.996087251797712,1,4,negative regulation of leukocyte adhesion to vascular endothelial cell,BP,hypergeometric,exon
GO:1905205,0.100094823163745,0.996087251797712,1,4,positive regulation of connective tissue replacement,BP,hypergeometric,exon
GO:1990935,0.100094823163745,0.996087251797712,1,4,splicing factor binding,MF,hypergeometric,exon
GO:2000625,0.100094823163745,0.996087251797712,1,4,regulation of miRNA catabolic process,BP,hypergeometric,exon
GO:2000676,0.100094823163745,0.996087251797712,1,4,positive regulation of type B pancreatic cell apoptotic process,BP,hypergeometric,exon
GO:2001170,0.100094823163745,0.996087251797712,1,4,negative regulation of ATP biosynthetic process,BP,hypergeometric,exon
GO:0018024,0.100716927678753,0.974938112214481,3,43,histone-lysine N-methyltransferase activity,MF,hypergeometric,exon
GO:0031060,0.10077788562397,0.968171165637593,4,68,regulation of histone methylation,BP,hypergeometric,exon
GO:0006413,0.101741400239057,0.96252800877815,5,95,translational initiation,BP,hypergeometric,exon
GO:0034451,0.101741400239057,0.96252800877815,5,95,centriolar satellite,CC,hypergeometric,exon
GO:0016458,0.102137837488831,0.954732090961865,7,152,gene silencing,BP,hypergeometric,exon
GO:0000413,0.102538178122375,0.98358878625687,2,21,protein peptidyl-prolyl isomerization,BP,hypergeometric,exon
GO:0004114,0.102538178122375,0.98358878625687,2,21,"3',5'-cyclic-nucleotide phosphodiesterase activity",MF,hypergeometric,exon
GO:0005697,0.102538178122375,0.98358878625687,2,21,telomerase holoenzyme complex,CC,hypergeometric,exon
GO:0010829,0.102538178122375,0.98358878625687,2,21,negative regulation of glucose transmembrane transport,BP,hypergeometric,exon
GO:0030859,0.102538178122375,0.98358878625687,2,21,polarized epithelial cell differentiation,BP,hypergeometric,exon
GO:0032196,0.102538178122375,0.98358878625687,2,21,transposition,BP,hypergeometric,exon
GO:0032806,0.102538178122375,0.98358878625687,2,21,carboxy-terminal domain protein kinase complex,CC,hypergeometric,exon
GO:0043984,0.102538178122375,0.98358878625687,2,21,histone H4-K16 acetylation,BP,hypergeometric,exon
GO:0046337,0.102538178122375,0.98358878625687,2,21,phosphatidylethanolamine metabolic process,BP,hypergeometric,exon
GO:0046931,0.102538178122375,0.98358878625687,2,21,pore complex assembly,BP,hypergeometric,exon
GO:2000737,0.102538178122375,0.98358878625687,2,21,negative regulation of stem cell differentiation,BP,hypergeometric,exon
GO:0005261,0.103231559992099,0.946603387441297,10,243,cation channel activity,MF,hypergeometric,exon
GO:0036477,0.103275644335866,0.928328824702088,30,906,somatodendritic compartment,CC,hypergeometric,exon
GO:0031644,0.104794128109305,0.953264795452494,7,153,regulation of nervous system process,BP,hypergeometric,exon
GO:0036064,0.104794128109305,0.953264795452494,7,153,ciliary basal body,CC,hypergeometric,exon
GO:1903322,0.104804666244244,0.956767196918242,6,124,positive regulation of protein modification by small protein conjugation or removal,BP,hypergeometric,exon
GO:0001510,0.104911178742489,0.966388127551966,4,69,RNA methylation,BP,hypergeometric,exon
GO:0098781,0.106109367794776,0.972979753906904,3,44,ncRNA transcription,BP,hypergeometric,exon
GO:0042176,0.107808613882825,0.938519741766427,13,340,regulation of protein catabolic process,BP,hypergeometric,exon
GO:2000112,0.10805537252504,0.914206985080166,80,2700,regulation of cellular macromolecule biosynthetic process,BP,hypergeometric,exon
GO:0002027,0.10912059442236,0.964544179975385,4,70,regulation of heart rate,BP,hypergeometric,exon
GO:0051881,0.10912059442236,0.964544179975385,4,70,regulation of mitochondrial membrane potential,BP,hypergeometric,exon
GO:0005732,0.110927668496693,0.981356725620799,2,22,sno(s)RNA-containing ribonucleoprotein complex,CC,hypergeometric,exon
GO:0005868,0.110927668496693,0.981356725620799,2,22,cytoplasmic dynein complex,CC,hypergeometric,exon
GO:0014808,0.110927668496693,0.981356725620799,2,22,release of sequestered calcium ion into cytosol by sarcoplasmic reticulum,BP,hypergeometric,exon
GO:0044331,0.110927668496693,0.981356725620799,2,22,cell-cell adhesion mediated by cadherin,BP,hypergeometric,exon
GO:0061484,0.110927668496693,0.981356725620799,2,22,hematopoietic stem cell homeostasis,BP,hypergeometric,exon
GO:1903514,0.110927668496693,0.981356725620799,2,22,release of sequestered calcium ion into cytosol by endoplasmic reticulum,BP,hypergeometric,exon
GO:2001169,0.110927668496693,0.981356725620799,2,22,regulation of ATP biosynthetic process,BP,hypergeometric,exon
GO:0002011,0.111612348175911,0.970932357541112,3,45,morphogenesis of an epithelial sheet,BP,hypergeometric,exon
GO:0032623,0.111612348175911,0.970932357541112,3,45,interleukin-2 production,BP,hypergeometric,exon
GO:0097110,0.113404744582423,0.962638920758685,4,71,scaffold protein binding,MF,hypergeometric,exon
GO:0007626,0.113977776965749,0.942238861712062,9,217,locomotory behavior,BP,hypergeometric,exon
GO:0070588,0.113977776965749,0.942238861712062,9,217,calcium ion transmembrane transport,BP,hypergeometric,exon
GO:0008237,0.114011192544943,0.951886034845298,6,127,metallopeptidase activity,MF,hypergeometric,exon
GO:0030425,0.115730745691402,0.923525529812425,22,643,dendrite,CC,hypergeometric,exon
GO:0000904,0.115807441377634,0.922739641556596,23,677,cell morphogenesis involved in differentiation,BP,hypergeometric,exon
GO:0030018,0.115839755426939,0.95560775528373,5,99,Z disc,CC,hypergeometric,exon
GO:0060997,0.11776219979153,0.960671993972393,4,72,dendritic spine morphogenesis,BP,hypergeometric,exon
GO:0030054,0.118181980667416,0.910210429652941,50,1626,cell junction,CC,hypergeometric,exon
GO:0048589,0.118267103378685,0.922429041314641,21,611,developmental growth,BP,hypergeometric,exon
GO:1903320,0.11872132505121,0.939317051014673,9,219,regulation of protein modification by small protein conjugation or removal,BP,hypergeometric,exon
GO:0004112,0.11948886736533,0.978964919624003,2,23,cyclic-nucleotide phosphodiesterase activity,MF,hypergeometric,exon
GO:0015605,0.11948886736533,0.978964919624003,2,23,organophosphate ester transmembrane transporter activity,MF,hypergeometric,exon
GO:0034405,0.11948886736533,0.978964919624003,2,23,response to fluid shear stress,BP,hypergeometric,exon
GO:0035020,0.11948886736533,0.978964919624003,2,23,regulation of Rac protein signal transduction,BP,hypergeometric,exon
GO:0044030,0.11948886736533,0.978964919624003,2,23,regulation of DNA methylation,BP,hypergeometric,exon
GO:0045070,0.11948886736533,0.978964919624003,2,23,positive regulation of viral genome replication,BP,hypergeometric,exon
GO:0051457,0.11948886736533,0.978964919624003,2,23,maintenance of protein location in nucleus,BP,hypergeometric,exon
GO:0060306,0.11948886736533,0.978964919624003,2,23,regulation of membrane repolarization,BP,hypergeometric,exon
GO:0072337,0.11948886736533,0.978964919624003,2,23,modified amino acid transport,BP,hypergeometric,exon
GO:0095500,0.11948886736533,0.978964919624003,2,23,acetylcholine receptor signaling pathway,BP,hypergeometric,exon
GO:1904037,0.11948886736533,0.978964919624003,2,23,positive regulation of epithelial cell apoptotic process,BP,hypergeometric,exon
GO:0097447,0.119818728460237,0.920480471366912,22,646,dendritic tree,CC,hypergeometric,exon
GO:0031396,0.120693339750195,0.940938285955158,8,189,regulation of protein ubiquitination,BP,hypergeometric,exon
GO:0044304,0.122191491941411,0.958643089793935,4,73,main axon,CC,hypergeometric,exon
GO:0051304,0.122191491941411,0.958643089793935,4,73,chromosome separation,BP,hypergeometric,exon
GO:0044091,0.122935174510209,0.966568283209398,3,47,membrane biogenesis,BP,hypergeometric,exon
GO:0044784,0.122935174510209,0.966568283209398,3,47,metaphase/anaphase transition of cell cycle,BP,hypergeometric,exon
GO:0018107,0.123220165246345,0.951867394819673,5,101,peptidyl-threonine phosphorylation,BP,hypergeometric,exon
GO:0030863,0.123220165246345,0.951867394819673,5,101,cortical cytoskeleton,CC,hypergeometric,exon
GO:0000120,0.123516225893971,0.993590787757156,1,5,RNA polymerase I transcription regulator complex,CC,hypergeometric,exon
GO:0001651,0.123516225893971,0.993590787757156,1,5,dense fibrillar component,CC,hypergeometric,exon
GO:0001674,0.123516225893971,0.993590787757156,1,5,female germ cell nucleus,CC,hypergeometric,exon
GO:0003344,0.123516225893971,0.993590787757156,1,5,pericardium morphogenesis,BP,hypergeometric,exon
GO:0003383,0.123516225893971,0.993590787757156,1,5,apical constriction,BP,hypergeometric,exon
GO:0005221,0.123516225893971,0.993590787757156,1,5,intracellular cyclic nucleotide activated cation channel activity,MF,hypergeometric,exon
GO:0005964,0.123516225893971,0.993590787757156,1,5,phosphorylase kinase complex,CC,hypergeometric,exon
GO:0006041,0.123516225893971,0.993590787757156,1,5,glucosamine metabolic process,BP,hypergeometric,exon
GO:0007023,0.123516225893971,0.993590787757156,1,5,post-chaperonin tubulin folding pathway,BP,hypergeometric,exon
GO:0007198,0.123516225893971,0.993590787757156,1,5,adenylate cyclase-inhibiting serotonin receptor signaling pathway,BP,hypergeometric,exon
GO:0008273,0.123516225893971,0.993590787757156,1,5,"calcium, potassium:sodium antiporter activity",MF,hypergeometric,exon
GO:0009438,0.123516225893971,0.993590787757156,1,5,methylglyoxal metabolic process,BP,hypergeometric,exon
GO:0010519,0.123516225893971,0.993590787757156,1,5,negative regulation of phospholipase activity,BP,hypergeometric,exon
GO:0014043,0.123516225893971,0.993590787757156,1,5,negative regulation of neuron maturation,BP,hypergeometric,exon
GO:0015186,0.123516225893971,0.993590787757156,1,5,L-glutamine transmembrane transporter activity,MF,hypergeometric,exon
GO:0015190,0.123516225893971,0.993590787757156,1,5,L-leucine transmembrane transporter activity,MF,hypergeometric,exon
GO:0015884,0.123516225893971,0.993590787757156,1,5,folic acid transport,BP,hypergeometric,exon
GO:0016012,0.123516225893971,0.993590787757156,1,5,sarcoglycan complex,CC,hypergeometric,exon
GO:0016191,0.123516225893971,0.993590787757156,1,5,synaptic vesicle uncoating,BP,hypergeometric,exon
GO:0016199,0.123516225893971,0.993590787757156,1,5,axon midline choice point recognition,BP,hypergeometric,exon
GO:0030397,0.123516225893971,0.993590787757156,1,5,membrane disassembly,BP,hypergeometric,exon
GO:0030620,0.123516225893971,0.993590787757156,1,5,U2 snRNA binding,MF,hypergeometric,exon
GO:0030809,0.123516225893971,0.993590787757156,1,5,negative regulation of nucleotide biosynthetic process,BP,hypergeometric,exon
GO:0031697,0.123516225893971,0.993590787757156,1,5,beta-1 adrenergic receptor binding,MF,hypergeometric,exon
GO:0032847,0.123516225893971,0.993590787757156,1,5,regulation of cellular pH reduction,BP,hypergeometric,exon
GO:0032978,0.123516225893971,0.993590787757156,1,5,protein insertion into membrane from inner side,BP,hypergeometric,exon
GO:0033313,0.123516225893971,0.993590787757156,1,5,meiotic cell cycle checkpoint signaling,BP,hypergeometric,exon
GO:0034635,0.123516225893971,0.993590787757156,1,5,glutathione transport,BP,hypergeometric,exon
GO:0035061,0.123516225893971,0.993590787757156,1,5,interchromatin granule,CC,hypergeometric,exon
GO:0035356,0.123516225893971,0.993590787757156,1,5,cellular triglyceride homeostasis,BP,hypergeometric,exon
GO:0035509,0.123516225893971,0.993590787757156,1,5,negative regulation of myosin-light-chain-phosphatase activity,BP,hypergeometric,exon
GO:0035513,0.123516225893971,0.993590787757156,1,5,oxidative RNA demethylation,BP,hypergeometric,exon
GO:0035514,0.123516225893971,0.993590787757156,1,5,DNA demethylase activity,MF,hypergeometric,exon
GO:0035515,0.123516225893971,0.993590787757156,1,5,oxidative RNA demethylase activity,MF,hypergeometric,exon
GO:0035965,0.123516225893971,0.993590787757156,1,5,cardiolipin acyl-chain remodeling,BP,hypergeometric,exon
GO:0036091,0.123516225893971,0.993590787757156,1,5,positive regulation of transcription from RNA polymerase II promoter in response to oxidative stress,BP,hypergeometric,exon
GO:0036493,0.123516225893971,0.993590787757156,1,5,positive regulation of translation in response to endoplasmic reticulum stress,BP,hypergeometric,exon
GO:0042939,0.123516225893971,0.993590787757156,1,5,tripeptide transport,BP,hypergeometric,exon
GO:0043855,0.123516225893971,0.993590787757156,1,5,cyclic nucleotide-gated ion channel activity,MF,hypergeometric,exon
GO:0045053,0.123516225893971,0.993590787757156,1,5,protein retention in Golgi apparatus,BP,hypergeometric,exon
GO:0045900,0.123516225893971,0.993590787757156,1,5,negative regulation of translational elongation,BP,hypergeometric,exon
GO:0048022,0.123516225893971,0.993590787757156,1,5,negative regulation of melanin biosynthetic process,BP,hypergeometric,exon
GO:0048254,0.123516225893971,0.993590787757156,1,5,snoRNA localization,BP,hypergeometric,exon
GO:0051459,0.123516225893971,0.993590787757156,1,5,regulation of corticotropin secretion,BP,hypergeometric,exon
GO:0051562,0.123516225893971,0.993590787757156,1,5,negative regulation of mitochondrial calcium ion concentration,BP,hypergeometric,exon
GO:0061459,0.123516225893971,0.993590787757156,1,5,L-arginine transmembrane transporter activity,MF,hypergeometric,exon
GO:0062176,0.123516225893971,0.993590787757156,1,5,R-loop disassembly,BP,hypergeometric,exon
GO:0072385,0.123516225893971,0.993590787757156,1,5,minus-end-directed organelle transport along microtubule,BP,hypergeometric,exon
GO:0086007,0.123516225893971,0.993590787757156,1,5,voltage-gated calcium channel activity involved in cardiac muscle cell action potential,MF,hypergeometric,exon
GO:0086064,0.123516225893971,0.993590787757156,1,5,cell communication by electrical coupling involved in cardiac conduction,BP,hypergeometric,exon
GO:0090315,0.123516225893971,0.993590787757156,1,5,negative regulation of protein targeting to membrane,BP,hypergeometric,exon
GO:0097224,0.123516225893971,0.993590787757156,1,5,sperm connecting piece,CC,hypergeometric,exon
GO:0097240,0.123516225893971,0.993590787757156,1,5,chromosome attachment to the nuclear envelope,BP,hypergeometric,exon
GO:0097749,0.123516225893971,0.993590787757156,1,5,membrane tubulation,BP,hypergeometric,exon
GO:0098826,0.123516225893971,0.993590787757156,1,5,endoplasmic reticulum tubular network membrane,CC,hypergeometric,exon
GO:0098838,0.123516225893971,0.993590787757156,1,5,folate transmembrane transport,BP,hypergeometric,exon
GO:0098871,0.123516225893971,0.993590787757156,1,5,postsynaptic actin cytoskeleton,CC,hypergeometric,exon
GO:0099624,0.123516225893971,0.993590787757156,1,5,atrial cardiac muscle cell membrane repolarization,BP,hypergeometric,exon
GO:0140444,0.123516225893971,0.993590787757156,1,5,cytoskeleton-nuclear membrane anchor activity,MF,hypergeometric,exon
GO:1900372,0.123516225893971,0.993590787757156,1,5,negative regulation of purine nucleotide biosynthetic process,BP,hypergeometric,exon
GO:1900377,0.123516225893971,0.993590787757156,1,5,negative regulation of secondary metabolite biosynthetic process,BP,hypergeometric,exon
GO:1900736,0.123516225893971,0.993590787757156,1,5,regulation of phospholipase C-activating G protein-coupled receptor signaling pathway,BP,hypergeometric,exon
GO:1901537,0.123516225893971,0.993590787757156,1,5,positive regulation of DNA demethylation,BP,hypergeometric,exon
GO:1902527,0.123516225893971,0.993590787757156,1,5,positive regulation of protein monoubiquitination,BP,hypergeometric,exon
GO:1903251,0.123516225893971,0.993590787757156,1,5,multi-ciliated epithelial cell differentiation,BP,hypergeometric,exon
GO:1990416,0.123516225893971,0.993590787757156,1,5,cellular response to brain-derived neurotrophic factor stimulus,BP,hypergeometric,exon
GO:1990708,0.123516225893971,0.993590787757156,1,5,conditioned place preference,BP,hypergeometric,exon
GO:1990715,0.123516225893971,0.993590787757156,1,5,mRNA CDS binding,MF,hypergeometric,exon
GO:2000726,0.123516225893971,0.993590787757156,1,5,negative regulation of cardiac muscle cell differentiation,BP,hypergeometric,exon
GO:2000819,0.123516225893971,0.993590787757156,1,5,regulation of nucleotide-excision repair,BP,hypergeometric,exon
GO:0050839,0.123571299179408,0.936300723470209,9,221,cell adhesion molecule binding,MF,hypergeometric,exon
GO:0019827,0.123612651475018,0.946667110139465,6,130,stem cell population maintenance,BP,hypergeometric,exon
GO:0016887,0.12600198713702,0.937731200375535,8,191,ATP hydrolysis activity,MF,hypergeometric,exon
GO:0070603,0.126691116871125,0.956551944328575,4,74,SWI/SNF superfamily-type complex,CC,hypergeometric,exon
GO:0048731,0.127291260086505,0.895988859578582,101,3504,system development,BP,hypergeometric,exon
GO:0007018,0.127358443451731,0.927090328919775,12,318,microtubule-based movement,BP,hypergeometric,exon
GO:0003009,0.12820722217116,0.9764130354988,2,24,skeletal muscle contraction,BP,hypergeometric,exon
GO:0008143,0.12820722217116,0.9764130354988,2,24,poly(A) binding,MF,hypergeometric,exon
GO:0016339,0.12820722217116,0.9764130354988,2,24,calcium-dependent cell-cell adhesion via plasma membrane cell adhesion molecules,BP,hypergeometric,exon
GO:0031690,0.12820722217116,0.9764130354988,2,24,adrenergic receptor binding,MF,hypergeometric,exon
GO:0070296,0.12820722217116,0.9764130354988,2,24,sarcoplasmic reticulum calcium ion transport,BP,hypergeometric,exon
GO:0070741,0.12820722217116,0.9764130354988,2,24,response to interleukin-6,BP,hypergeometric,exon
GO:0071354,0.12820722217116,0.9764130354988,2,24,cellular response to interleukin-6,BP,hypergeometric,exon
GO:1900242,0.12820722217116,0.9764130354988,2,24,regulation of synaptic vesicle endocytosis,BP,hypergeometric,exon
GO:1903579,0.12820722217116,0.9764130354988,2,24,negative regulation of ATP metabolic process,BP,hypergeometric,exon
GO:0010556,0.128404668917798,0.896880875940757,80,2729,regulation of macromolecule biosynthetic process,BP,hypergeometric,exon
GO:0006493,0.128747572433158,0.964250794334029,3,48,protein O-linked glycosylation,BP,hypergeometric,exon
GO:0032784,0.128747572433158,0.964250794334029,3,48,"regulation of DNA-templated transcription, elongation",BP,hypergeometric,exon
GO:0061337,0.128747572433158,0.964250794334029,3,48,cardiac conduction,BP,hypergeometric,exon
GO:0070265,0.128747572433158,0.964250794334029,3,48,necrotic cell death,BP,hypergeometric,exon
GO:0050794,0.129007707576654,0.892033590586926,206,7488,regulation of cellular process,BP,hypergeometric,exon
GO:0031674,0.130813493388855,0.947937971692498,5,103,I band,CC,hypergeometric,exon
GO:0001738,0.13125953694088,0.954398339367026,4,75,morphogenesis of a polarized epithelium,BP,hypergeometric,exon
GO:1902554,0.13125953694088,0.954398339367026,4,75,serine/threonine protein kinase complex,CC,hypergeometric,exon
GO:1904949,0.13125953694088,0.954398339367026,4,75,ATPase complex,CC,hypergeometric,exon
GO:0009451,0.133597459493336,0.941106252998927,6,133,RNA modification,BP,hypergeometric,exon
GO:0015267,0.133635099345963,0.92283212487283,12,321,channel activity,MF,hypergeometric,exon
GO:0022803,0.133635099345963,0.92283212487283,12,321,passive transmembrane transporter activity,MF,hypergeometric,exon
GO:0050804,0.134024593212283,0.916118890016643,16,453,modulation of chemical synaptic transmission,BP,hypergeometric,exon
GO:0031323,0.134565496628651,0.888472446602042,121,4262,regulation of cellular metabolic process,BP,hypergeometric,exon
GO:0004713,0.134688011977504,0.945901974666398,5,104,protein tyrosine kinase activity,MF,hypergeometric,exon
GO:0031398,0.134688011977504,0.945901974666398,5,104,positive regulation of protein ubiquitination,BP,hypergeometric,exon
GO:0099177,0.135809224016682,0.91482967505815,16,454,regulation of trans-synaptic signaling,BP,hypergeometric,exon
GO:0044238,0.135950477234528,0.885837406798562,199,7230,primary metabolic process,BP,hypergeometric,exon
GO:0043488,0.137008720287465,0.939176104114751,6,134,regulation of mRNA stability,BP,hypergeometric,exon
GO:0098727,0.137008720287465,0.939176104114751,6,134,maintenance of cell number,BP,hypergeometric,exon
GO:0010586,0.137068817686555,0.973701126255881,2,25,miRNA metabolic process,BP,hypergeometric,exon
GO:0034063,0.137068817686555,0.973701126255881,2,25,stress granule assembly,BP,hypergeometric,exon
GO:0090151,0.137068817686555,0.973701126255881,2,25,establishment of protein localization to mitochondrial membrane,BP,hypergeometric,exon
GO:1905144,0.137068817686555,0.973701126255881,2,25,response to acetylcholine,BP,hypergeometric,exon
GO:1905145,0.137068817686555,0.973701126255881,2,25,cellular response to acetylcholine,BP,hypergeometric,exon
GO:0008277,0.138613327411531,0.943818296703032,5,105,regulation of G protein-coupled receptor signaling pathway,BP,hypergeometric,exon
GO:0071356,0.138613327411531,0.943818296703032,5,105,cellular response to tumor necrosis factor,BP,hypergeometric,exon
GO:0051146,0.138748733846381,0.926678872443201,9,227,striated muscle cell differentiation,BP,hypergeometric,exon
GO:0031326,0.139361037797335,0.887118843246318,83,2854,regulation of cellular biosynthetic process,BP,hypergeometric,exon
GO:0000123,0.140596459620392,0.949903104671158,4,77,histone acetyltransferase complex,CC,hypergeometric,exon
GO:0008023,0.140655585947514,0.959343682204268,3,50,transcription elongation factor complex,CC,hypergeometric,exon
GO:0043297,0.140655585947514,0.959343682204268,3,50,apical junction assembly,BP,hypergeometric,exon
GO:0045069,0.140655585947514,0.959343682204268,3,50,regulation of viral genome replication,BP,hypergeometric,exon
GO:0045143,0.140655585947514,0.959343682204268,3,50,homologous chromosome segregation,BP,hypergeometric,exon
GO:0065002,0.140655585947514,0.959343682204268,3,50,intracellular protein transmembrane transport,BP,hypergeometric,exon
GO:0071704,0.140946655609482,0.881545600904495,211,7701,organic substance metabolic process,BP,hypergeometric,exon
GO:0043235,0.141199861369382,0.919823063205473,11,292,receptor complex,CC,hypergeometric,exon
GO:0044089,0.14124410576021,0.910884956462341,16,457,positive regulation of cellular component biogenesis,BP,hypergeometric,exon
GO:0021543,0.143952692993322,0.935200515841739,6,136,pallium development,BP,hypergeometric,exon
GO:0030424,0.145188230687087,0.902184850919697,21,629,axon,CC,hypergeometric,exon
GO:0061157,0.145361741974772,0.947561263935641,4,78,mRNA destabilization,BP,hypergeometric,exon
GO:1903312,0.145361741974772,0.947561263935641,4,78,negative regulation of mRNA metabolic process,BP,hypergeometric,exon
GO:1903578,0.145361741974772,0.947561263935641,4,78,regulation of ATP metabolic process,BP,hypergeometric,exon
GO:0016082,0.146060352849733,0.970829604271578,2,26,synaptic vesicle priming,BP,hypergeometric,exon
GO:0016342,0.146060352849733,0.970829604271578,2,26,catenin complex,CC,hypergeometric,exon
GO:0070266,0.146060352849733,0.970829604271578,2,26,necroptotic process,BP,hypergeometric,exon
GO:0071425,0.146060352849733,0.970829604271578,2,26,hematopoietic stem cell proliferation,BP,hypergeometric,exon
GO:1905476,0.146060352849733,0.970829604271578,2,26,negative regulation of protein localization to membrane,BP,hypergeometric,exon
GO:0000268,0.146329668808645,0.990550988679403,1,6,peroxisome targeting sequence binding,MF,hypergeometric,exon
GO:0000395,0.146329668808645,0.990550988679403,1,6,mRNA 5'-splice site recognition,BP,hypergeometric,exon
GO:0000796,0.146329668808645,0.990550988679403,1,6,condensin complex,CC,hypergeometric,exon
GO:0000801,0.146329668808645,0.990550988679403,1,6,central element,CC,hypergeometric,exon
GO:0001652,0.146329668808645,0.990550988679403,1,6,granular component,CC,hypergeometric,exon
GO:0001739,0.146329668808645,0.990550988679403,1,6,sex chromatin,CC,hypergeometric,exon
GO:0002154,0.146329668808645,0.990550988679403,1,6,thyroid hormone mediated signaling pathway,BP,hypergeometric,exon
GO:0002755,0.146329668808645,0.990550988679403,1,6,MyD88-dependent toll-like receptor signaling pathway,BP,hypergeometric,exon
GO:0003025,0.146329668808645,0.990550988679403,1,6,regulation of systemic arterial blood pressure by baroreceptor feedback,BP,hypergeometric,exon
GO:0003993,0.146329668808645,0.990550988679403,1,6,acid phosphatase activity,MF,hypergeometric,exon
GO:0004690,0.146329668808645,0.990550988679403,1,6,cyclic nucleotide-dependent protein kinase activity,MF,hypergeometric,exon
GO:0004711,0.146329668808645,0.990550988679403,1,6,ribosomal protein S6 kinase activity,MF,hypergeometric,exon
GO:0005004,0.146329668808645,0.990550988679403,1,6,GPI-linked ephrin receptor activity,MF,hypergeometric,exon
GO:0005041,0.146329668808645,0.990550988679403,1,6,low-density lipoprotein particle receptor activity,MF,hypergeometric,exon
GO:0005587,0.146329668808645,0.990550988679403,1,6,collagen type IV trimer,CC,hypergeometric,exon
GO:0008385,0.146329668808645,0.990550988679403,1,6,IkappaB kinase complex,CC,hypergeometric,exon
GO:0008553,0.146329668808645,0.990550988679403,1,6,P-type proton-exporting transporter activity,MF,hypergeometric,exon
GO:0010032,0.146329668808645,0.990550988679403,1,6,meiotic chromosome condensation,BP,hypergeometric,exon
GO:0015658,0.146329668808645,0.990550988679403,1,6,branched-chain amino acid transmembrane transporter activity,MF,hypergeometric,exon
GO:0016011,0.146329668808645,0.990550988679403,1,6,dystroglycan complex,CC,hypergeometric,exon
GO:0016281,0.146329668808645,0.990550988679403,1,6,eukaryotic translation initiation factor 4F complex,CC,hypergeometric,exon
GO:0016615,0.146329668808645,0.990550988679403,1,6,malate dehydrogenase activity,MF,hypergeometric,exon
GO:0019695,0.146329668808645,0.990550988679403,1,6,choline metabolic process,BP,hypergeometric,exon
GO:0021785,0.146329668808645,0.990550988679403,1,6,branchiomotor neuron axon guidance,BP,hypergeometric,exon
GO:0022889,0.146329668808645,0.990550988679403,1,6,serine transmembrane transporter activity,MF,hypergeometric,exon
GO:0030382,0.146329668808645,0.990550988679403,1,6,sperm mitochondrion organization,BP,hypergeometric,exon
GO:0030619,0.146329668808645,0.990550988679403,1,6,U1 snRNA binding,MF,hypergeometric,exon
GO:0032329,0.146329668808645,0.990550988679403,1,6,serine transport,BP,hypergeometric,exon
GO:0032908,0.146329668808645,0.990550988679403,1,6,regulation of transforming growth factor beta1 production,BP,hypergeometric,exon
GO:0033265,0.146329668808645,0.990550988679403,1,6,choline binding,MF,hypergeometric,exon
GO:0035881,0.146329668808645,0.990550988679403,1,6,amacrine cell differentiation,BP,hypergeometric,exon
GO:0044026,0.146329668808645,0.990550988679403,1,6,DNA hypermethylation,BP,hypergeometric,exon
GO:0045028,0.146329668808645,0.990550988679403,1,6,G protein-coupled purinergic nucleotide receptor activity,MF,hypergeometric,exon
GO:0046826,0.146329668808645,0.990550988679403,1,6,negative regulation of protein export from nucleus,BP,hypergeometric,exon
GO:0047238,0.146329668808645,0.990550988679403,1,6,glucuronosyl-N-acetylgalactosaminyl-proteoglycan 4-beta-N-acetylgalactosaminyltransferase activity,MF,hypergeometric,exon
GO:0051045,0.146329668808645,0.990550988679403,1,6,negative regulation of membrane protein ectodomain proteolysis,BP,hypergeometric,exon
GO:0051458,0.146329668808645,0.990550988679403,1,6,corticotropin secretion,BP,hypergeometric,exon
GO:0060029,0.146329668808645,0.990550988679403,1,6,convergent extension involved in organogenesis,BP,hypergeometric,exon
GO:0060297,0.146329668808645,0.990550988679403,1,6,regulation of sarcomere organization,BP,hypergeometric,exon
GO:0060745,0.146329668808645,0.990550988679403,1,6,mammary gland branching involved in pregnancy,BP,hypergeometric,exon
GO:0061643,0.146329668808645,0.990550988679403,1,6,chemorepulsion of axon,BP,hypergeometric,exon
GO:0061668,0.146329668808645,0.990550988679403,1,6,mitochondrial ribosome assembly,BP,hypergeometric,exon
GO:0070569,0.146329668808645,0.990550988679403,1,6,uridylyltransferase activity,MF,hypergeometric,exon
GO:0071986,0.146329668808645,0.990550988679403,1,6,Ragulator complex,CC,hypergeometric,exon
GO:0090240,0.146329668808645,0.990550988679403,1,6,positive regulation of histone H4 acetylation,BP,hypergeometric,exon
GO:0090521,0.146329668808645,0.990550988679403,1,6,glomerular visceral epithelial cell migration,BP,hypergeometric,exon
GO:0097165,0.146329668808645,0.990550988679403,1,6,nuclear stress granule,CC,hypergeometric,exon
GO:0098642,0.146329668808645,0.990550988679403,1,6,network-forming collagen trimer,CC,hypergeometric,exon
GO:0098645,0.146329668808645,0.990550988679403,1,6,collagen network,CC,hypergeometric,exon
GO:0098651,0.146329668808645,0.990550988679403,1,6,basement membrane collagen trimer,CC,hypergeometric,exon
GO:0098961,0.146329668808645,0.990550988679403,1,6,dendritic transport of ribonucleoprotein complex,BP,hypergeometric,exon
GO:0098963,0.146329668808645,0.990550988679403,1,6,dendritic transport of messenger ribonucleoprotein complex,BP,hypergeometric,exon
GO:0098993,0.146329668808645,0.990550988679403,1,6,anchored component of synaptic vesicle membrane,CC,hypergeometric,exon
GO:0140078,0.146329668808645,0.990550988679403,1,6,class I DNA-(apurinic or apyrimidinic site) endonuclease activity,MF,hypergeometric,exon
GO:0140507,0.146329668808645,0.990550988679403,1,6,granzyme-mediated programmed cell death signaling pathway,BP,hypergeometric,exon
GO:0150012,0.146329668808645,0.990550988679403,1,6,positive regulation of neuron projection arborization,BP,hypergeometric,exon
GO:1900147,0.146329668808645,0.990550988679403,1,6,regulation of Schwann cell migration,BP,hypergeometric,exon
GO:1900223,0.146329668808645,0.990550988679403,1,6,positive regulation of amyloid-beta clearance,BP,hypergeometric,exon
GO:1901535,0.146329668808645,0.990550988679403,1,6,regulation of DNA demethylation,BP,hypergeometric,exon
GO:1902035,0.146329668808645,0.990550988679403,1,6,positive regulation of hematopoietic stem cell proliferation,BP,hypergeometric,exon
GO:1902083,0.146329668808645,0.990550988679403,1,6,negative regulation of peptidyl-cysteine S-nitrosylation,BP,hypergeometric,exon
GO:1902525,0.146329668808645,0.990550988679403,1,6,regulation of protein monoubiquitination,BP,hypergeometric,exon
GO:1903371,0.146329668808645,0.990550988679403,1,6,regulation of endoplasmic reticulum tubular network organization,BP,hypergeometric,exon
GO:1904781,0.146329668808645,0.990550988679403,1,6,positive regulation of protein localization to centrosome,BP,hypergeometric,exon
GO:1905103,0.146329668808645,0.990550988679403,1,6,integral component of lysosomal membrane,CC,hypergeometric,exon
GO:1905203,0.146329668808645,0.990550988679403,1,6,regulation of connective tissue replacement,BP,hypergeometric,exon
GO:1905936,0.146329668808645,0.990550988679403,1,6,regulation of germ cell proliferation,BP,hypergeometric,exon
GO:1990116,0.146329668808645,0.990550988679403,1,6,ribosome-associated ubiquitin-dependent protein catabolic process,BP,hypergeometric,exon
GO:2000002,0.146329668808645,0.990550988679403,1,6,negative regulation of DNA damage checkpoint,BP,hypergeometric,exon
GO:2000254,0.146329668808645,0.990550988679403,1,6,regulation of male germ cell proliferation,BP,hypergeometric,exon
GO:0034968,0.146612905139898,0.939507572819187,5,107,histone lysine methylation,BP,hypergeometric,exon
GO:0006401,0.146682537366531,0.921543015992986,9,230,RNA catabolic process,BP,hypergeometric,exon
GO:0071005,0.146743677286299,0.956753875473052,3,51,U2-type precatalytic spliceosome,CC,hypergeometric,exon
GO:1905818,0.146743677286299,0.956753875473052,3,51,regulation of chromosome separation,BP,hypergeometric,exon
GO:0060047,0.148947354914088,0.92748575552105,7,168,heart contraction,BP,hypergeometric,exon
GO:0042177,0.150685396901724,0.937280425153721,5,108,negative regulation of protein catabolic process,BP,hypergeometric,exon
GO:0008757,0.151055032333076,0.931070858608622,6,138,S-adenosylmethionine-dependent methyltransferase activity,MF,hypergeometric,exon
GO:0034249,0.152164710608471,0.925511448298789,7,169,negative regulation of cellular amide metabolic process,BP,hypergeometric,exon
GO:0035264,0.152164710608471,0.925511448298789,7,169,multicellular organism growth,BP,hypergeometric,exon
GO:0001954,0.152916143969946,0.954073278546596,3,52,positive regulation of cell-matrix adhesion,BP,hypergeometric,exon
GO:0033045,0.152916143969946,0.954073278546596,3,52,regulation of sister chromatid segregation,BP,hypergeometric,exon
GO:0051568,0.152916143969946,0.954073278546596,3,52,histone H3-K4 methylation,BP,hypergeometric,exon
GO:0051781,0.152916143969946,0.954073278546596,3,52,positive regulation of cell division,BP,hypergeometric,exon
GO:2000379,0.152916143969946,0.954073278546596,3,52,positive regulation of reactive oxygen species metabolic process,BP,hypergeometric,exon
GO:0006402,0.154312796194366,0.920050029897013,8,201,mRNA catabolic process,BP,hypergeometric,exon
GO:0009889,0.154505625461967,0.873850477566283,84,2910,regulation of biosynthetic process,BP,hypergeometric,exon
GO:0070161,0.154655153966792,0.899610890817417,17,498,anchoring junction,CC,hypergeometric,exon
GO:0040029,0.154805146407545,0.935005392819359,5,109,"regulation of gene expression, epigenetic",BP,hypergeometric,exon
GO:0001221,0.155077716545719,0.942688939892314,4,80,transcription coregulator binding,MF,hypergeometric,exon
GO:0050779,0.155077716545719,0.942688939892314,4,80,RNA destabilization,BP,hypergeometric,exon
GO:0015175,0.155169118369794,0.967799216151024,2,27,neutral amino acid transmembrane transporter activity,MF,hypergeometric,exon
GO:0031045,0.155169118369794,0.967799216151024,2,27,dense core granule,CC,hypergeometric,exon
GO:0042462,0.155169118369794,0.967799216151024,2,27,eye photoreceptor cell development,BP,hypergeometric,exon
GO:0045071,0.155169118369794,0.967799216151024,2,27,negative regulation of viral genome replication,BP,hypergeometric,exon
GO:0046966,0.155169118369794,0.967799216151024,2,27,thyroid hormone receptor binding,MF,hypergeometric,exon
GO:0048027,0.155169118369794,0.967799216151024,2,27,mRNA 5'-UTR binding,MF,hypergeometric,exon
GO:0060077,0.155169118369794,0.967799216151024,2,27,inhibitory synapse,CC,hypergeometric,exon
GO:0071875,0.155169118369794,0.967799216151024,2,27,adrenergic receptor signaling pathway,BP,hypergeometric,exon
GO:0090313,0.155169118369794,0.967799216151024,2,27,regulation of protein targeting to membrane,BP,hypergeometric,exon
GO:0098698,0.155169118369794,0.967799216151024,2,27,postsynaptic specialization assembly,BP,hypergeometric,exon
GO:1903861,0.155169118369794,0.967799216151024,2,27,positive regulation of dendrite extension,BP,hypergeometric,exon
GO:0005515,0.155702055680091,0.868228965628034,189,6877,protein binding,MF,hypergeometric,exon
GO:0043226,0.156009047260457,0.870326886672474,265,9828,organelle,CC,hypergeometric,exon
GO:0042593,0.157300127524986,0.918129988573163,8,202,glucose homeostasis,BP,hypergeometric,exon
GO:0034250,0.158311265190712,0.926786926687495,6,140,positive regulation of cellular amide metabolic process,BP,hypergeometric,exon
GO:0061013,0.158311265190712,0.926786926687495,6,140,regulation of mRNA catabolic process,BP,hypergeometric,exon
GO:0090068,0.158695805639661,0.921466071361815,7,171,positive regulation of cell cycle process,BP,hypergeometric,exon
GO:0042826,0.1589712241026,0.932682485188597,5,110,histone deacetylase binding,MF,hypergeometric,exon
GO:0001736,0.159169235287795,0.951302044660876,3,53,establishment of planar polarity,BP,hypergeometric,exon
GO:0003407,0.159169235287795,0.951302044660876,3,53,neural retina development,BP,hypergeometric,exon
GO:0007164,0.159169235287795,0.951302044660876,3,53,establishment of tissue polarity,BP,hypergeometric,exon
GO:0016278,0.159169235287795,0.951302044660876,3,53,lysine N-methyltransferase activity,MF,hypergeometric,exon
GO:0016279,0.159169235287795,0.951302044660876,3,53,protein-lysine N-methyltransferase activity,MF,hypergeometric,exon
GO:0017053,0.159169235287795,0.951302044660876,3,53,transcription repressor complex,CC,hypergeometric,exon
GO:0071011,0.159169235287795,0.951302044660876,3,53,precatalytic spliceosome,CC,hypergeometric,exon
GO:0071806,0.159169235287795,0.951302044660876,3,53,protein transmembrane transport,BP,hypergeometric,exon
GO:0008276,0.16002505292651,0.940158508784506,4,81,protein methyltransferase activity,MF,hypergeometric,exon
GO:0061014,0.16002505292651,0.940158508784506,4,81,positive regulation of mRNA catabolic process,BP,hypergeometric,exon
GO:0033500,0.16031478916026,0.916182249834816,8,203,carbohydrate homeostasis,BP,hypergeometric,exon
GO:0050789,0.161462404701983,0.863311933726277,213,7810,regulation of biological process,BP,hypergeometric,exon
GO:0061564,0.16187279873424,0.897277610607081,15,434,axon development,BP,hypergeometric,exon
GO:0007059,0.162092721575627,0.90821158047287,10,268,chromosome segregation,BP,hypergeometric,exon
GO:0099080,0.163152306327761,0.881058086279344,30,955,supramolecular complex,CC,hypergeometric,exon
GO:0030261,0.164382975076297,0.964611018814748,2,28,chromosome condensation,BP,hypergeometric,exon
GO:0030332,0.164382975076297,0.964611018814748,2,28,cyclin binding,MF,hypergeometric,exon
GO:0030551,0.164382975076297,0.964611018814748,2,28,cyclic nucleotide binding,MF,hypergeometric,exon
GO:0042805,0.164382975076297,0.964611018814748,2,28,actinin binding,MF,hypergeometric,exon
GO:0042974,0.164382975076297,0.964611018814748,2,28,retinoic acid receptor binding,MF,hypergeometric,exon
GO:0061756,0.164382975076297,0.964611018814748,2,28,leukocyte adhesion to vascular endothelial cell,BP,hypergeometric,exon
GO:1904861,0.164382975076297,0.964611018814748,2,28,excitatory synapse assembly,BP,hypergeometric,exon
GO:0006928,0.164768727108098,0.87215717635272,47,1565,movement of cell or subcellular component,BP,hypergeometric,exon
GO:0003727,0.16502968833736,0.937565337585055,4,82,single-stranded RNA binding,MF,hypergeometric,exon
GO:0007029,0.16502968833736,0.937565337585055,4,82,endoplasmic reticulum organization,BP,hypergeometric,exon
GO:0001750,0.165499215026653,0.948440420272795,3,54,photoreceptor outer segment,CC,hypergeometric,exon
GO:0008643,0.167438566926003,0.927893200351094,5,112,carbohydrate transport,BP,hypergeometric,exon
GO:0060537,0.167483057223588,0.89917120811292,12,336,muscle tissue development,BP,hypergeometric,exon
GO:0000828,0.168550890990873,0.986997664284721,1,7,inositol hexakisphosphate kinase activity,MF,hypergeometric,exon
GO:0001520,0.168550890990873,0.986997664284721,1,7,outer dense fiber,CC,hypergeometric,exon
GO:0001839,0.168550890990873,0.986997664284721,1,7,neural plate morphogenesis,BP,hypergeometric,exon
GO:0002638,0.168550890990873,0.986997664284721,1,7,negative regulation of immunoglobulin production,BP,hypergeometric,exon
GO:0002692,0.168550890990873,0.986997664284721,1,7,negative regulation of cellular extravasation,BP,hypergeometric,exon
GO:0003953,0.168550890990873,0.986997664284721,1,7,NAD+ nucleosidase activity,MF,hypergeometric,exon
GO:0005452,0.168550890990873,0.986997664284721,1,7,inorganic anion exchanger activity,MF,hypergeometric,exon
GO:0007021,0.168550890990873,0.986997664284721,1,7,tubulin complex assembly,BP,hypergeometric,exon
GO:0008190,0.168550890990873,0.986997664284721,1,7,eukaryotic initiation factor 4E binding,MF,hypergeometric,exon
GO:0010649,0.168550890990873,0.986997664284721,1,7,regulation of cell communication by electrical coupling,BP,hypergeometric,exon
GO:0010793,0.168550890990873,0.986997664284721,1,7,regulation of mRNA export from nucleus,BP,hypergeometric,exon
GO:0015181,0.168550890990873,0.986997664284721,1,7,arginine transmembrane transporter activity,MF,hypergeometric,exon
GO:0015232,0.168550890990873,0.986997664284721,1,7,heme transmembrane transporter activity,MF,hypergeometric,exon
GO:0015886,0.168550890990873,0.986997664284721,1,7,heme transport,BP,hypergeometric,exon
GO:0016198,0.168550890990873,0.986997664284721,1,7,axon choice point recognition,BP,hypergeometric,exon
GO:0021814,0.168550890990873,0.986997664284721,1,7,cell motility involved in cerebral cortex radial glia guided migration,BP,hypergeometric,exon
GO:0030274,0.168550890990873,0.986997664284721,1,7,LIM domain binding,MF,hypergeometric,exon
GO:0031166,0.168550890990873,0.986997664284721,1,7,integral component of vacuolar membrane,CC,hypergeometric,exon
GO:0031310,0.168550890990873,0.986997664284721,1,7,intrinsic component of vacuolar membrane,CC,hypergeometric,exon
GO:0032905,0.168550890990873,0.986997664284721,1,7,transforming growth factor beta1 production,BP,hypergeometric,exon
GO:0034105,0.168550890990873,0.986997664284721,1,7,positive regulation of tissue remodeling,BP,hypergeometric,exon
GO:0034334,0.168550890990873,0.986997664284721,1,7,adherens junction maintenance,BP,hypergeometric,exon
GO:0035507,0.168550890990873,0.986997664284721,1,7,regulation of myosin-light-chain-phosphatase activity,BP,hypergeometric,exon
GO:0036135,0.168550890990873,0.986997664284721,1,7,Schwann cell migration,BP,hypergeometric,exon
GO:0042382,0.168550890990873,0.986997664284721,1,7,paraspeckles,CC,hypergeometric,exon
GO:0044545,0.168550890990873,0.986997664284721,1,7,NSL complex,CC,hypergeometric,exon
GO:0044648,0.168550890990873,0.986997664284721,1,7,histone H3-K4 dimethylation,BP,hypergeometric,exon
GO:0048290,0.168550890990873,0.986997664284721,1,7,isotype switching to IgA isotypes,BP,hypergeometric,exon
GO:0048296,0.168550890990873,0.986997664284721,1,7,regulation of isotype switching to IgA isotypes,BP,hypergeometric,exon
GO:0048537,0.168550890990873,0.986997664284721,1,7,mucosa-associated lymphoid tissue development,BP,hypergeometric,exon
GO:0048541,0.168550890990873,0.986997664284721,1,7,Peyer's patch development,BP,hypergeometric,exon
GO:0048934,0.168550890990873,0.986997664284721,1,7,peripheral nervous system neuron differentiation,BP,hypergeometric,exon
GO:0048935,0.168550890990873,0.986997664284721,1,7,peripheral nervous system neuron development,BP,hypergeometric,exon
GO:0050135,0.168550890990873,0.986997664284721,1,7,NAD(P)+ nucleosidase activity,MF,hypergeometric,exon
GO:0051286,0.168550890990873,0.986997664284721,1,7,cell tip,CC,hypergeometric,exon
GO:0060027,0.168550890990873,0.986997664284721,1,7,convergent extension involved in gastrulation,BP,hypergeometric,exon
GO:0060856,0.168550890990873,0.986997664284721,1,7,establishment of blood-brain barrier,BP,hypergeometric,exon
GO:0061087,0.168550890990873,0.986997664284721,1,7,positive regulation of histone H3-K27 methylation,BP,hypergeometric,exon
GO:0061809,0.168550890990873,0.986997664284721,1,7,"NAD+ nucleotidase, cyclic ADP-ribose generating",MF,hypergeometric,exon
GO:0070008,0.168550890990873,0.986997664284721,1,7,serine-type exopeptidase activity,MF,hypergeometric,exon
GO:0070314,0.168550890990873,0.986997664284721,1,7,G1 to G0 transition,BP,hypergeometric,exon
GO:0070761,0.168550890990873,0.986997664284721,1,7,pre-snoRNP complex,CC,hypergeometric,exon
GO:0071439,0.168550890990873,0.986997664284721,1,7,clathrin complex,CC,hypergeometric,exon
GO:0072318,0.168550890990873,0.986997664284721,1,7,clathrin coat disassembly,BP,hypergeometric,exon
GO:0072376,0.168550890990873,0.986997664284721,1,7,protein activation cascade,BP,hypergeometric,exon
GO:0072531,0.168550890990873,0.986997664284721,1,7,pyrimidine-containing compound transmembrane transport,BP,hypergeometric,exon
GO:0086015,0.168550890990873,0.986997664284721,1,7,SA node cell action potential,BP,hypergeometric,exon
GO:0086018,0.168550890990873,0.986997664284721,1,7,SA node cell to atrial cardiac muscle cell signaling,BP,hypergeometric,exon
GO:0086023,0.168550890990873,0.986997664284721,1,7,adenylate cyclase-activating adrenergic receptor signaling pathway involved in heart process,BP,hypergeometric,exon
GO:0086070,0.168550890990873,0.986997664284721,1,7,SA node cell to atrial cardiac muscle cell communication,BP,hypergeometric,exon
GO:0097011,0.168550890990873,0.986997664284721,1,7,cellular response to granulocyte macrophage colony-stimulating factor stimulus,BP,hypergeometric,exon
GO:0097177,0.168550890990873,0.986997664284721,1,7,mitochondrial ribosome binding,MF,hypergeometric,exon
GO:0097709,0.168550890990873,0.986997664284721,1,7,connective tissue replacement,BP,hypergeometric,exon
GO:0099026,0.168550890990873,0.986997664284721,1,7,anchored component of presynaptic membrane,CC,hypergeometric,exon
GO:0099635,0.168550890990873,0.986997664284721,1,7,voltage-gated calcium channel activity involved in positive regulation of presynaptic cytosolic calcium levels,MF,hypergeometric,exon
GO:1901897,0.168550890990873,0.986997664284721,1,7,regulation of relaxation of cardiac muscle,BP,hypergeometric,exon
GO:1902177,0.168550890990873,0.986997664284721,1,7,positive regulation of oxidative stress-induced intrinsic apoptotic signaling pathway,BP,hypergeometric,exon
GO:1903608,0.168550890990873,0.986997664284721,1,7,protein localization to cytoplasmic stress granule,BP,hypergeometric,exon
GO:1904393,0.168550890990873,0.986997664284721,1,7,regulation of skeletal muscle acetylcholine-gated channel clustering,BP,hypergeometric,exon
GO:1905616,0.168550890990873,0.986997664284721,1,7,regulation of miRNA mediated inhibition of translation,BP,hypergeometric,exon
GO:1905618,0.168550890990873,0.986997664284721,1,7,positive regulation of miRNA mediated inhibition of translation,BP,hypergeometric,exon
GO:1990446,0.168550890990873,0.986997664284721,1,7,U1 snRNP binding,MF,hypergeometric,exon
GO:1990709,0.168550890990873,0.986997664284721,1,7,presynaptic active zone organization,BP,hypergeometric,exon
GO:2000618,0.168550890990873,0.986997664284721,1,7,regulation of histone H4-K16 acetylation,BP,hypergeometric,exon
GO:2000630,0.168550890990873,0.986997664284721,1,7,positive regulation of miRNA metabolic process,BP,hypergeometric,exon
GO:0000819,0.169473879444956,0.920071907327442,6,143,sister chromatid segregation,BP,hypergeometric,exon
GO:0007156,0.170089903351573,0.934909558193353,4,83,homophilic cell adhesion via plasma membrane adhesion molecules,BP,hypergeometric,exon
GO:0045446,0.170089903351573,0.934909558193353,4,83,endothelial cell differentiation,BP,hypergeometric,exon
GO:0045666,0.170089903351573,0.934909558193353,4,83,positive regulation of neuron differentiation,BP,hypergeometric,exon
GO:0005216,0.170324460304539,0.899670375611353,11,304,ion channel activity,MF,hypergeometric,exon
GO:1990138,0.172132196941409,0.912988492718919,7,175,neuron projection extension,BP,hypergeometric,exon
GO:0031941,0.173690332989962,0.961266356758185,2,29,filamentous actin,CC,hypergeometric,exon
GO:0034661,0.173690332989962,0.961266356758185,2,29,ncRNA catabolic process,BP,hypergeometric,exon
GO:0098632,0.173690332989962,0.961266356758185,2,29,cell-cell adhesion mediator activity,MF,hypergeometric,exon
GO:0098918,0.173690332989962,0.961266356758185,2,29,structural constituent of synapse,MF,hypergeometric,exon
GO:1903859,0.173690332989962,0.961266356758185,2,29,regulation of dendrite extension,BP,hypergeometric,exon
GO:0007275,0.174616067364229,0.853627734915501,111,3942,multicellular organism development,BP,hypergeometric,exon
GO:0008645,0.175203965700889,0.932191343634744,4,84,hexose transmembrane transport,BP,hypergeometric,exon
GO:0097733,0.175203965700889,0.932191343634744,4,84,photoreceptor cell cilium,CC,hypergeometric,exon
GO:1904659,0.175203965700889,0.932191343634744,4,84,glucose transmembrane transport,BP,hypergeometric,exon
GO:0033135,0.176079686556304,0.922913118036679,5,114,regulation of peptidyl-serine phosphorylation,BP,hypergeometric,exon
GO:0043487,0.177093969366246,0.915402967856248,6,145,regulation of RNA stability,BP,hypergeometric,exon
GO:0140640,0.177826439063347,0.882058035720563,17,510,"catalytic activity, acting on a nucleic acid",MF,hypergeometric,exon
GO:0006305,0.178374996695076,0.942447435280601,3,56,DNA alkylation,BP,hypergeometric,exon
GO:0006306,0.178374996695076,0.942447435280601,3,56,DNA methylation,BP,hypergeometric,exon
GO:0032526,0.178374996695076,0.942447435280601,3,56,response to retinoic acid,BP,hypergeometric,exon
GO:0046530,0.178374996695076,0.942447435280601,3,56,photoreceptor cell differentiation,BP,hypergeometric,exon
GO:0060042,0.178374996695076,0.942447435280601,3,56,retina morphogenesis in camera-type eye,BP,hypergeometric,exon
GO:0098586,0.178374996695076,0.942447435280601,3,56,cellular response to virus,BP,hypergeometric,exon
GO:2001244,0.178374996695076,0.942447435280601,3,56,positive regulation of intrinsic apoptotic signaling pathway,BP,hypergeometric,exon
GO:0016810,0.180370132270808,0.929410907339984,4,85,"hydrolase activity, acting on carbon-nitrogen (but not peptide) bonds",MF,hypergeometric,exon
GO:0045727,0.180462935962733,0.920351800385142,5,115,positive regulation of translation,BP,hypergeometric,exon
GO:0030029,0.180668963925189,0.874594144153906,21,650,actin filament-based process,BP,hypergeometric,exon
GO:0004864,0.183080131091781,0.957766840435503,2,30,protein phosphatase inhibitor activity,MF,hypergeometric,exon
GO:0007520,0.183080131091781,0.957766840435503,2,30,myoblast fusion,BP,hypergeometric,exon
GO:0017004,0.183080131091781,0.957766840435503,2,30,cytochrome complex assembly,BP,hypergeometric,exon
GO:0030808,0.183080131091781,0.957766840435503,2,30,regulation of nucleotide biosynthetic process,BP,hypergeometric,exon
GO:0046189,0.183080131091781,0.957766840435503,2,30,phenol-containing compound biosynthetic process,BP,hypergeometric,exon
GO:0071007,0.183080131091781,0.957766840435503,2,30,U2-type catalytic step 2 spliceosome,CC,hypergeometric,exon
GO:0086065,0.183080131091781,0.957766840435503,2,30,cell communication involved in cardiac conduction,BP,hypergeometric,exon
GO:0097009,0.183080131091781,0.957766840435503,2,30,energy homeostasis,BP,hypergeometric,exon
GO:1900371,0.183080131091781,0.957766840435503,2,30,regulation of purine nucleotide biosynthetic process,BP,hypergeometric,exon
GO:1901385,0.183080131091781,0.957766840435503,2,30,regulation of voltage-gated calcium channel activity,BP,hypergeometric,exon
GO:1902494,0.183950111000093,0.859476438893007,38,1256,catalytic complex,CC,hypergeometric,exon
GO:0099536,0.184267697271558,0.871742209909614,21,652,synaptic signaling,BP,hypergeometric,exon
GO:0045216,0.184850783977986,0.910580920302392,6,147,cell-cell junction organization,BP,hypergeometric,exon
GO:0048469,0.184850783977986,0.910580920302392,6,147,cell maturation,BP,hypergeometric,exon
GO:0008033,0.184886633800149,0.917743156027891,5,116,tRNA processing,BP,hypergeometric,exon
GO:0050775,0.184913441430514,0.939317008542816,3,57,positive regulation of dendrite morphogenesis,BP,hypergeometric,exon
GO:0003013,0.185309023726746,0.883851484126436,13,377,circulatory system process,BP,hypergeometric,exon
GO:0042277,0.185379322368931,0.899605451801834,8,211,peptide binding,MF,hypergeometric,exon
GO:0008013,0.18558665103482,0.926568502391431,4,86,beta-catenin binding,MF,hypergeometric,exon
GO:0015749,0.18558665103482,0.926568502391431,4,86,monosaccharide transmembrane transport,BP,hypergeometric,exon
GO:0031248,0.18558665103482,0.926568502391431,4,86,protein acetyltransferase complex,CC,hypergeometric,exon
GO:1902493,0.18558665103482,0.926568502391431,4,86,acetyltransferase complex,CC,hypergeometric,exon
GO:0016740,0.188020688925899,0.85043072501779,53,1804,transferase activity,MF,hypergeometric,exon
GO:0050905,0.188778820249074,0.908112741104426,6,148,neuromuscular process,BP,hypergeometric,exon
GO:0061024,0.189344937744045,0.870229328831107,19,585,membrane organization,BP,hypergeometric,exon
GO:0034612,0.189349758353327,0.915087356191037,5,117,response to tumor necrosis factor,BP,hypergeometric,exon
GO:0034703,0.189593790020902,0.901669412225838,7,180,cation channel complex,CC,hypergeometric,exon
GO:0000414,0.190195225152197,0.982959448138397,1,8,regulation of histone H3-K36 methylation,BP,hypergeometric,exon
GO:0002176,0.190195225152197,0.982959448138397,1,8,male germ cell proliferation,BP,hypergeometric,exon
GO:0002756,0.190195225152197,0.982959448138397,1,8,MyD88-independent toll-like receptor signaling pathway,BP,hypergeometric,exon
GO:0004726,0.190195225152197,0.982959448138397,1,8,non-membrane spanning protein tyrosine phosphatase activity,MF,hypergeometric,exon
GO:0006108,0.190195225152197,0.982959448138397,1,8,malate metabolic process,BP,hypergeometric,exon
GO:0008191,0.190195225152197,0.982959448138397,1,8,metalloendopeptidase inhibitor activity,MF,hypergeometric,exon
GO:0010752,0.190195225152197,0.982959448138397,1,8,regulation of cGMP-mediated signaling,BP,hypergeometric,exon
GO:0010881,0.190195225152197,0.982959448138397,1,8,regulation of cardiac muscle contraction by regulation of the release of sequestered calcium ion,BP,hypergeometric,exon
GO:0014842,0.190195225152197,0.982959448138397,1,8,regulation of skeletal muscle satellite cell proliferation,BP,hypergeometric,exon
GO:0015838,0.190195225152197,0.982959448138397,1,8,amino-acid betaine transport,BP,hypergeometric,exon
GO:0018242,0.190195225152197,0.982959448138397,1,8,protein O-linked glycosylation via serine,BP,hypergeometric,exon
GO:0021796,0.190195225152197,0.982959448138397,1,8,cerebral cortex regionalization,BP,hypergeometric,exon
GO:0030550,0.190195225152197,0.982959448138397,1,8,acetylcholine receptor inhibitor activity,MF,hypergeometric,exon
GO:0030553,0.190195225152197,0.982959448138397,1,8,cGMP binding,MF,hypergeometric,exon
GO:0032049,0.190195225152197,0.982959448138397,1,8,cardiolipin biosynthetic process,BP,hypergeometric,exon
GO:0032056,0.190195225152197,0.982959448138397,1,8,positive regulation of translation in response to stress,BP,hypergeometric,exon
GO:0032754,0.190195225152197,0.982959448138397,1,8,positive regulation of interleukin-5 production,BP,hypergeometric,exon
GO:0032825,0.190195225152197,0.982959448138397,1,8,positive regulation of natural killer cell differentiation,BP,hypergeometric,exon
GO:0033179,0.190195225152197,0.982959448138397,1,8,"proton-transporting V-type ATPase, V0 domain",CC,hypergeometric,exon
GO:0034464,0.190195225152197,0.982959448138397,1,8,BBSome,CC,hypergeometric,exon
GO:0034773,0.190195225152197,0.982959448138397,1,8,histone H4-K20 trimethylation,BP,hypergeometric,exon
GO:0035022,0.190195225152197,0.982959448138397,1,8,positive regulation of Rac protein signal transduction,BP,hypergeometric,exon
GO:0035672,0.190195225152197,0.982959448138397,1,8,oligopeptide transmembrane transport,BP,hypergeometric,exon
GO:0035701,0.190195225152197,0.982959448138397,1,8,hematopoietic stem cell migration,BP,hypergeometric,exon
GO:0042439,0.190195225152197,0.982959448138397,1,8,ethanolamine-containing compound metabolic process,BP,hypergeometric,exon
GO:0042796,0.190195225152197,0.982959448138397,1,8,snRNA transcription by RNA polymerase III,BP,hypergeometric,exon
GO:0045294,0.190195225152197,0.982959448138397,1,8,alpha-catenin binding,MF,hypergeometric,exon
GO:0045876,0.190195225152197,0.982959448138397,1,8,positive regulation of sister chromatid cohesion,BP,hypergeometric,exon
GO:0046549,0.190195225152197,0.982959448138397,1,8,retinal cone cell development,BP,hypergeometric,exon
GO:0047184,0.190195225152197,0.982959448138397,1,8,1-acylglycerophosphocholine O-acyltransferase activity,MF,hypergeometric,exon
GO:0050774,0.190195225152197,0.982959448138397,1,8,negative regulation of dendrite morphogenesis,BP,hypergeometric,exon
GO:0051388,0.190195225152197,0.982959448138397,1,8,positive regulation of neurotrophin TRK receptor signaling pathway,BP,hypergeometric,exon
GO:0061002,0.190195225152197,0.982959448138397,1,8,negative regulation of dendritic spine morphogenesis,BP,hypergeometric,exon
GO:0071635,0.190195225152197,0.982959448138397,1,8,negative regulation of transforming growth factor beta production,BP,hypergeometric,exon
GO:0071863,0.190195225152197,0.982959448138397,1,8,regulation of cell proliferation in bone marrow,BP,hypergeometric,exon
GO:0072319,0.190195225152197,0.982959448138397,1,8,vesicle uncoating,BP,hypergeometric,exon
GO:0086080,0.190195225152197,0.982959448138397,1,8,protein binding involved in heterotypic cell-cell adhesion,MF,hypergeometric,exon
GO:0090557,0.190195225152197,0.982959448138397,1,8,establishment of endothelial intestinal barrier,BP,hypergeometric,exon
GO:0097012,0.190195225152197,0.982959448138397,1,8,response to granulocyte macrophage colony-stimulating factor,BP,hypergeometric,exon
GO:0097027,0.190195225152197,0.982959448138397,1,8,ubiquitin-protein transferase activator activity,MF,hypergeometric,exon
GO:1901977,0.190195225152197,0.982959448138397,1,8,negative regulation of cell cycle checkpoint,BP,hypergeometric,exon
GO:1902231,0.190195225152197,0.982959448138397,1,8,positive regulation of intrinsic apoptotic signaling pathway in response to DNA damage,BP,hypergeometric,exon
GO:1905208,0.190195225152197,0.982959448138397,1,8,negative regulation of cardiocyte differentiation,BP,hypergeometric,exon
GO:1905274,0.190195225152197,0.982959448138397,1,8,regulation of modification of postsynaptic actin cytoskeleton,BP,hypergeometric,exon
GO:1990454,0.190195225152197,0.982959448138397,1,8,L-type voltage-gated calcium channel complex,CC,hypergeometric,exon
GO:2000049,0.190195225152197,0.982959448138397,1,8,positive regulation of cell-cell adhesion mediated by cadherin,BP,hypergeometric,exon
GO:2000197,0.190195225152197,0.982959448138397,1,8,regulation of ribonucleoprotein complex localization,BP,hypergeometric,exon
GO:2000674,0.190195225152197,0.982959448138397,1,8,regulation of type B pancreatic cell apoptotic process,BP,hypergeometric,exon
GO:2000809,0.190195225152197,0.982959448138397,1,8,positive regulation of synaptic vesicle clustering,BP,hypergeometric,exon
GO:0034219,0.190851762927506,0.923664420738408,4,87,carbohydrate transmembrane transport,BP,hypergeometric,exon
GO:0000281,0.191514068413721,0.936098053261616,3,58,mitotic cytokinesis,BP,hypergeometric,exon
GO:0006094,0.191514068413721,0.936098053261616,3,58,gluconeogenesis,BP,hypergeometric,exon
GO:0006611,0.191514068413721,0.936098053261616,3,58,protein export from nucleus,BP,hypergeometric,exon
GO:0030315,0.191514068413721,0.936098053261616,3,58,T-tubule,CC,hypergeometric,exon
GO:0045296,0.191514068413721,0.936098053261616,3,58,cadherin binding,MF,hypergeometric,exon
GO:0048525,0.191514068413721,0.936098053261616,3,58,negative regulation of viral process,BP,hypergeometric,exon
GO:0051279,0.191514068413721,0.936098053261616,3,58,regulation of release of sequestered calcium ion into cytosol,BP,hypergeometric,exon
GO:0061951,0.191514068413721,0.936098053261616,3,58,establishment of protein localization to plasma membrane,BP,hypergeometric,exon
GO:0000423,0.192541817768521,0.954114325720941,2,31,mitophagy,BP,hypergeometric,exon
GO:0003755,0.192541817768521,0.954114325720941,2,31,peptidyl-prolyl cis-trans isomerase activity,MF,hypergeometric,exon
GO:0021545,0.192541817768521,0.954114325720941,2,31,cranial nerve development,BP,hypergeometric,exon
GO:0046825,0.192541817768521,0.954114325720941,2,31,regulation of protein export from nucleus,BP,hypergeometric,exon
GO:0080008,0.192541817768521,0.954114325720941,2,31,Cul4-RING E3 ubiquitin ligase complex,CC,hypergeometric,exon
GO:0086009,0.192541817768521,0.954114325720941,2,31,membrane repolarization,BP,hypergeometric,exon
GO:0090140,0.192541817768521,0.954114325720941,2,31,regulation of mitochondrial fission,BP,hypergeometric,exon
GO:0140101,0.193851278375487,0.912384594147496,5,118,"catalytic activity, acting on a tRNA",MF,hypergeometric,exon
GO:2000377,0.193851278375487,0.912384594147496,5,118,regulation of reactive oxygen species metabolic process,BP,hypergeometric,exon
GO:0008168,0.19677395293315,0.896918957498818,7,182,methyltransferase activity,MF,hypergeometric,exon
GO:0006997,0.198390153957718,0.909635084899385,5,119,nucleus organization,BP,hypergeometric,exon
GO:0018022,0.198390153957718,0.909635084899385,5,119,peptidyl-lysine methylation,BP,hypergeometric,exon
GO:0065007,0.198417985827187,0.83023578428309,222,8209,biological regulation,BP,hypergeometric,exon
GO:0005911,0.199926376722596,0.872911234761063,13,383,cell-cell junction,CC,hypergeometric,exon
GO:0007155,0.20124220839754,0.850427976432426,29,945,cell adhesion,BP,hypergeometric,exon
GO:0017111,0.201847722444451,0.869144902403554,14,418,nucleoside-triphosphatase activity,MF,hypergeometric,exon
GO:0001223,0.202065331913265,0.950310894402648,2,32,transcription coactivator binding,MF,hypergeometric,exon
GO:0008175,0.202065331913265,0.950310894402648,2,32,tRNA methyltransferase activity,MF,hypergeometric,exon
GO:0019748,0.202065331913265,0.950310894402648,2,32,secondary metabolic process,BP,hypergeometric,exon
GO:0048854,0.202065331913265,0.950310894402648,2,32,brain morphogenesis,BP,hypergeometric,exon
GO:1901976,0.202065331913265,0.950310894402648,2,32,regulation of cell cycle checkpoint,BP,hypergeometric,exon
GO:1902562,0.202065331913265,0.950310894402648,2,32,H4 histone acetyltransferase complex,CC,hypergeometric,exon
GO:0048285,0.202412794832943,0.87103217088807,13,384,organelle fission,BP,hypergeometric,exon
GO:0030055,0.204806045321186,0.897862162511169,6,152,cell-substrate junction,CC,hypergeometric,exon
GO:0030246,0.204806045321186,0.897862162511169,6,152,carbohydrate binding,MF,hypergeometric,exon
GO:0019319,0.204887523172272,0.929397313472499,3,60,hexose biosynthetic process,BP,hypergeometric,exon
GO:0032507,0.204887523172272,0.929397313472499,3,60,maintenance of protein location in cell,BP,hypergeometric,exon
GO:0010604,0.205224949675466,0.83132195870675,70,2446,positive regulation of macromolecule metabolic process,BP,hypergeometric,exon
GO:0022610,0.206037716786408,0.846425990857367,29,948,biological adhesion,BP,hypergeometric,exon
GO:0008152,0.206557792240245,0.822698330903675,217,8026,metabolic process,BP,hypergeometric,exon
GO:1902911,0.206920998768298,0.914585600794115,4,90,protein kinase complex,CC,hypergeometric,exon
GO:2000177,0.206920998768298,0.914585600794115,4,90,regulation of neural precursor cell proliferation,BP,hypergeometric,exon
GO:0030705,0.207741675860482,0.889557187358171,7,185,cytoskeleton-dependent intracellular transport,BP,hypergeometric,exon
GO:0051960,0.207859902487721,0.862392621948006,15,455,regulation of nervous system development,BP,hypergeometric,exon
GO:0051235,0.208138507059616,0.879501969841777,9,251,maintenance of location,BP,hypergeometric,exon
GO:0035770,0.208599199445755,0.883663813691223,8,218,ribonucleoprotein granule,CC,hypergeometric,exon
GO:0043229,0.209200174323165,0.822292712308423,258,9622,intracellular organelle,CC,hypergeometric,exon
GO:0060271,0.209761631967618,0.874462535671328,10,285,cilium assembly,BP,hypergeometric,exon
GO:0014706,0.210453416100962,0.8705680669049,11,319,striated muscle tissue development,BP,hypergeometric,exon
GO:0008015,0.210461007473241,0.867574443552156,12,353,blood circulation,BP,hypergeometric,exon
GO:0061061,0.210909039626296,0.858052076032038,16,491,muscle structure development,BP,hypergeometric,exon
GO:0000805,0.211277608096734,0.978463838404102,1,9,X chromosome,CC,hypergeometric,exon
GO:0002836,0.211277608096734,0.978463838404102,1,9,positive regulation of response to tumor cell,BP,hypergeometric,exon
GO:0002839,0.211277608096734,0.978463838404102,1,9,positive regulation of immune response to tumor cell,BP,hypergeometric,exon
GO:0005432,0.211277608096734,0.978463838404102,1,9,calcium:sodium antiporter activity,MF,hypergeometric,exon
GO:0005523,0.211277608096734,0.978463838404102,1,9,tropomyosin binding,MF,hypergeometric,exon
GO:0005916,0.211277608096734,0.978463838404102,1,9,fascia adherens,CC,hypergeometric,exon
GO:0006655,0.211277608096734,0.978463838404102,1,9,phosphatidylglycerol biosynthetic process,BP,hypergeometric,exon
GO:0007210,0.211277608096734,0.978463838404102,1,9,serotonin receptor signaling pathway,BP,hypergeometric,exon
GO:0008216,0.211277608096734,0.978463838404102,1,9,spermidine metabolic process,BP,hypergeometric,exon
GO:0008239,0.211277608096734,0.978463838404102,1,9,dipeptidyl-peptidase activity,MF,hypergeometric,exon
GO:0008331,0.211277608096734,0.978463838404102,1,9,high voltage-gated calcium channel activity,MF,hypergeometric,exon
GO:0010216,0.211277608096734,0.978463838404102,1,9,maintenance of DNA methylation,BP,hypergeometric,exon
GO:0010839,0.211277608096734,0.978463838404102,1,9,negative regulation of keratinocyte proliferation,BP,hypergeometric,exon
GO:0014889,0.211277608096734,0.978463838404102,1,9,muscle atrophy,BP,hypergeometric,exon
GO:0021604,0.211277608096734,0.978463838404102,1,9,cranial nerve structural organization,BP,hypergeometric,exon
GO:0030346,0.211277608096734,0.978463838404102,1,9,protein phosphatase 2B binding,MF,hypergeometric,exon
GO:0030853,0.211277608096734,0.978463838404102,1,9,negative regulation of granulocyte differentiation,BP,hypergeometric,exon
GO:0032060,0.211277608096734,0.978463838404102,1,9,bleb assembly,BP,hypergeometric,exon
GO:0034046,0.211277608096734,0.978463838404102,1,9,poly(G) binding,MF,hypergeometric,exon
GO:0034992,0.211277608096734,0.978463838404102,1,9,microtubule organizing center attachment site,CC,hypergeometric,exon
GO:0034993,0.211277608096734,0.978463838404102,1,9,meiotic nuclear membrane microtubule tethering complex,CC,hypergeometric,exon
GO:0035520,0.211277608096734,0.978463838404102,1,9,monoubiquitinated protein deubiquitination,BP,hypergeometric,exon
GO:0035673,0.211277608096734,0.978463838404102,1,9,oligopeptide transmembrane transporter activity,MF,hypergeometric,exon
GO:0036093,0.211277608096734,0.978463838404102,1,9,germ cell proliferation,BP,hypergeometric,exon
GO:0038063,0.211277608096734,0.978463838404102,1,9,collagen-activated tyrosine kinase receptor signaling pathway,BP,hypergeometric,exon
GO:0042182,0.211277608096734,0.978463838404102,1,9,ketone catabolic process,BP,hypergeometric,exon
GO:0042670,0.211277608096734,0.978463838404102,1,9,retinal cone cell differentiation,BP,hypergeometric,exon
GO:0043196,0.211277608096734,0.978463838404102,1,9,varicosity,CC,hypergeometric,exon
GO:0043373,0.211277608096734,0.978463838404102,1,9,"CD4-positive, alpha-beta T cell lineage commitment",BP,hypergeometric,exon
GO:0045141,0.211277608096734,0.978463838404102,1,9,meiotic telomere clustering,BP,hypergeometric,exon
GO:0045159,0.211277608096734,0.978463838404102,1,9,myosin II binding,MF,hypergeometric,exon
GO:0045762,0.211277608096734,0.978463838404102,1,9,positive regulation of adenylate cyclase activity,BP,hypergeometric,exon
GO:0050897,0.211277608096734,0.978463838404102,1,9,cobalt ion binding,MF,hypergeometric,exon
GO:0051292,0.211277608096734,0.978463838404102,1,9,nuclear pore complex assembly,BP,hypergeometric,exon
GO:0051371,0.211277608096734,0.978463838404102,1,9,muscle alpha-actinin binding,MF,hypergeometric,exon
GO:0051451,0.211277608096734,0.978463838404102,1,9,myoblast migration,BP,hypergeometric,exon
GO:0051797,0.211277608096734,0.978463838404102,1,9,regulation of hair follicle development,BP,hypergeometric,exon
GO:0060192,0.211277608096734,0.978463838404102,1,9,negative regulation of lipase activity,BP,hypergeometric,exon
GO:0061085,0.211277608096734,0.978463838404102,1,9,regulation of histone H3-K27 methylation,BP,hypergeometric,exon
GO:0070567,0.211277608096734,0.978463838404102,1,9,cytidylyltransferase activity,MF,hypergeometric,exon
GO:0071372,0.211277608096734,0.978463838404102,1,9,cellular response to follicle-stimulating hormone stimulus,BP,hypergeometric,exon
GO:0071599,0.211277608096734,0.978463838404102,1,9,otic vesicle development,BP,hypergeometric,exon
GO:0071838,0.211277608096734,0.978463838404102,1,9,cell proliferation in bone marrow,BP,hypergeometric,exon
GO:0071871,0.211277608096734,0.978463838404102,1,9,response to epinephrine,BP,hypergeometric,exon
GO:0071872,0.211277608096734,0.978463838404102,1,9,cellular response to epinephrine stimulus,BP,hypergeometric,exon
GO:0097104,0.211277608096734,0.978463838404102,1,9,postsynaptic membrane assembly,BP,hypergeometric,exon
GO:0097692,0.211277608096734,0.978463838404102,1,9,histone H3-K4 monomethylation,BP,hypergeometric,exon
GO:0098664,0.211277608096734,0.978463838404102,1,9,G protein-coupled serotonin receptor signaling pathway,BP,hypergeometric,exon
GO:0099571,0.211277608096734,0.978463838404102,1,9,postsynaptic cytoskeleton,CC,hypergeometric,exon
GO:0106083,0.211277608096734,0.978463838404102,1,9,nuclear membrane protein complex,CC,hypergeometric,exon
GO:0106094,0.211277608096734,0.978463838404102,1,9,nuclear membrane microtubule tethering complex,CC,hypergeometric,exon
GO:0120103,0.211277608096734,0.978463838404102,1,9,centriolar subdistal appendage,CC,hypergeometric,exon
GO:0140042,0.211277608096734,0.978463838404102,1,9,lipid droplet formation,BP,hypergeometric,exon
GO:1900454,0.211277608096734,0.978463838404102,1,9,positive regulation of long-term synaptic depression,BP,hypergeometric,exon
GO:1901533,0.211277608096734,0.978463838404102,1,9,negative regulation of hematopoietic progenitor cell differentiation,BP,hypergeometric,exon
GO:1901612,0.211277608096734,0.978463838404102,1,9,cardiolipin binding,MF,hypergeometric,exon
GO:1901678,0.211277608096734,0.978463838404102,1,9,iron coordination entity transport,BP,hypergeometric,exon
GO:1901679,0.211277608096734,0.978463838404102,1,9,nucleotide transmembrane transport,BP,hypergeometric,exon
GO:1902033,0.211277608096734,0.978463838404102,1,9,regulation of hematopoietic stem cell proliferation,BP,hypergeometric,exon
GO:1903025,0.211277608096734,0.978463838404102,1,9,regulation of RNA polymerase II regulatory region sequence-specific DNA binding,BP,hypergeometric,exon
GO:1903236,0.211277608096734,0.978463838404102,1,9,regulation of leukocyte tethering or rolling,BP,hypergeometric,exon
GO:1903430,0.211277608096734,0.978463838404102,1,9,negative regulation of cell maturation,BP,hypergeometric,exon
GO:1904354,0.211277608096734,0.978463838404102,1,9,negative regulation of telomere capping,BP,hypergeometric,exon
GO:1904749,0.211277608096734,0.978463838404102,1,9,regulation of protein localization to nucleolus,BP,hypergeometric,exon
GO:1904779,0.211277608096734,0.978463838404102,1,9,regulation of protein localization to centrosome,BP,hypergeometric,exon
GO:1990459,0.211277608096734,0.978463838404102,1,9,transferrin receptor binding,MF,hypergeometric,exon
GO:2001269,0.211277608096734,0.978463838404102,1,9,positive regulation of cysteine-type endopeptidase activity involved in apoptotic signaling pathway,BP,hypergeometric,exon
GO:0016859,0.211641084660294,0.946358835665683,2,33,cis-trans isomerase activity,MF,hypergeometric,exon
GO:0031369,0.211641084660294,0.946358835665683,2,33,translation initiation factor binding,MF,hypergeometric,exon
GO:0044743,0.211641084660294,0.946358835665683,2,33,protein transmembrane import into intracellular organelle,BP,hypergeometric,exon
GO:0045981,0.211641084660294,0.946358835665683,2,33,positive regulation of nucleotide metabolic process,BP,hypergeometric,exon
GO:1900087,0.211641084660294,0.946358835665683,2,33,positive regulation of G1/S transition of mitotic cell cycle,BP,hypergeometric,exon
GO:1900544,0.211641084660294,0.946358835665683,2,33,positive regulation of purine nucleotide metabolic process,BP,hypergeometric,exon
GO:1903421,0.211641084660294,0.946358835665683,2,33,regulation of synaptic vesicle recycling,BP,hypergeometric,exon
GO:0003678,0.211653279240098,0.925917094139022,3,61,DNA helicase activity,MF,hypergeometric,exon
GO:0006368,0.211653279240098,0.925917094139022,3,61,transcription elongation from RNA polymerase II promoter,BP,hypergeometric,exon
GO:0008173,0.211653279240098,0.925917094139022,3,61,RNA methyltransferase activity,MF,hypergeometric,exon
GO:0006941,0.212220402893832,0.901108542819993,5,122,striated muscle contraction,BP,hypergeometric,exon
GO:0008233,0.212496973442341,0.863358307332626,13,388,peptidase activity,MF,hypergeometric,exon
GO:0043604,0.214353538380312,0.847538771923044,21,668,amide biosynthetic process,BP,hypergeometric,exon
GO:0007369,0.216898157993451,0.898174617457166,5,123,gastrulation,BP,hypergeometric,exon
GO:1903169,0.216898157993451,0.898174617457166,5,123,regulation of calcium ion transmembrane transport,BP,hypergeometric,exon
GO:0031058,0.217844382534449,0.90823169625134,4,92,positive regulation of histone modification,BP,hypergeometric,exon
GO:0043967,0.218467080083306,0.922351470676333,3,62,histone H4 acetylation,BP,hypergeometric,exon
GO:0016358,0.218731582458196,0.867873305923012,10,288,dendrite development,BP,hypergeometric,exon
GO:0003298,0.221259941734218,0.942260628522492,2,34,physiological muscle hypertrophy,BP,hypergeometric,exon
GO:0003301,0.221259941734218,0.942260628522492,2,34,physiological cardiac muscle hypertrophy,BP,hypergeometric,exon
GO:0019212,0.221259941734218,0.942260628522492,2,34,phosphatase inhibitor activity,MF,hypergeometric,exon
GO:0030521,0.221259941734218,0.942260628522492,2,34,androgen receptor signaling pathway,BP,hypergeometric,exon
GO:0051647,0.221259941734218,0.942260628522492,2,34,nucleus localization,BP,hypergeometric,exon
GO:0061049,0.221259941734218,0.942260628522492,2,34,cell growth involved in cardiac muscle cell development,BP,hypergeometric,exon
GO:0097300,0.221259941734218,0.942260628522492,2,34,programmed necrotic cell death,BP,hypergeometric,exon
GO:1902003,0.221259941734218,0.942260628522492,2,34,regulation of amyloid-beta formation,BP,hypergeometric,exon
GO:1903580,0.221259941734218,0.942260628522492,2,34,positive regulation of ATP metabolic process,BP,hypergeometric,exon
GO:1903725,0.221259941734218,0.942260628522492,2,34,regulation of phospholipid metabolic process,BP,hypergeometric,exon
GO:0034702,0.22235746122564,0.873964128230118,8,222,ion channel complex,CC,hypergeometric,exon
GO:0003158,0.223363939335802,0.904965756295639,4,93,endothelium development,BP,hypergeometric,exon
GO:1903900,0.223363939335802,0.904965756295639,4,93,regulation of viral life cycle,BP,hypergeometric,exon
GO:0051983,0.225325504051978,0.918701399290126,3,63,regulation of chromosome segregation,BP,hypergeometric,exon
GO:0060076,0.225325504051978,0.918701399290126,3,63,excitatory synapse,CC,hypergeometric,exon
GO:1904035,0.225325504051978,0.918701399290126,3,63,regulation of epithelial cell apoptotic process,BP,hypergeometric,exon
GO:0016787,0.225426152045576,0.818736875927852,50,1725,hydrolase activity,MF,hypergeometric,exon
GO:0010970,0.225496662674825,0.88421205686814,6,157,transport along microtubule,BP,hypergeometric,exon
GO:0015630,0.226931182174278,0.826516659753244,32,1069,microtubule cytoskeleton,CC,hypergeometric,exon
GO:0007010,0.227795281924973,0.824406215515879,34,1142,cytoskeleton organization,BP,hypergeometric,exon
GO:0005856,0.228467839795547,0.815356779603582,52,1801,cytoskeleton,CC,hypergeometric,exon
GO:0033044,0.229715185908952,0.881372592589748,6,158,regulation of chromosome organization,BP,hypergeometric,exon
GO:0007017,0.229724511366299,0.832412045095186,23,747,microtubule-based process,BP,hypergeometric,exon
GO:0016741,0.230338141331788,0.87399801286298,7,191,"transferase activity, transferring one-carbon groups",MF,hypergeometric,exon
GO:0048738,0.230338141331788,0.87399801286298,7,191,cardiac muscle tissue development,BP,hypergeometric,exon
GO:0007608,0.230913206393914,0.938018925150756,2,35,sensory perception of smell,BP,hypergeometric,exon
GO:0009409,0.230913206393914,0.938018925150756,2,35,response to cold,BP,hypergeometric,exon
GO:0017145,0.230913206393914,0.938018925150756,2,35,stem cell division,BP,hypergeometric,exon
GO:0044325,0.231119455307317,0.889102062292392,5,126,transmembrane transporter binding,MF,hypergeometric,exon
GO:0051173,0.23127650000048,0.809659169423055,63,2210,positive regulation of nitrogen compound metabolic process,BP,hypergeometric,exon
GO:0001094,0.231812590916577,0.973537237281847,1,10,TFIID-class transcription factor complex binding,MF,hypergeometric,exon
GO:0001614,0.231812590916577,0.973537237281847,1,10,purinergic nucleotide receptor activity,MF,hypergeometric,exon
GO:0001840,0.231812590916577,0.973537237281847,1,10,neural plate development,BP,hypergeometric,exon
GO:0002162,0.231812590916577,0.973537237281847,1,10,dystroglycan binding,MF,hypergeometric,exon
GO:0002713,0.231812590916577,0.973537237281847,1,10,negative regulation of B cell mediated immunity,BP,hypergeometric,exon
GO:0002890,0.231812590916577,0.973537237281847,1,10,negative regulation of immunoglobulin mediated immune response,BP,hypergeometric,exon
GO:0004806,0.231812590916577,0.973537237281847,1,10,triglyceride lipase activity,MF,hypergeometric,exon
GO:0005883,0.231812590916577,0.973537237281847,1,10,neurofilament,CC,hypergeometric,exon
GO:0006020,0.231812590916577,0.973537237281847,1,10,inositol metabolic process,BP,hypergeometric,exon
GO:0008009,0.231812590916577,0.973537237281847,1,10,chemokine activity,MF,hypergeometric,exon
GO:0010960,0.231812590916577,0.973537237281847,1,10,magnesium ion homeostasis,BP,hypergeometric,exon
GO:0014841,0.231812590916577,0.973537237281847,1,10,skeletal muscle satellite cell proliferation,BP,hypergeometric,exon
GO:0015368,0.231812590916577,0.973537237281847,1,10,calcium:cation antiporter activity,MF,hypergeometric,exon
GO:0016502,0.231812590916577,0.973537237281847,1,10,nucleotide receptor activity,MF,hypergeometric,exon
GO:0018026,0.231812590916577,0.973537237281847,1,10,peptidyl-lysine monomethylation,BP,hypergeometric,exon
GO:0019227,0.231812590916577,0.973537237281847,1,10,neuronal action potential propagation,BP,hypergeometric,exon
GO:0021684,0.231812590916577,0.973537237281847,1,10,cerebellar granular layer formation,BP,hypergeometric,exon
GO:0021707,0.231812590916577,0.973537237281847,1,10,cerebellar granule cell differentiation,BP,hypergeometric,exon
GO:0021783,0.231812590916577,0.973537237281847,1,10,preganglionic parasympathetic fiber development,BP,hypergeometric,exon
GO:0030228,0.231812590916577,0.973537237281847,1,10,lipoprotein particle receptor activity,MF,hypergeometric,exon
GO:0031080,0.231812590916577,0.973537237281847,1,10,nuclear pore outer ring,CC,hypergeometric,exon
GO:0031698,0.231812590916577,0.973537237281847,1,10,beta-2 adrenergic receptor binding,MF,hypergeometric,exon
GO:0032328,0.231812590916577,0.973537237281847,1,10,alanine transport,BP,hypergeometric,exon
GO:0032354,0.231812590916577,0.973537237281847,1,10,response to follicle-stimulating hormone,BP,hypergeometric,exon
GO:0034397,0.231812590916577,0.973537237281847,1,10,telomere localization,BP,hypergeometric,exon
GO:0034452,0.231812590916577,0.973537237281847,1,10,dynactin binding,MF,hypergeometric,exon
GO:0036157,0.231812590916577,0.973537237281847,1,10,outer dynein arm,CC,hypergeometric,exon
GO:0038166,0.231812590916577,0.973537237281847,1,10,angiotensin-activated signaling pathway,BP,hypergeometric,exon
GO:0042813,0.231812590916577,0.973537237281847,1,10,Wnt-activated receptor activity,MF,hypergeometric,exon
GO:0043619,0.231812590916577,0.973537237281847,1,10,regulation of transcription from RNA polymerase II promoter in response to oxidative stress,BP,hypergeometric,exon
GO:0045059,0.231812590916577,0.973537237281847,1,10,positive thymic T cell selection,BP,hypergeometric,exon
GO:0045793,0.231812590916577,0.973537237281847,1,10,positive regulation of cell size,BP,hypergeometric,exon
GO:0045945,0.231812590916577,0.973537237281847,1,10,positive regulation of transcription by RNA polymerase III,BP,hypergeometric,exon
GO:0046185,0.231812590916577,0.973537237281847,1,10,aldehyde catabolic process,BP,hypergeometric,exon
GO:0046541,0.231812590916577,0.973537237281847,1,10,saliva secretion,BP,hypergeometric,exon
GO:0046975,0.231812590916577,0.973537237281847,1,10,histone methyltransferase activity (H3-K36 specific),MF,hypergeometric,exon
GO:0048495,0.231812590916577,0.973537237281847,1,10,Roundabout binding,MF,hypergeometric,exon
GO:0050847,0.231812590916577,0.973537237281847,1,10,progesterone receptor signaling pathway,BP,hypergeometric,exon
GO:0051378,0.231812590916577,0.973537237281847,1,10,serotonin binding,MF,hypergeometric,exon
GO:0051447,0.231812590916577,0.973537237281847,1,10,negative regulation of meiotic cell cycle,BP,hypergeometric,exon
GO:0060187,0.231812590916577,0.973537237281847,1,10,cell pole,CC,hypergeometric,exon
GO:0060712,0.231812590916577,0.973537237281847,1,10,spongiotrophoblast layer development,BP,hypergeometric,exon
GO:0061575,0.231812590916577,0.973537237281847,1,10,cyclin-dependent protein serine/threonine kinase activator activity,MF,hypergeometric,exon
GO:0070269,0.231812590916577,0.973537237281847,1,10,pyroptosis,BP,hypergeometric,exon
GO:0070989,0.231812590916577,0.973537237281847,1,10,oxidative demethylation,BP,hypergeometric,exon
GO:0070990,0.231812590916577,0.973537237281847,1,10,snRNP binding,MF,hypergeometric,exon
GO:0090148,0.231812590916577,0.973537237281847,1,10,membrane fission,BP,hypergeometric,exon
GO:0090220,0.231812590916577,0.973537237281847,1,10,chromosome localization to nuclear envelope involved in homologous chromosome segregation,BP,hypergeometric,exon
GO:0097119,0.231812590916577,0.973537237281847,1,10,postsynaptic density protein 95 clustering,BP,hypergeometric,exon
GO:0097441,0.231812590916577,0.973537237281847,1,10,basal dendrite,CC,hypergeometric,exon
GO:0097499,0.231812590916577,0.973537237281847,1,10,protein localization to non-motile cilium,BP,hypergeometric,exon
GO:0098870,0.231812590916577,0.973537237281847,1,10,action potential propagation,BP,hypergeometric,exon
GO:0099144,0.231812590916577,0.973537237281847,1,10,anchored component of synaptic membrane,CC,hypergeometric,exon
GO:1902036,0.231812590916577,0.973537237281847,1,10,regulation of hematopoietic stem cell differentiation,BP,hypergeometric,exon
GO:1902667,0.231812590916577,0.973537237281847,1,10,regulation of axon guidance,BP,hypergeometric,exon
GO:2000807,0.231812590916577,0.973537237281847,1,10,regulation of synaptic vesicle clustering,BP,hypergeometric,exon
GO:0010494,0.232225179675855,0.914967900300201,3,64,cytoplasmic stress granule,CC,hypergeometric,exon
GO:0016835,0.232225179675855,0.914967900300201,3,64,carbon-oxygen lyase activity,MF,hypergeometric,exon
GO:0032465,0.232225179675855,0.914967900300201,3,64,regulation of cytokinesis,BP,hypergeometric,exon
GO:0046364,0.232225179675855,0.914967900300201,3,64,monosaccharide biosynthetic process,BP,hypergeometric,exon
GO:0099111,0.234183852102465,0.871298500464668,7,192,microtubule-based transport,BP,hypergeometric,exon
GO:0031225,0.234509979276209,0.898258599760943,4,95,anchored component of membrane,CC,hypergeometric,exon
GO:0046660,0.234509979276209,0.898258599760943,4,95,female sex differentiation,BP,hypergeometric,exon
GO:0003713,0.236440942174904,0.863845312217963,8,226,transcription coactivator activity,MF,hypergeometric,exon
GO:0072659,0.237265218861041,0.858288066430973,9,260,protein localization to plasma membrane,BP,hypergeometric,exon
GO:0044237,0.238322780155584,0.793286485203555,202,7486,cellular metabolic process,BP,hypergeometric,exon
GO:0006942,0.239162787814805,0.911152055195772,3,65,regulation of striated muscle contraction,BP,hypergeometric,exon
GO:0051865,0.239162787814805,0.911152055195772,3,65,protein autoubiquitination,BP,hypergeometric,exon
GO:0097731,0.240132959129482,0.894818557349059,4,96,9+0 non-motile cilium,CC,hypergeometric,exon
GO:0000307,0.240592602952381,0.933636535100024,2,36,cyclin-dependent protein kinase holoenzyme complex,CC,hypergeometric,exon
GO:0004712,0.240592602952381,0.933636535100024,2,36,protein serine/threonine/tyrosine kinase activity,MF,hypergeometric,exon
GO:0015932,0.240592602952381,0.933636535100024,2,36,nucleobase-containing compound transmembrane transporter activity,MF,hypergeometric,exon
GO:0043001,0.240592602952381,0.933636535100024,2,36,Golgi to plasma membrane protein transport,BP,hypergeometric,exon
GO:0098631,0.240592602952381,0.933636535100024,2,36,cell adhesion mediator activity,MF,hypergeometric,exon
GO:2000242,0.240592602952381,0.933636535100024,2,36,negative regulation of reproductive process,BP,hypergeometric,exon
GO:0098797,0.241307527991606,0.840978705142407,13,399,plasma membrane protein complex,CC,hypergeometric,exon
GO:0048471,0.241871557347216,0.829543163117921,18,575,perinuclear region of cytoplasm,CC,hypergeometric,exon
GO:0071396,0.242192101128762,0.846539093001485,11,330,cellular response to lipid,BP,hypergeometric,exon
GO:0008514,0.245600157801355,0.879631029830266,5,129,organic anion transmembrane transporter activity,MF,hypergeometric,exon
GO:0097061,0.245786923190577,0.891321705290974,4,97,dendritic spine organization,BP,hypergeometric,exon
GO:0032587,0.246135063601715,0.907255003710313,3,66,ruffle membrane,CC,hypergeometric,exon
GO:0051651,0.246832912568171,0.869658551481651,6,162,maintenance of location in cell,BP,hypergeometric,exon
GO:0010629,0.247264542454851,0.817711729033167,23,756,negative regulation of gene expression,BP,hypergeometric,exon
GO:0009895,0.247287313056179,0.850809090646779,9,263,negative regulation of catabolic process,BP,hypergeometric,exon
GO:0000791,0.250290260854232,0.929116410330024,2,37,euchromatin,CC,hypergeometric,exon
GO:0010596,0.250290260854232,0.929116410330024,2,37,negative regulation of endothelial cell migration,BP,hypergeometric,exon
GO:0016538,0.250290260854232,0.929116410330024,2,37,cyclin-dependent protein serine/threonine kinase regulator activity,MF,hypergeometric,exon
GO:0018208,0.250290260854232,0.929116410330024,2,37,peptidyl-proline modification,BP,hypergeometric,exon
GO:0032040,0.250290260854232,0.929116410330024,2,37,small-subunit processome,CC,hypergeometric,exon
GO:0071889,0.250290260854232,0.929116410330024,2,37,14-3-3 protein binding,MF,hypergeometric,exon
GO:2000677,0.250290260854232,0.929116410330024,2,37,regulation of transcription regulatory region DNA binding,BP,hypergeometric,exon
GO:0008194,0.25147014139911,0.887768704709963,4,98,UDP-glycosyltransferase activity,MF,hypergeometric,exon
GO:0001865,0.251814348925347,0.968204989171125,1,11,NK T cell differentiation,BP,hypergeometric,exon
GO:0002363,0.251814348925347,0.968204989171125,1,11,alpha-beta T cell lineage commitment,BP,hypergeometric,exon
GO:0003906,0.251814348925347,0.968204989171125,1,11,DNA-(apurinic or apyrimidinic site) endonuclease activity,MF,hypergeometric,exon
GO:0005005,0.251814348925347,0.968204989171125,1,11,transmembrane-ephrin receptor activity,MF,hypergeometric,exon
GO:0005639,0.251814348925347,0.968204989171125,1,11,integral component of nuclear inner membrane,CC,hypergeometric,exon
GO:0006857,0.251814348925347,0.968204989171125,1,11,oligopeptide transport,BP,hypergeometric,exon
GO:0008093,0.251814348925347,0.968204989171125,1,11,cytoskeletal anchor activity,MF,hypergeometric,exon
GO:0008353,0.251814348925347,0.968204989171125,1,11,RNA polymerase II CTD heptapeptide repeat kinase activity,MF,hypergeometric,exon
GO:0014857,0.251814348925347,0.968204989171125,1,11,regulation of skeletal muscle cell proliferation,BP,hypergeometric,exon
GO:0015174,0.251814348925347,0.968204989171125,1,11,basic amino acid transmembrane transporter activity,MF,hypergeometric,exon
GO:0015271,0.251814348925347,0.968204989171125,1,11,outward rectifier potassium channel activity,MF,hypergeometric,exon
GO:0015279,0.251814348925347,0.968204989171125,1,11,store-operated calcium channel activity,MF,hypergeometric,exon
GO:0021554,0.251814348925347,0.968204989171125,1,11,optic nerve development,BP,hypergeometric,exon
GO:0021683,0.251814348925347,0.968204989171125,1,11,cerebellar granular layer morphogenesis,BP,hypergeometric,exon
GO:0031126,0.251814348925347,0.968204989171125,1,11,sno(s)RNA 3'-end processing,BP,hypergeometric,exon
GO:0031229,0.251814348925347,0.968204989171125,1,11,intrinsic component of nuclear inner membrane,CC,hypergeometric,exon
GO:0031340,0.251814348925347,0.968204989171125,1,11,positive regulation of vesicle fusion,BP,hypergeometric,exon
GO:0031464,0.251814348925347,0.968204989171125,1,11,Cul4A-RING E3 ubiquitin ligase complex,CC,hypergeometric,exon
GO:0032634,0.251814348925347,0.968204989171125,1,11,interleukin-5 production,BP,hypergeometric,exon
GO:0032674,0.251814348925347,0.968204989171125,1,11,regulation of interleukin-5 production,BP,hypergeometric,exon
GO:0032823,0.251814348925347,0.968204989171125,1,11,regulation of natural killer cell differentiation,BP,hypergeometric,exon
GO:0034770,0.251814348925347,0.968204989171125,1,11,histone H4-K20 methylation,BP,hypergeometric,exon
GO:0035331,0.251814348925347,0.968204989171125,1,11,negative regulation of hippo signaling,BP,hypergeometric,exon
GO:0035612,0.251814348925347,0.968204989171125,1,11,AP-2 adaptor complex binding,MF,hypergeometric,exon
GO:0035845,0.251814348925347,0.968204989171125,1,11,photoreceptor cell outer segment organization,BP,hypergeometric,exon
GO:0036490,0.251814348925347,0.968204989171125,1,11,regulation of translation in response to endoplasmic reticulum stress,BP,hypergeometric,exon
GO:0042405,0.251814348925347,0.968204989171125,1,11,nuclear inclusion body,CC,hypergeometric,exon
GO:0043031,0.251814348925347,0.968204989171125,1,11,negative regulation of macrophage activation,BP,hypergeometric,exon
GO:0043256,0.251814348925347,0.968204989171125,1,11,laminin complex,CC,hypergeometric,exon
GO:0043374,0.251814348925347,0.968204989171125,1,11,"CD8-positive, alpha-beta T cell differentiation",BP,hypergeometric,exon
GO:0044327,0.251814348925347,0.968204989171125,1,11,dendritic spine head,CC,hypergeometric,exon
GO:0046058,0.251814348925347,0.968204989171125,1,11,cAMP metabolic process,BP,hypergeometric,exon
GO:0048020,0.251814348925347,0.968204989171125,1,11,CCR chemokine receptor binding,MF,hypergeometric,exon
GO:0048312,0.251814348925347,0.968204989171125,1,11,intracellular distribution of mitochondria,BP,hypergeometric,exon
GO:0048486,0.251814348925347,0.968204989171125,1,11,parasympathetic nervous system development,BP,hypergeometric,exon
GO:0051044,0.251814348925347,0.968204989171125,1,11,positive regulation of membrane protein ectodomain proteolysis,BP,hypergeometric,exon
GO:0060013,0.251814348925347,0.968204989171125,1,11,righting reflex,BP,hypergeometric,exon
GO:0060736,0.251814348925347,0.968204989171125,1,11,prostate gland growth,BP,hypergeometric,exon
GO:0060973,0.251814348925347,0.968204989171125,1,11,cell migration involved in heart development,BP,hypergeometric,exon
GO:0061669,0.251814348925347,0.968204989171125,1,11,spontaneous neurotransmitter secretion,BP,hypergeometric,exon
GO:0070344,0.251814348925347,0.968204989171125,1,11,regulation of fat cell proliferation,BP,hypergeometric,exon
GO:0070933,0.251814348925347,0.968204989171125,1,11,histone H4 deacetylation,BP,hypergeometric,exon
GO:0071371,0.251814348925347,0.968204989171125,1,11,cellular response to gonadotropin stimulus,BP,hypergeometric,exon
GO:0071679,0.251814348925347,0.968204989171125,1,11,commissural neuron axon guidance,BP,hypergeometric,exon
GO:0090179,0.251814348925347,0.968204989171125,1,11,planar cell polarity pathway involved in neural tube closure,BP,hypergeometric,exon
GO:0098644,0.251814348925347,0.968204989171125,1,11,complex of collagen trimers,CC,hypergeometric,exon
GO:0099171,0.251814348925347,0.968204989171125,1,11,presynaptic modulation of chemical synaptic transmission,BP,hypergeometric,exon
GO:0140059,0.251814348925347,0.968204989171125,1,11,dendrite arborization,BP,hypergeometric,exon
GO:1900038,0.251814348925347,0.968204989171125,1,11,negative regulation of cellular response to hypoxia,BP,hypergeometric,exon
GO:1900044,0.251814348925347,0.968204989171125,1,11,regulation of protein K63-linked ubiquitination,BP,hypergeometric,exon
GO:1901142,0.251814348925347,0.968204989171125,1,11,insulin metabolic process,BP,hypergeometric,exon
GO:1901841,0.251814348925347,0.968204989171125,1,11,regulation of high voltage-gated calcium channel activity,BP,hypergeometric,exon
GO:1903977,0.251814348925347,0.968204989171125,1,11,positive regulation of glial cell migration,BP,hypergeometric,exon
GO:1904680,0.251814348925347,0.968204989171125,1,11,peptide transmembrane transporter activity,MF,hypergeometric,exon
GO:1990909,0.251814348925347,0.968204989171125,1,11,Wnt signalosome,CC,hypergeometric,exon
GO:0010976,0.25372164134482,0.857357604540918,7,197,positive regulation of neuron projection development,BP,hypergeometric,exon
GO:0030036,0.255464348350559,0.818333820951913,18,581,actin cytoskeleton organization,BP,hypergeometric,exon
GO:0021987,0.257180894492675,0.88416024457306,4,99,cerebral cortex development,BP,hypergeometric,exon
GO:0042752,0.257180894492675,0.88416024457306,4,99,regulation of circadian rhythm,BP,hypergeometric,exon
GO:0005730,0.257249026177731,0.809259043568659,23,761,nucleolus,CC,hypergeometric,exon
GO:0009893,0.257643473905172,0.783186355247416,75,2680,positive regulation of metabolic process,BP,hypergeometric,exon
GO:0005694,0.259390188004762,0.801922607652349,28,943,chromosome,CC,hypergeometric,exon
GO:0005637,0.259998699293077,0.924461631044962,2,38,nuclear inner membrane,CC,hypergeometric,exon
GO:0006509,0.259998699293077,0.924461631044962,2,38,membrane protein ectodomain proteolysis,BP,hypergeometric,exon
GO:0045197,0.259998699293077,0.924461631044962,2,38,establishment or maintenance of epithelial cell apical/basal polarity,BP,hypergeometric,exon
GO:0045776,0.259998699293077,0.924461631044962,2,38,negative regulation of blood pressure,BP,hypergeometric,exon
GO:0090317,0.259998699293077,0.924461631044962,2,38,negative regulation of intracellular protein transport,BP,hypergeometric,exon
GO:1901019,0.260170840307082,0.89922211437603,3,68,regulation of calcium ion transmembrane transporter activity,BP,hypergeometric,exon
GO:0031123,0.2629174751256,0.880497040697517,4,100,RNA 3'-end processing,BP,hypergeometric,exon
GO:0007160,0.264304834334494,0.857389054252867,6,166,cell-matrix adhesion,BP,hypergeometric,exon
GO:0001725,0.267228097650927,0.895088821257511,3,69,stress fiber,CC,hypergeometric,exon
GO:0004252,0.267228097650927,0.895088821257511,3,69,serine-type endopeptidase activity,MF,hypergeometric,exon
GO:0097517,0.267228097650927,0.895088821257511,3,69,contractile actin filament bundle,CC,hypergeometric,exon
GO:0009894,0.267395454170646,0.800607583354382,23,766,regulation of catabolic process,BP,hypergeometric,exon
GO:0060048,0.268678188935054,0.876779834753655,4,101,cardiac muscle contraction,BP,hypergeometric,exon
GO:0006110,0.269710812351593,0.919675392289479,2,39,regulation of glycolytic process,BP,hypergeometric,exon
GO:0072595,0.269710812351593,0.919675392289479,2,39,maintenance of protein localization in organelle,BP,hypergeometric,exon
GO:0098926,0.269710812351593,0.919675392289479,2,39,postsynaptic signal transduction,BP,hypergeometric,exon
GO:1902808,0.269710812351593,0.919675392289479,2,39,positive regulation of cell cycle G1/S phase transition,BP,hypergeometric,exon
GO:1903426,0.269710812351593,0.919675392289479,2,39,regulation of reactive oxygen species biosynthetic process,BP,hypergeometric,exon
GO:0008016,0.270231829643005,0.862991279712535,5,134,regulation of heart contraction,BP,hypergeometric,exon
GO:0048518,0.271124803901659,0.764827115213609,123,4503,positive regulation of biological process,BP,hypergeometric,exon
GO:0006913,0.271208349555245,0.832597498900962,9,270,nucleocytoplasmic transport,BP,hypergeometric,exon
GO:0051169,0.271208349555245,0.832597498900962,9,270,nuclear transport,BP,hypergeometric,exon
GO:0000812,0.271296691336614,0.96249141759859,1,12,Swr1 complex,CC,hypergeometric,exon
GO:0001946,0.271296691336614,0.96249141759859,1,12,lymphangiogenesis,BP,hypergeometric,exon
GO:0002862,0.271296691336614,0.96249141759859,1,12,negative regulation of inflammatory response to antigenic stimulus,BP,hypergeometric,exon
GO:0004115,0.271296691336614,0.96249141759859,1,12,"3',5'-cyclic-AMP phosphodiesterase activity",MF,hypergeometric,exon
GO:0004707,0.271296691336614,0.96249141759859,1,12,MAP kinase activity,MF,hypergeometric,exon
GO:0005003,0.271296691336614,0.96249141759859,1,12,ephrin receptor activity,MF,hypergeometric,exon
GO:0005078,0.271296691336614,0.96249141759859,1,12,MAP-kinase scaffold activity,MF,hypergeometric,exon
GO:0005283,0.271296691336614,0.96249141759859,1,12,amino acid:sodium symporter activity,MF,hypergeometric,exon
GO:0005522,0.271296691336614,0.96249141759859,1,12,profilin binding,MF,hypergeometric,exon
GO:0005537,0.271296691336614,0.96249141759859,1,12,mannose binding,MF,hypergeometric,exon
GO:0008540,0.271296691336614,0.96249141759859,1,12,"proteasome regulatory particle, base subcomplex",CC,hypergeometric,exon
GO:0008559,0.271296691336614,0.96249141759859,1,12,ABC-type xenobiotic transporter activity,MF,hypergeometric,exon
GO:0010457,0.271296691336614,0.96249141759859,1,12,centriole-centriole cohesion,BP,hypergeometric,exon
GO:0010644,0.271296691336614,0.96249141759859,1,12,cell communication by electrical coupling,BP,hypergeometric,exon
GO:0010882,0.271296691336614,0.96249141759859,1,12,regulation of cardiac muscle contraction by calcium ion signaling,BP,hypergeometric,exon
GO:0015701,0.271296691336614,0.96249141759859,1,12,bicarbonate transport,BP,hypergeometric,exon
GO:0016558,0.271296691336614,0.96249141759859,1,12,protein import into peroxisome matrix,BP,hypergeometric,exon
GO:0017166,0.271296691336614,0.96249141759859,1,12,vinculin binding,MF,hypergeometric,exon
GO:0021978,0.271296691336614,0.96249141759859,1,12,telencephalon regionalization,BP,hypergeometric,exon
GO:0030206,0.271296691336614,0.96249141759859,1,12,chondroitin sulfate biosynthetic process,BP,hypergeometric,exon
GO:0033127,0.271296691336614,0.96249141759859,1,12,regulation of histone phosphorylation,BP,hypergeometric,exon
GO:0034698,0.271296691336614,0.96249141759859,1,12,response to gonadotropin,BP,hypergeometric,exon
GO:0038065,0.271296691336614,0.96249141759859,1,12,collagen-activated signaling pathway,BP,hypergeometric,exon
GO:0042994,0.271296691336614,0.96249141759859,1,12,cytoplasmic sequestering of transcription factor,BP,hypergeometric,exon
GO:0043144,0.271296691336614,0.96249141759859,1,12,sno(s)RNA processing,BP,hypergeometric,exon
GO:0043248,0.271296691336614,0.96249141759859,1,12,proteasome assembly,BP,hypergeometric,exon
GO:0043455,0.271296691336614,0.96249141759859,1,12,regulation of secondary metabolic process,BP,hypergeometric,exon
GO:0043652,0.271296691336614,0.96249141759859,1,12,engulfment of apoptotic cell,BP,hypergeometric,exon
GO:0044615,0.271296691336614,0.96249141759859,1,12,nuclear pore nuclear basket,CC,hypergeometric,exon
GO:0045217,0.271296691336614,0.96249141759859,1,12,cell-cell junction maintenance,BP,hypergeometric,exon
GO:0048021,0.271296691336614,0.96249141759859,1,12,regulation of melanin biosynthetic process,BP,hypergeometric,exon
GO:0048103,0.271296691336614,0.96249141759859,1,12,somatic stem cell division,BP,hypergeometric,exon
GO:0070341,0.271296691336614,0.96249141759859,1,12,fat cell proliferation,BP,hypergeometric,exon
GO:0070742,0.271296691336614,0.96249141759859,1,12,C2H2 zinc finger domain binding,MF,hypergeometric,exon
GO:0070816,0.271296691336614,0.96249141759859,1,12,phosphorylation of RNA polymerase II C-terminal domain,BP,hypergeometric,exon
GO:0070831,0.271296691336614,0.96249141759859,1,12,basement membrane assembly,BP,hypergeometric,exon
GO:0071564,0.271296691336614,0.96249141759859,1,12,npBAF complex,CC,hypergeometric,exon
GO:0072393,0.271296691336614,0.96249141759859,1,12,microtubule anchoring at microtubule organizing center,BP,hypergeometric,exon
GO:0086103,0.271296691336614,0.96249141759859,1,12,G protein-coupled receptor signaling pathway involved in heart process,BP,hypergeometric,exon
GO:0090178,0.271296691336614,0.96249141759859,1,12,regulation of establishment of planar polarity involved in neural tube closure,BP,hypergeometric,exon
GO:0097542,0.271296691336614,0.96249141759859,1,12,ciliary tip,CC,hypergeometric,exon
GO:1900244,0.271296691336614,0.96249141759859,1,12,positive regulation of synaptic vesicle endocytosis,BP,hypergeometric,exon
GO:1900376,0.271296691336614,0.96249141759859,1,12,regulation of secondary metabolite biosynthetic process,BP,hypergeometric,exon
GO:1901611,0.271296691336614,0.96249141759859,1,12,phosphatidylglycerol binding,MF,hypergeometric,exon
GO:1901741,0.271296691336614,0.96249141759859,1,12,positive regulation of myoblast fusion,BP,hypergeometric,exon
GO:1902306,0.271296691336614,0.96249141759859,1,12,negative regulation of sodium ion transmembrane transport,BP,hypergeometric,exon
GO:1902916,0.271296691336614,0.96249141759859,1,12,positive regulation of protein polyubiquitination,BP,hypergeometric,exon
GO:1990226,0.271296691336614,0.96249141759859,1,12,histone methyltransferase binding,MF,hypergeometric,exon
GO:2000650,0.271296691336614,0.96249141759859,1,12,negative regulation of sodium ion transmembrane transporter activity,BP,hypergeometric,exon
GO:2001241,0.271296691336614,0.96249141759859,1,12,positive regulation of extrinsic apoptotic signaling pathway in absence of ligand,BP,hypergeometric,exon
GO:0032502,0.27218619777714,0.763699519419503,125,4580,developmental process,BP,hypergeometric,exon
GO:0040007,0.272529390480938,0.793728404383799,25,841,growth,BP,hypergeometric,exon
GO:0031032,0.273158674339638,0.851052645085913,6,168,actomyosin structure organization,BP,hypergeometric,exon
GO:0004866,0.274307538093997,0.89087940557764,3,70,endopeptidase inhibitor activity,MF,hypergeometric,exon
GO:0005811,0.274307538093997,0.89087940557764,3,70,lipid droplet,CC,hypergeometric,exon
GO:0001952,0.274461355555488,0.87300939326558,4,102,regulation of cell-matrix adhesion,BP,hypergeometric,exon
GO:0042692,0.275479247426827,0.824554501252225,10,306,muscle cell differentiation,BP,hypergeometric,exon
GO:0033218,0.278168542028948,0.827204683311052,9,272,amide binding,MF,hypergeometric,exon
GO:0099537,0.278845080359593,0.796922008197267,19,627,trans-synaptic signaling,BP,hypergeometric,exon
GO:0005871,0.279419854647638,0.91476099127327,2,40,kinesin complex,CC,hypergeometric,exon
GO:0010799,0.279419854647638,0.91476099127327,2,40,regulation of peptidyl-threonine phosphorylation,BP,hypergeometric,exon
GO:0046676,0.279419854647638,0.91476099127327,2,40,negative regulation of insulin secretion,BP,hypergeometric,exon
GO:0050879,0.279419854647638,0.91476099127327,2,40,multicellular organismal movement,BP,hypergeometric,exon
GO:0050881,0.279419854647638,0.91476099127327,2,40,musculoskeletal movement,BP,hypergeometric,exon
GO:1902991,0.279419854647638,0.91476099127327,2,40,regulation of amyloid precursor protein catabolic process,BP,hypergeometric,exon
GO:0018193,0.279761704200993,0.784200360067589,28,954,peptidyl-amino acid modification,BP,hypergeometric,exon
GO:0030048,0.280265309582422,0.869186506611145,4,103,actin filament-based movement,BP,hypergeometric,exon
GO:0099504,0.281840672285537,0.836643512540243,7,204,synaptic vesicle cycle,BP,hypergeometric,exon
GO:0048593,0.286088401486619,0.865311988022496,4,104,camera-type eye morphogenesis,BP,hypergeometric,exon
GO:0000118,0.288521146877502,0.88223780020847,3,72,histone deacetylase complex,CC,hypergeometric,exon
GO:0030414,0.288521146877502,0.88223780020847,3,72,peptidase inhibitor activity,MF,hypergeometric,exon
GO:0030864,0.288521146877502,0.88223780020847,3,72,cortical actin cytoskeleton,CC,hypergeometric,exon
GO:0060021,0.288521146877502,0.88223780020847,3,72,roof of mouth development,BP,hypergeometric,exon
GO:1900182,0.288521146877502,0.88223780020847,3,72,positive regulation of protein localization to nucleus,BP,hypergeometric,exon
GO:0044782,0.288671913025716,0.814094392139732,10,310,cilium organization,BP,hypergeometric,exon
GO:0005048,0.289119427470217,0.909721815392635,2,41,signal sequence binding,MF,hypergeometric,exon
GO:0030593,0.289119427470217,0.909721815392635,2,41,neutrophil chemotaxis,BP,hypergeometric,exon
GO:0035019,0.289119427470217,0.909721815392635,2,41,somatic stem cell population maintenance,BP,hypergeometric,exon
GO:0042461,0.289119427470217,0.909721815392635,2,41,photoreceptor cell development,BP,hypergeometric,exon
GO:0050919,0.289119427470217,0.909721815392635,2,41,negative chemotaxis,BP,hypergeometric,exon
GO:0070830,0.289119427470217,0.909721815392635,2,41,bicellular tight junction assembly,BP,hypergeometric,exon
GO:0001976,0.290273070693704,0.95641986094846,1,13,nervous system process involved in regulation of systemic arterial blood pressure,BP,hypergeometric,exon
GO:0002834,0.290273070693704,0.95641986094846,1,13,regulation of response to tumor cell,BP,hypergeometric,exon
GO:0002837,0.290273070693704,0.95641986094846,1,13,regulation of immune response to tumor cell,BP,hypergeometric,exon
GO:0005614,0.290273070693704,0.95641986094846,1,13,interstitial matrix,CC,hypergeometric,exon
GO:0005652,0.290273070693704,0.95641986094846,1,13,nuclear lamina,CC,hypergeometric,exon
GO:0010452,0.290273070693704,0.95641986094846,1,13,histone H3-K36 methylation,BP,hypergeometric,exon
GO:0014856,0.290273070693704,0.95641986094846,1,13,skeletal muscle cell proliferation,BP,hypergeometric,exon
GO:0015106,0.290273070693704,0.95641986094846,1,13,bicarbonate transmembrane transporter activity,MF,hypergeometric,exon
GO:0015562,0.290273070693704,0.95641986094846,1,13,efflux transmembrane transporter activity,MF,hypergeometric,exon
GO:0015697,0.290273070693704,0.95641986094846,1,13,quaternary ammonium group transport,BP,hypergeometric,exon
GO:0015868,0.290273070693704,0.95641986094846,1,13,purine ribonucleotide transport,BP,hypergeometric,exon
GO:0016081,0.290273070693704,0.95641986094846,1,13,synaptic vesicle docking,BP,hypergeometric,exon
GO:0022821,0.290273070693704,0.95641986094846,1,13,potassium ion antiporter activity,MF,hypergeometric,exon
GO:0030057,0.290273070693704,0.95641986094846,1,13,desmosome,CC,hypergeometric,exon
GO:0030688,0.290273070693704,0.95641986094846,1,13,"preribosome, small subunit precursor",CC,hypergeometric,exon
GO:0031005,0.290273070693704,0.95641986094846,1,13,filamin binding,MF,hypergeometric,exon
GO:0031054,0.290273070693704,0.95641986094846,1,13,pre-miRNA processing,BP,hypergeometric,exon
GO:0031987,0.290273070693704,0.95641986094846,1,13,locomotion involved in locomotory behavior,BP,hypergeometric,exon
GO:0033194,0.290273070693704,0.95641986094846,1,13,response to hydroperoxide,BP,hypergeometric,exon
GO:0035461,0.290273070693704,0.95641986094846,1,13,vitamin transmembrane transport,BP,hypergeometric,exon
GO:0036038,0.290273070693704,0.95641986094846,1,13,MKS complex,CC,hypergeometric,exon
GO:0036303,0.290273070693704,0.95641986094846,1,13,lymph vessel morphogenesis,BP,hypergeometric,exon
GO:0042795,0.290273070693704,0.95641986094846,1,13,snRNA transcription by RNA polymerase II,BP,hypergeometric,exon
GO:0043023,0.290273070693704,0.95641986094846,1,13,ribosomal large subunit binding,MF,hypergeometric,exon
GO:0043369,0.290273070693704,0.95641986094846,1,13,"CD4-positive or CD8-positive, alpha-beta T cell lineage commitment",BP,hypergeometric,exon
GO:0045820,0.290273070693704,0.95641986094846,1,13,negative regulation of glycolytic process,BP,hypergeometric,exon
GO:0046831,0.290273070693704,0.95641986094846,1,13,regulation of RNA export from nucleus,BP,hypergeometric,exon
GO:0051119,0.290273070693704,0.95641986094846,1,13,sugar transmembrane transporter activity,MF,hypergeometric,exon
GO:0060026,0.290273070693704,0.95641986094846,1,13,convergent extension,BP,hypergeometric,exon
GO:0060213,0.290273070693704,0.95641986094846,1,13,positive regulation of nuclear-transcribed mRNA poly(A) tail shortening,BP,hypergeometric,exon
GO:0071014,0.290273070693704,0.95641986094846,1,13,post-mRNA release spliceosomal complex,CC,hypergeometric,exon
GO:0071398,0.290273070693704,0.95641986094846,1,13,cellular response to fatty acid,BP,hypergeometric,exon
GO:0090177,0.290273070693704,0.95641986094846,1,13,establishment of planar polarity involved in neural tube closure,BP,hypergeometric,exon
GO:0090239,0.290273070693704,0.95641986094846,1,13,regulation of histone H4 acetylation,BP,hypergeometric,exon
GO:0098576,0.290273070693704,0.95641986094846,1,13,lumenal side of membrane,CC,hypergeometric,exon
GO:0098935,0.290273070693704,0.95641986094846,1,13,dendritic transport,BP,hypergeometric,exon
GO:0099159,0.290273070693704,0.95641986094846,1,13,regulation of modification of postsynaptic structure,BP,hypergeometric,exon
GO:1901077,0.290273070693704,0.95641986094846,1,13,regulation of relaxation of muscle,BP,hypergeometric,exon
GO:1901160,0.290273070693704,0.95641986094846,1,13,primary amino compound metabolic process,BP,hypergeometric,exon
GO:1903727,0.290273070693704,0.95641986094846,1,13,positive regulation of phospholipid metabolic process,BP,hypergeometric,exon
GO:1904816,0.290273070693704,0.95641986094846,1,13,"positive regulation of protein localization to chromosome, telomeric region",BP,hypergeometric,exon
GO:1905168,0.290273070693704,0.95641986094846,1,13,positive regulation of double-strand break repair via homologous recombination,BP,hypergeometric,exon
GO:2000628,0.290273070693704,0.95641986094846,1,13,regulation of miRNA metabolic process,BP,hypergeometric,exon
GO:2000810,0.290273070693704,0.95641986094846,1,13,regulation of bicellular tight junction assembly,BP,hypergeometric,exon
GO:0000910,0.290307083031296,0.848944967666924,5,138,cytokinesis,BP,hypergeometric,exon
GO:0007623,0.291072124164295,0.837991250991416,6,172,circadian rhythm,BP,hypergeometric,exon
GO:0016323,0.291072124164295,0.837991250991416,6,172,basolateral plasma membrane,CC,hypergeometric,exon
GO:0045787,0.291699503263108,0.822357819181919,8,241,positive regulation of cell cycle,BP,hypergeometric,exon
GO:0106027,0.291928998479692,0.861386672588469,4,105,neuron projection organization,BP,hypergeometric,exon
GO:0031256,0.295368384643489,0.845335800175497,5,139,leading edge membrane,CC,hypergeometric,exon
GO:0048856,0.296089749448337,0.742121364952881,116,4262,anatomical structure development,BP,hypergeometric,exon
GO:0021537,0.29824481904127,0.824212464588384,7,208,telencephalon development,BP,hypergeometric,exon
GO:0031646,0.29880346538965,0.90456133091845,2,42,positive regulation of nervous system process,BP,hypergeometric,exon
GO:0060964,0.29880346538965,0.90456133091845,2,42,regulation of gene silencing by miRNA,BP,hypergeometric,exon
GO:0071347,0.29880346538965,0.90456133091845,2,42,cellular response to interleukin-1,BP,hypergeometric,exon
GO:0099738,0.29880346538965,0.90456133091845,2,42,cell cortex region,CC,hypergeometric,exon
GO:0030141,0.299308199003159,0.816428831894448,8,243,secretory granule,CC,hypergeometric,exon
GO:0046872,0.301983425267419,0.742211052861769,76,2755,metal ion binding,MF,hypergeometric,exon
GO:0046873,0.302036814236801,0.803352546205499,10,314,metal ion transmembrane transporter activity,MF,hypergeometric,exon
GO:0043227,0.302550796701651,0.735227753028417,244,9178,membrane-bounded organelle,CC,hypergeometric,exon
GO:0008135,0.302788649834675,0.873308883128875,3,74,"translation factor activity, RNA binding",MF,hypergeometric,exon
GO:0043169,0.302838223257596,0.741005451293217,78,2831,cation binding,MF,hypergeometric,exon
GO:0031226,0.303444708457548,0.76553132284284,26,893,intrinsic component of plasma membrane,CC,hypergeometric,exon
GO:0055007,0.303656265145526,0.853387094860102,4,107,cardiac muscle cell differentiation,BP,hypergeometric,exon
GO:0000902,0.304068227969835,0.763840410747214,27,930,cell morphogenesis,BP,hypergeometric,exon
GO:0031346,0.305121075454287,0.792572540433123,12,386,positive regulation of cell projection organization,BP,hypergeometric,exon
GO:0140013,0.305534608696029,0.838004362601591,5,141,meiotic nuclear division,BP,hypergeometric,exon
GO:0005929,0.306120150089145,0.779908848756528,16,530,cilium,CC,hypergeometric,exon
GO:0045178,0.306524021515988,0.81784284916361,7,210,basal part of cell,CC,hypergeometric,exon
GO:0000768,0.308466223326767,0.899283072321247,2,43,syncytium formation by plasma membrane fusion,BP,hypergeometric,exon
GO:0016601,0.308466223326767,0.899283072321247,2,43,Rac protein signal transduction,BP,hypergeometric,exon
GO:0018198,0.308466223326767,0.899283072321247,2,43,peptidyl-cysteine modification,BP,hypergeometric,exon
GO:0045123,0.308466223326767,0.899283072321247,2,43,cellular extravasation,BP,hypergeometric,exon
GO:0060612,0.308466223326767,0.899283072321247,2,43,adipose tissue development,BP,hypergeometric,exon
GO:0072583,0.308466223326767,0.899283072321247,2,43,clathrin-dependent endocytosis,BP,hypergeometric,exon
GO:0086001,0.308466223326767,0.899283072321247,2,43,cardiac muscle cell action potential,BP,hypergeometric,exon
GO:0140253,0.308466223326767,0.899283072321247,2,43,cell-cell fusion,BP,hypergeometric,exon
GO:1903409,0.308466223326767,0.899283072321247,2,43,reactive oxygen species biosynthetic process,BP,hypergeometric,exon
GO:0000176,0.308756592057273,0.95001270703269,1,14,nuclear exosome (RNase complex),CC,hypergeometric,exon
GO:0002080,0.308756592057273,0.95001270703269,1,14,acrosomal membrane,CC,hypergeometric,exon
GO:0002418,0.308756592057273,0.95001270703269,1,14,immune response to tumor cell,BP,hypergeometric,exon
GO:0003323,0.308756592057273,0.95001270703269,1,14,type B pancreatic cell development,BP,hypergeometric,exon
GO:0004698,0.308756592057273,0.95001270703269,1,14,calcium-dependent protein kinase C activity,MF,hypergeometric,exon
GO:0005416,0.308756592057273,0.95001270703269,1,14,amino acid:cation symporter activity,MF,hypergeometric,exon
GO:0006620,0.308756592057273,0.95001270703269,1,14,posttranslational protein targeting to endoplasmic reticulum membrane,BP,hypergeometric,exon
GO:0006999,0.308756592057273,0.95001270703269,1,14,nuclear pore organization,BP,hypergeometric,exon
GO:0014041,0.308756592057273,0.95001270703269,1,14,regulation of neuron maturation,BP,hypergeometric,exon
GO:0015865,0.308756592057273,0.95001270703269,1,14,purine nucleotide transport,BP,hypergeometric,exon
GO:0016074,0.308756592057273,0.95001270703269,1,14,sno(s)RNA metabolic process,BP,hypergeometric,exon
GO:0022829,0.308756592057273,0.95001270703269,1,14,wide pore channel activity,MF,hypergeometric,exon
GO:0031281,0.308756592057273,0.95001270703269,1,14,positive regulation of cyclase activity,BP,hypergeometric,exon
GO:0031290,0.308756592057273,0.95001270703269,1,14,retinal ganglion cell axon guidance,BP,hypergeometric,exon
GO:0031527,0.308756592057273,0.95001270703269,1,14,filopodium membrane,CC,hypergeometric,exon
GO:0033130,0.308756592057273,0.95001270703269,1,14,acetylcholine receptor binding,MF,hypergeometric,exon
GO:0033235,0.308756592057273,0.95001270703269,1,14,positive regulation of protein sumoylation,BP,hypergeometric,exon
GO:0034755,0.308756592057273,0.95001270703269,1,14,iron ion transmembrane transport,BP,hypergeometric,exon
GO:0035102,0.308756592057273,0.95001270703269,1,14,PRC1 complex,CC,hypergeometric,exon
GO:0035721,0.308756592057273,0.95001270703269,1,14,intraciliary retrograde transport,BP,hypergeometric,exon
GO:0042249,0.308756592057273,0.95001270703269,1,14,establishment of planar polarity of embryonic epithelium,BP,hypergeometric,exon
GO:0042402,0.308756592057273,0.95001270703269,1,14,cellular biogenic amine catabolic process,BP,hypergeometric,exon
GO:0042754,0.308756592057273,0.95001270703269,1,14,negative regulation of circadian rhythm,BP,hypergeometric,exon
GO:0043176,0.308756592057273,0.95001270703269,1,14,amine binding,MF,hypergeometric,exon
GO:0043981,0.308756592057273,0.95001270703269,1,14,histone H4-K5 acetylation,BP,hypergeometric,exon
GO:0043982,0.308756592057273,0.95001270703269,1,14,histone H4-K8 acetylation,BP,hypergeometric,exon
GO:0045843,0.308756592057273,0.95001270703269,1,14,negative regulation of striated muscle tissue development,BP,hypergeometric,exon
GO:0046716,0.308756592057273,0.95001270703269,1,14,muscle cell cellular homeostasis,BP,hypergeometric,exon
GO:0048535,0.308756592057273,0.95001270703269,1,14,lymph node development,BP,hypergeometric,exon
GO:0051011,0.308756592057273,0.95001270703269,1,14,microtubule minus-end binding,MF,hypergeometric,exon
GO:0051290,0.308756592057273,0.95001270703269,1,14,protein heterotetramerization,BP,hypergeometric,exon
GO:0051349,0.308756592057273,0.95001270703269,1,14,positive regulation of lyase activity,BP,hypergeometric,exon
GO:0051503,0.308756592057273,0.95001270703269,1,14,adenine nucleotide transport,BP,hypergeometric,exon
GO:0055003,0.308756592057273,0.95001270703269,1,14,cardiac myofibril assembly,BP,hypergeometric,exon
GO:0060307,0.308756592057273,0.95001270703269,1,14,regulation of ventricular cardiac muscle cell membrane repolarization,BP,hypergeometric,exon
GO:0060546,0.308756592057273,0.95001270703269,1,14,negative regulation of necroptotic process,BP,hypergeometric,exon
GO:0070593,0.308756592057273,0.95001270703269,1,14,dendrite self-avoidance,BP,hypergeometric,exon
GO:0070679,0.308756592057273,0.95001270703269,1,14,"inositol 1,4,5 trisphosphate binding",MF,hypergeometric,exon
GO:0071243,0.308756592057273,0.95001270703269,1,14,cellular response to arsenic-containing substance,BP,hypergeometric,exon
GO:1900037,0.308756592057273,0.95001270703269,1,14,regulation of cellular response to hypoxia,BP,hypergeometric,exon
GO:1900153,0.308756592057273,0.95001270703269,1,14,"positive regulation of nuclear-transcribed mRNA catabolic process, deadenylation-dependent decay",BP,hypergeometric,exon
GO:1901550,0.308756592057273,0.95001270703269,1,14,regulation of endothelial cell development,BP,hypergeometric,exon
GO:1901739,0.308756592057273,0.95001270703269,1,14,regulation of myoblast fusion,BP,hypergeometric,exon
GO:1901836,0.308756592057273,0.95001270703269,1,14,regulation of transcription of nucleolar large rRNA by RNA polymerase I,BP,hypergeometric,exon
GO:1903140,0.308756592057273,0.95001270703269,1,14,regulation of establishment of endothelial barrier,BP,hypergeometric,exon
GO:1904321,0.308756592057273,0.95001270703269,1,14,response to forskolin,BP,hypergeometric,exon
GO:1904322,0.308756592057273,0.95001270703269,1,14,cellular response to forskolin,BP,hypergeometric,exon
GO:2001267,0.308756592057273,0.95001270703269,1,14,regulation of cysteine-type endopeptidase activity involved in apoptotic signaling pathway,BP,hypergeometric,exon
GO:0034655,0.30877799327616,0.797879524854536,10,316,nucleobase-containing compound catabolic process,BP,hypergeometric,exon
GO:0044057,0.309031959776678,0.782758058829482,14,459,regulation of system process,BP,hypergeometric,exon
GO:0006323,0.309539760077979,0.849314603098276,4,108,DNA packaging,BP,hypergeometric,exon
GO:0007266,0.309539760077979,0.849314603098276,4,108,Rho protein signal transduction,BP,hypergeometric,exon
GO:0050792,0.309539760077979,0.849314603098276,4,108,regulation of viral process,BP,hypergeometric,exon
GO:0051224,0.309539760077979,0.849314603098276,4,108,negative regulation of protein transport,BP,hypergeometric,exon
GO:0071333,0.309539760077979,0.849314603098276,4,108,cellular response to glucose stimulus,BP,hypergeometric,exon
GO:0120162,0.30993569620525,0.86874046305912,3,75,positive regulation of cold-induced thermogenesis,BP,hypergeometric,exon
GO:2000300,0.30993569620525,0.86874046305912,3,75,regulation of synaptic vesicle exocytosis,BP,hypergeometric,exon
GO:0005938,0.3108057244664,0.80737228451439,8,246,cell cortex,CC,hypergeometric,exon
GO:0061630,0.3108057244664,0.80737228451439,8,246,ubiquitin protein ligase activity,MF,hypergeometric,exon
GO:0048522,0.311855136911806,0.727521915552598,114,4201,positive regulation of cellular process,BP,hypergeometric,exon
GO:0008092,0.312367653652506,0.760149777375369,24,824,cytoskeletal protein binding,MF,hypergeometric,exon
GO:0043412,0.315022994801152,0.729663855543057,78,2841,macromolecule modification,BP,hypergeometric,exon
GO:0071331,0.315434412027329,0.845194853592455,4,109,cellular response to hexose stimulus,BP,hypergeometric,exon
GO:0031056,0.315752073762922,0.830526120555044,5,143,regulation of histone modification,BP,hypergeometric,exon
GO:0010522,0.317088046040262,0.864104816446702,3,76,regulation of calcium ion transport into cytosol,BP,hypergeometric,exon
GO:0030672,0.317088046040262,0.864104816446702,3,76,synaptic vesicle membrane,CC,hypergeometric,exon
GO:0031397,0.317088046040262,0.864104816446702,3,76,negative regulation of protein ubiquitination,BP,hypergeometric,exon
GO:0055013,0.317088046040262,0.864104816446702,3,76,cardiac muscle cell development,BP,hypergeometric,exon
GO:0070252,0.317088046040262,0.864104816446702,3,76,actin-mediated cell contraction,BP,hypergeometric,exon
GO:0099501,0.317088046040262,0.864104816446702,3,76,exocytic vesicle membrane,CC,hypergeometric,exon
GO:0016328,0.318102264066386,0.893890632205224,2,44,lateral plasma membrane,CC,hypergeometric,exon
GO:0034205,0.318102264066386,0.893890632205224,2,44,amyloid-beta formation,BP,hypergeometric,exon
GO:0034605,0.318102264066386,0.893890632205224,2,44,cellular response to heat,BP,hypergeometric,exon
GO:0035088,0.318102264066386,0.893890632205224,2,44,establishment or maintenance of apical/basal cell polarity,BP,hypergeometric,exon
GO:0061245,0.318102264066386,0.893890632205224,2,44,establishment or maintenance of bipolar cell polarity,BP,hypergeometric,exon
GO:1902099,0.318102264066386,0.893890632205224,2,44,regulation of metaphase/anaphase transition of cell cycle,BP,hypergeometric,exon
GO:1903533,0.318102264066386,0.893890632205224,2,44,regulation of protein targeting,BP,hypergeometric,exon
GO:0005925,0.320877453758172,0.826733490105029,5,144,focal adhesion,CC,hypergeometric,exon
GO:0071326,0.321338683269772,0.8410287758974,4,110,cellular response to monosaccharide stimulus,BP,hypergeometric,exon
GO:0099081,0.322342357458544,0.757551397385393,20,682,supramolecular polymer,CC,hypergeometric,exon
GO:0015833,0.323214334618951,0.804808857788495,7,214,peptide transport,BP,hypergeometric,exon
GO:0032432,0.324243110354581,0.859403540379608,3,77,actin filament bundle,CC,hypergeometric,exon
GO:0018205,0.325783265367656,0.783911292024008,10,321,peptidyl-lysine modification,BP,hypergeometric,exon
GO:0070507,0.326012578200741,0.822906030633754,5,145,regulation of microtubule cytoskeleton organization,BP,hypergeometric,exon
GO:0000729,0.326760021956853,0.943291426536847,1,15,DNA double-strand break processing,BP,hypergeometric,exon
GO:0001502,0.326760021956853,0.943291426536847,1,15,cartilage condensation,BP,hypergeometric,exon
GO:0004697,0.326760021956853,0.943291426536847,1,15,protein kinase C activity,MF,hypergeometric,exon
GO:0005172,0.326760021956853,0.943291426536847,1,15,vascular endothelial growth factor receptor binding,MF,hypergeometric,exon
GO:0008307,0.326760021956853,0.943291426536847,1,15,structural constituent of muscle,MF,hypergeometric,exon
GO:0009301,0.326760021956853,0.943291426536847,1,15,snRNA transcription,BP,hypergeometric,exon
GO:0009310,0.326760021956853,0.943291426536847,1,15,amine catabolic process,BP,hypergeometric,exon
GO:0010369,0.326760021956853,0.943291426536847,1,15,chromocenter,CC,hypergeometric,exon
GO:0015216,0.326760021956853,0.943291426536847,1,15,purine nucleotide transmembrane transporter activity,MF,hypergeometric,exon
GO:0016322,0.326760021956853,0.943291426536847,1,15,neuron remodeling,BP,hypergeometric,exon
GO:0021542,0.326760021956853,0.943291426536847,1,15,dentate gyrus development,BP,hypergeometric,exon
GO:0021681,0.326760021956853,0.943291426536847,1,15,cerebellar granular layer development,BP,hypergeometric,exon
GO:0030548,0.326760021956853,0.943291426536847,1,15,acetylcholine receptor regulator activity,MF,hypergeometric,exon
GO:0030852,0.326760021956853,0.943291426536847,1,15,regulation of granulocyte differentiation,BP,hypergeometric,exon
GO:0032239,0.326760021956853,0.943291426536847,1,15,regulation of nucleobase-containing compound transport,BP,hypergeometric,exon
GO:0032570,0.326760021956853,0.943291426536847,1,15,response to progesterone,BP,hypergeometric,exon
GO:0042588,0.326760021956853,0.943291426536847,1,15,zymogen granule,CC,hypergeometric,exon
GO:0045061,0.326760021956853,0.943291426536847,1,15,thymic T cell selection,BP,hypergeometric,exon
GO:0045198,0.326760021956853,0.943291426536847,1,15,establishment of epithelial cell apical/basal polarity,BP,hypergeometric,exon
GO:0045652,0.326760021956853,0.943291426536847,1,15,regulation of megakaryocyte differentiation,BP,hypergeometric,exon
GO:0048532,0.326760021956853,0.943291426536847,1,15,anatomical structure arrangement,BP,hypergeometric,exon
GO:0048635,0.326760021956853,0.943291426536847,1,15,negative regulation of muscle organ development,BP,hypergeometric,exon
GO:0051386,0.326760021956853,0.943291426536847,1,15,regulation of neurotrophin TRK receptor signaling pathway,BP,hypergeometric,exon
GO:0055119,0.326760021956853,0.943291426536847,1,15,relaxation of cardiac muscle,BP,hypergeometric,exon
GO:0060055,0.326760021956853,0.943291426536847,1,15,angiogenesis involved in wound healing,BP,hypergeometric,exon
GO:0060211,0.326760021956853,0.943291426536847,1,15,regulation of nuclear-transcribed mRNA poly(A) tail shortening,BP,hypergeometric,exon
GO:0060706,0.326760021956853,0.943291426536847,1,15,cell differentiation involved in embryonic placenta development,BP,hypergeometric,exon
GO:0062099,0.326760021956853,0.943291426536847,1,15,negative regulation of programmed necrotic cell death,BP,hypergeometric,exon
GO:0070102,0.326760021956853,0.943291426536847,1,15,interleukin-6-mediated signaling pathway,BP,hypergeometric,exon
GO:0070403,0.326760021956853,0.943291426536847,1,15,NAD+ binding,MF,hypergeometric,exon
GO:0086012,0.326760021956853,0.943291426536847,1,15,membrane depolarization during cardiac muscle cell action potential,BP,hypergeometric,exon
GO:0097284,0.326760021956853,0.943291426536847,1,15,hepatocyte apoptotic process,BP,hypergeometric,exon
GO:0098743,0.326760021956853,0.943291426536847,1,15,cell aggregation,BP,hypergeometric,exon
GO:0099602,0.326760021956853,0.943291426536847,1,15,neurotransmitter receptor regulator activity,MF,hypergeometric,exon
GO:0099625,0.326760021956853,0.943291426536847,1,15,ventricular cardiac muscle cell membrane repolarization,BP,hypergeometric,exon
GO:1900221,0.326760021956853,0.943291426536847,1,15,regulation of amyloid-beta clearance,BP,hypergeometric,exon
GO:1900452,0.326760021956853,0.943291426536847,1,15,regulation of long-term synaptic depression,BP,hypergeometric,exon
GO:1902187,0.326760021956853,0.943291426536847,1,15,negative regulation of viral release from host cell,BP,hypergeometric,exon
GO:1904814,0.326760021956853,0.943291426536847,1,15,"regulation of protein localization to chromosome, telomeric region",BP,hypergeometric,exon
GO:1904923,0.326760021956853,0.943291426536847,1,15,regulation of autophagy of mitochondrion in response to mitochondrial depolarization,BP,hypergeometric,exon
GO:1990825,0.326760021956853,0.943291426536847,1,15,sequence-specific mRNA binding,MF,hypergeometric,exon
GO:2000047,0.326760021956853,0.943291426536847,1,15,regulation of cell-cell adhesion mediated by cadherin,BP,hypergeometric,exon
GO:2000651,0.326760021956853,0.943291426536847,1,15,positive regulation of sodium ion transmembrane transporter activity,BP,hypergeometric,exon
GO:0030336,0.327411148796939,0.801491000955533,7,215,negative regulation of cell migration,BP,hypergeometric,exon
GO:0001664,0.327555030657373,0.810406209979097,6,180,G protein-coupled receptor binding,MF,hypergeometric,exon
GO:0045944,0.327623975161895,0.745259621117005,25,868,positive regulation of transcription by RNA polymerase II,BP,hypergeometric,exon
GO:0001825,0.327706446200826,0.888387651824089,2,45,blastocyst formation,BP,hypergeometric,exon
GO:0003743,0.327706446200826,0.888387651824089,2,45,translation initiation factor activity,MF,hypergeometric,exon
GO:0006949,0.327706446200826,0.888387651824089,2,45,syncytium formation,BP,hypergeometric,exon
GO:0015179,0.327706446200826,0.888387651824089,2,45,L-amino acid transmembrane transporter activity,MF,hypergeometric,exon
GO:0030239,0.327706446200826,0.888387651824089,2,45,myofibril assembly,BP,hypergeometric,exon
GO:0030331,0.327706446200826,0.888387651824089,2,45,estrogen receptor binding,MF,hypergeometric,exon
GO:0032008,0.327706446200826,0.888387651824089,2,45,positive regulation of TOR signaling,BP,hypergeometric,exon
GO:0035196,0.327706446200826,0.888387651824089,2,45,production of miRNAs involved in gene silencing by miRNA,BP,hypergeometric,exon
GO:0055002,0.327706446200826,0.888387651824089,2,45,striated muscle cell development,BP,hypergeometric,exon
GO:0060147,0.327706446200826,0.888387651824089,2,45,regulation of posttranscriptional gene silencing,BP,hypergeometric,exon
GO:0051052,0.329208057448445,0.781070247552968,10,322,regulation of DNA metabolic process,BP,hypergeometric,exon
GO:0042641,0.331398365089773,0.854638258025228,3,78,actomyosin,CC,hypergeometric,exon
GO:0016462,0.331670077074658,0.763450814555415,14,467,pyrophosphatase activity,MF,hypergeometric,exon
GO:0098590,0.332007348309484,0.740065116569147,26,907,plasma membrane region,CC,hypergeometric,exon
GO:0009615,0.332162504412883,0.806829620545003,6,181,response to virus,BP,hypergeometric,exon
GO:0004714,0.337273912489625,0.882777812152745,2,46,transmembrane receptor protein tyrosine kinase activity,MF,hypergeometric,exon
GO:0007091,0.337273912489625,0.882777812152745,2,46,metaphase/anaphase transition of mitotic cell cycle,BP,hypergeometric,exon
GO:0010259,0.337273912489625,0.882777812152745,2,46,multicellular organism aging,BP,hypergeometric,exon
GO:0016765,0.337273912489625,0.882777812152745,2,46,"transferase activity, transferring alkyl or aryl (other than methyl) groups",MF,hypergeometric,exon
GO:0032481,0.337273912489625,0.882777812152745,2,46,positive regulation of type I interferon production,BP,hypergeometric,exon
GO:0048260,0.337273912489625,0.882777812152745,2,46,positive regulation of receptor-mediated endocytosis,BP,hypergeometric,exon
GO:0060966,0.337273912489625,0.882777812152745,2,46,regulation of gene silencing by RNA,BP,hypergeometric,exon
GO:0120192,0.337273912489625,0.882777812152745,2,46,tight junction assembly,BP,hypergeometric,exon
GO:0048468,0.338358211432781,0.716500232233113,50,1805,cell development,BP,hypergeometric,exon
GO:0030684,0.338551351196324,0.849810616276183,3,79,preribosome,CC,hypergeometric,exon
GO:1904950,0.339094153449852,0.828262103118827,4,113,negative regulation of establishment of protein localization,BP,hypergeometric,exon
GO:0015629,0.342143527867842,0.761373477097973,12,398,actin cytoskeleton,CC,hypergeometric,exon
GO:0001891,0.344295797112412,0.936276605376542,1,16,phagocytic cup,CC,hypergeometric,exon
GO:0002360,0.344295797112412,0.936276605376542,1,16,T cell lineage commitment,BP,hypergeometric,exon
GO:0003338,0.344295797112412,0.936276605376542,1,16,metanephros morphogenesis,BP,hypergeometric,exon
GO:0004190,0.344295797112412,0.936276605376542,1,16,aspartic-type endopeptidase activity,MF,hypergeometric,exon
GO:0005104,0.344295797112412,0.936276605376542,1,16,fibroblast growth factor receptor binding,MF,hypergeometric,exon
GO:0006359,0.344295797112412,0.936276605376542,1,16,regulation of transcription by RNA polymerase III,BP,hypergeometric,exon
GO:0006910,0.344295797112412,0.936276605376542,1,16,"phagocytosis, recognition",BP,hypergeometric,exon
GO:0007063,0.344295797112412,0.936276605376542,1,16,regulation of sister chromatid cohesion,BP,hypergeometric,exon
GO:0007252,0.344295797112412,0.936276605376542,1,16,I-kappaB phosphorylation,BP,hypergeometric,exon
GO:0010663,0.344295797112412,0.936276605376542,1,16,positive regulation of striated muscle cell apoptotic process,BP,hypergeometric,exon
GO:0010666,0.344295797112412,0.936276605376542,1,16,positive regulation of cardiac muscle cell apoptotic process,BP,hypergeometric,exon
GO:0010738,0.344295797112412,0.936276605376542,1,16,regulation of protein kinase A signaling,BP,hypergeometric,exon
GO:0015144,0.344295797112412,0.936276605376542,1,16,carbohydrate transmembrane transporter activity,MF,hypergeometric,exon
GO:0015301,0.344295797112412,0.936276605376542,1,16,anion:anion antiporter activity,MF,hypergeometric,exon
GO:0016327,0.344295797112412,0.936276605376542,1,16,apicolateral plasma membrane,CC,hypergeometric,exon
GO:0016486,0.344295797112412,0.936276605376542,1,16,peptide hormone processing,BP,hypergeometric,exon
GO:0016540,0.344295797112412,0.936276605376542,1,16,protein autoprocessing,BP,hypergeometric,exon
[truncated: 82,966 more rows]

## Sheet: README
Table S1. GOseq results for nucleus-enriched genes in the comparison of L5 IT neurons (fold change > 1.5). The quantification (Exon, Intron&Exon, Length-corrected) and statistical method (uncorrected Hypergeoemtric or GOseq) are stored in columns ‘mode’ and ‘quant’.
