# Supplementary material for: Differences in molecular sampling and data processing explain variation among single-cell and single-nucleus RNA-seq experiments
Source: HighWire-hosted journal article supplement (doi:10.1101/gr.278253.123), 2024-02-01
Supplement: Supplemental_Table_S2.xlsx [file Supplemental_Table_S2.xlsx]

## Sheet: Supplemental_Table_S2
category,over_represented_pvalue,under_represented_pvalue,numDEInCat,numInCat,term,ontology,subclass,tech,mode
GO:0044281,9.87994736740109e-17,1,110,929,small molecule metabolic process,BP,Astro,cells,goseq
GO:0006629,3.75069506832666e-13,1,91,721,lipid metabolic process,BP,Astro,cells,goseq
GO:0008610,3.93528973495276e-12,1,59,394,lipid biosynthetic process,BP,Astro,cells,goseq
GO:0006082,3.11725589524877e-11,1,60,473,organic acid metabolic process,BP,Astro,cells,goseq
GO:0019752,4.31147716929727e-11,1,58,460,carboxylic acid metabolic process,BP,Astro,cells,goseq
GO:0051239,6.32612065633731e-11,1,163,1483,regulation of multicellular organismal process,BP,Astro,cells,goseq
GO:0043436,7.62267248995278e-11,1,58,465,oxoacid metabolic process,BP,Astro,cells,goseq
GO:0044255,9.16802103907634e-10,1,66,548,cellular lipid metabolic process,BP,Astro,cells,goseq
GO:0046890,1.00717101281969e-09,0.999999999820438,25,106,regulation of lipid biosynthetic process,BP,Astro,cells,goseq
GO:0032787,1.02932026767828e-09,1,42,294,monocarboxylic acid metabolic process,BP,Astro,cells,goseq
GO:0044283,1.53833880829026e-09,1,40,289,small molecule biosynthetic process,BP,Astro,cells,goseq
GO:0046889,3.84595310275872e-09,0.999999999508203,18,57,positive regulation of lipid biosynthetic process,BP,Astro,cells,goseq
GO:0019216,5.14777357941052e-09,1,37,213,regulation of lipid metabolic process,BP,Astro,cells,goseq
GO:0045834,8.61688656090954e-09,0.999999998392702,23,93,positive regulation of lipid metabolic process,BP,Astro,cells,goseq
GO:0042127,8.71345164976849e-09,1,99,870,regulation of cell population proliferation,BP,Astro,cells,goseq
GO:0046394,1.7919777356943e-08,0.999999996089468,25,135,carboxylic acid biosynthetic process,BP,Astro,cells,goseq
GO:0006091,1.86707074324181e-08,0.999999995577043,37,292,generation of precursor metabolites and energy,BP,Astro,cells,goseq
GO:0050793,1.90751261381748e-08,1,156,1498,regulation of developmental process,BP,Astro,cells,goseq
GO:0016053,1.98170586596494e-08,0.999999995649042,25,136,organic acid biosynthetic process,BP,Astro,cells,goseq
GO:0010001,2.45338055162123e-08,0.999999993392315,32,163,glial cell differentiation,BP,Astro,cells,goseq
GO:0072330,2.55030949824106e-08,0.999999995277153,21,96,monocarboxylic acid biosynthetic process,BP,Astro,cells,goseq
GO:0015980,2.73313755575114e-08,0.999999993072178,30,219,energy derivation by oxidation of organic compounds,BP,Astro,cells,goseq
GO:0048522,3.09860306622481e-08,1,280,3420,positive regulation of cellular process,BP,Astro,cells,goseq
GO:0007155,3.24730100563126e-08,1,100,687,cell adhesion,BP,Astro,cells,goseq
GO:0048518,3.33169075454687e-08,1,293,3632,positive regulation of biological process,BP,Astro,cells,goseq
GO:0022610,3.52480414574838e-08,1,100,689,biological adhesion,BP,Astro,cells,goseq
GO:0009891,5.18521530566575e-08,1,114,1175,positive regulation of biosynthetic process,BP,Astro,cells,goseq
GO:0050896,5.20541023402056e-08,1,339,4269,response to stimulus,BP,Astro,cells,goseq
GO:0008284,6.07821207360749e-08,1,62,477,positive regulation of cell population proliferation,BP,Astro,cells,goseq
GO:1902652,6.08037333109717e-08,0.99999998983998,18,84,secondary alcohol metabolic process,BP,Astro,cells,goseq
GO:0048708,7.88765838558945e-08,0.999999989891168,15,47,astrocyte differentiation,BP,Astro,cells,goseq
GO:0006631,8.29054676029189e-08,0.999999977470487,29,195,fatty acid metabolic process,BP,Astro,cells,goseq
GO:0008283,8.41105150379906e-08,1,110,1055,cell population proliferation,BP,Astro,cells,goseq
GO:0019637,9.41636774868383e-08,1,61,555,organophosphate metabolic process,BP,Astro,cells,goseq
GO:0008202,1.57242626808811e-07,0.999999961202277,25,140,steroid metabolic process,BP,Astro,cells,goseq
GO:0072282,1.58369504801745e-07,1,5,5,metanephric nephron tubule morphogenesis,BP,Astro,cells,goseq
GO:0031328,1.61542658077231e-07,1,110,1151,positive regulation of cellular biosynthetic process,BP,Astro,cells,goseq
GO:0045596,1.96156539012879e-07,1,54,398,negative regulation of cell differentiation,BP,Astro,cells,goseq
GO:0051093,2.29476954980077e-07,1,69,546,negative regulation of developmental process,BP,Astro,cells,goseq
GO:0051240,2.34898131517482e-07,1,94,808,positive regulation of multicellular organismal process,BP,Astro,cells,goseq
GO:0035239,2.4282852414807e-07,1,66,482,tube morphogenesis,BP,Astro,cells,goseq
GO:0045595,3.69494124573059e-07,1,102,944,regulation of cell differentiation,BP,Astro,cells,goseq
GO:0046470,3.83208559175849e-07,0.999999963318358,11,33,phosphatidylcholine metabolic process,BP,Astro,cells,goseq
GO:0006633,3.86214042306622e-07,0.999999930785341,17,78,fatty acid biosynthetic process,BP,Astro,cells,goseq
GO:0042221,5.51522566235552e-07,1,181,2063,response to chemical,BP,Astro,cells,goseq
GO:0009653,5.56771434389225e-07,1,172,1649,anatomical structure morphogenesis,BP,Astro,cells,goseq
GO:0008203,6.74921700007364e-07,0.999999880838986,16,77,cholesterol metabolic process,BP,Astro,cells,goseq
GO:0015453,7.08603371538358e-07,0.999999932496289,10,42,oxidoreduction-driven active transmembrane transporter activity,MF,Astro,cells,goseq
GO:0072173,7.17715307302057e-07,0.999999994875928,5,6,metanephric tubule morphogenesis,BP,Astro,cells,goseq
GO:0042063,0.00000118384250431897,0.999999590404298,35,219,gliogenesis,BP,Astro,cells,goseq
GO:0009719,0.00000123476744174559,0.999999563922077,91,831,response to endogenous stimulus,BP,Astro,cells,goseq
GO:0016125,0.00000125001385829053,0.999999766547785,16,82,sterol metabolic process,BP,Astro,cells,goseq
GO:0048731,0.00000145885074146867,0.999999413761112,250,2779,system development,BP,Astro,cells,goseq
GO:0001503,0.00000163462472050619,0.999999433464487,34,208,ossification,BP,Astro,cells,goseq
GO:0072234,0.00000167564627976795,0.999999960191508,6,9,metanephric nephron tubule development,BP,Astro,cells,goseq
GO:0030155,0.00000203784278777454,0.99999917945041,57,387,regulation of cell adhesion,BP,Astro,cells,goseq
GO:0098609,0.00000204209107653065,0.999999339597232,61,398,cell-cell adhesion,BP,Astro,cells,goseq
GO:0009725,0.00000241920656456915,0.999999045018788,52,414,response to hormone,BP,Astro,cells,goseq
GO:0062012,0.00000258334379581786,0.999999126632021,31,212,regulation of small molecule metabolic process,BP,Astro,cells,goseq
GO:2000026,0.0000026743597593948,0.999998767610654,90,792,regulation of multicellular organismal development,BP,Astro,cells,goseq
GO:0031325,0.00000280955393275234,0.999998563989749,164,1960,positive regulation of cellular metabolic process,BP,Astro,cells,goseq
GO:0010033,0.00000285297112151895,0.999998570798549,141,1574,response to organic substance,BP,Astro,cells,goseq
GO:0040011,0.00000290086540072005,0.999998590574165,118,1029,locomotion,BP,Astro,cells,goseq
GO:0045944,0.0000029815829761166,0.999998664834192,78,730,positive regulation of transcription by RNA polymerase II,BP,Astro,cells,goseq
GO:0072243,0.00000312050926308952,0.999999905547221,6,10,metanephric nephron epithelium development,BP,Astro,cells,goseq
GO:0050673,0.0000032668185680095,0.999998807474256,35,223,epithelial cell proliferation,BP,Astro,cells,goseq
GO:0045445,0.00000363912811476857,0.999999396583365,14,46,myoblast differentiation,BP,Astro,cells,goseq
GO:1901615,0.00000424770699419015,0.999998413757485,35,269,organic hydroxy compound metabolic process,BP,Astro,cells,goseq
GO:0015988,0.00000430361965538737,0.999999973066952,4,5,"energy coupled proton transmembrane transport, against electrochemical gradient",BP,Astro,cells,goseq
GO:0015990,0.00000430361965538737,0.999999973066952,4,5,electron transport coupled proton transport,BP,Astro,cells,goseq
GO:0009893,0.00000449091865124833,0.999997418826376,179,2183,positive regulation of metabolic process,BP,Astro,cells,goseq
GO:0062013,0.00000488457980170925,0.999998875760731,18,86,positive regulation of small molecule metabolic process,BP,Astro,cells,goseq
GO:0001501,0.00000494033000525748,0.999998024811674,40,271,skeletal system development,BP,Astro,cells,goseq
GO:0007417,0.00000509162748506637,0.99999750325003,77,604,central nervous system development,BP,Astro,cells,goseq
GO:0001659,0.0000052358461755722,0.999998668279096,20,102,temperature homeostasis,BP,Astro,cells,goseq
GO:0009055,0.0000053923170405575,0.999999334869597,10,50,electron transfer activity,MF,Astro,cells,goseq
GO:0010647,0.00000551095146157837,0.999997087033199,104,1000,positive regulation of cell communication,BP,Astro,cells,goseq
GO:0120161,0.00000552476971027261,0.999998719973122,18,84,regulation of cold-induced thermogenesis,BP,Astro,cells,goseq
GO:0016477,0.00000558185804191,0.999997073553873,101,852,cell migration,BP,Astro,cells,goseq
GO:0023056,0.00000571030347314791,0.999996979251328,104,1002,positive regulation of signaling,BP,Astro,cells,goseq
GO:0048513,0.00000598553918813567,0.999996389226472,174,1850,animal organ development,BP,Astro,cells,goseq
GO:0032587,0.00000605597447736584,0.99999884324212,15,56,ruffle membrane,CC,Astro,cells,goseq
GO:0016215,0.00000610382587163819,0.999999958192243,4,5,acyl-CoA desaturase activity,MF,Astro,cells,goseq
GO:0050678,0.00000623212544464499,0.999997806431904,31,189,regulation of epithelial cell proliferation,BP,Astro,cells,goseq
GO:0042773,0.0000063413921377593,0.999999088110278,11,61,ATP synthesis coupled electron transport,BP,Astro,cells,goseq
GO:0022904,0.00000706093798998866,0.999998750704952,13,75,respiratory electron transport chain,BP,Astro,cells,goseq
GO:0106106,0.00000746799608795483,0.999998227027507,18,85,cold-induced thermogenesis,BP,Astro,cells,goseq
GO:0007154,0.00000778282367525259,0.999995086683476,268,3169,cell communication,BP,Astro,cells,goseq
GO:0048584,0.00000821108128979215,0.99999539357708,108,1085,positive regulation of response to stimulus,BP,Astro,cells,goseq
GO:0045685,0.00000862239525926498,0.999998395636864,14,56,regulation of glial cell differentiation,BP,Astro,cells,goseq
GO:0006639,0.00000967906075381243,0.999997882560224,16,76,acylglycerol metabolic process,BP,Astro,cells,goseq
GO:0005576,0.0000106220497097576,0.999994541841746,73,678,extracellular region,CC,Astro,cells,goseq
GO:0042592,0.0000115539445408368,0.999993567028408,100,1024,homeostatic process,BP,Astro,cells,goseq
GO:0030334,0.0000121244709859081,0.999993852307786,70,533,regulation of cell migration,BP,Astro,cells,goseq
GO:0048870,0.000012588149077952,0.999992770934545,105,925,cell motility,BP,Astro,cells,goseq
GO:0051674,0.000012588149077952,0.999992770934545,105,925,localization of cell,BP,Astro,cells,goseq
GO:0006638,0.0000126913268928867,0.999997155371086,16,77,neutral lipid metabolic process,BP,Astro,cells,goseq
GO:0021782,0.0000128209651560487,0.999997137358211,16,74,glial cell development,BP,Astro,cells,goseq
GO:0072170,0.0000128990748358906,0.9999994489022,6,11,metanephric tubule development,BP,Astro,cells,goseq
GO:0051173,0.000013290562902274,0.999991784382498,153,1842,positive regulation of nitrogen compound metabolic process,BP,Astro,cells,goseq
GO:0007155,5.42866805995625e-18,1,100,687,cell adhesion,BP,Astro,cells,hypergeometric
GO:0022610,6.67553085634462e-18,1,100,689,biological adhesion,BP,Astro,cells,hypergeometric
GO:0051239,1.14844057931473e-16,1,163,1483,regulation of multicellular organismal process,BP,Astro,cells,hypergeometric
GO:0009653,2.09368035473511e-15,1,172,1649,anatomical structure morphogenesis,BP,Astro,cells,hypergeometric
GO:0048731,6.23722019012975e-15,0.999999999999997,250,2779,system development,BP,Astro,cells,hypergeometric
GO:0071944,2.15041070289981e-14,0.999999999999989,243,2702,cell periphery,CC,Astro,cells,hypergeometric
GO:0005886,2.47184914799138e-14,0.999999999999988,230,2513,plasma membrane,CC,Astro,cells,hypergeometric
GO:0050793,8.24974265083833e-14,0.999999999999962,156,1498,regulation of developmental process,BP,Astro,cells,hypergeometric
GO:0032502,2.44041789766087e-13,0.999999999999868,298,3605,developmental process,BP,Astro,cells,hypergeometric
GO:0050896,2.77112929779494e-13,0.999999999999849,339,4269,response to stimulus,BP,Astro,cells,hypergeometric
GO:0044281,3.02622656815603e-13,0.999999999999875,110,929,small molecule metabolic process,BP,Astro,cells,hypergeometric
GO:0040011,3.28866722440544e-13,0.99999999999986,118,1029,locomotion,BP,Astro,cells,hypergeometric
GO:0048856,5.89805535536397e-13,0.99999999999968,280,3345,anatomical structure development,BP,Astro,cells,hypergeometric
GO:0007154,8.79859310561156e-13,0.999999999999524,268,3169,cell communication,BP,Astro,cells,hypergeometric
GO:0006629,1.33099779754404e-12,0.999999999999484,91,721,lipid metabolic process,BP,Astro,cells,hypergeometric
GO:0032501,1.70849880358052e-12,0.999999999999053,311,3864,multicellular organismal process,BP,Astro,cells,hypergeometric
GO:0098609,3.19758301496772e-12,0.999999999998993,61,398,cell-cell adhesion,BP,Astro,cells,hypergeometric
GO:0016477,3.20219799562781e-12,0.999999999998673,101,852,cell migration,BP,Astro,cells,hypergeometric
GO:0023052,4.55851473955649e-12,0.99999999999749,263,3134,signaling,BP,Astro,cells,hypergeometric
GO:0007399,4.61795068752892e-12,0.999999999997716,161,1640,nervous system development,BP,Astro,cells,hypergeometric
GO:0007275,5.28710725547638e-12,0.999999999997086,261,3107,multicellular organism development,BP,Astro,cells,hypergeometric
GO:0048522,1.00868438880425e-11,0.999999999994346,280,3420,positive regulation of cellular process,BP,Astro,cells,hypergeometric
GO:0048518,1.27724338934377e-11,0.999999999992786,293,3632,positive regulation of biological process,BP,Astro,cells,hypergeometric
GO:0048870,1.64203455349066e-11,0.999999999992855,105,925,cell motility,BP,Astro,cells,hypergeometric
GO:0051674,1.64203455349066e-11,0.999999999992855,105,925,localization of cell,BP,Astro,cells,hypergeometric
GO:0048513,1.87028410126378e-11,0.999999999990348,174,1850,animal organ development,BP,Astro,cells,hypergeometric
GO:0008610,1.98660353418865e-11,0.999999999993558,59,394,lipid biosynthetic process,BP,Astro,cells,hypergeometric
GO:0006928,2.97763551837619e-11,0.999999999985923,127,1217,movement of cell or subcellular component,BP,Astro,cells,hypergeometric
GO:0007417,5.45152455667176e-11,0.999999999978867,77,604,central nervous system development,BP,Astro,cells,hypergeometric
GO:0051240,5.94930224516407e-11,0.99999999997463,94,808,positive regulation of multicellular organismal process,BP,Astro,cells,hypergeometric
GO:0042127,6.06086191673922e-11,0.99999999997357,99,870,regulation of cell population proliferation,BP,Astro,cells,hypergeometric
GO:0035239,6.83867893418895e-11,0.999999999975445,66,482,tube morphogenesis,BP,Astro,cells,hypergeometric
GO:0030155,8.68279071487428e-11,0.999999999971237,57,387,regulation of cell adhesion,BP,Astro,cells,hypergeometric
GO:0007165,9.41524365600417e-11,0.999999999946952,236,2800,signal transduction,BP,Astro,cells,hypergeometric
GO:0030334,1.17805283971223e-10,0.99999999995568,70,533,regulation of cell migration,BP,Astro,cells,hypergeometric
GO:2000145,3.34117405532434e-10,0.999999999869862,71,557,regulation of cell motility,BP,Astro,cells,hypergeometric
GO:0030054,3.46609389525566e-10,0.999999999824149,138,1411,cell junction,CC,Astro,cells,hypergeometric
GO:0065008,4.26114205046892e-10,0.999999999761513,202,2329,regulation of biological quality,BP,Astro,cells,hypergeometric
GO:0040012,4.87133154321505e-10,0.999999999805708,73,585,regulation of locomotion,BP,Astro,cells,hypergeometric
GO:2000026,5.60023136506847e-10,0.999999999753593,90,792,regulation of multicellular organismal development,BP,Astro,cells,hypergeometric
GO:0045595,5.89369425505273e-10,0.999999999727173,102,944,regulation of cell differentiation,BP,Astro,cells,hypergeometric
GO:0051270,7.96187344564735e-10,0.999999999674164,75,615,regulation of cellular component movement,BP,Astro,cells,hypergeometric
GO:0010646,8.11759412579514e-10,0.99999999955275,179,2008,regulation of cell communication,BP,Astro,cells,hypergeometric
GO:0051093,8.85156289619562e-10,0.9999999996512,69,546,negative regulation of developmental process,BP,Astro,cells,hypergeometric
GO:0008283,9.09163473274866e-10,0.999999999563474,110,1055,cell population proliferation,BP,Astro,cells,hypergeometric
GO:0023051,1.0788520241331e-09,0.999999999402871,179,2015,regulation of signaling,BP,Astro,cells,hypergeometric
GO:0010001,1.19721354517398e-09,0.999999999717366,32,163,glial cell differentiation,BP,Astro,cells,hypergeometric
GO:0030154,1.45810636500881e-09,0.999999999166228,205,2406,cell differentiation,BP,Astro,cells,hypergeometric
GO:0046890,1.53252583486616e-09,0.999999999714117,25,106,regulation of lipid biosynthetic process,BP,Astro,cells,hypergeometric
GO:0046889,2.02428071363462e-09,0.999999999749188,18,57,positive regulation of lipid biosynthetic process,BP,Astro,cells,hypergeometric
GO:0022008,2.08231584767478e-09,0.999999998942499,124,1257,neurogenesis,BP,Astro,cells,hypergeometric
GO:0009887,2.08939393845534e-09,0.999999999157062,69,557,animal organ morphogenesis,BP,Astro,cells,hypergeometric
GO:0019216,2.2032598383195e-09,0.999999999395754,37,213,regulation of lipid metabolic process,BP,Astro,cells,hypergeometric
GO:0008284,2.24860560710629e-09,0.999999999138847,62,477,positive regulation of cell population proliferation,BP,Astro,cells,hypergeometric
GO:0042221,2.28616618390352e-09,0.999999998716032,181,2063,response to chemical,BP,Astro,cells,hypergeometric
GO:0045834,2.58492469971266e-09,0.999999999547634,23,93,positive regulation of lipid metabolic process,BP,Astro,cells,hypergeometric
GO:0048869,2.92753927784188e-09,0.999999998304917,207,2455,cellular developmental process,BP,Astro,cells,hypergeometric
GO:0009719,2.99048954098322e-09,0.999999998626007,91,831,response to endogenous stimulus,BP,Astro,cells,hypergeometric
GO:0009888,3.30950058107223e-09,0.99999999839337,105,1013,tissue development,BP,Astro,cells,hypergeometric
GO:0010647,3.32300697718685e-09,0.999999998392054,104,1000,positive regulation of cell communication,BP,Astro,cells,hypergeometric
GO:0007166,3.64505497288252e-09,0.999999998097621,131,1364,cell surface receptor signaling pathway,BP,Astro,cells,hypergeometric
GO:0023056,3.70932555730282e-09,0.999999998200813,104,1002,positive regulation of signaling,BP,Astro,cells,hypergeometric
GO:0051094,4.21649830230481e-09,0.999999998055314,90,824,positive regulation of developmental process,BP,Astro,cells,hypergeometric
GO:0070161,4.39117631374772e-09,0.999999998424935,53,384,anchoring junction,CC,Astro,cells,hypergeometric
GO:0035295,5.58781615485718e-09,0.999999997622254,73,618,tube development,BP,Astro,cells,hypergeometric
GO:0045596,5.76038490414953e-09,0.999999997892839,54,398,negative regulation of cell differentiation,BP,Astro,cells,hypergeometric
GO:0031589,5.9967833923246e-09,0.999999998318919,36,211,cell-substrate adhesion,BP,Astro,cells,hypergeometric
GO:0050794,6.21404306705065e-09,0.999999996231846,422,6000,regulation of cellular process,BP,Astro,cells,hypergeometric
GO:0065007,6.72443995602097e-09,0.999999995984928,452,6540,biological regulation,BP,Astro,cells,hypergeometric
GO:0048583,7.3898677864195e-09,0.999999995758944,183,2123,regulation of response to stimulus,BP,Astro,cells,hypergeometric
GO:0006082,1.05267199182731e-08,0.999999995846492,60,473,organic acid metabolic process,BP,Astro,cells,hypergeometric
GO:0051716,1.09685180369356e-08,0.999999993243438,284,3694,cellular response to stimulus,BP,Astro,cells,hypergeometric
GO:0044255,1.50193330338184e-08,0.999999993724899,66,548,cellular lipid metabolic process,BP,Astro,cells,hypergeometric
GO:0048584,1.79664080473868e-08,0.999999990863702,108,1085,positive regulation of response to stimulus,BP,Astro,cells,hypergeometric
GO:0019752,2.34441936193163e-08,0.999999990673933,58,460,carboxylic acid metabolic process,BP,Astro,cells,hypergeometric
GO:0009891,2.80085570373402e-08,0.999999985374251,114,1175,positive regulation of biosynthetic process,BP,Astro,cells,hypergeometric
GO:0050789,2.9273699321517e-08,0.999999981938824,432,6234,regulation of biological process,BP,Astro,cells,hypergeometric
GO:0009605,3.3363301953517e-08,0.999999982652285,111,1138,response to external stimulus,BP,Astro,cells,hypergeometric
GO:0050839,3.39325805261809e-08,0.999999991067099,30,167,cell adhesion molecule binding,MF,Astro,cells,hypergeometric
GO:0043436,3.46310723107894e-08,0.999999986048829,58,465,oxoacid metabolic process,BP,Astro,cells,hypergeometric
GO:0009967,3.77585695096427e-08,0.999999981705278,89,849,positive regulation of signal transduction,BP,Astro,cells,hypergeometric
GO:0048708,3.86240408901955e-08,0.999999995324994,15,47,astrocyte differentiation,BP,Astro,cells,hypergeometric
GO:0001568,4.19904172349315e-08,0.999999984243863,50,376,blood vessel development,BP,Astro,cells,hypergeometric
GO:0016020,4.29749108503175e-08,0.999999972782896,339,4644,membrane,CC,Astro,cells,hypergeometric
GO:0001503,4.79641824218045e-08,0.999999985842503,34,208,ossification,BP,Astro,cells,hypergeometric
GO:0032879,5.0544490845239e-08,0.999999971042629,155,1765,regulation of localization,BP,Astro,cells,hypergeometric
GO:0042063,5.45121645884406e-08,0.999999983470434,35,219,gliogenesis,BP,Astro,cells,hypergeometric
GO:0034330,5.74393946021699e-08,0.999999975191006,65,555,cell junction organization,BP,Astro,cells,hypergeometric
GO:0001501,5.89930342913645e-08,0.999999980353696,40,271,skeletal system development,BP,Astro,cells,hypergeometric
GO:0048468,5.95886221251548e-08,0.999999966995075,133,1455,cell development,BP,Astro,cells,hypergeometric
GO:0032787,7.06271173788721e-08,0.999999975567765,42,294,monocarboxylic acid metabolic process,BP,Astro,cells,hypergeometric
GO:0098590,7.421625701968e-08,0.999999965158533,78,720,plasma membrane region,CC,Astro,cells,hypergeometric
GO:0010033,7.48888884976108e-08,0.99999995771573,141,1574,response to organic substance,BP,Astro,cells,hypergeometric
GO:0010810,7.6459541106726e-08,0.999999980758199,27,145,regulation of cell-substrate adhesion,BP,Astro,cells,hypergeometric
GO:0000902,8.02250354742659e-08,0.999999961192103,84,798,cell morphogenesis,BP,Astro,cells,hypergeometric
GO:0050673,8.6669338926871e-08,0.999999973147774,35,223,epithelial cell proliferation,BP,Astro,cells,hypergeometric
GO:0048699,9.92705509997116e-08,0.999999946968609,112,1175,generation of neurons,BP,Astro,cells,hypergeometric
GO:0009966,1.01295879361533e-07,0.999999941622992,150,1711,regulation of signal transduction,BP,Astro,cells,hypergeometric
GO:0010562,1.08200030748203e-07,0.999999953334373,62,528,positive regulation of phosphorus metabolic process,BP,Astro,cells,hypergeometric
GO:0045937,1.08200030748203e-07,0.999999953334373,62,528,positive regulation of phosphate metabolic process,BP,Astro,cells,hypergeometric
GO:0051239,3.99390325902153e-08,1,138,1424,regulation of multicellular organismal process,BP,Astro,nuclei,goseq
GO:0001503,4.39236858519491e-08,0.999999986952041,35,197,ossification,BP,Astro,nuclei,goseq
GO:0044281,6.63147157031458e-08,1,80,899,small molecule metabolic process,BP,Astro,nuclei,goseq
GO:0031325,8.12809284853972e-08,1,154,1865,positive regulation of cellular metabolic process,BP,Astro,nuclei,goseq
GO:0045944,8.85219353451814e-08,1,75,689,positive regulation of transcription by RNA polymerase II,BP,Astro,nuclei,goseq
GO:0009891,1.0736625182237e-07,1,103,1123,positive regulation of biosynthetic process,BP,Astro,nuclei,goseq
GO:0050793,1.07628942140249e-07,1,138,1432,regulation of developmental process,BP,Astro,nuclei,goseq
GO:0051173,1.1055673649489e-07,1,146,1750,positive regulation of nitrogen compound metabolic process,BP,Astro,nuclei,goseq
GO:0019752,1.29909700907481e-07,1,47,447,carboxylic acid metabolic process,BP,Astro,nuclei,goseq
GO:0048522,1.44819405957147e-07,1,248,3262,positive regulation of cellular process,BP,Astro,nuclei,goseq
GO:0009653,1.561204426594e-07,1,158,1603,anatomical structure morphogenesis,BP,Astro,nuclei,goseq
GO:0048518,1.71675331168024e-07,1,260,3470,positive regulation of biological process,BP,Astro,nuclei,goseq
GO:0009893,1.90420778651225e-07,1,167,2084,positive regulation of metabolic process,BP,Astro,nuclei,goseq
GO:0031328,1.98106257410612e-07,1,100,1098,positive regulation of cellular biosynthetic process,BP,Astro,nuclei,goseq
GO:0006357,2.38819317752704e-07,1,112,1324,regulation of transcription by RNA polymerase II,BP,Astro,nuclei,goseq
GO:0006082,2.71033818484076e-07,0.999999921977465,48,460,organic acid metabolic process,BP,Astro,nuclei,goseq
GO:0043436,3.01676636756553e-07,0.999999913537325,47,453,oxoacid metabolic process,BP,Astro,nuclei,goseq
GO:0045935,4.22194624141572e-07,1,100,1104,positive regulation of nucleobase-containing compound metabolic process,BP,Astro,nuclei,goseq
GO:0006629,4.94924510488478e-07,1,68,697,lipid metabolic process,BP,Astro,nuclei,goseq
GO:0001649,0.0000011326951346076,0.9999997201771,22,110,osteoblast differentiation,BP,Astro,nuclei,goseq
GO:0045595,0.00000118578788244601,0.999999582169145,91,891,regulation of cell differentiation,BP,Astro,nuclei,goseq
GO:0051093,0.0000013870138346438,0.999999553276797,61,517,negative regulation of developmental process,BP,Astro,nuclei,goseq
GO:0030155,0.00000147437022548382,0.999999547649094,52,371,regulation of cell adhesion,BP,Astro,nuclei,goseq
GO:0051254,0.00000150936983318316,0.999999464966078,91,986,positive regulation of RNA metabolic process,BP,Astro,nuclei,goseq
GO:0045596,0.00000180850867669073,0.999999266007566,48,379,negative regulation of cell differentiation,BP,Astro,nuclei,goseq
GO:0006366,0.00000199788728975316,0.999999043074287,112,1381,transcription by RNA polymerase II,BP,Astro,nuclei,goseq
GO:0045893,0.00000212835642654399,0.999999038341136,84,881,"positive regulation of transcription, DNA-templated",BP,Astro,nuclei,goseq
GO:1903508,0.00000212835642654399,0.999999038341136,84,881,positive regulation of nucleic acid-templated transcription,BP,Astro,nuclei,goseq
GO:1902680,0.00000240175919770486,0.999998911871806,84,883,positive regulation of RNA biosynthetic process,BP,Astro,nuclei,goseq
GO:0048731,0.00000285432438807378,0.999998505762142,223,2665,system development,BP,Astro,nuclei,goseq
GO:0003700,0.0000030718614485736,0.999998636389023,57,586,DNA-binding transcription factor activity,MF,Astro,nuclei,goseq
GO:0007155,0.00000359425139665468,0.999998361782449,85,677,cell adhesion,BP,Astro,nuclei,goseq
GO:0022610,0.00000384921452878812,0.999998242752706,85,679,biological adhesion,BP,Astro,nuclei,goseq
GO:0009888,0.00000389289591827084,0.99999815898786,99,972,tissue development,BP,Astro,nuclei,goseq
GO:0043209,0.0000043971262354753,0.999998774264615,22,168,myelin sheath,CC,Astro,nuclei,goseq
GO:0040011,0.00000488698561767692,0.999997650528912,106,1008,locomotion,BP,Astro,nuclei,goseq
GO:0044255,0.00000494957389492628,0.999997838882824,52,528,cellular lipid metabolic process,BP,Astro,nuclei,goseq
GO:0042221,0.00000544125193353913,0.999996918729212,161,1979,response to chemical,BP,Astro,nuclei,goseq
GO:0000981,0.00000583898697125223,0.999997418170477,53,547,"DNA-binding transcription factor activity, RNA polymerase II-specific",MF,Astro,nuclei,goseq
GO:0048870,0.00000680206517603016,0.999996459269324,96,905,cell motility,BP,Astro,nuclei,goseq
GO:0051674,0.00000680206517603016,0.999996459269324,96,905,localization of cell,BP,Astro,nuclei,goseq
GO:0032787,0.00000695733526574168,0.9999974476403,32,284,monocarboxylic acid metabolic process,BP,Astro,nuclei,goseq
GO:0010604,0.00000731275368375805,0.999995675404282,150,1913,positive regulation of macromolecule metabolic process,BP,Astro,nuclei,goseq
GO:0016477,0.00000771852496366679,0.999996027871715,90,821,cell migration,BP,Astro,nuclei,goseq
GO:0032502,0.00000903124241011466,0.999994340793273,268,3464,developmental process,BP,Astro,nuclei,goseq
GO:0050896,0.0000121039206043936,0.999992136735269,296,4122,response to stimulus,BP,Astro,nuclei,goseq
GO:0010557,0.0000127530152460501,0.999992894540789,91,1045,positive regulation of macromolecule biosynthetic process,BP,Astro,nuclei,goseq
GO:0098609,0.0000132427597920158,0.999993863130277,53,383,cell-cell adhesion,BP,Astro,nuclei,goseq
GO:0010033,0.0000171910420078587,0.999989718278022,124,1496,response to organic substance,BP,Astro,nuclei,goseq
GO:2000026,0.0000173219956313893,0.999990664314588,78,750,regulation of multicellular organismal development,BP,Astro,nuclei,goseq
GO:0044242,0.0000186208495376163,0.999995333578734,17,112,cellular lipid catabolic process,BP,Astro,nuclei,goseq
GO:0042127,0.0000197390271659446,0.999989267566125,79,819,regulation of cell population proliferation,BP,Astro,nuclei,goseq
GO:0051241,0.0000234440270468962,0.999988383988192,57,520,negative regulation of multicellular organismal process,BP,Astro,nuclei,goseq
GO:0048856,0.0000234565033469212,0.999984251502641,252,3222,anatomical structure development,BP,Astro,nuclei,goseq
GO:0048513,0.0000250144870997517,0.999984180631045,154,1774,animal organ development,BP,Astro,nuclei,goseq
GO:0007165,0.0000252876964544591,0.999983381607684,213,2696,signal transduction,BP,Astro,nuclei,goseq
GO:0048762,0.0000265860796427466,0.999992059979797,21,120,mesenchymal cell differentiation,BP,Astro,nuclei,goseq
GO:0010646,0.000028808703914495,0.999981441237141,161,1909,regulation of cell communication,BP,Astro,nuclei,goseq
GO:0046394,0.0000301050086770912,0.999991771954427,18,124,carboxylic acid biosynthetic process,BP,Astro,nuclei,goseq
GO:0009887,0.00003196464524094,0.999983361500032,65,544,animal organ morphogenesis,BP,Astro,nuclei,goseq
GO:0016053,0.0000324307311968326,0.999991079215226,18,125,organic acid biosynthetic process,BP,Astro,nuclei,goseq
GO:0046395,0.0000341034916698342,0.999991427018501,16,109,carboxylic acid catabolic process,BP,Astro,nuclei,goseq
GO:0045667,0.0000343804851064406,0.999991583081962,16,80,regulation of osteoblast differentiation,BP,Astro,nuclei,goseq
GO:0023051,0.0000365142218304559,0.999976356062387,161,1917,regulation of signaling,BP,Astro,nuclei,goseq
GO:0016054,0.0000368710425966484,0.999990662893571,16,110,organic acid catabolic process,BP,Astro,nuclei,goseq
GO:0006928,0.0000370913974866328,0.999977401865564,117,1193,movement of cell or subcellular component,BP,Astro,nuclei,goseq
GO:0001658,0.0000385591796082509,0.999996084046447,8,21,branching involved in ureteric bud morphogenesis,BP,Astro,nuclei,goseq
GO:0051240,0.0000395062593889766,0.999977943561517,78,776,positive regulation of multicellular organismal process,BP,Astro,nuclei,goseq
GO:0060485,0.0000423554011843323,0.999986056180483,23,140,mesenchyme development,BP,Astro,nuclei,goseq
GO:0009966,0.0000423728597774578,0.999973120776848,137,1622,regulation of signal transduction,BP,Astro,nuclei,goseq
GO:0007166,0.0000426421747034952,0.999973499662741,119,1319,cell surface receptor signaling pathway,BP,Astro,nuclei,goseq
GO:0010464,0.0000428773991700097,0.999994779807036,9,24,regulation of mesenchymal cell proliferation,BP,Astro,nuclei,goseq
GO:0001654,0.0000456427659542299,0.999981736205043,32,212,eye development,BP,Astro,nuclei,goseq
GO:0060675,0.0000473483193376401,0.999994011864088,9,26,ureteric bud morphogenesis,BP,Astro,nuclei,goseq
GO:0072171,0.0000473483193376401,0.999994011864088,9,26,mesonephric tubule morphogenesis,BP,Astro,nuclei,goseq
GO:0061740,0.0000478907976589492,1,3,3,protein targeting to lysosome involved in chaperone-mediated autophagy,BP,Astro,nuclei,goseq
GO:0007154,0.0000483001072113033,0.999966897149256,236,3053,cell communication,BP,Astro,nuclei,goseq
GO:0048880,0.000048449859606814,0.999980543463371,32,213,sensory system development,BP,Astro,nuclei,goseq
GO:0150063,0.000048449859606814,0.999980543463371,32,213,visual system development,BP,Astro,nuclei,goseq
GO:0015908,0.0000487786681103817,0.999993248828865,9,39,fatty acid transport,BP,Astro,nuclei,goseq
GO:0006796,0.000048787694816277,0.999969082594087,129,1608,phosphate-containing compound metabolic process,BP,Astro,nuclei,goseq
GO:0070887,0.000049831660367424,0.999968690333889,126,1537,cellular response to chemical stimulus,BP,Astro,nuclei,goseq
GO:0071310,0.0000504278417457625,0.999969383559036,105,1223,cellular response to organic substance,BP,Astro,nuclei,goseq
GO:0006793,0.0000507279180295867,0.999967778924793,130,1623,phosphorus metabolic process,BP,Astro,nuclei,goseq
GO:0035239,0.000051850842631315,0.999974040478952,53,452,tube morphogenesis,BP,Astro,nuclei,goseq
GO:0016042,0.0000528210358394831,0.999983648603145,20,151,lipid catabolic process,BP,Astro,nuclei,goseq
GO:0006631,0.0000531680059202513,0.999982379741884,22,184,fatty acid metabolic process,BP,Astro,nuclei,goseq
GO:0023052,0.0000538291912789853,0.999963052118965,234,3017,signaling,BP,Astro,nuclei,goseq
GO:0010562,0.0000539543588985429,0.99997245133164,55,512,positive regulation of phosphorus metabolic process,BP,Astro,nuclei,goseq
GO:0045937,0.0000539543588985429,0.99997245133164,55,512,positive regulation of phosphate metabolic process,BP,Astro,nuclei,goseq
GO:0007275,0.0000608239439524451,0.999958141278783,235,2986,multicellular organism development,BP,Astro,nuclei,goseq
GO:0090596,0.0000745604438719506,0.999972687971299,26,151,sensory organ morphogenesis,BP,Astro,nuclei,goseq
GO:0000987,0.0000801791255260447,0.999959823569814,49,534,cis-regulatory region sequence-specific DNA binding,MF,Astro,nuclei,goseq
GO:0008283,0.0000803453770464994,0.999952135967526,89,998,cell population proliferation,BP,Astro,nuclei,goseq
GO:0008610,0.0000815457942173836,0.999962978752525,38,374,lipid biosynthetic process,BP,Astro,nuclei,goseq
GO:0010463,0.0000817705644672777,0.999988865421979,9,26,mesenchymal cell proliferation,BP,Astro,nuclei,goseq
GO:0030154,0.0000843098594973043,0.999942586272893,189,2314,cell differentiation,BP,Astro,nuclei,goseq
GO:0008284,0.0000857435803444975,0.999957508039481,48,450,positive regulation of cell population proliferation,BP,Astro,nuclei,goseq
GO:0043114,0.0000857871755070431,0.999988241861403,9,26,regulation of vascular permeability,BP,Astro,nuclei,goseq
GO:0007423,0.0000883100257601951,0.999958925781342,41,306,sensory organ development,BP,Astro,nuclei,goseq
GO:0009653,8.99348529223072e-15,0.999999999999996,158,1603,anatomical structure morphogenesis,BP,Astro,nuclei,hypergeometric
GO:0007155,2.13402224627018e-13,0.999999999999923,85,677,cell adhesion,BP,Astro,nuclei,hypergeometric
GO:0022610,2.52205339181037e-13,0.999999999999909,85,679,biological adhesion,BP,Astro,nuclei,hypergeometric
GO:0048731,3.07703189629352e-13,0.999999999999843,223,2665,system development,BP,Astro,nuclei,hypergeometric
GO:0032502,2.90687159444039e-12,0.999999999998433,268,3464,developmental process,BP,Astro,nuclei,hypergeometric
GO:0051239,3.16248812718725e-12,0.999999999998529,138,1424,regulation of multicellular organismal process,BP,Astro,nuclei,hypergeometric
GO:0050793,4.8270924439598e-12,0.999999999997739,138,1432,regulation of developmental process,BP,Astro,nuclei,hypergeometric
GO:0048856,7.74673578560914e-12,0.999999999995801,252,3222,anatomical structure development,BP,Astro,nuclei,hypergeometric
GO:0040011,1.66059608271991e-11,0.999999999992772,106,1008,locomotion,BP,Astro,nuclei,hypergeometric
GO:0005886,3.37912734844658e-11,0.999999999981973,202,2446,plasma membrane,CC,Astro,nuclei,hypergeometric
GO:0007275,4.12863214277643e-11,0.999999999977332,235,2986,multicellular organism development,BP,Astro,nuclei,hypergeometric
GO:0071944,7.50585576350548e-11,0.999999999959128,212,2627,cell periphery,CC,Astro,nuclei,hypergeometric
GO:0016477,8.54070659024534e-11,0.999999999964076,90,821,cell migration,BP,Astro,nuclei,hypergeometric
GO:0030054,9.63893419394929e-11,0.999999999953462,129,1361,cell junction,CC,Astro,nuclei,hypergeometric
GO:0006928,1.11400564477651e-10,0.999999999947801,117,1193,movement of cell or subcellular component,BP,Astro,nuclei,hypergeometric
GO:0048870,1.14083264170064e-10,0.999999999950376,96,905,cell motility,BP,Astro,nuclei,hypergeometric
GO:0051674,1.14083264170064e-10,0.999999999950376,96,905,localization of cell,BP,Astro,nuclei,hypergeometric
GO:0032501,1.33749681626936e-10,0.999999999924031,277,3729,multicellular organismal process,BP,Astro,nuclei,hypergeometric
GO:0007399,1.51723619984243e-10,0.999999999923959,142,1560,nervous system development,BP,Astro,nuclei,hypergeometric
GO:0023052,2.21512901203705e-10,0.999999999875573,234,3017,signaling,BP,Astro,nuclei,hypergeometric
GO:0007154,2.44029734927968e-10,0.999999999862577,236,3053,cell communication,BP,Astro,nuclei,hypergeometric
GO:0030155,3.00571119032405e-10,0.999999999902318,52,371,regulation of cell adhesion,BP,Astro,nuclei,hypergeometric
GO:0098609,3.2322052883245e-10,0.999999999893432,53,383,cell-cell adhesion,BP,Astro,nuclei,hypergeometric
GO:0048522,3.23888783871724e-10,0.999999999815731,248,3262,positive regulation of cellular process,BP,Astro,nuclei,hypergeometric
GO:0048518,3.81091810219171e-10,0.999999999781599,260,3470,positive regulation of biological process,BP,Astro,nuclei,hypergeometric
GO:0001503,5.08227661188769e-10,0.999999999874561,35,197,ossification,BP,Astro,nuclei,hypergeometric
GO:0007165,5.11928791925829e-10,0.999999999713057,213,2696,signal transduction,BP,Astro,nuclei,hypergeometric
GO:0009888,5.46511075152209e-10,0.999999999751107,99,972,tissue development,BP,Astro,nuclei,hypergeometric
GO:0030154,5.88707512738684e-10,0.999999999676461,189,2314,cell differentiation,BP,Astro,nuclei,hypergeometric
GO:0048513,6.86132284192153e-10,0.999999999639155,154,1774,animal organ development,BP,Astro,nuclei,hypergeometric
GO:0048869,8.91860009198403e-10,0.999999999505622,191,2357,cellular developmental process,BP,Astro,nuclei,hypergeometric
GO:0050896,9.33854901536886e-10,0.999999999453487,296,4122,response to stimulus,BP,Astro,nuclei,hypergeometric
GO:0009887,1.59991318117161e-09,0.999999999378673,65,544,animal organ morphogenesis,BP,Astro,nuclei,hypergeometric
GO:0010646,2.1219791006609e-09,0.999999998849667,161,1909,regulation of cell communication,BP,Astro,nuclei,hypergeometric
GO:0045595,2.72508040895808e-09,0.999999998754084,91,891,regulation of cell differentiation,BP,Astro,nuclei,hypergeometric
GO:0023051,2.90228256289189e-09,0.99999999841809,161,1917,regulation of signaling,BP,Astro,nuclei,hypergeometric
GO:0045944,5.49077553596016e-09,0.999999997640153,75,689,positive regulation of transcription by RNA polymerase II,BP,Astro,nuclei,hypergeometric
GO:0022008,8.65427903602256e-09,0.999999995647594,111,1194,neurogenesis,BP,Astro,nuclei,hypergeometric
GO:0051093,8.66145188846916e-09,0.999999996576119,61,517,negative regulation of developmental process,BP,Astro,nuclei,hypergeometric
GO:0007166,1.28253723406498e-08,0.999999993356901,119,1319,cell surface receptor signaling pathway,BP,Astro,nuclei,hypergeometric
GO:2000026,2.01923390659751e-08,0.999999990866194,78,750,regulation of multicellular organismal development,BP,Astro,nuclei,hypergeometric
GO:0030334,2.22837310757934e-08,0.999999991077382,59,505,regulation of cell migration,BP,Astro,nuclei,hypergeometric
GO:0031325,2.47766998350208e-08,0.999999986104152,154,1865,positive regulation of cellular metabolic process,BP,Astro,nuclei,hypergeometric
GO:0051270,2.92179223304752e-08,0.999999987647882,65,585,regulation of cellular component movement,BP,Astro,nuclei,hypergeometric
GO:0042221,2.93549016001448e-08,0.999999983323652,161,1979,response to chemical,BP,Astro,nuclei,hypergeometric
GO:0034330,3.36762043985831e-08,0.999999986116567,61,536,cell junction organization,BP,Astro,nuclei,hypergeometric
GO:0051173,3.44386013392528e-08,0.999999980800095,146,1750,positive regulation of nitrogen compound metabolic process,BP,Astro,nuclei,hypergeometric
GO:0045596,4.18256349836377e-08,0.999999984652543,48,379,negative regulation of cell differentiation,BP,Astro,nuclei,hypergeometric
GO:0009893,4.22967251542503e-08,0.999999975626516,167,2084,positive regulation of metabolic process,BP,Astro,nuclei,hypergeometric
GO:2000145,4.98271039923406e-08,0.999999979363933,60,529,regulation of cell motility,BP,Astro,nuclei,hypergeometric
GO:0009966,5.05552790001987e-08,0.999999972029998,137,1622,regulation of signal transduction,BP,Astro,nuclei,hypergeometric
GO:0050794,6.2171586833292e-08,0.999999961862923,378,5772,regulation of cellular process,BP,Astro,nuclei,hypergeometric
GO:0048699,6.52239966278498e-08,0.99999996647107,103,1122,generation of neurons,BP,Astro,nuclei,hypergeometric
GO:0009891,6.82630356099363e-08,0.999999964871341,103,1123,positive regulation of biosynthetic process,BP,Astro,nuclei,hypergeometric
GO:0048468,7.17817584448848e-08,0.999999961168174,122,1404,cell development,BP,Astro,nuclei,hypergeometric
GO:0051240,8.78566228262424e-08,0.999999958641285,78,776,positive regulation of multicellular organismal process,BP,Astro,nuclei,hypergeometric
GO:0007423,8.96707962340833e-08,0.999999969092732,41,306,sensory organ development,BP,Astro,nuclei,hypergeometric
GO:0001649,1.0104849437933e-07,0.999999978513127,22,110,osteoblast differentiation,BP,Astro,nuclei,hypergeometric
GO:0035239,1.08116554586337e-07,0.999999956735553,53,452,tube morphogenesis,BP,Astro,nuclei,hypergeometric
GO:0030182,1.30996730978492e-07,0.999999933239833,95,1022,neuron differentiation,BP,Astro,nuclei,hypergeometric
GO:0051716,1.45004742285928e-07,0.999999909332192,254,3567,cellular response to stimulus,BP,Astro,nuclei,hypergeometric
GO:0040012,1.4550503663449e-07,0.999999937152078,61,558,regulation of locomotion,BP,Astro,nuclei,hypergeometric
GO:0031328,1.56772868353769e-07,0.999999918449402,100,1098,positive regulation of cellular biosynthetic process,BP,Astro,nuclei,hypergeometric
GO:0001654,1.59456245874637e-07,0.99999995213316,32,212,eye development,BP,Astro,nuclei,hypergeometric
GO:0090596,1.70179133652187e-07,0.999999956402268,26,151,sensory organ morphogenesis,BP,Astro,nuclei,hypergeometric
GO:0050789,1.71185418815498e-07,0.999999893819943,388,6002,regulation of biological process,BP,Astro,nuclei,hypergeometric
GO:0031589,1.78140626858156e-07,0.999999946227284,32,213,cell-substrate adhesion,BP,Astro,nuclei,hypergeometric
GO:0048880,1.78140626858156e-07,0.999999946227284,32,213,sensory system development,BP,Astro,nuclei,hypergeometric
GO:0150063,1.78140626858156e-07,0.999999946227284,32,213,visual system development,BP,Astro,nuclei,hypergeometric
GO:0045935,2.04567517258206e-07,0.999999892893415,100,1104,positive regulation of nucleobase-containing compound metabolic process,BP,Astro,nuclei,hypergeometric
GO:0048583,2.37181038366116e-07,0.99999985982427,161,2040,regulation of response to stimulus,BP,Astro,nuclei,hypergeometric
GO:0045893,2.70656064255047e-07,0.999999865047673,84,881,"positive regulation of transcription, DNA-templated",BP,Astro,nuclei,hypergeometric
GO:1903508,2.70656064255047e-07,0.999999865047673,84,881,positive regulation of nucleic acid-templated transcription,BP,Astro,nuclei,hypergeometric
GO:0065007,2.71338881253937e-07,0.9999998318125,402,6289,biological regulation,BP,Astro,nuclei,hypergeometric
GO:1902680,2.98404871465113e-07,0.999999850815876,84,883,positive regulation of RNA biosynthetic process,BP,Astro,nuclei,hypergeometric
GO:0070161,3.40247099661409e-07,0.999999869402562,45,369,anchoring junction,CC,Astro,nuclei,hypergeometric
GO:0000902,3.43802168203159e-07,0.99999983261575,77,788,cell morphogenesis,BP,Astro,nuclei,hypergeometric
GO:0060429,3.4890616702964e-07,0.999999844925854,61,572,epithelium development,BP,Astro,nuclei,hypergeometric
GO:0051254,3.50837772702745e-07,0.999999819146496,91,986,positive regulation of RNA metabolic process,BP,Astro,nuclei,hypergeometric
GO:0051241,3.51910202315798e-07,0.999999848126695,57,520,negative regulation of multicellular organismal process,BP,Astro,nuclei,hypergeometric
GO:0042127,4.03926608181823e-07,0.999999800624068,79,819,regulation of cell population proliferation,BP,Astro,nuclei,hypergeometric
GO:0005515,4.64974391849525e-07,0.999999702740269,351,5348,protein binding,MF,Astro,nuclei,hypergeometric
GO:0002009,6.20822182975166e-07,0.999999777640754,38,293,morphogenesis of an epithelium,BP,Astro,nuclei,hypergeometric
GO:0010033,7.63361032148424e-07,0.999999563084138,124,1496,response to organic substance,BP,Astro,nuclei,hypergeometric
GO:0010810,8.23804923687784e-07,0.999999782701639,24,143,regulation of cell-substrate adhesion,BP,Astro,nuclei,hypergeometric
GO:0051094,8.46190747135349e-07,0.999999580943922,75,778,positive regulation of developmental process,BP,Astro,nuclei,hypergeometric
GO:0043010,9.03052725798874e-07,0.999999730069246,28,185,camera-type eye development,BP,Astro,nuclei,hypergeometric
GO:0010647,9.68871885984491e-07,0.999999493952917,87,951,positive regulation of cell communication,BP,Astro,nuclei,hypergeometric
GO:0098772,0.00000101303622552924,0.999999470233329,87,952,molecular function regulator,MF,Astro,nuclei,hypergeometric
GO:0023056,0.0000010590979605164,0.999999445463343,87,953,positive regulation of signaling,BP,Astro,nuclei,hypergeometric
GO:0010562,0.00000109154324452145,0.999999517389301,55,512,positive regulation of phosphorus metabolic process,BP,Astro,nuclei,hypergeometric
GO:0045937,0.00000109154324452145,0.999999517389301,55,512,positive regulation of phosphate metabolic process,BP,Astro,nuclei,hypergeometric
GO:0000904,0.0000010924653187039,0.999999498888125,60,578,cell morphogenesis involved in differentiation,BP,Astro,nuclei,hypergeometric
GO:0070887,0.00000109919282789048,0.999999363222483,126,1537,cellular response to chemical stimulus,BP,Astro,nuclei,hypergeometric
GO:0010604,0.00000110871773817447,0.999999333228758,150,1913,positive regulation of macromolecule metabolic process,BP,Astro,nuclei,hypergeometric
GO:0006357,0.0000011291742570834,0.999999363909751,112,1324,regulation of transcription by RNA polymerase II,BP,Astro,nuclei,hypergeometric
GO:0030030,0.00000124985236013199,0.999999315136693,100,1147,cell projection organization,BP,Astro,nuclei,hypergeometric
GO:0006468,0.00000127399506432254,0.999999336843392,84,914,protein phosphorylation,BP,Astro,nuclei,hypergeometric
GO:0071310,0.00000132832068553438,0.999999261256828,105,1223,cellular response to organic substance,BP,Astro,nuclei,hypergeometric
GO:0048729,0.00000154301731266305,0.999999399414909,41,340,tissue morphogenesis,BP,Astro,nuclei,hypergeometric
GO:0022626,8.06198120642279e-65,1,66,90,cytosolic ribosome,CC,Endo,cells,goseq
GO:0003735,1.88965833994488e-46,1,67,148,structural constituent of ribosome,MF,Endo,cells,goseq
GO:0005198,9.90884042050059e-41,1,102,329,structural molecule activity,MF,Endo,cells,goseq
GO:0044391,1.08435880815267e-40,1,66,168,ribosomal subunit,CC,Endo,cells,goseq
GO:0005840,2.47102723621613e-37,1,69,199,ribosome,CC,Endo,cells,goseq
GO:0022625,6.2291490598306e-35,1,35,48,cytosolic large ribosomal subunit,CC,Endo,cells,goseq
GO:0022627,1.96899514895854e-32,1,31,40,cytosolic small ribosomal subunit,CC,Endo,cells,goseq
GO:2000145,5.34526877334185e-27,1,126,557,regulation of cell motility,BP,Endo,cells,goseq
GO:0030334,3.03552677853278e-26,1,122,533,regulation of cell migration,BP,Endo,cells,goseq
GO:0040012,4.52945417725194e-26,1,128,585,regulation of locomotion,BP,Endo,cells,goseq
GO:0051270,9.9232518932159e-26,1,131,615,regulation of cellular component movement,BP,Endo,cells,goseq
GO:0001568,1.60255530610465e-25,1,96,376,blood vessel development,BP,Endo,cells,goseq
GO:0001944,1.92833540290283e-25,1,99,399,vasculature development,BP,Endo,cells,goseq
GO:0016477,6.79237516317954e-25,1,160,852,cell migration,BP,Endo,cells,goseq
GO:0048514,9.60568329470167e-25,1,86,320,blood vessel morphogenesis,BP,Endo,cells,goseq
GO:0048870,1.21200680697094e-23,1,165,925,cell motility,BP,Endo,cells,goseq
GO:0051674,1.21200680697094e-23,1,165,925,localization of cell,BP,Endo,cells,goseq
GO:0040011,8.14148561782499e-23,1,176,1029,locomotion,BP,Endo,cells,goseq
GO:0015935,8.33461749790508e-23,1,32,69,small ribosomal subunit,CC,Endo,cells,goseq
GO:0035239,3.78529378817683e-22,1,105,482,tube morphogenesis,BP,Endo,cells,goseq
GO:0072359,4.3335650266047e-22,1,125,635,circulatory system development,BP,Endo,cells,goseq
GO:0050896,1.30217640681716e-21,1,446,4269,response to stimulus,BP,Endo,cells,goseq
GO:0030335,6.1113047108731e-21,1,80,312,positive regulation of cell migration,BP,Endo,cells,goseq
GO:2000147,2.44234834389207e-20,1,80,320,positive regulation of cell motility,BP,Endo,cells,goseq
GO:0007165,2.88922993728699e-20,1,330,2800,signal transduction,BP,Endo,cells,goseq
GO:0006928,7.33777329347527e-20,1,189,1217,movement of cell or subcellular component,BP,Endo,cells,goseq
GO:0015934,7.95311711548662e-20,1,35,103,large ribosomal subunit,CC,Endo,cells,goseq
GO:0040017,1.36595779436983e-19,1,80,329,positive regulation of locomotion,BP,Endo,cells,goseq
GO:0051272,2.04713130142749e-19,1,80,332,positive regulation of cellular component movement,BP,Endo,cells,goseq
GO:0001667,2.35926736118182e-19,1,69,260,ameboidal-type cell migration,BP,Endo,cells,goseq
GO:0035556,3.8060429061259e-19,1,210,1527,intracellular signal transduction,BP,Endo,cells,goseq
GO:0042127,1.86125941060748e-18,1,138,870,regulation of cell population proliferation,BP,Endo,cells,goseq
GO:0070161,6.81912801183258e-18,1,87,384,anchoring junction,CC,Endo,cells,goseq
GO:0035295,8.77522847964918e-18,1,113,618,tube development,BP,Endo,cells,goseq
GO:0051716,9.71912463356805e-18,1,389,3694,cellular response to stimulus,BP,Endo,cells,goseq
GO:0008283,1.10674447612112e-17,1,155,1055,cell population proliferation,BP,Endo,cells,goseq
GO:0001525,1.50708297171524e-17,1,66,265,angiogenesis,BP,Endo,cells,goseq
GO:0048523,2.2982258214374e-17,1,324,2976,negative regulation of cellular process,BP,Endo,cells,goseq
GO:0023052,2.42950187520093e-17,1,350,3134,signaling,BP,Endo,cells,goseq
GO:0002376,5.60082011947448e-17,1,156,1125,immune system process,BP,Endo,cells,goseq
GO:0007154,6.24557255359134e-17,1,351,3169,cell communication,BP,Endo,cells,goseq
GO:0030054,1.45900697698683e-16,1,202,1411,cell junction,CC,Endo,cells,goseq
GO:0048522,1.89642863183362e-16,1,359,3420,positive regulation of cellular process,BP,Endo,cells,goseq
GO:0071944,8.05761000584985e-16,1,317,2702,cell periphery,CC,Endo,cells,goseq
GO:0010631,1.19684481963649e-15,1,51,180,epithelial cell migration,BP,Endo,cells,goseq
GO:0090130,1.19684481963649e-15,1,51,180,tissue migration,BP,Endo,cells,goseq
GO:0090132,1.19684481963649e-15,1,51,180,epithelium migration,BP,Endo,cells,goseq
GO:0048519,1.22117770429046e-15,1,337,3224,negative regulation of biological process,BP,Endo,cells,goseq
GO:0030029,1.31049732554905e-15,1,101,521,actin filament-based process,BP,Endo,cells,goseq
GO:0005515,1.48041027458578e-15,1,515,5559,protein binding,MF,Endo,cells,goseq
GO:0009966,1.78280899802323e-15,1,215,1711,regulation of signal transduction,BP,Endo,cells,goseq
GO:0048583,2.06844606367039e-15,1,251,2123,regulation of response to stimulus,BP,Endo,cells,goseq
GO:0048518,2.4849855287918e-15,1,371,3632,positive regulation of biological process,BP,Endo,cells,goseq
GO:0030036,2.80811872694812e-15,1,92,460,actin cytoskeleton organization,BP,Endo,cells,goseq
GO:0005911,4.43889037128644e-15,1,70,303,cell-cell junction,CC,Endo,cells,goseq
GO:0042788,7.63220970495759e-15,1,18,32,polysomal ribosome,CC,Endo,cells,goseq
GO:1902531,9.85436838766232e-15,1,141,979,regulation of intracellular signal transduction,BP,Endo,cells,goseq
GO:0005829,1.06986804966903e-14,1,278,2623,cytosol,CC,Endo,cells,goseq
GO:0070887,1.52285710943486e-14,1,198,1609,cellular response to chemical stimulus,BP,Endo,cells,goseq
GO:0050794,2.37836114943819e-14,1,540,6000,regulation of cellular process,BP,Endo,cells,goseq
GO:0007264,2.62180968479259e-14,1,68,304,small GTPase mediated signal transduction,BP,Endo,cells,goseq
GO:0002181,3.30840704400303e-14,1,27,83,cytoplasmic translation,BP,Endo,cells,goseq
GO:0007015,3.34971658784521e-14,1,66,293,actin filament organization,BP,Endo,cells,goseq
GO:0009967,3.96304462801571e-14,1,127,849,positive regulation of signal transduction,BP,Endo,cells,goseq
GO:0009653,8.02615817794982e-14,1,214,1649,anatomical structure morphogenesis,BP,Endo,cells,goseq
GO:0015629,8.28462006439943e-14,1,68,316,actin cytoskeleton,CC,Endo,cells,goseq
GO:1902533,1.09232752580855e-13,1,92,541,positive regulation of intracellular signal transduction,BP,Endo,cells,goseq
GO:0010632,1.54699267895325e-13,1,42,142,regulation of epithelial cell migration,BP,Endo,cells,goseq
GO:0048646,1.63526309003183e-13,1,102,621,anatomical structure formation involved in morphogenesis,BP,Endo,cells,goseq
GO:0050789,1.66000364040341e-13,1,552,6234,regulation of biological process,BP,Endo,cells,goseq
GO:0005886,1.68706111164287e-13,1,291,2513,plasma membrane,CC,Endo,cells,goseq
GO:1901342,3.56444418846805e-13,1,39,133,regulation of vasculature development,BP,Endo,cells,goseq
GO:0008219,3.7859005667596e-13,1,158,1276,cell death,BP,Endo,cells,goseq
GO:0048584,3.88633852176756e-13,1,147,1085,positive regulation of response to stimulus,BP,Endo,cells,goseq
GO:0065007,4.42456821991323e-13,1,571,6540,biological regulation,BP,Endo,cells,goseq
GO:0010646,5.52235231872169e-13,1,236,2008,regulation of cell communication,BP,Endo,cells,goseq
GO:0051239,6.20268876435624e-13,1,187,1483,regulation of multicellular organismal process,BP,Endo,cells,goseq
GO:0032502,7.54985650534397e-13,1,371,3605,developmental process,BP,Endo,cells,goseq
GO:0023051,7.87697941190158e-13,1,236,2015,regulation of signaling,BP,Endo,cells,goseq
GO:0045765,8.73652050668082e-13,1,38,130,regulation of angiogenesis,BP,Endo,cells,goseq
GO:0005844,9.02028638589362e-13,1,24,68,polysome,CC,Endo,cells,goseq
GO:0007265,1.19627709740964e-12,1,53,227,Ras protein signal transduction,BP,Endo,cells,goseq
GO:0071310,1.2039911030236e-12,1,162,1281,cellular response to organic substance,BP,Endo,cells,goseq
GO:0042221,1.25362933126495e-12,1,232,2063,response to chemical,BP,Endo,cells,goseq
GO:0019843,1.27577126335522e-12,1,22,66,rRNA binding,MF,Endo,cells,goseq
GO:0050678,1.33212283919986e-12,1,46,189,regulation of epithelial cell proliferation,BP,Endo,cells,goseq
GO:0048856,1.55417504627e-12,1,350,3345,anatomical structure development,BP,Endo,cells,goseq
GO:0022610,1.55797048530394e-12,1,116,689,biological adhesion,BP,Endo,cells,goseq
GO:0010941,1.78226159220576e-12,1,132,1017,regulation of cell death,BP,Endo,cells,goseq
GO:0012501,2.2649794029935e-12,1,145,1161,programmed cell death,BP,Endo,cells,goseq
GO:0006412,2.44606216454869e-12,1,75,524,translation,BP,Endo,cells,goseq
GO:0043067,2.47613604473867e-12,1,121,905,regulation of programmed cell death,BP,Endo,cells,goseq
GO:0008284,2.87152202342755e-12,1,80,477,positive regulation of cell population proliferation,BP,Endo,cells,goseq
GO:0007155,3.04109775057482e-12,1,115,687,cell adhesion,BP,Endo,cells,goseq
GO:0097435,3.05304039795014e-12,1,82,464,supramolecular fiber organization,BP,Endo,cells,goseq
GO:0048731,3.17977162844255e-12,1,304,2779,system development,BP,Endo,cells,goseq
GO:0006915,3.64544068742196e-12,1,142,1134,apoptotic process,BP,Endo,cells,goseq
GO:0042981,3.68737373766529e-12,1,119,888,regulation of apoptotic process,BP,Endo,cells,goseq
GO:0009888,4.18019436593966e-12,1,140,1013,tissue development,BP,Endo,cells,goseq
GO:0043043,4.57504228031543e-12,1,76,537,peptide biosynthetic process,BP,Endo,cells,goseq
GO:0022626,1.23562272173729e-56,1,66,90,cytosolic ribosome,CC,Endo,cells,hypergeometric
GO:0005198,9.17801060983293e-40,1,102,329,structural molecule activity,MF,Endo,cells,hypergeometric
GO:0003735,4.90251342414716e-38,1,67,148,structural constituent of ribosome,MF,Endo,cells,hypergeometric
GO:2000145,1.80182337586575e-33,1,126,557,regulation of cell motility,BP,Endo,cells,hypergeometric
GO:0030334,6.52598248027624e-33,1,122,533,regulation of cell migration,BP,Endo,cells,hypergeometric
GO:0044391,7.22359483824361e-33,1,66,168,ribosomal subunit,CC,Endo,cells,hypergeometric
GO:0040012,1.84823204640967e-32,1,128,585,regulation of locomotion,BP,Endo,cells,hypergeometric
GO:0016477,2.08389268397366e-32,1,160,852,cell migration,BP,Endo,cells,hypergeometric
GO:0051270,5.59369733015848e-32,1,131,615,regulation of cellular component movement,BP,Endo,cells,hypergeometric
GO:0048870,1.11541423500135e-30,1,165,925,cell motility,BP,Endo,cells,hypergeometric
GO:0051674,1.11541423500135e-30,1,165,925,localization of cell,BP,Endo,cells,hypergeometric
GO:0040011,1.69140249726743e-30,1,176,1029,locomotion,BP,Endo,cells,hypergeometric
GO:0005840,2.33830726072897e-30,1,69,199,ribosome,CC,Endo,cells,hypergeometric
GO:0022625,2.75415418741417e-30,1,35,48,cytosolic large ribosomal subunit,CC,Endo,cells,hypergeometric
GO:0001568,8.23416614728223e-30,1,96,376,blood vessel development,BP,Endo,cells,hypergeometric
GO:0001944,1.1961439966114e-29,1,99,399,vasculature development,BP,Endo,cells,hypergeometric
GO:0048514,1.84393875087782e-28,1,86,320,blood vessel morphogenesis,BP,Endo,cells,hypergeometric
GO:0022627,2.33190830502988e-28,1,31,40,cytosolic small ribosomal subunit,CC,Endo,cells,hypergeometric
GO:0006928,2.58401369287887e-27,1,189,1217,movement of cell or subcellular component,BP,Endo,cells,hypergeometric
GO:0072359,4.88883857664478e-27,1,125,635,circulatory system development,BP,Endo,cells,hypergeometric
GO:0050896,7.93731473383583e-27,1,446,4269,response to stimulus,BP,Endo,cells,hypergeometric
GO:0007165,2.16575557397553e-26,1,330,2800,signal transduction,BP,Endo,cells,hypergeometric
GO:0035239,2.22031852052929e-26,1,105,482,tube morphogenesis,BP,Endo,cells,hypergeometric
GO:0030335,4.95493816376982e-25,1,80,312,positive regulation of cell migration,BP,Endo,cells,hypergeometric
GO:0071944,1.19968264603167e-24,1,317,2702,cell periphery,CC,Endo,cells,hypergeometric
GO:0030054,1.28900599035112e-24,1,202,1411,cell junction,CC,Endo,cells,hypergeometric
GO:2000147,2.9839382229578e-24,1,80,320,positive regulation of cell motility,BP,Endo,cells,hypergeometric
GO:0023052,7.27231542771677e-24,1,350,3134,signaling,BP,Endo,cells,hypergeometric
GO:0040017,2.07691354390362e-23,1,80,329,positive regulation of locomotion,BP,Endo,cells,hypergeometric
GO:0035556,2.26829945744497e-23,1,210,1527,intracellular signal transduction,BP,Endo,cells,hypergeometric
GO:0007154,2.93089458344944e-23,1,351,3169,cell communication,BP,Endo,cells,hypergeometric
GO:0051272,3.89525363838265e-23,1,80,332,positive regulation of cellular component movement,BP,Endo,cells,hypergeometric
GO:0070161,3.93200091496376e-23,1,87,384,anchoring junction,CC,Endo,cells,hypergeometric
GO:0001667,1.30221987146871e-22,1,69,260,ameboidal-type cell migration,BP,Endo,cells,hypergeometric
GO:0051716,3.01435985700876e-22,1,389,3694,cellular response to stimulus,BP,Endo,cells,hypergeometric
GO:0035295,1.19533014483413e-21,1,113,618,tube development,BP,Endo,cells,hypergeometric
GO:0030029,2.65475437370345e-21,1,101,521,actin filament-based process,BP,Endo,cells,hypergeometric
GO:0005886,3.82227925647776e-21,1,291,2513,plasma membrane,CC,Endo,cells,hypergeometric
GO:0009653,1.39735804717402e-20,1,214,1649,anatomical structure morphogenesis,BP,Endo,cells,hypergeometric
GO:0042127,1.97009369644227e-20,1,138,870,regulation of cell population proliferation,BP,Endo,cells,hypergeometric
GO:0030036,2.1110742161778e-20,1,92,460,actin cytoskeleton organization,BP,Endo,cells,hypergeometric
GO:0001525,4.79154278756324e-20,1,66,265,angiogenesis,BP,Endo,cells,hypergeometric
GO:0008283,1.27015631736004e-19,1,155,1055,cell population proliferation,BP,Endo,cells,hypergeometric
GO:0048523,1.48022382553344e-19,1,324,2976,negative regulation of cellular process,BP,Endo,cells,hypergeometric
GO:0048522,1.63053593199103e-19,1,359,3420,positive regulation of cellular process,BP,Endo,cells,hypergeometric
GO:0005515,1.89172594623604e-19,1,515,5559,protein binding,MF,Endo,cells,hypergeometric
GO:0005911,3.03023892026123e-19,1,70,303,cell-cell junction,CC,Endo,cells,hypergeometric
GO:0022610,3.24298020295017e-19,1,116,689,biological adhesion,BP,Endo,cells,hypergeometric
GO:0015935,4.02789129355928e-19,1,32,69,small ribosomal subunit,CC,Endo,cells,hypergeometric
GO:0009966,6.1827358890113e-19,1,215,1711,regulation of signal transduction,BP,Endo,cells,hypergeometric
GO:0048583,7.16080419075134e-19,1,251,2123,regulation of response to stimulus,BP,Endo,cells,hypergeometric
GO:0007155,7.53822502957811e-19,1,115,687,cell adhesion,BP,Endo,cells,hypergeometric
GO:0032502,8.02546295292843e-19,1,371,3605,developmental process,BP,Endo,cells,hypergeometric
GO:0048856,1.41022937495334e-18,1,350,3345,anatomical structure development,BP,Endo,cells,hypergeometric
GO:0048731,2.5981615256664e-18,1,304,2779,system development,BP,Endo,cells,hypergeometric
GO:0010631,2.64827596895761e-18,1,51,180,epithelial cell migration,BP,Endo,cells,hypergeometric
GO:0090130,2.64827596895761e-18,1,51,180,tissue migration,BP,Endo,cells,hypergeometric
GO:0090132,2.64827596895761e-18,1,51,180,epithelium migration,BP,Endo,cells,hypergeometric
GO:0048518,3.22537519999264e-18,1,371,3632,positive regulation of biological process,BP,Endo,cells,hypergeometric
GO:0050794,5.37228636829289e-18,1,540,6000,regulation of cellular process,BP,Endo,cells,hypergeometric
GO:0007264,6.32573846458434e-18,1,68,304,small GTPase mediated signal transduction,BP,Endo,cells,hypergeometric
GO:0007015,1.36296165459636e-17,1,66,293,actin filament organization,BP,Endo,cells,hypergeometric
GO:0048519,1.48217159991562e-17,1,337,3224,negative regulation of biological process,BP,Endo,cells,hypergeometric
GO:0002376,2.65562354179244e-17,1,156,1125,immune system process,BP,Endo,cells,hypergeometric
GO:0010646,3.12262811507685e-17,1,236,2008,regulation of cell communication,BP,Endo,cells,hypergeometric
GO:0023051,4.84435275716388e-17,1,236,2015,regulation of signaling,BP,Endo,cells,hypergeometric
GO:1902531,4.99887801049711e-17,1,141,979,regulation of intracellular signal transduction,BP,Endo,cells,hypergeometric
GO:0015629,5.4431472790956e-17,1,68,316,actin cytoskeleton,CC,Endo,cells,hypergeometric
GO:0050789,6.02112516038454e-17,1,552,6234,regulation of biological process,BP,Endo,cells,hypergeometric
GO:0009967,1.1972180631555e-16,1,127,849,positive regulation of signal transduction,BP,Endo,cells,hypergeometric
GO:0065007,1.24493698316758e-16,1,571,6540,biological regulation,BP,Endo,cells,hypergeometric
GO:0051239,2.11004284072374e-16,1,187,1483,regulation of multicellular organismal process,BP,Endo,cells,hypergeometric
GO:0070887,2.79815417085998e-16,1,198,1609,cellular response to chemical stimulus,BP,Endo,cells,hypergeometric
GO:0007275,3.31588147464874e-16,1,323,3107,multicellular organism development,BP,Endo,cells,hypergeometric
GO:0048646,3.59587071511618e-16,1,102,621,anatomical structure formation involved in morphogenesis,BP,Endo,cells,hypergeometric
GO:0032501,4.36528508437864e-16,1,381,3864,multicellular organismal process,BP,Endo,cells,hypergeometric
GO:0010632,5.08924503533495e-16,1,42,142,regulation of epithelial cell migration,BP,Endo,cells,hypergeometric
GO:0015934,1.2555999542261e-15,1,35,103,large ribosomal subunit,CC,Endo,cells,hypergeometric
GO:0050793,1.2940860953665e-15,1,186,1498,regulation of developmental process,BP,Endo,cells,hypergeometric
GO:1902533,1.33467637779655e-15,1,92,541,positive regulation of intracellular signal transduction,BP,Endo,cells,hypergeometric
GO:0030155,1.92388359739038e-15,1,74,387,regulation of cell adhesion,BP,Endo,cells,hypergeometric
GO:0048584,2.17675063893966e-15,1,147,1085,positive regulation of response to stimulus,BP,Endo,cells,hypergeometric
GO:0032879,2.19938028627652e-15,1,209,1765,regulation of localization,BP,Endo,cells,hypergeometric
GO:0009888,2.28941779974499e-15,1,140,1013,tissue development,BP,Endo,cells,hypergeometric
GO:0048513,2.92415075846293e-15,0.999999999999999,216,1850,animal organ development,BP,Endo,cells,hypergeometric
GO:0007265,5.00577064707336e-15,1,53,227,Ras protein signal transduction,BP,Endo,cells,hypergeometric
GO:0097435,5.90348446089804e-15,0.999999999999998,82,464,supramolecular fiber organization,BP,Endo,cells,hypergeometric
GO:1901342,7.93584588008841e-15,0.999999999999999,39,133,regulation of vasculature development,BP,Endo,cells,hypergeometric
GO:0042221,1.35771740136826e-14,0.999999999999993,232,2063,response to chemical,BP,Endo,cells,hypergeometric
GO:0045216,1.69524088239102e-14,0.999999999999997,35,111,cell-cell junction organization,BP,Endo,cells,hypergeometric
GO:0005829,1.72364800445597e-14,0.999999999999991,278,2623,cytosol,CC,Endo,cells,hypergeometric
GO:0045765,1.97823726974391e-14,0.999999999999997,38,130,regulation of angiogenesis,BP,Endo,cells,hypergeometric
GO:0010647,2.31920245293789e-14,0.99999999999999,136,1000,positive regulation of cell communication,BP,Endo,cells,hypergeometric
GO:0007166,2.36545090129564e-14,0.999999999999989,170,1364,cell surface receptor signaling pathway,BP,Endo,cells,hypergeometric
GO:0023056,2.72174341812539e-14,0.999999999999988,136,1002,positive regulation of signaling,BP,Endo,cells,hypergeometric
GO:0032970,2.98072297778472e-14,0.999999999999992,57,267,regulation of actin filament-based process,BP,Endo,cells,hypergeometric
GO:0071310,3.22484785073008e-14,0.999999999999985,162,1281,cellular response to organic substance,BP,Endo,cells,hypergeometric
GO:0050678,6.60397985507175e-14,0.999999999999985,46,189,regulation of epithelial cell proliferation,BP,Endo,cells,hypergeometric
GO:0070848,2.07259388633222e-13,0.999999999999934,70,387,response to growth factor,BP,Endo,cells,hypergeometric
GO:0008284,2.47203159003431e-13,0.999999999999914,80,477,positive regulation of cell population proliferation,BP,Endo,cells,hypergeometric
GO:0022626,1.25780945627299e-38,1,72,84,cytosolic ribosome,CC,Endo,nuclei,goseq
GO:0005737,5.94468442256912e-29,1,700,6910,cytoplasm,CC,Endo,nuclei,goseq
GO:0005198,6.97521365621083e-27,1,109,306,structural molecule activity,MF,Endo,nuclei,goseq
GO:0003735,1.04921893981641e-24,1,78,132,structural constituent of ribosome,MF,Endo,nuclei,goseq
GO:0022625,6.29638799751981e-24,1,41,45,cytosolic large ribosomal subunit,CC,Endo,nuclei,goseq
GO:0044391,9.81870643420931e-24,1,81,152,ribosomal subunit,CC,Endo,nuclei,goseq
GO:0005840,1.07316172479243e-22,1,86,180,ribosome,CC,Endo,nuclei,goseq
GO:0008219,1.06486764779612e-20,1,187,1199,cell death,BP,Endo,nuclei,goseq
GO:0010941,3.58988084627317e-19,1,156,951,regulation of cell death,BP,Endo,nuclei,goseq
GO:0110165,4.38285695280435e-19,1,820,9356,cellular anatomical entity,CC,Endo,nuclei,goseq
GO:0044877,6.09300709826649e-19,1,151,959,protein-containing complex binding,MF,Endo,nuclei,goseq
GO:0005829,8.51240521963806e-19,1,312,2524,cytosol,CC,Endo,nuclei,goseq
GO:0012501,4.08064355312247e-18,1,169,1091,programmed cell death,BP,Endo,nuclei,goseq
GO:0032991,7.36558726542009e-18,1,417,3500,protein-containing complex,CC,Endo,nuclei,goseq
GO:0043209,5.50278342014177e-17,1,55,168,myelin sheath,CC,Endo,nuclei,goseq
GO:0006915,6.17318895594109e-17,1,163,1066,apoptotic process,BP,Endo,nuclei,goseq
GO:0005622,9.61633681303539e-17,1,766,8393,intracellular anatomical structure,CC,Endo,nuclei,goseq
GO:0022627,1.07389834190687e-16,1,31,37,cytosolic small ribosomal subunit,CC,Endo,nuclei,goseq
GO:0043067,2.34157955137429e-16,1,138,849,regulation of programmed cell death,BP,Endo,nuclei,goseq
GO:0030054,3.19962230187922e-16,1,175,1361,cell junction,CC,Endo,nuclei,goseq
GO:0042981,4.76787023761169e-16,1,135,831,regulation of apoptotic process,BP,Endo,nuclei,goseq
GO:0043229,4.24392710919369e-15,1,712,7599,intracellular organelle,CC,Endo,nuclei,goseq
GO:0048523,9.2857467574969e-15,1,312,2834,negative regulation of cellular process,BP,Endo,nuclei,goseq
GO:0009987,1.73824541170937e-14,1,769,8724,cellular process,BP,Endo,nuclei,goseq
GO:2000145,1.76779110976252e-14,1,87,529,regulation of cell motility,BP,Endo,nuclei,goseq
GO:0005515,2.86097571002665e-14,1,512,5348,protein binding,MF,Endo,nuclei,goseq
GO:0060548,3.8177684016139e-14,1,105,605,negative regulation of cell death,BP,Endo,nuclei,goseq
GO:0043226,5.45166156996603e-14,1,717,7746,organelle,CC,Endo,nuclei,goseq
GO:0006518,5.61927002291723e-14,1,120,594,peptide metabolic process,BP,Endo,nuclei,goseq
GO:1901566,9.18852755029207e-14,1,170,1061,organonitrogen compound biosynthetic process,BP,Endo,nuclei,goseq
GO:0015934,1.01398780151832e-13,1,48,92,large ribosomal subunit,CC,Endo,nuclei,goseq
GO:0030334,1.01495220414099e-13,1,83,505,regulation of cell migration,BP,Endo,nuclei,goseq
GO:0016477,1.44149283497884e-13,1,115,821,cell migration,BP,Endo,nuclei,goseq
GO:0051270,2.0017087403582e-13,1,91,585,regulation of cellular component movement,BP,Endo,nuclei,goseq
GO:0048519,3.20466564718052e-13,1,327,3073,negative regulation of biological process,BP,Endo,nuclei,goseq
GO:0040012,4.00289080140535e-13,1,87,558,regulation of locomotion,BP,Endo,nuclei,goseq
GO:0006412,4.73457678030452e-13,1,106,486,translation,BP,Endo,nuclei,goseq
GO:0043043,4.97789996811676e-13,1,107,499,peptide biosynthetic process,BP,Endo,nuclei,goseq
GO:0098800,7.22522758981215e-13,1,47,106,inner mitochondrial membrane protein complex,CC,Endo,nuclei,goseq
GO:0001568,8.46614181969506e-13,1,63,351,blood vessel development,BP,Endo,nuclei,goseq
GO:0002181,1.11746426327731e-12,1,38,80,cytoplasmic translation,BP,Endo,nuclei,goseq
GO:0043604,1.31672483675399e-12,1,113,568,amide biosynthetic process,BP,Endo,nuclei,goseq
GO:0001944,1.63097956495032e-12,1,65,374,vasculature development,BP,Endo,nuclei,goseq
GO:0043603,1.87359208501993e-12,1,129,722,cellular amide metabolic process,BP,Endo,nuclei,goseq
GO:0070161,2.23923211571171e-12,1,61,369,anchoring junction,CC,Endo,nuclei,goseq
GO:0048870,2.28067589664977e-12,1,120,905,cell motility,BP,Endo,nuclei,goseq
GO:0051674,2.28067589664977e-12,1,120,905,localization of cell,BP,Endo,nuclei,goseq
GO:0016020,2.56233783339783e-12,1,439,4491,membrane,CC,Endo,nuclei,goseq
GO:0070887,2.76982348777787e-12,1,188,1537,cellular response to chemical stimulus,BP,Endo,nuclei,goseq
GO:0070469,3.32960795370467e-12,1,39,72,respirasome,CC,Endo,nuclei,goseq
GO:1902531,3.65864378203279e-12,1,126,916,regulation of intracellular signal transduction,BP,Endo,nuclei,goseq
GO:1990904,3.99925858855529e-12,1,117,554,ribonucleoprotein complex,CC,Endo,nuclei,goseq
GO:0015078,5.42209448931768e-12,1,35,73,proton transmembrane transporter activity,MF,Endo,nuclei,goseq
GO:0005844,5.70559063263929e-12,1,32,65,polysome,CC,Endo,nuclei,goseq
GO:0015935,5.86172893435323e-12,1,35,64,small ribosomal subunit,CC,Endo,nuclei,goseq
GO:0042221,6.98027291547787e-12,1,225,1979,response to chemical,BP,Endo,nuclei,goseq
GO:0010942,7.62432012313303e-12,1,71,374,positive regulation of cell death,BP,Endo,nuclei,goseq
GO:0010033,7.77299606202068e-12,1,181,1496,response to organic substance,BP,Endo,nuclei,goseq
GO:0048514,7.81046089746397e-12,1,56,300,blood vessel morphogenesis,BP,Endo,nuclei,goseq
GO:0043069,8.92782526601064e-12,1,89,523,negative regulation of programmed cell death,BP,Endo,nuclei,goseq
GO:2000147,1.2908247322762e-11,1,56,304,positive regulation of cell motility,BP,Endo,nuclei,goseq
GO:0030335,1.30281533526811e-11,1,55,296,positive regulation of cell migration,BP,Endo,nuclei,goseq
GO:0043066,1.32615354323772e-11,1,87,510,negative regulation of apoptotic process,BP,Endo,nuclei,goseq
GO:0071310,1.47556001965236e-11,1,153,1223,cellular response to organic substance,BP,Endo,nuclei,goseq
GO:0001667,1.52729590829257e-11,1,48,246,ameboidal-type cell migration,BP,Endo,nuclei,goseq
GO:0043065,1.59762700285432e-11,1,65,334,positive regulation of apoptotic process,BP,Endo,nuclei,goseq
GO:0009966,1.68099594942907e-11,1,187,1622,regulation of signal transduction,BP,Endo,nuclei,goseq
GO:0048518,1.82250767367047e-11,1,349,3470,positive regulation of biological process,BP,Endo,nuclei,goseq
GO:0050896,2.0945656733293e-11,1,398,4122,response to stimulus,BP,Endo,nuclei,goseq
GO:0043085,2.27828092715409e-11,1,92,632,positive regulation of catalytic activity,BP,Endo,nuclei,goseq
GO:0043068,2.28269541407171e-11,1,65,337,positive regulation of programmed cell death,BP,Endo,nuclei,goseq
GO:0044093,2.30687825511915e-11,1,115,862,positive regulation of molecular function,BP,Endo,nuclei,goseq
GO:0040011,2.60702536761643e-11,1,125,1008,locomotion,BP,Endo,nuclei,goseq
GO:0005911,2.84513083245515e-11,1,51,290,cell-cell junction,CC,Endo,nuclei,goseq
GO:0031966,3.05136915901527e-11,1,97,456,mitochondrial membrane,CC,Endo,nuclei,goseq
GO:0048522,3.21215669262463e-11,1,332,3262,positive regulation of cellular process,BP,Endo,nuclei,goseq
GO:0042788,3.45612224610751e-11,1,23,31,polysomal ribosome,CC,Endo,nuclei,goseq
GO:0005740,4.68105666713482e-11,1,101,486,mitochondrial envelope,CC,Endo,nuclei,goseq
GO:0040017,4.89929067680081e-11,1,56,313,positive regulation of locomotion,BP,Endo,nuclei,goseq
GO:0019899,6.43078825176403e-11,1,178,1521,enzyme binding,MF,Endo,nuclei,goseq
GO:0035239,6.4917361250548e-11,1,70,452,tube morphogenesis,BP,Endo,nuclei,goseq
GO:0051272,6.5505928708627e-11,1,56,316,positive regulation of cellular component movement,BP,Endo,nuclei,goseq
GO:0005743,7.50692911892942e-11,1,81,334,mitochondrial inner membrane,CC,Endo,nuclei,goseq
GO:0032879,7.96225092297872e-11,1,189,1700,regulation of localization,BP,Endo,nuclei,goseq
GO:0071944,9.70047814614945e-11,1,256,2627,cell periphery,CC,Endo,nuclei,goseq
GO:0023051,1.03414434199161e-10,1,208,1917,regulation of signaling,BP,Endo,nuclei,goseq
GO:1902533,1.18130974235032e-10,1,82,506,positive regulation of intracellular signal transduction,BP,Endo,nuclei,goseq
GO:0098803,1.39055984897332e-10,0.999999999978352,35,65,respiratory chain complex,CC,Endo,nuclei,goseq
GO:0048583,1.73731408078048e-10,1,221,2040,regulation of response to stimulus,BP,Endo,nuclei,goseq
GO:0007165,2.02996587829132e-10,1,271,2696,signal transduction,BP,Endo,nuclei,goseq
GO:0010646,2.15993026029939e-10,1,206,1909,regulation of cell communication,BP,Endo,nuclei,goseq
GO:0022610,2.52426111531254e-10,1,88,679,biological adhesion,BP,Endo,nuclei,goseq
GO:0045202,2.94641177896993e-10,1,129,1030,synapse,CC,Endo,nuclei,goseq
GO:0005746,2.98520024827887e-10,0.999999999953737,33,63,mitochondrial respirasome,CC,Endo,nuclei,goseq
GO:0019866,4.44847579753797e-10,1,82,362,organelle inner membrane,CC,Endo,nuclei,goseq
GO:0031090,5.00906559401744e-10,1,197,1547,organelle membrane,CC,Endo,nuclei,goseq
GO:0015453,5.05761343351266e-10,0.999999999946712,26,38,oxidoreduction-driven active transmembrane transporter activity,MF,Endo,nuclei,goseq
GO:0051716,5.50996134819437e-10,1,345,3567,cellular response to stimulus,BP,Endo,nuclei,goseq
GO:0072359,6.87736117035317e-10,1,82,606,circulatory system development,BP,Endo,nuclei,goseq
GO:0050794,8.13238146734152e-10,1,520,5772,regulation of cellular process,BP,Endo,nuclei,goseq
GO:0022626,6.51706226453755e-67,1,72,84,cytosolic ribosome,CC,Endo,nuclei,hypergeometric
GO:0003735,1.71539436250291e-51,1,78,132,structural constituent of ribosome,MF,Endo,nuclei,hypergeometric
GO:0044391,1.20010378528457e-48,1,81,152,ribosomal subunit,CC,Endo,nuclei,hypergeometric
GO:0005840,1.3402068917397e-46,1,86,180,ribosome,CC,Endo,nuclei,hypergeometric
GO:0005198,9.83141816987946e-44,1,109,306,structural molecule activity,MF,Endo,nuclei,hypergeometric
GO:0022625,7.71306437081019e-41,1,41,45,cytosolic large ribosomal subunit,CC,Endo,nuclei,hypergeometric
GO:0005737,2.45491204349386e-29,1,700,6910,cytoplasm,CC,Endo,nuclei,hypergeometric
GO:0022627,1.25604325394171e-28,1,31,37,cytosolic small ribosomal subunit,CC,Endo,nuclei,hypergeometric
GO:0015934,1.38217088535098e-28,1,48,92,large ribosomal subunit,CC,Endo,nuclei,hypergeometric
GO:0070469,3.04307629000751e-24,1,39,72,respirasome,CC,Endo,nuclei,hypergeometric
GO:0098800,4.69190111376403e-24,1,47,106,inner mitochondrial membrane protein complex,CC,Endo,nuclei,hypergeometric
GO:0032991,3.08227366064092e-23,1,417,3500,protein-containing complex,CC,Endo,nuclei,hypergeometric
GO:1990904,3.23797675421444e-23,1,117,554,ribonucleoprotein complex,CC,Endo,nuclei,hypergeometric
GO:0006412,3.43196867164375e-22,1,106,486,translation,BP,Endo,nuclei,hypergeometric
GO:0006518,4.55024718094553e-22,1,120,594,peptide metabolic process,BP,Endo,nuclei,hypergeometric
GO:0015935,4.56438482708553e-22,1,35,64,small ribosomal subunit,CC,Endo,nuclei,hypergeometric
GO:0043043,8.71201313077254e-22,1,107,499,peptide biosynthetic process,BP,Endo,nuclei,hypergeometric
GO:0098803,9.14002223243761e-22,1,35,65,respiratory chain complex,CC,Endo,nuclei,hypergeometric
GO:0002181,5.42955450443554e-21,1,38,80,cytoplasmic translation,BP,Endo,nuclei,hypergeometric
GO:0008219,2.05126070315212e-20,1,187,1199,cell death,BP,Endo,nuclei,hypergeometric
GO:0043209,2.32605766023249e-20,1,55,168,myelin sheath,CC,Endo,nuclei,hypergeometric
GO:0015453,3.05702164311341e-20,1,26,38,oxidoreduction-driven active transmembrane transporter activity,MF,Endo,nuclei,hypergeometric
GO:0043604,3.11556156971606e-20,1,113,568,amide biosynthetic process,BP,Endo,nuclei,hypergeometric
GO:0005746,4.28973691163288e-20,1,33,63,mitochondrial respirasome,CC,Endo,nuclei,hypergeometric
GO:0005743,4.47085809504291e-20,1,81,334,mitochondrial inner membrane,CC,Endo,nuclei,hypergeometric
GO:1901566,1.0729627142529e-19,1,170,1061,organonitrogen compound biosynthetic process,BP,Endo,nuclei,hypergeometric
GO:0015078,1.33731155425301e-19,1,35,73,proton transmembrane transporter activity,MF,Endo,nuclei,hypergeometric
GO:0005740,1.53206801641495e-19,1,101,486,mitochondrial envelope,CC,Endo,nuclei,hypergeometric
GO:0031966,1.57188159195636e-19,1,97,456,mitochondrial membrane,CC,Endo,nuclei,hypergeometric
GO:0042788,2.49095419325823e-19,1,23,31,polysomal ribosome,CC,Endo,nuclei,hypergeometric
GO:0010941,5.05336047273966e-19,1,156,951,regulation of cell death,BP,Endo,nuclei,hypergeometric
GO:0043603,7.77393811268549e-19,1,129,722,cellular amide metabolic process,BP,Endo,nuclei,hypergeometric
GO:0005844,1.81616610029095e-18,1,32,65,polysome,CC,Endo,nuclei,hypergeometric
GO:0019866,2.36875087822539e-18,1,82,362,organelle inner membrane,CC,Endo,nuclei,hypergeometric
GO:0098798,3.83692604636938e-18,1,60,216,mitochondrial protein-containing complex,CC,Endo,nuclei,hypergeometric
GO:0005829,4.00886491948488e-18,1,312,2524,cytosol,CC,Endo,nuclei,hypergeometric
GO:0012501,4.80886894293563e-18,1,169,1091,programmed cell death,BP,Endo,nuclei,hypergeometric
GO:0005622,2.58879592477204e-17,1,766,8393,intracellular anatomical structure,CC,Endo,nuclei,hypergeometric
GO:0110165,3.46397406448364e-17,1,820,9356,cellular anatomical entity,CC,Endo,nuclei,hypergeometric
GO:0009055,6.97539403138859e-17,1,26,47,electron transfer activity,MF,Endo,nuclei,hypergeometric
GO:0006915,7.86782924452406e-17,1,163,1066,apoptotic process,BP,Endo,nuclei,hypergeometric
GO:0044877,1.00293299446216e-16,1,151,959,protein-containing complex binding,MF,Endo,nuclei,hypergeometric
GO:0046034,1.48551043449332e-16,1,52,181,ATP metabolic process,BP,Endo,nuclei,hypergeometric
GO:0043229,1.81812355645812e-16,1,712,7599,intracellular organelle,CC,Endo,nuclei,hypergeometric
GO:0043067,1.87418609009001e-16,1,138,849,regulation of programmed cell death,BP,Endo,nuclei,hypergeometric
GO:0042981,4.46286114679297e-16,1,135,831,regulation of apoptotic process,BP,Endo,nuclei,hypergeometric
GO:0006119,4.5730064065388e-16,1,34,85,oxidative phosphorylation,BP,Endo,nuclei,hypergeometric
GO:0043226,7.03741309410124e-15,0.999999999999997,717,7746,organelle,CC,Endo,nuclei,hypergeometric
GO:0015399,1.60638172298474e-14,0.999999999999997,37,110,primary active transmembrane transporter activity,MF,Endo,nuclei,hypergeometric
GO:0060548,1.62737291597323e-14,0.999999999999994,105,605,negative regulation of cell death,BP,Endo,nuclei,hypergeometric
GO:0009060,1.15968596858505e-13,0.999999999999979,38,122,aerobic respiration,BP,Endo,nuclei,hypergeometric
GO:0006091,1.22388992146497e-13,0.999999999999965,62,280,generation of precursor metabolites and energy,BP,Endo,nuclei,hypergeometric
GO:0019843,1.3955178142273e-13,0.999999999999985,26,60,rRNA binding,MF,Endo,nuclei,hypergeometric
GO:0070069,1.40444376895959e-13,0.999999999999996,16,22,cytochrome complex,CC,Endo,nuclei,hypergeometric
GO:0005739,2.73626065182695e-13,0.999999999999865,175,1281,mitochondrion,CC,Endo,nuclei,hypergeometric
GO:0031967,6.92550070035978e-13,0.999999999999701,119,764,organelle envelope,CC,Endo,nuclei,hypergeometric
GO:0031975,6.92550070035978e-13,0.999999999999701,119,764,envelope,CC,Endo,nuclei,hypergeometric
GO:0005753,1.0613501948538e-12,0.999999999999975,14,18,mitochondrial proton-transporting ATP synthase complex,CC,Endo,nuclei,hypergeometric
GO:0045333,2.53295174620271e-12,0.999999999999438,41,152,cellular respiration,BP,Endo,nuclei,hypergeometric
GO:0045259,3.73325925697856e-12,0.999999999999893,14,19,proton-transporting ATP synthase complex,CC,Endo,nuclei,hypergeometric
GO:0015980,3.75277950490417e-12,0.999999999999009,49,207,energy derivation by oxidation of organic compounds,BP,Endo,nuclei,hypergeometric
GO:0031090,5.60250452108844e-12,0.999999999997021,197,1547,organelle membrane,CC,Endo,nuclei,hypergeometric
GO:0010942,5.71203457022705e-12,0.999999999998016,71,374,positive regulation of cell death,BP,Endo,nuclei,hypergeometric
GO:0043069,6.24132360503022e-12,0.999999999997538,89,523,negative regulation of programmed cell death,BP,Endo,nuclei,hypergeometric
GO:1902600,6.87039266337769e-12,0.999999999999123,25,64,proton transmembrane transport,BP,Endo,nuclei,hypergeometric
GO:0098796,8.72732307829096e-12,0.999999999996089,116,765,membrane protein complex,CC,Endo,nuclei,hypergeometric
GO:0043066,9.63065338126988e-12,0.999999999996208,87,510,negative regulation of apoptotic process,BP,Endo,nuclei,hypergeometric
GO:0004129,1.0291231884571e-11,0.999999999999926,11,12,cytochrome-c oxidase activity,MF,Endo,nuclei,hypergeometric
GO:0005747,1.09583084276234e-11,0.999999999999019,20,42,mitochondrial respiratory chain complex I,CC,Endo,nuclei,hypergeometric
GO:0030964,1.09583084276234e-11,0.999999999999019,20,42,NADH dehydrogenase complex,CC,Endo,nuclei,hypergeometric
GO:0045271,1.09583084276234e-11,0.999999999999019,20,42,respiratory chain complex I,CC,Endo,nuclei,hypergeometric
GO:0043065,1.52390692796109e-11,0.999999999994854,65,334,positive regulation of apoptotic process,BP,Endo,nuclei,hypergeometric
GO:0043068,2.29540606552373e-11,0.999999999992161,65,337,positive regulation of programmed cell death,BP,Endo,nuclei,hypergeometric
GO:1990204,2.40321884026525e-11,0.999999999996133,28,83,oxidoreductase complex,CC,Endo,nuclei,hypergeometric
GO:0019646,5.3463931418938e-11,0.999999999994562,20,45,aerobic electron transport chain,BP,Endo,nuclei,hypergeometric
GO:0030054,5.71421221545041e-11,0.999999999969576,175,1361,cell junction,CC,Endo,nuclei,hypergeometric
GO:0016675,6.19888631312047e-11,0.999999999999108,11,13,"oxidoreductase activity, acting on a heme group of donors",MF,Endo,nuclei,hypergeometric
GO:0045277,6.19888631312047e-11,0.999999999999108,11,13,respiratory chain complex IV,CC,Endo,nuclei,hypergeometric
GO:0048523,6.26255857942268e-11,0.999999999962261,312,2834,negative regulation of cellular process,BP,Endo,nuclei,hypergeometric
GO:0009987,6.82756464180524e-11,0.999999999967648,769,8724,cellular process,BP,Endo,nuclei,hypergeometric
GO:2000145,7.10701465163039e-11,0.999999999970721,87,529,regulation of cell motility,BP,Endo,nuclei,hypergeometric
GO:0030334,2.08938830654239e-10,0.999999999913678,83,505,regulation of cell migration,BP,Endo,nuclei,hypergeometric
GO:0016469,2.29776768380864e-10,0.999999999978268,18,39,proton-transporting two-sector ATPase complex,CC,Endo,nuclei,hypergeometric
GO:0006754,3.86453068191837e-10,0.999999999961716,18,40,ATP biosynthetic process,BP,Endo,nuclei,hypergeometric
GO:0009206,4.81215963973881e-10,0.999999999946536,19,45,purine ribonucleoside triphosphate biosynthetic process,BP,Endo,nuclei,hypergeometric
GO:0051270,5.23126340421019e-10,0.999999999769664,91,585,regulation of cellular component movement,BP,Endo,nuclei,hypergeometric
GO:1902533,5.49608664972679e-10,0.999999999768848,82,506,positive regulation of intracellular signal transduction,BP,Endo,nuclei,hypergeometric
GO:0042773,5.54264817309284e-10,0.999999999926935,21,55,ATP synthesis coupled electron transport,BP,Endo,nuclei,hypergeometric
GO:0070887,6.86783704738455e-10,0.999999999612923,188,1537,cellular response to chemical stimulus,BP,Endo,nuclei,hypergeometric
GO:0009145,7.58294145166717e-10,0.999999999912527,19,46,purine nucleoside triphosphate biosynthetic process,BP,Endo,nuclei,hypergeometric
GO:1902531,7.71917544585248e-10,0.999999999611729,126,916,regulation of intracellular signal transduction,BP,Endo,nuclei,hypergeometric
GO:0043228,1.04289276032131e-09,0.999999999350787,308,2854,non-membrane-bounded organelle,CC,Endo,nuclei,hypergeometric
GO:0043232,1.04289276032131e-09,0.999999999350787,308,2854,intracellular non-membrane-bounded organelle,CC,Endo,nuclei,hypergeometric
GO:0001568,1.04300419375831e-09,0.999999999610014,63,351,blood vessel development,BP,Endo,nuclei,hypergeometric
GO:0048519,1.15190720015209e-09,0.999999999276621,327,3073,negative regulation of biological process,BP,Endo,nuclei,hypergeometric
GO:0040012,1.15898989969169e-09,0.999999999490131,87,558,regulation of locomotion,BP,Endo,nuclei,hypergeometric
GO:0009201,1.17729887642955e-09,0.999999999859187,19,47,ribonucleoside triphosphate biosynthetic process,BP,Endo,nuclei,hypergeometric
GO:0065003,1.61380603985726e-09,0.999999999172392,128,946,protein-containing complex assembly,BP,Endo,nuclei,hypergeometric
GO:0016477,1.63506356471127e-09,0.999999999191114,115,821,cell migration,BP,Endo,nuclei,hypergeometric
GO:0044271,1.7164520105557e-09,0.999999998938047,282,2573,cellular nitrogen compound biosynthetic process,BP,Endo,nuclei,hypergeometric
GO:0098794,0.0000012488959906938,0.999999636508774,28,532,postsynapse,CC,L2/3 IT,cells,goseq
GO:0045202,0.00000393223099412211,0.99999857066375,39,1067,synapse,CC,L2/3 IT,cells,goseq
GO:0030054,0.0000208623579501173,0.999991449393414,44,1411,cell junction,CC,L2/3 IT,cells,goseq
GO:0036477,0.0000843874723618172,0.999967892295046,29,817,somatodendritic compartment,CC,L2/3 IT,cells,goseq
GO:0030425,0.0000998512520866702,0.999964873850097,24,595,dendrite,CC,L2/3 IT,cells,goseq
GO:0048731,0.000110563055960658,0.999948133954636,60,2779,system development,BP,L2/3 IT,cells,goseq
GO:0097447,0.000113137719072809,0.999959850669418,24,598,dendritic tree,CC,L2/3 IT,cells,goseq
GO:0099173,0.000116009906817484,0.999972664167621,13,180,postsynapse organization,BP,L2/3 IT,cells,goseq
GO:0030049,0.000160819559944344,0.999999303052613,2,6,muscle filament sliding,BP,L2/3 IT,cells,goseq
GO:0005576,0.000185460331715587,0.999936113298705,21,678,extracellular region,CC,L2/3 IT,cells,goseq
GO:0098978,0.000188777935342525,0.99994300396369,17,294,glutamatergic synapse,CC,L2/3 IT,cells,goseq
GO:0007275,0.000205351747464035,0.999900598561054,63,3107,multicellular organism development,BP,L2/3 IT,cells,goseq
GO:0030003,0.000218824276151988,0.99994094849508,14,345,cellular cation homeostasis,BP,L2/3 IT,cells,goseq
GO:0034330,0.000221715604373258,0.99991757575321,24,555,cell junction organization,BP,L2/3 IT,cells,goseq
GO:0098984,0.000222858113701221,0.999929207775966,18,327,neuron to neuron synapse,CC,L2/3 IT,cells,goseq
GO:0050808,0.000235242603540766,0.999920105709217,20,403,synapse organization,BP,L2/3 IT,cells,goseq
GO:0002026,0.00025692951857175,0.999987083335709,4,20,regulation of the force of heart contraction,BP,L2/3 IT,cells,goseq
GO:0043005,0.000272130515048091,0.999880702671806,35,1138,neuron projection,CC,L2/3 IT,cells,goseq
GO:0006873,0.000276235389130115,0.999923679259559,14,349,cellular ion homeostasis,BP,L2/3 IT,cells,goseq
GO:0006875,0.000281945857491555,0.999926177012485,13,303,cellular metal ion homeostasis,BP,L2/3 IT,cells,goseq
GO:0055080,0.000282830688461912,0.999917753520899,15,393,cation homeostasis,BP,L2/3 IT,cells,goseq
GO:0005509,0.000296338985868865,0.999913882977494,15,292,calcium ion binding,MF,L2/3 IT,cells,goseq
GO:0098771,0.000298528225910585,0.99991272882732,15,395,inorganic ion homeostasis,BP,L2/3 IT,cells,goseq
GO:0099572,0.000333744413898578,0.999893872412738,17,312,postsynaptic specialization,CC,L2/3 IT,cells,goseq
GO:0055065,0.000338061684899248,0.999904678965746,14,347,metal ion homeostasis,BP,L2/3 IT,cells,goseq
GO:0032279,0.000339241177581108,0.999891994673537,17,308,asymmetric synapse,CC,L2/3 IT,cells,goseq
GO:0098802,0.000343849165897787,0.999942225476284,8,92,plasma membrane signaling receptor complex,CC,L2/3 IT,cells,goseq
GO:0050896,0.000354231816305968,0.999825003990397,72,4269,response to stimulus,BP,L2/3 IT,cells,goseq
GO:0120025,0.000368693049081168,0.999827831000308,41,1574,plasma membrane bounded cell projection,CC,L2/3 IT,cells,goseq
GO:0048856,0.000393043737322226,0.999803642662391,65,3345,anatomical structure development,BP,L2/3 IT,cells,goseq
GO:0008217,0.000428941569839132,0.99993575432705,7,89,regulation of blood pressure,BP,L2/3 IT,cells,goseq
GO:0006936,0.000431971733584939,0.999905069843003,10,165,muscle contraction,BP,L2/3 IT,cells,goseq
GO:0099536,0.000481226180569886,0.999814037769385,23,584,synaptic signaling,BP,L2/3 IT,cells,goseq
GO:0031226,0.000502843972923039,0.999797759260842,25,645,intrinsic component of plasma membrane,CC,L2/3 IT,cells,goseq
GO:0033275,0.00051623397058518,0.999995747213335,2,7,actin-myosin filament sliding,BP,L2/3 IT,cells,goseq
GO:0003056,0.000576442268691579,0.999984961917512,3,7,regulation of vascular associated smooth muscle contraction,BP,L2/3 IT,cells,goseq
GO:0003044,0.000580561690219814,0.999981260928305,3,13,regulation of systemic arterial blood pressure mediated by a chemical signal,BP,L2/3 IT,cells,goseq
GO:0032501,0.000611460547647693,0.999689247326008,71,3864,multicellular organismal process,BP,L2/3 IT,cells,goseq
GO:0014069,0.000618448147238863,0.999799155468239,16,299,postsynaptic density,CC,L2/3 IT,cells,goseq
GO:0050807,0.000695262547702621,0.999800696156902,13,218,regulation of synapse organization,BP,L2/3 IT,cells,goseq
GO:0016021,0.000705945177108239,0.99964644604714,48,2441,integral component of membrane,CC,L2/3 IT,cells,goseq
GO:0015662,0.000714088305162323,0.999973671344095,3,19,P-type ion transporter activity,MF,L2/3 IT,cells,goseq
GO:0140358,0.000714088305162323,0.999973671344095,3,19,P-type transmembrane transporter activity,MF,L2/3 IT,cells,goseq
GO:0099537,0.000732242462666029,0.999713457178853,22,562,trans-synaptic signaling,BP,L2/3 IT,cells,goseq
GO:0099634,0.000738959291245975,0.99986226557206,8,71,postsynaptic specialization membrane,CC,L2/3 IT,cells,goseq
GO:0050801,0.000748653651758243,0.999760164715831,15,426,ion homeostasis,BP,L2/3 IT,cells,goseq
GO:0050803,0.000755240040623022,0.999781397003535,13,223,regulation of synapse structure or activity,BP,L2/3 IT,cells,goseq
GO:0045211,0.000853432753087357,0.999737599273127,14,218,postsynaptic membrane,CC,L2/3 IT,cells,goseq
GO:0023052,0.000870601165861177,0.999547937298008,60,3134,signaling,BP,L2/3 IT,cells,goseq
GO:0031224,0.000998443891532788,0.999488598547721,49,2512,intrinsic component of membrane,CC,L2/3 IT,cells,goseq
GO:0098948,0.0010144857789488,0.999828631704887,7,55,intrinsic component of postsynaptic specialization membrane,CC,L2/3 IT,cells,goseq
GO:0042995,0.00103052061375715,0.999486476334229,42,1730,cell projection,CC,L2/3 IT,cells,goseq
GO:0019725,0.00103906063243927,0.999642306560808,16,510,cellular homeostasis,BP,L2/3 IT,cells,goseq
GO:0099175,0.0011056225225916,0.999776846452897,8,99,regulation of postsynapse organization,BP,L2/3 IT,cells,goseq
GO:0098839,0.00114379931980321,0.999802702613214,7,55,postsynaptic density membrane,CC,L2/3 IT,cells,goseq
GO:0003012,0.00122436424032512,0.999665641576743,11,235,muscle system process,BP,L2/3 IT,cells,goseq
GO:0032502,0.00123015845105352,0.9993488453826,66,3605,developmental process,BP,L2/3 IT,cells,goseq
GO:0007268,0.00124735999985462,0.999500481005869,21,553,chemical synaptic transmission,BP,L2/3 IT,cells,goseq
GO:0098916,0.00124735999985462,0.999500481005869,21,553,anterograde trans-synaptic signaling,BP,L2/3 IT,cells,goseq
GO:0007267,0.00126430612881982,0.999423960052312,29,1014,cell-cell signaling,BP,L2/3 IT,cells,goseq
GO:0055082,0.00127021043728879,0.999570270035577,15,454,cellular chemical homeostasis,BP,L2/3 IT,cells,goseq
GO:0006937,0.00127651424386555,0.999769526703286,7,89,regulation of muscle contraction,BP,L2/3 IT,cells,goseq
GO:0065008,0.00143559531624928,0.999254416889054,47,2329,regulation of biological quality,BP,L2/3 IT,cells,goseq
GO:0055074,0.00150264536787602,0.999578692424865,11,240,calcium ion homeostasis,BP,L2/3 IT,cells,goseq
GO:0099146,0.00152062815259125,0.999771270375257,6,40,intrinsic component of postsynaptic density membrane,CC,L2/3 IT,cells,goseq
GO:0022603,0.00154455685683979,0.999382725636421,20,605,regulation of anatomical structure morphogenesis,BP,L2/3 IT,cells,goseq
GO:0007416,0.00162762891648623,0.999544011917561,11,153,synapse assembly,BP,L2/3 IT,cells,goseq
GO:0005102,0.00182976353518026,0.9992565463032,20,721,signaling receptor binding,MF,L2/3 IT,cells,goseq
GO:0002763,0.00186426943522671,0.999900157979414,3,28,positive regulation of myeloid leukocyte differentiation,BP,L2/3 IT,cells,goseq
GO:0007154,0.00191219576003626,0.998964897773709,59,3169,cell communication,BP,L2/3 IT,cells,goseq
GO:0043197,0.00195802247237433,0.999472760486583,10,177,dendritic spine,CC,L2/3 IT,cells,goseq
GO:2000026,0.00203592895882285,0.999130714869319,22,792,regulation of multicellular organismal development,BP,L2/3 IT,cells,goseq
GO:0019829,0.00205182920713397,0.999885008402525,3,33,ATPase-coupled cation transmembrane transporter activity,MF,L2/3 IT,cells,goseq
GO:0034329,0.00217108991363928,0.999228045053312,15,295,cell junction assembly,BP,L2/3 IT,cells,goseq
GO:0003231,0.00233337460611278,0.999600849112425,6,80,cardiac ventricle development,BP,L2/3 IT,cells,goseq
GO:0006940,0.00243521779460189,0.999761323670297,4,34,regulation of smooth muscle contraction,BP,L2/3 IT,cells,goseq
GO:0097060,0.00246313311952536,0.999081450373657,16,317,synaptic membrane,CC,L2/3 IT,cells,goseq
GO:0072507,0.00250777419157747,0.999247642139037,11,264,divalent inorganic cation homeostasis,BP,L2/3 IT,cells,goseq
GO:0014829,0.00252355294629221,0.999861783182835,3,14,vascular associated smooth muscle contraction,BP,L2/3 IT,cells,goseq
GO:0044309,0.00261198228251134,0.999267514365354,10,182,neuron spine,CC,L2/3 IT,cells,goseq
GO:0045765,0.00262104180222602,0.999455777304015,7,130,regulation of angiogenesis,BP,L2/3 IT,cells,goseq
GO:0005887,0.00279490164768647,0.998776973185786,22,606,integral component of plasma membrane,CC,L2/3 IT,cells,goseq
GO:1901342,0.00283164230606559,0.999403482323407,7,133,regulation of vasculature development,BP,L2/3 IT,cells,goseq
GO:0005886,0.00296670093991079,0.998364406554922,54,2513,plasma membrane,CC,L2/3 IT,cells,goseq
GO:0044057,0.00296681768451719,0.998944684739648,14,361,regulation of system process,BP,L2/3 IT,cells,goseq
GO:0010770,0.00299431350062119,0.999460141313751,6,85,positive regulation of cell morphogenesis involved in differentiation,BP,L2/3 IT,cells,goseq
GO:0071944,0.0030271167847814,0.998321980355848,57,2702,cell periphery,CC,L2/3 IT,cells,goseq
GO:0048306,0.00309374955696152,0.999667025635573,4,53,calcium-dependent protein binding,MF,L2/3 IT,cells,goseq
GO:0003008,0.00311494323778151,0.998500594667616,28,979,system process,BP,L2/3 IT,cells,goseq
GO:0003062,0.0031557527975604,0.9999651801967,2,3,regulation of heart rate by chemical signal,BP,L2/3 IT,cells,goseq
GO:0043235,0.00326629816848916,0.998990617361554,11,202,receptor complex,CC,L2/3 IT,cells,goseq
GO:1903522,0.00334412940653561,0.999183988629392,8,141,regulation of blood circulation,BP,L2/3 IT,cells,goseq
GO:0045130,0.00335375410388678,1,1,1,keratan sulfotransferase activity,MF,L2/3 IT,cells,goseq
GO:0008029,0.00335493785655915,1,1,1,pentraxin receptor activity,MF,L2/3 IT,cells,goseq
GO:0005859,0.00335535491860047,1,1,1,muscle myosin complex,CC,L2/3 IT,cells,goseq
GO:0014724,0.00335535491860047,1,1,1,regulation of twitch skeletal muscle contraction,BP,L2/3 IT,cells,goseq
GO:0014728,0.00335535491860047,1,1,1,regulation of the force of skeletal muscle contraction,BP,L2/3 IT,cells,goseq
GO:0014862,0.00335535491860047,1,1,1,regulation of skeletal muscle contraction by chemo-mechanical energy conversion,BP,L2/3 IT,cells,goseq
GO:0031444,0.00335535491860047,1,1,1,slow-twitch skeletal muscle fiber contraction,BP,L2/3 IT,cells,goseq
GO:0031449,0.00335535491860047,1,1,1,regulation of slow-twitch skeletal muscle fiber contraction,BP,L2/3 IT,cells,goseq
GO:0098794,1.34567813364262e-12,0.999999999999799,28,532,postsynapse,CC,L2/3 IT,cells,hypergeometric
GO:0045202,2.21025863584612e-12,0.99999999999955,39,1067,synapse,CC,L2/3 IT,cells,hypergeometric
GO:0030054,1.15261659940608e-11,0.999999999997315,44,1411,cell junction,CC,L2/3 IT,cells,hypergeometric
GO:0048731,1.85784850490847e-09,0.999999999424314,60,2779,system development,BP,L2/3 IT,cells,hypergeometric
GO:0034330,3.83120855387646e-09,0.999999999269115,24,555,cell junction organization,BP,L2/3 IT,cells,hypergeometric
GO:0043005,4.83962113197547e-09,0.999999998759359,35,1138,neuron projection,CC,L2/3 IT,cells,hypergeometric
GO:0036477,6.3130576987774e-09,0.999999998556633,29,817,somatodendritic compartment,CC,L2/3 IT,cells,hypergeometric
GO:0007275,6.98457666913841e-09,0.999999997723769,63,3107,multicellular organism development,BP,L2/3 IT,cells,hypergeometric
GO:0050808,9.33673330653046e-09,0.999999998426709,20,403,synapse organization,BP,L2/3 IT,cells,hypergeometric
GO:0098984,1.13792293770839e-08,0.999999998266289,18,327,neuron to neuron synapse,CC,L2/3 IT,cells,hypergeometric
GO:0098978,1.4632886834019e-08,0.999999997875189,17,294,glutamatergic synapse,CC,L2/3 IT,cells,hypergeometric
GO:0030425,1.49374164685262e-08,0.999999996926906,24,595,dendrite,CC,L2/3 IT,cells,hypergeometric
GO:0031226,1.56790354134578e-08,0.999999996653335,25,645,intrinsic component of plasma membrane,CC,L2/3 IT,cells,hypergeometric
GO:0097447,1.6463238389783e-08,0.999999996594473,24,598,dendritic tree,CC,L2/3 IT,cells,hypergeometric
GO:0071944,1.74807491630873e-08,0.999999994223228,57,2702,cell periphery,CC,L2/3 IT,cells,hypergeometric
GO:0048856,1.9066416833443e-08,0.999999993559016,65,3345,anatomical structure development,BP,L2/3 IT,cells,hypergeometric
GO:0120025,1.92372170566177e-08,0.999999994313281,41,1574,plasma membrane bounded cell projection,CC,L2/3 IT,cells,hypergeometric
GO:0032501,2.17503431616018e-08,0.999999992619602,71,3864,multicellular organismal process,BP,L2/3 IT,cells,hypergeometric
GO:0032279,2.91274414260787e-08,0.999999995553437,17,308,asymmetric synapse,CC,L2/3 IT,cells,hypergeometric
GO:0005886,3.03765085174909e-08,0.999999989894789,54,2513,plasma membrane,CC,L2/3 IT,cells,hypergeometric
GO:0099572,3.52120915492896e-08,0.999999994549538,17,312,postsynaptic specialization,CC,L2/3 IT,cells,hypergeometric
GO:0099536,4.89504698915305e-08,0.999999989600902,23,584,synaptic signaling,BP,L2/3 IT,cells,hypergeometric
GO:0099173,6.32372007168194e-08,0.99999999266891,13,180,postsynapse organization,BP,L2/3 IT,cells,hypergeometric
GO:0045211,8.35563359315448e-08,0.999999989033562,14,218,postsynaptic membrane,CC,L2/3 IT,cells,hypergeometric
GO:0042995,9.31742206164038e-08,0.99999997031107,42,1730,cell projection,CC,L2/3 IT,cells,hypergeometric
GO:0099537,1.11893486960775e-07,0.999999975932574,22,562,trans-synaptic signaling,BP,L2/3 IT,cells,hypergeometric
GO:0014069,1.18585914573161e-07,0.99999998120439,16,299,postsynaptic density,CC,L2/3 IT,cells,hypergeometric
GO:0032502,1.67220062858964e-07,0.999999939121963,66,3605,developmental process,BP,L2/3 IT,cells,hypergeometric
GO:0023052,2.29430870241689e-07,0.999999916198673,60,3134,signaling,BP,L2/3 IT,cells,hypergeometric
GO:0097060,2.63460425385839e-07,0.999999955549256,16,317,synaptic membrane,CC,L2/3 IT,cells,hypergeometric
GO:0007268,3.77111531286155e-07,0.999999915730574,21,553,chemical synaptic transmission,BP,L2/3 IT,cells,hypergeometric
GO:0098916,3.77111531286155e-07,0.999999915730574,21,553,anterograde trans-synaptic signaling,BP,L2/3 IT,cells,hypergeometric
GO:0005887,4.12405503316988e-07,0.999999903790526,22,606,integral component of plasma membrane,CC,L2/3 IT,cells,hypergeometric
GO:0005509,5.14825053258492e-07,0.999999914452742,15,292,calcium ion binding,MF,L2/3 IT,cells,hypergeometric
GO:0034329,5.86431717573257e-07,0.999999901486932,15,295,cell junction assembly,BP,L2/3 IT,cells,hypergeometric
GO:0050807,5.86511678870356e-07,0.999999916443664,13,218,regulation of synapse organization,BP,L2/3 IT,cells,hypergeometric
GO:0007267,6.93796854216712e-07,0.999999798611377,29,1014,cell-cell signaling,BP,L2/3 IT,cells,hypergeometric
GO:0007416,7.24767991339954e-07,0.999999915356098,11,153,synapse assembly,BP,L2/3 IT,cells,hypergeometric
GO:0050803,7.59269554966086e-07,0.999999889178999,13,223,regulation of synapse structure or activity,BP,L2/3 IT,cells,hypergeometric
GO:0050896,7.79131759848446e-07,0.999999701367453,72,4269,response to stimulus,BP,L2/3 IT,cells,hypergeometric
GO:0099634,8.5882196298399e-07,0.999999939261517,8,71,postsynaptic specialization membrane,CC,L2/3 IT,cells,hypergeometric
GO:0007155,8.95108243621375e-07,0.999999773356037,23,687,cell adhesion,BP,L2/3 IT,cells,hypergeometric
GO:0007154,9.13304428110554e-07,0.999999649590532,59,3169,cell communication,BP,L2/3 IT,cells,hypergeometric
GO:0000902,9.40624118135059e-07,0.9999997469072,25,798,cell morphogenesis,BP,L2/3 IT,cells,hypergeometric
GO:0022610,9.41459784606501e-07,0.999999760869913,23,689,biological adhesion,BP,L2/3 IT,cells,hypergeometric
GO:0003008,0.00000113811435506687,0.999999667592016,28,979,system process,BP,L2/3 IT,cells,hypergeometric
GO:0098839,0.00000185558603112877,0.999999886594339,7,55,postsynaptic density membrane,CC,L2/3 IT,cells,hypergeometric
GO:0098948,0.00000185558603112877,0.999999886594339,7,55,intrinsic component of postsynaptic specialization membrane,CC,L2/3 IT,cells,hypergeometric
GO:0009653,0.00000192904794156668,0.999999326145948,38,1649,anatomical structure morphogenesis,BP,L2/3 IT,cells,hypergeometric
GO:0065008,0.00000303314834897428,0.999998836305516,47,2329,regulation of biological quality,BP,L2/3 IT,cells,hypergeometric
GO:0099146,0.00000390353821376849,0.999999805239223,6,40,intrinsic component of postsynaptic density membrane,CC,L2/3 IT,cells,hypergeometric
GO:0031224,0.00000442097915811187,0.999998256974884,49,2512,intrinsic component of membrane,CC,L2/3 IT,cells,hypergeometric
GO:0016021,0.00000472775236033279,0.999998140393031,48,2441,integral component of membrane,CC,L2/3 IT,cells,hypergeometric
GO:0098742,0.00000588101995842132,0.999999340308909,9,121,cell-cell adhesion via plasma-membrane adhesion molecules,BP,L2/3 IT,cells,hypergeometric
GO:0098802,0.00000622812082913657,0.999999413257826,8,92,plasma membrane signaling receptor complex,CC,L2/3 IT,cells,hypergeometric
GO:0022603,0.00000625418813115969,0.999998370813737,20,605,regulation of anatomical structure morphogenesis,BP,L2/3 IT,cells,hypergeometric
GO:0050804,0.00000816613927020847,0.999998179949955,16,412,modulation of chemical synaptic transmission,BP,L2/3 IT,cells,hypergeometric
GO:0099177,0.0000084194318328246,0.99999811868244,16,413,regulation of trans-synaptic signaling,BP,L2/3 IT,cells,hypergeometric
GO:0005576,0.00000971816729889158,0.999997297764202,21,678,extracellular region,CC,L2/3 IT,cells,hypergeometric
GO:0099175,0.0000107610121175101,0.99999890210962,8,99,regulation of postsynapse organization,BP,L2/3 IT,cells,hypergeometric
GO:0043235,0.0000108452120354866,0.999998295927487,11,202,receptor complex,CC,L2/3 IT,cells,hypergeometric
GO:0006936,0.000010952635150428,0.999998465881779,10,165,muscle contraction,BP,L2/3 IT,cells,hypergeometric
GO:0007399,0.0000124564543581651,0.999995332563113,36,1640,nervous system development,BP,L2/3 IT,cells,hypergeometric
GO:0023051,0.0000155780455407812,0.999993818679727,41,2015,regulation of signaling,BP,L2/3 IT,cells,hypergeometric
GO:0048468,0.0000168431220268503,0.999993809521737,33,1455,cell development,BP,L2/3 IT,cells,hypergeometric
GO:0030003,0.0000193424618284614,0.999995864314514,14,345,cellular cation homeostasis,BP,L2/3 IT,cells,hypergeometric
GO:0055080,0.0000196994648075108,0.999995516549949,15,393,cation homeostasis,BP,L2/3 IT,cells,hypergeometric
GO:0098936,0.0000197017032319945,0.999998222101647,7,78,intrinsic component of postsynaptic membrane,CC,L2/3 IT,cells,hypergeometric
GO:0043197,0.0000202242691093474,0.999996948346011,10,177,dendritic spine,CC,L2/3 IT,cells,hypergeometric
GO:0099240,0.0000204187366313952,0.999997711782368,8,108,intrinsic component of synaptic membrane,CC,L2/3 IT,cells,hypergeometric
GO:0055065,0.0000206307458104742,0.999995561971368,14,347,metal ion homeostasis,BP,L2/3 IT,cells,hypergeometric
GO:0099060,0.0000208345054305793,0.999998565266565,6,53,integral component of postsynaptic specialization membrane,CC,L2/3 IT,cells,hypergeometric
GO:0098771,0.0000209081280635582,0.999995215975465,15,395,inorganic ion homeostasis,BP,L2/3 IT,cells,hypergeometric
GO:0120039,0.0000210641585049425,0.999994431704398,18,548,plasma membrane bounded cell projection morphogenesis,BP,L2/3 IT,cells,hypergeometric
GO:0006875,0.0000218688860395295,0.999995584023148,13,303,cellular metal ion homeostasis,BP,L2/3 IT,cells,hypergeometric
GO:0006873,0.0000219941830455628,0.999995240003773,14,349,cellular ion homeostasis,BP,L2/3 IT,cells,hypergeometric
GO:0048858,0.0000221161303893872,0.999994131003311,18,550,cell projection morphogenesis,BP,L2/3 IT,cells,hypergeometric
GO:0098590,0.0000241071946688742,0.999992850929752,21,720,plasma membrane region,CC,L2/3 IT,cells,hypergeometric
GO:0044309,0.0000257316534572539,0.999996001352853,10,182,neuron spine,CC,L2/3 IT,cells,hypergeometric
GO:0098793,0.0000271997346938287,0.999993627119917,15,404,presynapse,CC,L2/3 IT,cells,hypergeometric
GO:0032989,0.000028408310698295,0.999992014284711,19,615,cellular component morphogenesis,BP,L2/3 IT,cells,hypergeometric
GO:2000026,0.0000317407578953409,0.999990123293232,22,792,regulation of multicellular organismal development,BP,L2/3 IT,cells,hypergeometric
GO:0044057,0.0000319730220243552,0.999992830280669,14,361,regulation of system process,BP,L2/3 IT,cells,hypergeometric
GO:0010646,0.0000348598525836335,0.999985715390548,40,2008,regulation of cell communication,BP,L2/3 IT,cells,hypergeometric
GO:0032990,0.0000355287156165301,0.999990208154382,18,570,cell part morphogenesis,BP,L2/3 IT,cells,hypergeometric
GO:0030424,0.0000380697927793277,0.999989449352857,18,573,axon,CC,L2/3 IT,cells,hypergeometric
GO:0003056,0.0000412937300463299,0.999999563784901,3,7,regulation of vascular associated smooth muscle contraction,BP,L2/3 IT,cells,hypergeometric
GO:0030154,0.0000435958129164299,0.999981322747748,45,2406,cell differentiation,BP,L2/3 IT,cells,hypergeometric
GO:0007165,0.0000437795137762595,0.999980788509114,50,2800,signal transduction,BP,L2/3 IT,cells,hypergeometric
GO:0003012,0.0000442763396803103,0.999991841082098,11,235,muscle system process,BP,L2/3 IT,cells,hypergeometric
GO:0006937,0.0000466153308823611,0.99999514605632,7,89,regulation of muscle contraction,BP,L2/3 IT,cells,hypergeometric
GO:0008217,0.0000466153308823611,0.99999514605632,7,89,regulation of blood pressure,BP,L2/3 IT,cells,hypergeometric
GO:0050801,0.0000501177768507023,0.999987584797856,15,426,ion homeostasis,BP,L2/3 IT,cells,hypergeometric
GO:0099061,0.0000502343415908863,0.999997142795379,5,38,integral component of postsynaptic density membrane,CC,L2/3 IT,cells,hypergeometric
GO:0055074,0.0000536252927808227,0.999989897899002,11,240,calcium ion homeostasis,BP,L2/3 IT,cells,hypergeometric
GO:0002026,0.0000541826376833793,0.999998188764262,4,20,regulation of the force of heart contraction,BP,L2/3 IT,cells,hypergeometric
GO:0120036,0.0000563857746801267,0.999979665983699,27,1137,plasma membrane bounded cell projection organization,BP,L2/3 IT,cells,hypergeometric
GO:0048812,0.0000595329792594614,0.999983553255476,17,538,neuron projection morphogenesis,BP,L2/3 IT,cells,hypergeometric
GO:0016020,0.0000615648749583273,0.999971886395966,71,4644,membrane,CC,L2/3 IT,cells,hypergeometric
GO:0051963,0.0000618640680186295,0.999993246296082,7,93,regulation of synapse assembly,BP,L2/3 IT,cells,hypergeometric
GO:1905563,0.000457842495913169,0.999998124335282,2,3,negative regulation of vascular endothelial cell proliferation,BP,L2/3 IT,nuclei,goseq
GO:0051963,0.000565263703529828,0.99988708709345,9,88,regulation of synapse assembly,BP,L2/3 IT,nuclei,goseq
GO:1904706,0.000830279093839338,0.999969401324728,3,14,negative regulation of vascular associated smooth muscle cell proliferation,BP,L2/3 IT,nuclei,goseq
GO:0005499,0.00109390724617748,1,1,1,vitamin D binding,MF,L2/3 IT,nuclei,goseq
GO:0035502,0.00109390724617748,1,1,1,metanephric part of ureteric bud development,BP,L2/3 IT,nuclei,goseq
GO:0072025,0.00109390724617748,1,1,1,distal convoluted tubule development,BP,L2/3 IT,nuclei,goseq
GO:0072027,0.00109390724617748,1,1,1,connecting tubule development,BP,L2/3 IT,nuclei,goseq
GO:0072221,0.00109390724617748,1,1,1,metanephric distal convoluted tubule development,BP,L2/3 IT,nuclei,goseq
GO:0072235,0.00109390724617748,1,1,1,metanephric distal tubule development,BP,L2/3 IT,nuclei,goseq
GO:0072286,0.00109390724617748,1,1,1,metanephric connecting tubule development,BP,L2/3 IT,nuclei,goseq
GO:0099510,0.00109390724617748,1,1,1,calcium ion binding involved in regulation of cytosolic calcium ion concentration,MF,L2/3 IT,nuclei,goseq
GO:0099534,0.00109390724617748,1,1,1,calcium ion binding involved in regulation of presynaptic cytosolic calcium ion concentration,MF,L2/3 IT,nuclei,goseq
GO:0099567,0.00109390724617748,1,1,1,calcium ion binding involved in regulation of postsynaptic cytosolic calcium ion concentration,MF,L2/3 IT,nuclei,goseq
GO:0003012,0.00128607394540056,0.999676143916067,10,217,muscle system process,BP,L2/3 IT,nuclei,goseq
GO:0050807,0.0014074181704808,0.999592303292204,12,212,regulation of synapse organization,BP,L2/3 IT,nuclei,goseq
GO:0050803,0.001451911715479,0.999577694961368,12,215,regulation of synapse structure or activity,BP,L2/3 IT,nuclei,goseq
GO:0045685,0.0014789976124248,0.999871969274021,4,46,regulation of glial cell differentiation,BP,L2/3 IT,nuclei,goseq
GO:0007267,0.0017899132322344,0.999229665700574,25,973,cell-cell signaling,BP,L2/3 IT,nuclei,goseq
GO:0051722,0.00183894033301862,1,1,1,protein C-terminal methylesterase activity,MF,L2/3 IT,nuclei,goseq
GO:0051723,0.00183894033301862,1,1,1,protein methylesterase activity,MF,L2/3 IT,nuclei,goseq
GO:0043031,0.00192522697878316,0.999968025129966,2,8,negative regulation of macrophage activation,BP,L2/3 IT,nuclei,goseq
GO:0043535,0.00195912029444932,0.999816207610072,4,49,regulation of blood vessel endothelial cell migration,BP,L2/3 IT,nuclei,goseq
GO:0007416,0.00200745465331638,0.999431615690399,11,146,synapse assembly,BP,L2/3 IT,nuclei,goseq
GO:1901888,0.00206284655753238,0.999450598884873,10,151,regulation of cell junction assembly,BP,L2/3 IT,nuclei,goseq
GO:0010469,0.00208036778233842,0.9996539682949,6,90,regulation of signaling receptor activity,BP,L2/3 IT,nuclei,goseq
GO:0050808,0.00210654809780345,0.999217728858944,17,389,synapse organization,BP,L2/3 IT,nuclei,goseq
GO:0120039,0.0021795895339075,0.999143464882473,19,535,plasma membrane bounded cell projection morphogenesis,BP,L2/3 IT,nuclei,goseq
GO:0048858,0.00220820662609079,0.999131105631363,19,538,cell projection morphogenesis,BP,L2/3 IT,nuclei,goseq
GO:0001764,0.00227697342197855,0.999432945541994,9,137,neuron migration,BP,L2/3 IT,nuclei,goseq
GO:0032990,0.00255801803209001,0.998979081380907,19,556,cell part morphogenesis,BP,L2/3 IT,nuclei,goseq
GO:0098925,0.00260894727653035,1,1,1,"retrograde trans-synaptic signaling by nitric oxide, modulating synaptic transmission",BP,L2/3 IT,nuclei,goseq
GO:0098794,0.0027286291896771,0.998905284452691,19,512,postsynapse,CC,L2/3 IT,nuclei,goseq
GO:1904705,0.00303209248455127,0.999805730663107,3,34,regulation of vascular associated smooth muscle cell proliferation,BP,L2/3 IT,nuclei,goseq
GO:1990874,0.00303209248455127,0.999805730663107,3,34,vascular associated smooth muscle cell proliferation,BP,L2/3 IT,nuclei,goseq
GO:0048662,0.00328650045055568,0.999784628960141,3,31,negative regulation of smooth muscle cell proliferation,BP,L2/3 IT,nuclei,goseq
GO:0023052,0.00332973534913493,0.998307960457528,47,3017,signaling,BP,L2/3 IT,nuclei,goseq
GO:0004692,0.00339321713274916,1,2,2,cGMP-dependent protein kinase activity,MF,L2/3 IT,nuclei,goseq
GO:0031226,0.00354346911617361,0.99848313332475,21,619,intrinsic component of plasma membrane,CC,L2/3 IT,nuclei,goseq
GO:0007154,0.0036231528876277,0.998148342797342,47,3053,cell communication,BP,L2/3 IT,nuclei,goseq
GO:0099634,0.00372945591000917,0.999203073579287,7,68,postsynaptic specialization membrane,CC,L2/3 IT,nuclei,goseq
GO:0099148,0.0037607751552126,1,1,1,regulation of synaptic vesicle docking,BP,L2/3 IT,nuclei,goseq
GO:0099573,0.0037607751552126,1,1,1,glutamatergic postsynaptic density,CC,L2/3 IT,nuclei,goseq
GO:1990443,0.0037607751552126,1,1,1,peptidyl-threonine autophosphorylation,BP,L2/3 IT,nuclei,goseq
GO:0065008,0.0038279890148641,0.998069136928788,38,2237,regulation of biological quality,BP,L2/3 IT,nuclei,goseq
GO:1901890,0.00398855421672173,0.999126798044979,7,88,positive regulation of cell junction assembly,BP,L2/3 IT,nuclei,goseq
GO:0014912,0.00419531101437742,0.999713342149863,3,19,negative regulation of smooth muscle cell migration,BP,L2/3 IT,nuclei,goseq
GO:0008074,0.00422209384759917,0.999995586294476,1,2,"guanylate cyclase complex, soluble",CC,L2/3 IT,nuclei,goseq
GO:0047805,0.00422209384759917,0.999995586294476,1,2,cytidylate cyclase activity,MF,L2/3 IT,nuclei,goseq
GO:0099554,0.00422209384759917,0.999995586294476,1,2,"trans-synaptic signaling by soluble gas, modulating synaptic transmission",BP,L2/3 IT,nuclei,goseq
GO:0099555,0.00422209384759917,0.999995586294476,1,2,"trans-synaptic signaling by nitric oxide, modulating synaptic transmission",BP,L2/3 IT,nuclei,goseq
GO:0005887,0.00423253296451184,0.998191417617688,20,583,integral component of plasma membrane,CC,L2/3 IT,nuclei,goseq
GO:0032989,0.00425700882954342,0.998214377806845,19,602,cellular component morphogenesis,BP,L2/3 IT,nuclei,goseq
GO:0036289,0.00436593285970039,0.999886587484889,2,9,peptidyl-serine autophosphorylation,BP,L2/3 IT,nuclei,goseq
GO:0043269,0.00469313496905128,0.998267808740982,14,419,regulation of ion transport,BP,L2/3 IT,nuclei,goseq
GO:0048812,0.00471918041345704,0.998044885371472,18,524,neuron projection morphogenesis,BP,L2/3 IT,nuclei,goseq
GO:0034330,0.00485521536768176,0.997939296741857,19,536,cell junction organization,BP,L2/3 IT,nuclei,goseq
GO:0072102,0.00487516910053798,0.999881028673269,2,6,glomerulus morphogenesis,BP,L2/3 IT,nuclei,goseq
GO:0034765,0.00516273440384288,0.998230142215009,12,293,regulation of ion transmembrane transport,BP,L2/3 IT,nuclei,goseq
GO:0043534,0.00519382466492449,0.99935420670624,4,61,blood vessel endothelial cell migration,BP,L2/3 IT,nuclei,goseq
GO:0006182,0.00531060005484944,0.999990687129859,1,3,cGMP biosynthetic process,BP,L2/3 IT,nuclei,goseq
GO:0099060,0.005441058663166,0.998927372118795,6,52,integral component of postsynaptic specialization membrane,CC,L2/3 IT,nuclei,goseq
GO:0010594,0.00567243242632547,0.99903845412837,5,92,regulation of endothelial cell migration,BP,L2/3 IT,nuclei,goseq
GO:0098948,0.00568856288474078,0.998865413563522,6,54,intrinsic component of postsynaptic specialization membrane,CC,L2/3 IT,nuclei,goseq
GO:0051965,0.00581473210092637,0.998826827367484,6,61,positive regulation of synapse assembly,BP,L2/3 IT,nuclei,goseq
GO:0014013,0.00585807976233944,0.999244924491376,4,64,regulation of gliogenesis,BP,L2/3 IT,nuclei,goseq
GO:0101023,0.00592643282925433,0.999804418131651,2,15,vascular endothelial cell proliferation,BP,L2/3 IT,nuclei,goseq
GO:1905562,0.00592643282925433,0.999804418131651,2,15,regulation of vascular endothelial cell proliferation,BP,L2/3 IT,nuclei,goseq
GO:0051960,0.00600589604566749,0.997894471760793,12,358,regulation of nervous system development,BP,L2/3 IT,nuclei,goseq
GO:0045211,0.00614077952956367,0.99786008200966,12,207,postsynaptic membrane,CC,L2/3 IT,nuclei,goseq
GO:0043537,0.00620694713075662,0.999788706099181,2,16,negative regulation of blood vessel endothelial cell migration,BP,L2/3 IT,nuclei,goseq
GO:0010661,0.00655719560724083,0.999761067141713,2,26,positive regulation of muscle cell apoptotic process,BP,L2/3 IT,nuclei,goseq
GO:0098839,0.00665180446508725,0.998630409040082,6,53,postsynaptic density membrane,CC,L2/3 IT,nuclei,goseq
GO:0090257,0.00705066259511729,0.998258838521187,7,141,regulation of muscle system process,BP,L2/3 IT,nuclei,goseq
GO:0099528,0.00707696745921978,0.999790466657517,2,6,G protein-coupled neurotransmitter receptor activity,MF,L2/3 IT,nuclei,goseq
GO:0060284,0.00723308760254331,0.997521734774307,11,366,regulation of cell development,BP,L2/3 IT,nuclei,goseq
GO:0098953,0.0073186785909135,0.999758484066374,2,8,receptor diffusion trapping,BP,L2/3 IT,nuclei,goseq
GO:0098970,0.0073186785909135,0.999758484066374,2,8,postsynaptic neurotransmitter receptor diffusion trapping,BP,L2/3 IT,nuclei,goseq
GO:0099628,0.0073186785909135,0.999758484066374,2,8,neurotransmitter receptor diffusion trapping,BP,L2/3 IT,nuclei,goseq
GO:0034220,0.00745718761741185,0.996992099166995,15,538,ion transmembrane transport,BP,L2/3 IT,nuclei,goseq
GO:0036477,0.00786273946788177,0.996364272654891,21,790,somatodendritic compartment,CC,L2/3 IT,nuclei,goseq
GO:0061642,0.00797956604120315,0.999984204426995,1,2,chemoattraction of axon,BP,L2/3 IT,nuclei,goseq
GO:0034329,0.00804167783301541,0.99695945239318,13,283,cell junction assembly,BP,L2/3 IT,nuclei,goseq
GO:0072006,0.00814437980369026,0.998849297659177,4,60,nephron development,BP,L2/3 IT,nuclei,goseq
GO:0072080,0.0085716834177539,0.999202170415073,3,34,nephron tubule development,BP,L2/3 IT,nuclei,goseq
GO:0030425,0.00873782399044853,0.996219434249916,17,578,dendrite,CC,L2/3 IT,nuclei,goseq
GO:2000311,0.00888756265586231,0.999193781197134,3,21,regulation of AMPA receptor activity,BP,L2/3 IT,nuclei,goseq
GO:0010646,0.00910741091545966,0.995230325041458,32,1909,regulation of cell communication,BP,L2/3 IT,nuclei,goseq
GO:0051241,0.00924386313438625,0.996556020650582,12,520,negative regulation of multicellular organismal process,BP,L2/3 IT,nuclei,goseq
GO:0099536,0.00933123815671239,0.995847008680754,18,560,synaptic signaling,BP,L2/3 IT,nuclei,goseq
GO:0097447,0.00943151260606178,0.995884673568257,17,581,dendritic tree,CC,L2/3 IT,nuclei,goseq
GO:0023051,0.00954098747192856,0.994984189535921,32,1917,regulation of signaling,BP,L2/3 IT,nuclei,goseq
GO:0050918,0.00965402013920732,0.999085408703182,3,24,positive chemotaxis,BP,L2/3 IT,nuclei,goseq
GO:0099061,0.0096803698172694,0.998211885920082,5,38,integral component of postsynaptic density membrane,CC,L2/3 IT,nuclei,goseq
GO:0003299,0.00979893387415391,0.999577298760691,2,16,muscle hypertrophy in response to stress,BP,L2/3 IT,nuclei,goseq
GO:0014898,0.00979893387415391,0.999577298760691,2,16,cardiac muscle hypertrophy in response to stress,BP,L2/3 IT,nuclei,goseq
GO:0014887,0.00998061005905166,0.99956262189753,2,17,cardiac muscle adaptation,BP,L2/3 IT,nuclei,goseq
GO:0099146,0.0101589517861703,0.998093598613203,5,40,intrinsic component of postsynaptic density membrane,CC,L2/3 IT,nuclei,goseq
GO:0045666,0.0102979506965738,0.998440743297708,4,62,positive regulation of neuron differentiation,BP,L2/3 IT,nuclei,goseq
GO:0010632,0.0106145253590275,0.997500142337185,6,132,regulation of epithelial cell migration,BP,L2/3 IT,nuclei,goseq
GO:0048667,0.0107379701499774,0.995363942618938,16,480,cell morphogenesis involved in neuron differentiation,BP,L2/3 IT,nuclei,goseq
GO:0050808,1.38002544753898e-08,0.999999998049335,17,389,synapse organization,BP,L2/3 IT,nuclei,hypergeometric
GO:0071944,1.6530003485892e-08,0.999999995405171,46,2627,cell periphery,CC,L2/3 IT,nuclei,hypergeometric
GO:0031226,1.85419056856192e-08,0.999999996682796,21,619,intrinsic component of plasma membrane,CC,L2/3 IT,nuclei,hypergeometric
GO:0098794,2.43259959308305e-08,0.999999995973795,19,512,postsynapse,CC,L2/3 IT,nuclei,hypergeometric
GO:0007416,2.74809124066572e-08,0.999999997748945,11,146,synapse assembly,BP,L2/3 IT,nuclei,hypergeometric
GO:0005887,3.61917815282048e-08,0.99999999354098,20,583,integral component of plasma membrane,CC,L2/3 IT,nuclei,hypergeometric
GO:0051963,3.85249842707078e-08,0.999999997734148,9,88,regulation of synapse assembly,BP,L2/3 IT,nuclei,hypergeometric
GO:0120039,4.91453409499224e-08,0.999999991472402,19,535,plasma membrane bounded cell projection morphogenesis,BP,L2/3 IT,nuclei,hypergeometric
GO:0034330,5.06279593516101e-08,0.999999991197486,19,536,cell junction organization,BP,L2/3 IT,nuclei,hypergeometric
GO:0048858,5.37176397567533e-08,0.999999990622822,19,538,cell projection morphogenesis,BP,L2/3 IT,nuclei,hypergeometric
GO:0032990,9.04513449129754e-08,0.999999983641817,19,556,cell part morphogenesis,BP,L2/3 IT,nuclei,hypergeometric
GO:0045211,1.1398322837572e-07,0.999999987670478,12,207,postsynaptic membrane,CC,L2/3 IT,nuclei,hypergeometric
GO:0050807,1.47982082627954e-07,0.999999983579002,12,212,regulation of synapse organization,BP,L2/3 IT,nuclei,hypergeometric
GO:0007267,1.53042209036659e-07,0.999999964362098,25,973,cell-cell signaling,BP,L2/3 IT,nuclei,hypergeometric
GO:0050803,1.7248486471157e-07,0.999999980570527,12,215,regulation of synapse structure or activity,BP,L2/3 IT,nuclei,hypergeometric
GO:0048812,1.94479322717766e-07,0.999999964723445,18,524,neuron projection morphogenesis,BP,L2/3 IT,nuclei,hypergeometric
GO:0032989,3.126938158191e-07,0.999999938404479,19,602,cellular component morphogenesis,BP,L2/3 IT,nuclei,hypergeometric
GO:1901888,4.13010549003891e-07,0.999999960993535,10,151,regulation of cell junction assembly,BP,L2/3 IT,nuclei,hypergeometric
GO:0023052,4.72658175483992e-07,0.999999848626905,47,3017,signaling,BP,L2/3 IT,nuclei,hypergeometric
GO:0034329,4.83146628106067e-07,0.999999933380097,13,283,cell junction assembly,BP,L2/3 IT,nuclei,hypergeometric
GO:0099536,5.1992568324646e-07,0.999999898734908,18,560,synaptic signaling,BP,L2/3 IT,nuclei,hypergeometric
GO:0098742,5.30208873564542e-07,0.999999956563862,9,119,cell-cell adhesion via plasma-membrane adhesion molecules,BP,L2/3 IT,nuclei,hypergeometric
GO:0030054,6.34541963610434e-07,0.99999982514441,29,1361,cell junction,CC,L2/3 IT,nuclei,hypergeometric
GO:0007154,6.90725743314386e-07,0.99999977512029,47,3053,cell communication,BP,L2/3 IT,nuclei,hypergeometric
GO:0005886,7.07999362283809e-07,0.999999774989176,41,2446,plasma membrane,CC,L2/3 IT,nuclei,hypergeometric
GO:0036477,0.00000114076609481206,0.999999734132122,21,790,somatodendritic compartment,CC,L2/3 IT,nuclei,hypergeometric
GO:0099634,0.00000130262751990933,0.999999924360734,7,68,postsynaptic specialization membrane,CC,L2/3 IT,nuclei,hypergeometric
GO:0099537,0.00000147756265692118,0.999999704066675,17,539,trans-synaptic signaling,BP,L2/3 IT,nuclei,hypergeometric
GO:0048667,0.00000153810712902888,0.999999707480897,16,480,cell morphogenesis involved in neuron differentiation,BP,L2/3 IT,nuclei,hypergeometric
GO:0043005,0.00000158608578730692,0.999999576284593,25,1101,neuron projection,CC,L2/3 IT,nuclei,hypergeometric
GO:0098984,0.0000016777986625926,0.999999739985543,13,316,neuron to neuron synapse,CC,L2/3 IT,nuclei,hypergeometric
GO:0045202,0.00000173835931393094,0.999999544451617,24,1030,synapse,CC,L2/3 IT,nuclei,hypergeometric
GO:0001764,0.00000174121696268554,0.999999833987125,9,137,neuron migration,BP,L2/3 IT,nuclei,hypergeometric
GO:0065008,0.00000179484710727029,0.999999416487083,38,2237,regulation of biological quality,BP,L2/3 IT,nuclei,hypergeometric
GO:0032501,0.00000243164023488963,0.999999160875788,52,3729,multicellular organismal process,BP,L2/3 IT,nuclei,hypergeometric
GO:0007399,0.00000334801397815236,0.999998972470391,30,1560,nervous system development,BP,L2/3 IT,nuclei,hypergeometric
GO:0000904,0.00000382468897616763,0.999999174729041,17,578,cell morphogenesis involved in differentiation,BP,L2/3 IT,nuclei,hypergeometric
GO:0030425,0.00000382468897616763,0.999999174729041,17,578,dendrite,CC,L2/3 IT,nuclei,hypergeometric
GO:0099060,0.0000039501135383989,0.999999800077236,6,52,integral component of postsynaptic specialization membrane,CC,L2/3 IT,nuclei,hypergeometric
GO:0097447,0.00000410074356600074,0.999999110266149,17,581,dendritic tree,CC,L2/3 IT,nuclei,hypergeometric
GO:0098978,0.00000427321804157262,0.999999336472749,12,291,glutamatergic synapse,CC,L2/3 IT,nuclei,hypergeometric
GO:0098839,0.00000442517223680122,0.999999771179599,6,53,postsynaptic density membrane,CC,L2/3 IT,nuclei,hypergeometric
GO:0000902,0.00000443002060070636,0.999998905311752,20,788,cell morphogenesis,BP,L2/3 IT,nuclei,hypergeometric
GO:0034765,0.00000458521015564421,0.99999928287154,12,293,regulation of ion transmembrane transport,BP,L2/3 IT,nuclei,hypergeometric
GO:0098948,0.00000494567387755685,0.999999738840889,6,54,intrinsic component of postsynaptic specialization membrane,CC,L2/3 IT,nuclei,hypergeometric
GO:0007268,0.0000055442936511463,0.99999882852675,16,530,chemical synaptic transmission,BP,L2/3 IT,nuclei,hypergeometric
GO:0098916,0.0000055442936511463,0.99999882852675,16,530,anterograde trans-synaptic signaling,BP,L2/3 IT,nuclei,hypergeometric
GO:0032279,0.00000564506854040148,0.999999098060227,12,299,asymmetric synapse,CC,L2/3 IT,nuclei,hypergeometric
GO:0099572,0.00000625172714816246,0.999998990580717,12,302,postsynaptic specialization,CC,L2/3 IT,nuclei,hypergeometric
GO:0097060,0.00000646632591865745,0.999998952293036,12,303,synaptic membrane,CC,L2/3 IT,nuclei,hypergeometric
GO:0043269,0.00000735685392217779,0.999998587222794,14,419,regulation of ion transport,BP,L2/3 IT,nuclei,hypergeometric
GO:1901890,0.0000074694965760296,0.999999424438918,7,88,positive regulation of cell junction assembly,BP,L2/3 IT,nuclei,hypergeometric
GO:0051965,0.000010154180338044,0.999999385891021,6,61,positive regulation of synapse assembly,BP,L2/3 IT,nuclei,hypergeometric
GO:0003012,0.0000109680300896365,0.999998477288807,10,217,muscle system process,BP,L2/3 IT,nuclei,hypergeometric
GO:0099061,0.0000137089224657383,0.999999412642618,5,38,integral component of postsynaptic density membrane,CC,L2/3 IT,nuclei,hypergeometric
GO:0003008,0.0000147211499722755,0.999995907234729,21,929,system process,BP,L2/3 IT,nuclei,hypergeometric
GO:0099146,0.0000177403250686653,0.999999194038158,5,40,intrinsic component of postsynaptic density membrane,CC,L2/3 IT,nuclei,hypergeometric
GO:0032879,0.0000193844308929071,0.999993422384531,30,1700,regulation of localization,BP,L2/3 IT,nuclei,hypergeometric
GO:0031175,0.0000219436354067855,0.999994106533197,19,803,neuron projection development,BP,L2/3 IT,nuclei,hypergeometric
GO:0014069,0.0000242572601431863,0.999995875635187,11,290,postsynaptic density,CC,L2/3 IT,nuclei,hypergeometric
GO:0048699,0.000025574529595192,0.999992208724792,23,1122,generation of neurons,BP,L2/3 IT,nuclei,hypergeometric
GO:0010646,0.0000258735875782855,0.999990851085562,32,1909,regulation of cell communication,BP,L2/3 IT,nuclei,hypergeometric
GO:0023051,0.0000282201943284998,0.999989971155675,32,1917,regulation of signaling,BP,L2/3 IT,nuclei,hypergeometric
GO:0099055,0.0000287696627971804,0.999997882167813,6,73,integral component of postsynaptic membrane,CC,L2/3 IT,nuclei,hypergeometric
GO:0034220,0.0000290159175535509,0.999993291010711,15,538,ion transmembrane transport,BP,L2/3 IT,nuclei,hypergeometric
GO:0005509,0.0000293070495880007,0.999994909121457,11,296,calcium ion binding,MF,L2/3 IT,nuclei,hypergeometric
GO:0034762,0.0000307406799729032,0.999994136028339,12,354,regulation of transmembrane transport,BP,L2/3 IT,nuclei,hypergeometric
GO:0051960,0.0000343246272259379,0.999993374922204,12,358,regulation of nervous system development,BP,L2/3 IT,nuclei,hypergeometric
GO:0098936,0.0000390306116620195,0.999996956147476,6,77,intrinsic component of postsynaptic membrane,CC,L2/3 IT,nuclei,hypergeometric
GO:0048731,0.0000511712014791206,0.999980110321022,39,2665,system development,BP,L2/3 IT,nuclei,hypergeometric
GO:0016021,0.0000552686864164399,0.999978834927829,36,2370,integral component of membrane,CC,L2/3 IT,nuclei,hypergeometric
GO:0016358,0.0000629635109483365,0.999989181798851,10,266,dendrite development,BP,L2/3 IT,nuclei,hypergeometric
GO:0098609,0.000066109529845442,0.999986307232358,12,383,cell-cell adhesion,BP,L2/3 IT,nuclei,hypergeometric
GO:0004692,0.0000671517503337975,1,2,2,cGMP-dependent protein kinase activity,MF,L2/3 IT,nuclei,hypergeometric
GO:0007165,0.0000674036155145321,0.999973402049008,39,2696,signal transduction,BP,L2/3 IT,nuclei,hypergeometric
GO:0022008,0.0000685123028602005,0.999977637762376,23,1194,neurogenesis,BP,L2/3 IT,nuclei,hypergeometric
GO:0032412,0.0000823638258836131,0.999988710487766,8,172,regulation of ion transmembrane transporter activity,BP,L2/3 IT,nuclei,hypergeometric
GO:0050804,0.0000867084458352074,0.999981502051473,12,394,modulation of chemical synaptic transmission,BP,L2/3 IT,nuclei,hypergeometric
GO:0099177,0.0000888298374993782,0.99998099930478,12,395,regulation of trans-synaptic signaling,BP,L2/3 IT,nuclei,hypergeometric
GO:0048666,0.0000898384058040595,0.999973041561683,19,890,neuron development,BP,L2/3 IT,nuclei,hypergeometric
GO:0010469,0.0000941102603486005,0.999991325041918,6,90,regulation of signaling receptor activity,BP,L2/3 IT,nuclei,hypergeometric
GO:0022898,0.0000967584135430478,0.999986415001429,8,176,regulation of transmembrane transporter activity,BP,L2/3 IT,nuclei,hypergeometric
GO:0044057,0.0000975340398687389,0.999980542039328,11,338,regulation of system process,BP,L2/3 IT,nuclei,hypergeometric
GO:0031224,0.0000995191507190332,0.999960585742239,36,2434,intrinsic component of membrane,CC,L2/3 IT,nuclei,hypergeometric
GO:1905606,0.000100109402841487,0.999995901043452,4,30,regulation of presynapse assembly,BP,L2/3 IT,nuclei,hypergeometric
GO:0099173,0.00010066567882964,0.999985782565636,8,177,postsynapse organization,BP,L2/3 IT,nuclei,hypergeometric
GO:0048468,0.000109958326187217,0.999961410133977,25,1404,cell development,BP,L2/3 IT,nuclei,hypergeometric
GO:0099699,0.000119883493306347,0.999988426528298,6,94,integral component of synaptic membrane,CC,L2/3 IT,nuclei,hypergeometric
GO:0032409,0.000122219242024575,0.999982229544375,8,182,regulation of transporter activity,BP,L2/3 IT,nuclei,hypergeometric
GO:0034702,0.000122219242024575,0.999982229544375,8,182,ion channel complex,CC,L2/3 IT,nuclei,hypergeometric
GO:0007275,0.000132551897515488,0.999945190206615,41,2986,multicellular organism development,BP,L2/3 IT,nuclei,hypergeometric
GO:0050896,0.000152777194582233,0.99993546042274,51,4122,response to stimulus,BP,L2/3 IT,nuclei,hypergeometric
GO:0040011,0.000155130018527271,0.999949932771123,20,1008,locomotion,BP,L2/3 IT,nuclei,hypergeometric
GO:0090257,0.000156466638710629,0.999980096037559,7,141,regulation of muscle system process,BP,L2/3 IT,nuclei,hypergeometric
GO:0099174,0.000165209582794888,0.999992201035257,4,34,regulation of presynapse organization,BP,L2/3 IT,nuclei,hypergeometric
GO:0051962,0.000173003362621287,0.999969711352627,9,244,positive regulation of nervous system development,BP,L2/3 IT,nuclei,hypergeometric
GO:0051716,0.000173351035220594,0.999926306533676,46,3567,cellular response to stimulus,BP,L2/3 IT,nuclei,hypergeometric
GO:0098797,0.000174976479680484,0.999965813368211,10,301,plasma membrane protein complex,CC,L2/3 IT,nuclei,hypergeometric
GO:1904706,0.000184298658817361,0.999995956320333,3,14,negative regulation of vascular associated smooth muscle cell proliferation,BP,L2/3 IT,nuclei,hypergeometric
GO:0030182,0.000187079235133654,0.999938709095474,20,1022,neuron differentiation,BP,L2/3 IT,nuclei,hypergeometric
GO:0031224,5.91015882343744e-14,1,77,2512,intrinsic component of membrane,CC,L5 ET,cells,goseq
GO:0015453,9.81399086409303e-14,1,11,42,oxidoreduction-driven active transmembrane transporter activity,MF,L5 ET,cells,goseq
GO:0009055,2.73932659703659e-12,1,11,50,electron transfer activity,MF,L5 ET,cells,goseq
GO:1902495,4.01573229551826e-12,1,22,256,transmembrane transporter complex,CC,L5 ET,cells,goseq
GO:0022857,4.53830208696852e-12,1,33,595,transmembrane transporter activity,MF,L5 ET,cells,goseq
GO:0016021,5.69799588836986e-12,1,72,2441,integral component of membrane,CC,L5 ET,cells,goseq
GO:1990351,9.01652871835225e-12,1,22,267,transporter complex,CC,L5 ET,cells,goseq
GO:0006119,2.77561446216907e-11,1,13,94,oxidative phosphorylation,BP,L5 ET,cells,goseq
GO:0022904,3.54774051826963e-11,1,12,75,respiratory electron transport chain,BP,L5 ET,cells,goseq
GO:0042773,3.79074290406334e-11,1,11,61,ATP synthesis coupled electron transport,BP,L5 ET,cells,goseq
GO:0005215,6.01479792435963e-11,1,33,655,transporter activity,MF,L5 ET,cells,goseq
GO:0043005,9.34025155511781e-11,1,45,1138,neuron projection,CC,L5 ET,cells,goseq
GO:0022900,9.51260839396343e-11,1,12,80,electron transport chain,BP,L5 ET,cells,goseq
GO:0070469,3.02749752616542e-10,0.999999999984915,11,77,respirasome,CC,L5 ET,cells,goseq
GO:0008137,6.73873066298777e-10,0.999999999990482,7,21,NADH dehydrogenase (ubiquinone) activity,MF,L5 ET,cells,goseq
GO:0050136,6.73873066298777e-10,0.999999999990482,7,21,NADH dehydrogenase (quinone) activity,MF,L5 ET,cells,goseq
GO:0015399,1.29459624222869e-09,0.999999999901133,13,113,primary active transmembrane transporter activity,MF,L5 ET,cells,goseq
GO:0098803,1.59912280357679e-09,0.999999999922326,10,69,respiratory chain complex,CC,L5 ET,cells,goseq
GO:0019646,1.73109955698583e-09,0.999999999933486,9,49,aerobic electron transport chain,BP,L5 ET,cells,goseq
GO:0046034,1.87306854112335e-09,0.999999999783162,16,192,ATP metabolic process,BP,L5 ET,cells,goseq
GO:0003955,1.91824218800325e-09,0.999999999964862,7,23,NAD(P)H dehydrogenase (quinone) activity,MF,L5 ET,cells,goseq
GO:0003954,2.90634209861745e-09,0.999999999942007,7,24,NADH dehydrogenase activity,MF,L5 ET,cells,goseq
GO:0016655,4.17379722315067e-09,0.999999999910682,7,25,"oxidoreductase activity, acting on NAD(P)H, quinone or similar compound as acceptor",MF,L5 ET,cells,goseq
GO:0009060,5.14910376935708e-09,0.999999999523362,13,131,aerobic respiration,BP,L5 ET,cells,goseq
GO:0015318,7.49038754709482e-09,0.99999999855349,23,396,inorganic molecular entity transmembrane transporter activity,MF,L5 ET,cells,goseq
GO:0016020,1.10012495506963e-08,0.999999995897293,100,4644,membrane,CC,L5 ET,cells,goseq
GO:0007411,1.12969259645143e-08,0.999999998623464,15,158,axon guidance,BP,L5 ET,cells,goseq
GO:0015988,1.15624880451196e-08,0.999999999984166,4,5,"energy coupled proton transmembrane transport, against electrochemical gradient",BP,L5 ET,cells,goseq
GO:0015990,1.15624880451196e-08,0.999999999984166,4,5,electron transport coupled proton transport,BP,L5 ET,cells,goseq
GO:0097485,1.22614428600988e-08,0.99999999849599,15,159,neuron projection guidance,BP,L5 ET,cells,goseq
GO:0045333,1.26044629623527e-08,0.999999998580667,14,164,cellular respiration,BP,L5 ET,cells,goseq
GO:0030054,1.29999904108725e-08,0.999999995798006,47,1411,cell junction,CC,L5 ET,cells,goseq
GO:0042775,1.42466480498553e-08,0.999999999260606,9,59,mitochondrial ATP synthesis coupled electron transport,BP,L5 ET,cells,goseq
GO:0045202,2.43866608615305e-08,0.999999992619292,39,1067,synapse,CC,L5 ET,cells,goseq
GO:0015075,2.84673390730904e-08,0.999999993815852,24,460,ion transmembrane transporter activity,MF,L5 ET,cells,goseq
GO:0022804,3.04425850424331e-08,0.999999995621625,16,217,active transmembrane transporter activity,MF,L5 ET,cells,goseq
GO:0007409,3.76050988903291e-08,0.999999992643213,21,352,axonogenesis,BP,L5 ET,cells,goseq
GO:0008324,3.87870835717494e-08,0.999999992391013,21,364,cation transmembrane transporter activity,MF,L5 ET,cells,goseq
GO:0036477,4.19186742072386e-08,0.999999988233217,33,817,somatodendritic compartment,CC,L5 ET,cells,goseq
GO:0022890,4.76084737340171e-08,0.999999990972259,20,336,inorganic cation transmembrane transporter activity,MF,L5 ET,cells,goseq
GO:0120025,5.30025006753727e-08,0.999999981542613,49,1574,plasma membrane bounded cell projection,CC,L5 ET,cells,goseq
GO:0007399,6.56396602130146e-08,0.999999976773981,50,1640,nervous system development,BP,L5 ET,cells,goseq
GO:0043025,7.72878182363268e-08,0.999999981053841,26,553,neuronal cell body,CC,L5 ET,cells,goseq
GO:0098796,8.28742661403459e-08,0.999999976903647,31,795,membrane protein complex,CC,L5 ET,cells,goseq
GO:0022008,9.88815197091264e-08,0.999999967063155,42,1257,neurogenesis,BP,L5 ET,cells,goseq
GO:0005883,1.19842843007918e-07,0.999999998634521,5,10,neurofilament,CC,L5 ET,cells,goseq
GO:0048699,1.3361000818918e-07,0.999999955998493,40,1175,generation of neurons,BP,L5 ET,cells,goseq
GO:0042995,1.49312202500436e-07,0.999999945108655,51,1730,cell projection,CC,L5 ET,cells,goseq
GO:0061564,1.50293492942213e-07,0.999999967880462,21,383,axon development,BP,L5 ET,cells,goseq
GO:0006811,3.15910255492384e-07,0.999999904149036,32,859,ion transport,BP,L5 ET,cells,goseq
GO:0098660,3.16851378083283e-07,0.999999926067279,22,450,inorganic ion transmembrane transport,BP,L5 ET,cells,goseq
GO:0016651,3.62115369627077e-07,0.9999999831446,7,40,"oxidoreductase activity, acting on NAD(P)H",MF,L5 ET,cells,goseq
GO:0005746,4.24065255033501e-07,0.999999972606899,8,67,mitochondrial respirasome,CC,L5 ET,cells,goseq
GO:0098800,5.21091514799657e-07,0.999999948674683,10,114,inner mitochondrial membrane protein complex,CC,L5 ET,cells,goseq
GO:0044297,6.35647661509045e-07,0.999999824758535,26,618,cell body,CC,L5 ET,cells,goseq
GO:0006120,6.35920741715255e-07,0.999999977682039,6,29,"mitochondrial electron transport, NADH to ubiquinone",BP,L5 ET,cells,goseq
GO:0030424,6.65834364511515e-07,0.999999820935871,25,573,axon,CC,L5 ET,cells,goseq
GO:0015980,6.95241350380787e-07,0.999999889164679,14,219,energy derivation by oxidation of organic compounds,BP,L5 ET,cells,goseq
GO:0006812,7.00015891778524e-07,0.999999800929175,27,673,cation transport,BP,L5 ET,cells,goseq
GO:0030182,8.42356834780479e-07,0.99999971439224,36,1068,neuron differentiation,BP,L5 ET,cells,goseq
GO:0006935,0.00000123642310060524,0.999999747576795,17,294,chemotaxis,BP,L5 ET,cells,goseq
GO:0034220,0.00000128022935862261,0.99999965208184,24,567,ion transmembrane transport,BP,L5 ET,cells,goseq
GO:0042330,0.00000139428300201186,0.999999712670882,17,297,taxis,BP,L5 ET,cells,goseq
GO:0099184,0.00000140852576393314,1,3,3,structural constituent of postsynaptic intermediate filament cytoskeleton,MF,L5 ET,cells,goseq
GO:0098742,0.00000165363708690323,0.999999789163292,11,121,cell-cell adhesion via plasma-membrane adhesion molecules,BP,L5 ET,cells,goseq
GO:0033693,0.00000183448812801481,1,3,3,neurofilament bundle assembly,BP,L5 ET,cells,goseq
GO:0099160,0.00000183448812801481,1,3,3,postsynaptic intermediate filament cytoskeleton,CC,L5 ET,cells,goseq
GO:0031226,0.00000197915764158898,0.999999417680876,26,645,intrinsic component of plasma membrane,CC,L5 ET,cells,goseq
GO:0098794,0.00000214134969526978,0.999999417222145,23,532,postsynapse,CC,L5 ET,cells,goseq
GO:0005886,0.00000239295539014779,0.999998967480031,62,2513,plasma membrane,CC,L5 ET,cells,goseq
GO:0031175,0.00000239539820606099,0.999999223542585,30,829,neuron projection development,BP,L5 ET,cells,goseq
GO:0048666,0.00000246752167315596,0.999999170186468,32,923,neuron development,BP,L5 ET,cells,goseq
GO:0098655,0.00000272539234140461,0.999999294753697,21,472,cation transmembrane transport,BP,L5 ET,cells,goseq
GO:0071944,0.00000287207150409984,0.999998739987388,65,2702,cell periphery,CC,L5 ET,cells,goseq
GO:0005216,0.00000334561403345308,0.999999343556589,15,249,ion channel activity,MF,L5 ET,cells,goseq
GO:0098609,0.00000487014839816373,0.999998785583612,19,398,cell-cell adhesion,BP,L5 ET,cells,goseq
GO:0005615,0.000005123579315768,0.99999871632725,19,421,extracellular space,CC,L5 ET,cells,goseq
GO:0006091,0.00000530783467525274,0.999998912561971,15,292,generation of precursor metabolites and energy,BP,L5 ET,cells,goseq
GO:0015267,0.00000549140518894494,0.99999887478288,15,261,channel activity,MF,L5 ET,cells,goseq
GO:0022803,0.00000549140518894494,0.99999887478288,15,261,passive transmembrane transporter activity,MF,L5 ET,cells,goseq
GO:0098662,0.00000571195342749468,0.99999855792887,19,416,inorganic cation transmembrane transport,BP,L5 ET,cells,goseq
GO:0050922,0.00000581318373969286,0.999999693549327,6,33,negative regulation of chemotaxis,BP,L5 ET,cells,goseq
GO:0007155,0.00000611329898507473,0.999998077193316,26,687,cell adhesion,BP,L5 ET,cells,goseq
GO:0005576,0.00000619184865281338,0.999998095779681,25,678,extracellular region,CC,L5 ET,cells,goseq
GO:0022610,0.00000639814582001475,0.999997982077939,26,689,biological adhesion,BP,L5 ET,cells,goseq
GO:0005747,0.00000652782562837208,0.999999636808964,6,45,mitochondrial respiratory chain complex I,CC,L5 ET,cells,goseq
GO:0030964,0.00000652782562837208,0.999999636808964,6,45,NADH dehydrogenase complex,CC,L5 ET,cells,goseq
GO:0045271,0.00000652782562837208,0.999999636808964,6,45,respiratory chain complex I,CC,L5 ET,cells,goseq
GO:0007420,0.00000691484689490005,0.999998159990171,20,451,brain development,BP,L5 ET,cells,goseq
GO:1990204,0.00000841777017862562,0.999999167294331,8,89,oxidoreductase complex,CC,L5 ET,cells,goseq
GO:0045110,0.00000873399158177925,0.999999971684979,3,4,intermediate filament bundle assembly,BP,L5 ET,cells,goseq
GO:0048667,0.00000986574087440171,0.999997212678126,21,494,cell morphogenesis involved in neuron differentiation,BP,L5 ET,cells,goseq
GO:0060052,0.0000104758407125765,0.999999802160014,4,11,neurofilament cytoskeleton organization,BP,L5 ET,cells,goseq
GO:0048812,0.0000113058035302615,0.999996672198911,22,538,neuron projection morphogenesis,BP,L5 ET,cells,goseq
GO:1902600,0.0000116029409744549,0.999999039429549,7,65,proton transmembrane transport,BP,L5 ET,cells,goseq
GO:0070100,0.0000138878415483364,0.999999947331447,3,4,negative regulation of chemokine-mediated signaling pathway,BP,L5 ET,cells,goseq
GO:0050919,0.0000138927903622144,0.999999135494131,6,36,negative chemotaxis,BP,L5 ET,cells,goseq
GO:0015081,0.0000149695035127034,0.999998410333446,8,75,sodium ion transmembrane transporter activity,MF,L5 ET,cells,goseq
GO:0120039,0.0000151803156462337,0.999995440923952,22,548,plasma membrane bounded cell projection morphogenesis,BP,L5 ET,cells,goseq
GO:0048858,0.000016083334763083,0.999995150526021,22,550,cell projection morphogenesis,BP,L5 ET,cells,goseq
GO:0031224,6.14814159264819e-14,0.999999999999983,77,2512,intrinsic component of membrane,CC,L5 ET,cells,hypergeometric
GO:0022857,4.88460261599379e-12,0.999999999999069,33,595,transmembrane transporter activity,MF,L5 ET,cells,hypergeometric
GO:0016021,6.13742612645242e-12,0.999999999998139,72,2441,integral component of membrane,CC,L5 ET,cells,hypergeometric
GO:1902495,6.68636324050683e-12,0.999999999999168,22,256,transmembrane transporter complex,CC,L5 ET,cells,hypergeometric
GO:0015453,7.81383741651693e-12,0.999999999999736,11,42,oxidoreduction-driven active transmembrane transporter activity,MF,L5 ET,cells,hypergeometric
GO:1990351,1.54404125840735e-11,0.999999999997987,22,267,transporter complex,CC,L5 ET,cells,hypergeometric
GO:0043005,3.82282985730948e-11,0.999999999990098,45,1138,neuron projection,CC,L5 ET,cells,hypergeometric
GO:0009055,6.198793666206e-11,0.999999999997366,11,50,electron transfer activity,MF,L5 ET,cells,hypergeometric
GO:0005215,6.48147183393453e-11,0.999999999986266,33,655,transporter activity,MF,L5 ET,cells,hypergeometric
GO:0022904,4.20732081304883e-10,0.999999999973514,12,75,respiratory electron transport chain,BP,L5 ET,cells,hypergeometric
GO:0006119,5.02517369905045e-10,0.999999999962464,13,94,oxidative phosphorylation,BP,L5 ET,cells,hypergeometric
GO:0042773,6.08607974202314e-10,0.999999999966849,11,61,ATP synthesis coupled electron transport,BP,L5 ET,cells,hypergeometric
GO:0022900,9.1414867103444e-10,0.999999999937882,12,80,electron transport chain,BP,L5 ET,cells,hypergeometric
GO:0030054,4.11633774491542e-09,0.99999999871598,47,1411,cell junction,CC,L5 ET,cells,hypergeometric
GO:0016020,4.12563015004421e-09,0.999999998498126,100,4644,membrane,CC,L5 ET,cells,hypergeometric
GO:0007411,4.74707264643866e-09,0.999999999458348,15,158,axon guidance,BP,L5 ET,cells,hypergeometric
GO:0015399,5.10707716630154e-09,0.999999999528902,13,113,primary active transmembrane transporter activity,MF,L5 ET,cells,hypergeometric
GO:0097485,5.17956443401717e-09,0.999999999404849,15,159,neuron projection guidance,BP,L5 ET,cells,hypergeometric
GO:0015318,5.37664848132527e-09,0.999999998976305,23,396,inorganic molecular entity transmembrane transporter activity,MF,L5 ET,cells,hypergeometric
GO:0070469,8.03858205256053e-09,0.999999999422086,11,77,respirasome,CC,L5 ET,cells,hypergeometric
GO:0008137,8.72434640460038e-09,0.999999999795053,7,21,NADH dehydrogenase (ubiquinone) activity,MF,L5 ET,cells,hypergeometric
GO:0050136,8.72434640460038e-09,0.999999999795053,7,21,NADH dehydrogenase (quinone) activity,MF,L5 ET,cells,hypergeometric
GO:0046034,9.43667680257325e-09,0.999999998759209,16,192,ATP metabolic process,BP,L5 ET,cells,hypergeometric
GO:0045202,1.09041337384719e-08,0.999999996801793,39,1067,synapse,CC,L5 ET,cells,hypergeometric
GO:0120025,1.60212934617359e-08,0.999999994652751,49,1574,plasma membrane bounded cell projection,CC,L5 ET,cells,hypergeometric
GO:0007409,1.67281304307976e-08,0.999999996882506,21,352,axonogenesis,BP,L5 ET,cells,hypergeometric
GO:0003955,1.79692998305466e-08,0.999999999517682,7,23,NAD(P)H dehydrogenase (quinone) activity,MF,L5 ET,cells,hypergeometric
GO:0036477,1.81547413815719e-08,0.999999995088883,33,817,somatodendritic compartment,CC,L5 ET,cells,hypergeometric
GO:0015075,1.95893340152845e-08,0.99999999582705,24,460,ion transmembrane transporter activity,MF,L5 ET,cells,hypergeometric
GO:0019646,1.98086872015747e-08,0.999999998951115,9,49,aerobic electron transport chain,BP,L5 ET,cells,hypergeometric
GO:0007399,2.13777540603294e-08,0.999999992728883,50,1640,nervous system development,BP,L5 ET,cells,hypergeometric
GO:0003954,2.50740111599463e-08,0.999999999284999,7,24,NADH dehydrogenase activity,MF,L5 ET,cells,hypergeometric
GO:0008324,2.99766945056927e-08,0.999999994207147,21,364,cation transmembrane transporter activity,MF,L5 ET,cells,hypergeometric
GO:0009060,3.11702585609248e-08,0.999999996606368,13,131,aerobic respiration,BP,L5 ET,cells,hypergeometric
GO:0098803,3.42167402907901e-08,0.999999997586447,10,69,respiratory chain complex,CC,L5 ET,cells,hypergeometric
GO:0016655,3.44209004490616e-08,0.999999998960847,7,25,"oxidoreductase activity, acting on NAD(P)H, quinone or similar compound as acceptor",MF,L5 ET,cells,hypergeometric
GO:0022008,3.46368866715649e-08,0.999999988928377,42,1257,neurogenesis,BP,L5 ET,cells,hypergeometric
GO:0043025,3.91933437356234e-08,0.999999990729818,26,553,neuronal cell body,CC,L5 ET,cells,hypergeometric
GO:0022890,3.93601467823213e-08,0.999999992621498,20,336,inorganic cation transmembrane transporter activity,MF,L5 ET,cells,hypergeometric
GO:0042995,4.45577227471571e-08,0.99999998431631,51,1730,cell projection,CC,L5 ET,cells,hypergeometric
GO:0048699,4.92350064972393e-08,0.999999984431044,40,1175,generation of neurons,BP,L5 ET,cells,hypergeometric
GO:0022804,5.36092601111441e-08,0.999999991942995,16,217,active transmembrane transporter activity,MF,L5 ET,cells,hypergeometric
GO:0045333,6.17516952961083e-08,0.999999992066575,14,164,cellular respiration,BP,L5 ET,cells,hypergeometric
GO:0061564,7.18830862261712e-08,0.999999985324453,21,383,axon development,BP,L5 ET,cells,hypergeometric
GO:0042775,1.0762729296333e-07,0.99999999287977,9,59,mitochondrial ATP synthesis coupled electron transport,BP,L5 ET,cells,hypergeometric
GO:0005883,1.16797899993687e-07,0.999999998675422,5,10,neurofilament,CC,L5 ET,cells,hypergeometric
GO:0098796,1.19900377900491e-07,0.999999965963811,31,795,membrane protein complex,CC,L5 ET,cells,hypergeometric
GO:0015988,1.78841518938222e-07,0.999999999509618,4,5,"energy coupled proton transmembrane transport, against electrochemical gradient",BP,L5 ET,cells,hypergeometric
GO:0015990,1.78841518938222e-07,0.999999999509618,4,5,electron transport coupled proton transport,BP,L5 ET,cells,hypergeometric
GO:0006811,2.04948952966932e-07,0.999999939093417,32,859,ion transport,BP,L5 ET,cells,hypergeometric
GO:0098660,2.54453041086088e-07,0.999999941418503,22,450,inorganic ion transmembrane transport,BP,L5 ET,cells,hypergeometric
GO:0030424,3.10417526465777e-07,0.999999920066823,25,573,axon,CC,L5 ET,cells,hypergeometric
GO:0044297,3.52781877848189e-07,0.999999905869278,26,618,cell body,CC,L5 ET,cells,hypergeometric
GO:0030182,3.58851050801583e-07,0.999999882980368,36,1068,neuron differentiation,BP,L5 ET,cells,hypergeometric
GO:0006812,5.21084685554311e-07,0.999999854175163,27,673,cation transport,BP,L5 ET,cells,hypergeometric
GO:0005886,6.33869130824118e-07,0.999999739211204,62,2513,plasma membrane,CC,L5 ET,cells,hypergeometric
GO:0006935,6.69385718412558e-07,0.999999869501974,17,294,chemotaxis,BP,L5 ET,cells,hypergeometric
GO:0071944,7.08998942558233e-07,0.999999703973489,65,2702,cell periphery,CC,L5 ET,cells,hypergeometric
GO:0042330,7.71334255960813e-07,0.999999847982623,17,297,taxis,BP,L5 ET,cells,hypergeometric
GO:0031226,8.00663573726802e-07,0.999999776235841,26,645,intrinsic component of plasma membrane,CC,L5 ET,cells,hypergeometric
GO:0098742,9.09610377929301e-07,0.99999989107342,11,121,cell-cell adhesion via plasma-membrane adhesion molecules,BP,L5 ET,cells,hypergeometric
GO:0034220,9.52923521716777e-07,0.999999745547013,24,567,ion transmembrane transport,BP,L5 ET,cells,hypergeometric
GO:0031175,9.8497622139964e-07,0.99999969521537,30,829,neuron projection development,BP,L5 ET,cells,hypergeometric
GO:0048666,0.00000102228570379358,0.999999671130274,32,923,neuron development,BP,L5 ET,cells,hypergeometric
GO:0016651,0.00000112075469277536,0.999999938077646,7,40,"oxidoreductase activity, acting on NAD(P)H",MF,L5 ET,cells,hypergeometric
GO:0098794,0.000001149927487934,0.999999698842312,23,532,postsynapse,CC,L5 ET,cells,hypergeometric
GO:0005216,0.00000190477688717459,0.999999643529175,15,249,ion channel activity,MF,L5 ET,cells,hypergeometric
GO:0015980,0.00000212713566466545,0.999999626183296,14,219,energy derivation by oxidation of organic compounds,BP,L5 ET,cells,hypergeometric
GO:0098655,0.00000225163163150438,0.999999424681363,21,472,cation transmembrane transport,BP,L5 ET,cells,hypergeometric
GO:0006120,0.00000240773793390399,0.999999893335678,6,29,"mitochondrial electron transport, NADH to ubiquinone",BP,L5 ET,cells,hypergeometric
GO:0098609,0.00000257362543371693,0.999999386906704,19,398,cell-cell adhesion,BP,L5 ET,cells,hypergeometric
GO:0007155,0.00000260822229777667,0.999999219568035,26,687,cell adhesion,BP,L5 ET,cells,hypergeometric
GO:0033693,0.00000264858012470354,1,3,3,neurofilament bundle assembly,BP,L5 ET,cells,hypergeometric
GO:0099160,0.00000264858012470354,1,3,3,postsynaptic intermediate filament cytoskeleton,CC,L5 ET,cells,hypergeometric
GO:0099184,0.00000264858012470354,1,3,3,structural constituent of postsynaptic intermediate filament cytoskeleton,MF,L5 ET,cells,hypergeometric
GO:0022610,0.00000275179795691304,0.999999174014148,26,689,biological adhesion,BP,L5 ET,cells,hypergeometric
GO:0015267,0.00000341239185420968,0.999999328475637,15,261,channel activity,MF,L5 ET,cells,hypergeometric
GO:0022803,0.00000341239185420968,0.999999328475637,15,261,passive transmembrane transporter activity,MF,L5 ET,cells,hypergeometric
GO:0005746,0.00000382308543922043,0.999999666856221,8,67,mitochondrial respirasome,CC,L5 ET,cells,hypergeometric
GO:0098800,0.00000401330566637996,0.99999950173092,10,114,inner mitochondrial membrane protein complex,CC,L5 ET,cells,hypergeometric
GO:0007420,0.00000422557471331853,0.999998913665056,20,451,brain development,BP,L5 ET,cells,hypergeometric
GO:0048667,0.00000461076200734273,0.999998763120831,21,494,cell morphogenesis involved in neuron differentiation,BP,L5 ET,cells,hypergeometric
GO:0098662,0.00000490938023947257,0.999998774041891,19,416,inorganic cation transmembrane transport,BP,L5 ET,cells,hypergeometric
GO:0048812,0.00000500069666835776,0.999998605547814,22,538,neuron projection morphogenesis,BP,L5 ET,cells,hypergeometric
GO:0050922,0.00000536186196512585,0.999999721354334,6,33,negative regulation of chemotaxis,BP,L5 ET,cells,hypergeometric
GO:0005615,0.00000583441205502618,0.999998524403365,19,421,extracellular space,CC,L5 ET,cells,hypergeometric
GO:0005576,0.00000661778731896488,0.999997956532157,25,678,extracellular region,CC,L5 ET,cells,hypergeometric
GO:0120039,0.00000671653316367097,0.999998089830159,22,548,plasma membrane bounded cell projection morphogenesis,BP,L5 ET,cells,hypergeometric
GO:0048858,0.00000711809882611937,0.999997967726051,22,550,cell projection morphogenesis,BP,L5 ET,cells,hypergeometric
GO:0015081,0.00000900236139321398,0.999999109795839,8,75,sodium ion transmembrane transporter activity,MF,L5 ET,cells,hypergeometric
GO:0050919,0.00000911030852021598,0.999999474234393,6,36,negative chemotaxis,BP,L5 ET,cells,hypergeometric
GO:0005887,0.000010200600370432,0.999996927933016,23,606,integral component of plasma membrane,CC,L5 ET,cells,hypergeometric
GO:0045110,0.0000104858386714719,0.999999963839391,3,4,intermediate filament bundle assembly,BP,L5 ET,cells,hypergeometric
GO:0070100,0.0000104858386714719,0.999999963839391,3,4,negative regulation of chemokine-mediated signaling pathway,BP,L5 ET,cells,hypergeometric
GO:0034703,0.0000109248078834925,0.999998276771434,11,156,cation channel complex,CC,L5 ET,cells,hypergeometric
GO:0060052,0.0000110567154110251,0.999999788271081,4,11,neurofilament cytoskeleton organization,BP,L5 ET,cells,hypergeometric
GO:0009605,0.00001211532686545,0.999995440316108,34,1138,response to external stimulus,BP,L5 ET,cells,hypergeometric
GO:0032990,0.0000125149356430511,0.999996287894149,22,570,cell part morphogenesis,BP,L5 ET,cells,hypergeometric
GO:0032989,0.0000129546423909237,0.999996036437667,23,615,cellular component morphogenesis,BP,L5 ET,cells,hypergeometric
GO:0034702,0.0000132535595284262,0.999997643285275,12,190,ion channel complex,CC,L5 ET,cells,hypergeometric
GO:0031224,0.000012271020989679,0.999994568738737,64,2434,intrinsic component of membrane,CC,L5 ET,nuclei,goseq
GO:0016021,0.0000262397257778518,0.99998808715009,61,2370,integral component of membrane,CC,L5 ET,nuclei,goseq
GO:1900076,0.0000831519492324681,0.999992608217395,6,54,regulation of cellular response to insulin stimulus,BP,L5 ET,nuclei,goseq
GO:0016342,0.000351516359964693,0.999963788436984,6,21,catenin complex,CC,L5 ET,nuclei,goseq
GO:0007156,0.000434348923315629,0.999908582017408,10,64,homophilic cell adhesion via plasma membrane adhesion molecules,BP,L5 ET,nuclei,goseq
GO:0046626,0.000706687679762811,0.999926703069721,5,53,regulation of insulin receptor signaling pathway,BP,L5 ET,nuclei,goseq
GO:0046628,0.000825242505078927,0.999968180578888,3,18,positive regulation of insulin receptor signaling pathway,BP,L5 ET,nuclei,goseq
GO:0007411,0.00102238738306347,0.999696009753846,13,151,axon guidance,BP,L5 ET,nuclei,goseq
GO:0097485,0.00102702415221665,0.999694403107272,13,152,neuron projection guidance,BP,L5 ET,nuclei,goseq
GO:0086037,0.00116698006591888,1,1,1,P-type sodium:potassium-exchanging transporter activity involved in regulation of cardiac muscle cell membrane potential,MF,L5 ET,nuclei,goseq
GO:0099520,0.00116698006591888,1,1,1,ion antiporter activity involved in regulation of presynaptic membrane potential,MF,L5 ET,nuclei,goseq
GO:1900078,0.00134875110251333,0.999937119536187,3,21,positive regulation of cellular response to insulin stimulus,BP,L5 ET,nuclei,goseq
GO:0071679,0.00145064962191366,0.999939512082906,3,10,commissural neuron axon guidance,BP,L5 ET,nuclei,goseq
GO:0098742,0.00175834234357017,0.99942506417338,14,119,cell-cell adhesion via plasma-membrane adhesion molecules,BP,L5 ET,nuclei,goseq
GO:0015111,0.00189917144383974,1,1,1,iodide transmembrane transporter activity,MF,L5 ET,nuclei,goseq
GO:0019897,0.00211237217840862,0.999524552775283,8,106,extrinsic component of plasma membrane,CC,L5 ET,nuclei,goseq
GO:0016020,0.00213783114844001,0.998819954515662,85,4491,membrane,CC,L5 ET,nuclei,goseq
GO:0016339,0.00308336209130897,0.99960084419663,5,19,calcium-dependent cell-cell adhesion via plasma membrane cell adhesion molecules,BP,L5 ET,nuclei,goseq
GO:0005886,0.00334398013158696,0.998079098767852,65,2446,plasma membrane,CC,L5 ET,nuclei,goseq
GO:0045296,0.00337669376860899,0.999299728056525,7,47,cadherin binding,MF,L5 ET,nuclei,goseq
GO:1902946,0.00385765085894005,0.999908038478554,2,8,protein localization to early endosome,BP,L5 ET,nuclei,goseq
GO:0043005,0.00456713648234875,0.997528630929818,38,1101,neuron projection,CC,L5 ET,nuclei,goseq
GO:0030193,0.00481763744623531,0.999653868194765,3,18,regulation of blood coagulation,BP,L5 ET,nuclei,goseq
GO:1900046,0.00481763744623531,0.999653868194765,3,18,regulation of hemostasis,BP,L5 ET,nuclei,goseq
GO:0071944,0.0050199411385923,0.997046167460882,68,2627,cell periphery,CC,L5 ET,nuclei,goseq
GO:1990791,0.00544169082151923,0.999887733948327,2,4,dorsal root ganglion development,BP,L5 ET,nuclei,goseq
GO:0048535,0.00583515893845719,0.999816016720639,2,11,lymph node development,BP,L5 ET,nuclei,goseq
GO:0007409,0.0066602831989314,0.997149184880864,17,340,axonogenesis,BP,L5 ET,nuclei,goseq
GO:0005890,0.0070255519068498,0.999979540254644,1,6,sodium:potassium-exchanging ATPase complex,CC,L5 ET,nuclei,goseq
GO:0008271,0.00708899316125948,0.999983328210208,1,3,secondary active sulfate transmembrane transporter activity,MF,L5 ET,nuclei,goseq
GO:0019531,0.00708899316125948,0.999983328210208,1,3,oxalate transmembrane transporter activity,MF,L5 ET,nuclei,goseq
GO:0032102,0.00760137399853079,0.997853213152205,8,176,negative regulation of response to external stimulus,BP,L5 ET,nuclei,goseq
GO:0036010,0.00767314558062523,0.999699489991327,2,21,protein localization to endosome,BP,L5 ET,nuclei,goseq
GO:0042628,0.00771095190306508,1,1,1,mating plug formation,BP,L5 ET,nuclei,goseq
GO:0061107,0.00771095190306508,1,1,1,seminal vesicle development,BP,L5 ET,nuclei,goseq
GO:0061108,0.00771095190306508,1,1,1,seminal vesicle epithelium development,BP,L5 ET,nuclei,goseq
GO:0050818,0.00811942959909032,0.999282258064969,3,21,regulation of coagulation,BP,L5 ET,nuclei,goseq
GO:0008286,0.00825955765650324,0.998454480513028,5,87,insulin receptor signaling pathway,BP,L5 ET,nuclei,goseq
GO:0018242,0.00834197631766973,0.999750880526976,2,5,protein O-linked glycosylation via serine,BP,L5 ET,nuclei,goseq
GO:0036145,0.00846942140366077,1,1,1,dendritic cell homeostasis,BP,L5 ET,nuclei,goseq
GO:0050919,0.00860051502524013,0.998455965382643,5,34,negative chemotaxis,BP,L5 ET,nuclei,goseq
GO:0010757,0.0088597881699143,0.999980443825746,1,2,negative regulation of plasminogen activation,BP,L5 ET,nuclei,goseq
GO:0005391,0.00888345674606772,0.999967264322374,1,6,P-type sodium:potassium-exchanging transporter activity,MF,L5 ET,nuclei,goseq
GO:0008554,0.00888345674606772,0.999967264322374,1,6,P-type sodium transporter activity,MF,L5 ET,nuclei,goseq
GO:0008556,0.00888345674606772,0.999967264322374,1,6,P-type potassium transmembrane transporter activity,MF,L5 ET,nuclei,goseq
GO:0048513,0.00903882174417601,0.994740601974599,43,1774,animal organ development,BP,L5 ET,nuclei,goseq
GO:0005221,0.0093984417931141,0.999741903068574,2,4,intracellular cyclic nucleotide activated cation channel activity,MF,L5 ET,nuclei,goseq
GO:0043855,0.0093984417931141,0.999741903068574,2,4,cyclic nucleotide-gated ion channel activity,MF,L5 ET,nuclei,goseq
GO:0060219,0.00955340701404339,0.999119599426398,3,18,camera-type eye photoreceptor cell differentiation,BP,L5 ET,nuclei,goseq
GO:0045578,0.00958540314913887,0.999977100927118,1,2,negative regulation of B cell differentiation,BP,L5 ET,nuclei,goseq
GO:0002572,0.00962140005606366,0.999976928192815,1,2,pro-T cell differentiation,BP,L5 ET,nuclei,goseq
GO:0061564,0.00994115038487032,0.995552514008552,17,367,axon development,BP,L5 ET,nuclei,goseq
GO:0050922,0.010036923482412,0.998533990700019,4,32,negative regulation of chemotaxis,BP,L5 ET,nuclei,goseq
GO:0005912,0.0102272830665917,0.997005542242974,8,99,adherens junction,CC,L5 ET,nuclei,goseq
GO:0007596,0.0102408958347667,0.998452763203173,4,50,blood coagulation,BP,L5 ET,nuclei,goseq
GO:0007599,0.0103760998896133,0.998423434098456,4,52,hemostasis,BP,L5 ET,nuclei,goseq
GO:0004416,0.0104831037259226,0.999963486170223,1,3,hydroxyacylglutathione hydrolase activity,MF,L5 ET,nuclei,goseq
GO:0019243,0.0104831037259226,0.999963486170223,1,3,methylglyoxal catabolic process to D-lactate via S-lactoyl-glutathione,BP,L5 ET,nuclei,goseq
GO:0035726,0.0107682240987925,0.999961467987943,1,3,common myeloid progenitor cell proliferation,BP,L5 ET,nuclei,goseq
GO:0008272,0.0110992596052521,0.999948852407758,1,6,sulfate transport,BP,L5 ET,nuclei,goseq
GO:0015116,0.0110992596052521,0.999948852407758,1,6,sulfate transmembrane transporter activity,MF,L5 ET,nuclei,goseq
GO:0031232,0.0111038251651615,0.999953914810319,1,4,extrinsic component of external side of plasma membrane,CC,L5 ET,nuclei,goseq
GO:0032869,0.0113412338894112,0.997255872847202,6,142,cellular response to insulin stimulus,BP,L5 ET,nuclei,goseq
GO:0030308,0.0113599757882763,0.997255962817033,6,129,negative regulation of cell growth,BP,L5 ET,nuclei,goseq
GO:0005496,0.0116165925804543,0.998167184528808,4,58,steroid binding,MF,L5 ET,nuclei,goseq
GO:0051596,0.0116312367548286,0.999949421620166,1,4,methylglyoxal catabolic process,BP,L5 ET,nuclei,goseq
GO:0061727,0.0116312367548286,0.999949421620166,1,4,methylglyoxal catabolic process to lactate,BP,L5 ET,nuclei,goseq
GO:0015662,0.0116445055630287,0.999440796380589,2,18,P-type ion transporter activity,MF,L5 ET,nuclei,goseq
GO:0140358,0.0116445055630287,0.999440796380589,2,18,P-type transmembrane transporter activity,MF,L5 ET,nuclei,goseq
GO:0050771,0.0118989274731255,0.997598996969556,5,60,negative regulation of axonogenesis,BP,L5 ET,nuclei,goseq
GO:0010755,0.0124079973299167,0.999938595939984,1,5,regulation of plasminogen activation,BP,L5 ET,nuclei,goseq
GO:0048846,0.0124949682290939,0.998082650421348,4,27,axon extension involved in axon guidance,BP,L5 ET,nuclei,goseq
GO:1902284,0.0124949682290939,0.998082650421348,4,27,neuron projection extension involved in neuron projection guidance,BP,L5 ET,nuclei,goseq
GO:0048699,0.0126787909084564,0.992661284085391,37,1122,generation of neurons,BP,L5 ET,nuclei,goseq
GO:2000249,0.0127130355747371,0.998652472330885,3,25,regulation of actin cytoskeleton reorganization,BP,L5 ET,nuclei,goseq
GO:0009438,0.0127609610185505,0.999935043469704,1,5,methylglyoxal metabolic process,BP,L5 ET,nuclei,goseq
GO:0043368,0.0129071008358477,0.999376309817876,2,12,positive T cell selection,BP,L5 ET,nuclei,goseq
GO:0050817,0.013425089839454,0.997798363460124,4,53,coagulation,BP,L5 ET,nuclei,goseq
GO:0048505,0.0139886258223487,0.999404464754786,2,6,regulation of timing of cell differentiation,BP,L5 ET,nuclei,goseq
GO:0090533,0.0146218297707509,0.999906686280868,1,8,cation-transporting ATPase complex,CC,L5 ET,nuclei,goseq
GO:0098533,0.0146218297707509,0.999906686280868,1,8,ATPase dependent transmembrane transport complex,CC,L5 ET,nuclei,goseq
GO:0002836,0.0147072483123214,0.999919026619167,1,4,positive regulation of response to tumor cell,BP,L5 ET,nuclei,goseq
GO:0002839,0.0147072483123214,0.999919026619167,1,4,positive regulation of immune response to tumor cell,BP,L5 ET,nuclei,goseq
GO:0030169,0.0149049624357142,0.999395417552644,2,5,low-density lipoprotein particle binding,MF,L5 ET,nuclei,goseq
GO:0040034,0.0149727821158464,0.999277011142565,2,8,"regulation of development, heterochronic",BP,L5 ET,nuclei,goseq
GO:0046185,0.0150507647613766,0.999903124277471,1,7,aldehyde catabolic process,BP,L5 ET,nuclei,goseq
GO:0071678,0.0151129240277311,1,1,1,olfactory bulb axon guidance,BP,L5 ET,nuclei,goseq
GO:0097534,0.0151129240277311,1,1,1,lymphoid lineage cell migration,BP,L5 ET,nuclei,goseq
GO:0097535,0.0151129240277311,1,1,1,lymphoid lineage cell migration into thymus,BP,L5 ET,nuclei,goseq
GO:0006883,0.0152190283616179,0.999197992478761,2,12,cellular sodium ion homeostasis,BP,L5 ET,nuclei,goseq
GO:0005615,0.0152460179622636,0.99381971551342,12,410,extracellular space,CC,L5 ET,nuclei,goseq
GO:0048843,0.0152491721259093,0.998317229796219,3,19,negative regulation of axon extension involved in axon guidance,BP,L5 ET,nuclei,goseq
GO:0006935,0.0157995653640221,0.993131322671812,14,285,chemotaxis,BP,L5 ET,nuclei,goseq
GO:0031639,0.0158509495466133,0.999890287397872,1,8,plasminogen activation,BP,L5 ET,nuclei,goseq
GO:0042330,0.0159928116915898,0.993035398028044,14,288,taxis,BP,L5 ET,nuclei,goseq
GO:0010977,0.0161965898239698,0.995256489291757,7,126,negative regulation of neuron projection development,BP,L5 ET,nuclei,goseq
GO:0022008,0.0162747965289697,0.99034899659176,38,1194,neurogenesis,BP,L5 ET,nuclei,goseq
GO:0045058,0.0164606937426822,0.999062844106922,2,16,T cell selection,BP,L5 ET,nuclei,goseq
GO:0034332,0.0169293982338117,0.997056580220539,4,43,adherens junction organization,BP,L5 ET,nuclei,goseq
GO:0032868,0.0169533991282666,0.995511175783679,6,162,response to insulin,BP,L5 ET,nuclei,goseq
GO:0071944,9.7320682111875e-12,0.999999999997239,68,2627,cell periphery,CC,L5 ET,nuclei,hypergeometric
GO:0005886,1.31663857024892e-11,0.99999999999627,65,2446,plasma membrane,CC,L5 ET,nuclei,hypergeometric
GO:0031224,3.59708371680607e-11,0.999999999989555,64,2434,intrinsic component of membrane,CC,L5 ET,nuclei,hypergeometric
GO:0098742,1.69419778206042e-10,0.999999999986836,14,119,cell-cell adhesion via plasma-membrane adhesion molecules,BP,L5 ET,nuclei,hypergeometric
GO:0016021,3.95697980576656e-10,0.999999999878204,61,2370,integral component of membrane,CC,L5 ET,nuclei,hypergeometric
GO:0043005,1.69047320103288e-09,0.99999999955708,38,1101,neuron projection,CC,L5 ET,nuclei,hypergeometric
GO:0007156,4.68395607907271e-09,0.999999999737042,10,64,homophilic cell adhesion via plasma membrane adhesion molecules,BP,L5 ET,nuclei,hypergeometric
GO:0030054,5.20144888677852e-09,0.999999998494333,42,1361,cell junction,CC,L5 ET,nuclei,hypergeometric
GO:0048699,1.03804592211511e-08,0.999999997115842,37,1122,generation of neurons,BP,L5 ET,nuclei,hypergeometric
GO:0022008,1.62251857625996e-08,0.999999995337612,38,1194,neurogenesis,BP,L5 ET,nuclei,hypergeometric
GO:0007411,3.68408231120732e-08,0.999999995933783,13,151,axon guidance,BP,L5 ET,nuclei,hypergeometric
GO:0097485,3.98717937768737e-08,0.999999995567248,13,152,neuron projection guidance,BP,L5 ET,nuclei,hypergeometric
GO:0030182,4.02383235823428e-08,0.999999988711022,34,1022,neuron differentiation,BP,L5 ET,nuclei,hypergeometric
GO:0045202,4.87834312493615e-08,0.999999986193373,34,1030,synapse,CC,L5 ET,nuclei,hypergeometric
GO:0048666,6.70453518457026e-08,0.999999981797303,31,890,neuron development,BP,L5 ET,nuclei,hypergeometric
GO:0016020,7.06371181438365e-08,0.999999974138928,85,4491,membrane,CC,L5 ET,nuclei,hypergeometric
GO:0016342,1.41402168867438e-07,0.99999999642576,6,21,catenin complex,CC,L5 ET,nuclei,hypergeometric
GO:0007399,2.75747514042395e-07,0.999999906378169,42,1560,nervous system development,BP,L5 ET,nuclei,hypergeometric
GO:0031175,3.3002208665673e-07,0.999999908970215,28,803,neuron projection development,BP,L5 ET,nuclei,hypergeometric
GO:0007155,5.56161044872924e-07,0.999999853652369,25,677,cell adhesion,BP,L5 ET,nuclei,hypergeometric
GO:0022610,5.8760884764855e-07,0.999999844881294,25,679,biological adhesion,BP,L5 ET,nuclei,hypergeometric
GO:0007409,8.08708563706789e-07,0.999999841093508,17,340,axonogenesis,BP,L5 ET,nuclei,hypergeometric
GO:0098609,9.18896828940502e-07,0.999999807730055,18,383,cell-cell adhesion,BP,L5 ET,nuclei,hypergeometric
GO:0007275,0.00000146145030862833,0.999999405874653,62,2986,multicellular organism development,BP,L5 ET,nuclei,hypergeometric
GO:0045296,0.0000014834858141161,0.99999991333096,7,47,cadherin binding,MF,L5 ET,nuclei,hypergeometric
GO:0009653,0.0000016151872127783,0.999999413781933,41,1603,anatomical structure morphogenesis,BP,L5 ET,nuclei,hypergeometric
GO:0120025,0.00000168045497859873,0.999999395036791,40,1545,plasma membrane bounded cell projection,CC,L5 ET,nuclei,hypergeometric
GO:0061564,0.00000231444904904047,0.999999506623681,17,367,axon development,BP,L5 ET,nuclei,hypergeometric
GO:0016339,0.00000260261518577253,0.999999927861894,5,19,calcium-dependent cell-cell adhesion via plasma membrane cell adhesion molecules,BP,L5 ET,nuclei,hypergeometric
GO:0042995,0.00000272678666437357,0.999998977447877,42,1697,cell projection,CC,L5 ET,nuclei,hypergeometric
GO:0048513,0.00000341837896103575,0.99999869393643,43,1774,animal organ development,BP,L5 ET,nuclei,hypergeometric
GO:0032501,0.00000363617095726764,0.99999845126381,71,3729,multicellular organismal process,BP,L5 ET,nuclei,hypergeometric
GO:0048731,0.00000513287766550126,0.999997849580349,56,2665,system development,BP,L5 ET,nuclei,hypergeometric
GO:0048812,0.00000543699789972609,0.999998589343659,20,524,neuron projection morphogenesis,BP,L5 ET,nuclei,hypergeometric
GO:0031226,0.00000552045806543805,0.999998465683001,22,619,intrinsic component of plasma membrane,CC,L5 ET,nuclei,hypergeometric
GO:0048667,0.00000569583760970853,0.999998573580082,19,480,cell morphogenesis involved in neuron differentiation,BP,L5 ET,nuclei,hypergeometric
GO:0120039,0.00000741615590612321,0.999998032695284,20,535,plasma membrane bounded cell projection morphogenesis,BP,L5 ET,nuclei,hypergeometric
GO:0048858,0.00000805889206570081,0.999997849400886,20,538,cell projection morphogenesis,BP,L5 ET,nuclei,hypergeometric
GO:0000902,0.00000862107172805737,0.999997325080983,25,788,cell morphogenesis,BP,L5 ET,nuclei,hypergeometric
GO:0098590,0.00000992477896385999,0.999997047192078,23,692,plasma membrane region,CC,L5 ET,nuclei,hypergeometric
GO:0006935,0.00000996703950508109,0.999997991118677,14,285,chemotaxis,BP,L5 ET,nuclei,hypergeometric
GO:0042330,0.0000112260769592752,0.999997712158381,14,288,taxis,BP,L5 ET,nuclei,hypergeometric
GO:0032989,0.0000123637095531641,0.999996481047329,21,602,cellular component morphogenesis,BP,L5 ET,nuclei,hypergeometric
GO:0032990,0.0000130930029862695,0.99999638118011,20,556,cell part morphogenesis,BP,L5 ET,nuclei,hypergeometric
GO:0007420,0.0000148143884057473,0.999996337444239,17,422,brain development,BP,L5 ET,nuclei,hypergeometric
GO:0097060,0.0000198811957921705,0.999995725117753,14,303,synaptic membrane,CC,L5 ET,nuclei,hypergeometric
GO:0050808,0.0000209254394514434,0.99999492803127,16,389,synapse organization,BP,L5 ET,nuclei,hypergeometric
GO:0048856,0.000021929986027698,0.999990085875213,62,3222,anatomical structure development,BP,L5 ET,nuclei,hypergeometric
GO:0048468,0.0000220691611274587,0.999991465588342,35,1404,cell development,BP,L5 ET,nuclei,hypergeometric
GO:0000904,0.0000230033932844066,0.999993373594383,20,578,cell morphogenesis involved in differentiation,BP,L5 ET,nuclei,hypergeometric
GO:0120036,0.000026028895389996,0.999990499781283,30,1119,plasma membrane bounded cell projection organization,BP,L5 ET,nuclei,hypergeometric
GO:0005887,0.0000260345626219458,0.999992431320804,20,583,integral component of plasma membrane,CC,L5 ET,nuclei,hypergeometric
GO:0034330,0.00002707647183881,0.999992374952498,19,536,cell junction organization,BP,L5 ET,nuclei,hypergeometric
GO:0036477,0.0000275936735550888,0.999990990018554,24,790,somatodendritic compartment,CC,L5 ET,nuclei,hypergeometric
GO:0005912,0.0000276921447400245,0.999996760366701,8,99,adherens junction,CC,L5 ET,nuclei,hypergeometric
GO:0099240,0.0000369165646169777,0.999995492657235,8,103,intrinsic component of synaptic membrane,CC,L5 ET,nuclei,hypergeometric
GO:0050839,0.0000376741547215802,0.999993861443086,10,167,cell adhesion molecule binding,MF,L5 ET,nuclei,hypergeometric
GO:0060322,0.0000398963171246959,0.999989294632115,17,456,head development,BP,L5 ET,nuclei,hypergeometric
GO:0030030,0.0000416735985652024,0.999984365921475,30,1147,cell projection organization,BP,L5 ET,nuclei,hypergeometric
GO:0034329,0.0000425002869987852,0.9999908011574,13,283,cell junction assembly,BP,L5 ET,nuclei,hypergeometric
GO:0019897,0.0000454103814931891,0.999994281741274,8,106,extrinsic component of plasma membrane,CC,L5 ET,nuclei,hypergeometric
GO:0007417,0.0000481077909285166,0.999985834702458,19,559,central nervous system development,BP,L5 ET,nuclei,hypergeometric
GO:1900076,0.0000483266518799834,0.999996109554669,6,54,regulation of cellular response to insulin stimulus,BP,L5 ET,nuclei,hypergeometric
GO:0050919,0.0000537390581986853,0.999996924664307,5,34,negative chemotaxis,BP,L5 ET,nuclei,hypergeometric
GO:0032502,0.0000568035455790456,0.99997318047751,64,3464,developmental process,BP,L5 ET,nuclei,hypergeometric
GO:0038023,0.0000599295539144156,0.99998567864853,14,335,signaling receptor activity,MF,L5 ET,nuclei,hypergeometric
GO:0060089,0.0000599295539144156,0.99998567864853,14,335,molecular transducer activity,MF,L5 ET,nuclei,hypergeometric
GO:0099173,0.0000617510550217251,0.99998930057188,10,177,postsynapse organization,BP,L5 ET,nuclei,hypergeometric
GO:0098797,0.0000799559677333733,0.99998153778413,13,301,plasma membrane protein complex,CC,L5 ET,nuclei,hypergeometric
GO:0004888,0.0000842244932280223,0.999981797606062,12,261,transmembrane signaling receptor activity,MF,L5 ET,nuclei,hypergeometric
GO:0009986,0.000108141537029429,0.999972619880452,14,354,cell surface,CC,L5 ET,nuclei,hypergeometric
GO:0009887,0.000109330698826813,0.999966799433496,18,544,animal organ morphogenesis,BP,L5 ET,nuclei,hypergeometric
GO:0030424,0.000153941523373683,0.999951892209072,18,559,axon,CC,L5 ET,nuclei,hypergeometric
GO:0099536,0.000157417144869669,0.999950713301672,18,560,synaptic signaling,BP,L5 ET,nuclei,hypergeometric
GO:0070161,0.000167262889880479,0.999955774011906,14,369,anchoring junction,CC,L5 ET,nuclei,hypergeometric
GO:0015276,0.000178045876367396,0.999981526873743,6,68,ligand-gated ion channel activity,MF,L5 ET,nuclei,hypergeometric
GO:0010975,0.000178716385549838,0.999949937995896,15,418,regulation of neuron projection development,BP,L5 ET,nuclei,hypergeometric
GO:0040011,0.000190621277583338,0.999926214079352,26,1008,locomotion,BP,L5 ET,nuclei,hypergeometric
GO:0071679,0.000203205408722572,0.999995713745295,3,10,commissural neuron axon guidance,BP,L5 ET,nuclei,hypergeometric
GO:0022834,0.00020906570114979,0.999977615922177,6,70,ligand-gated channel activity,MF,L5 ET,nuclei,hypergeometric
GO:0006928,0.000212177214691837,0.999913303324242,29,1193,movement of cell or subcellular component,BP,L5 ET,nuclei,hypergeometric
GO:0045211,0.0002252960377621,0.999953996561113,10,207,postsynaptic membrane,CC,L5 ET,nuclei,hypergeometric
GO:0030425,0.000232942506036916,0.99992459540674,18,578,dendrite,CC,L5 ET,nuclei,hypergeometric
GO:0098978,0.000233953237287802,0.999943357127304,12,291,glutamatergic synapse,CC,L5 ET,nuclei,hypergeometric
GO:0008038,0.000235348404060306,0.999981010750835,5,46,neuron recognition,BP,L5 ET,nuclei,hypergeometric
GO:0097447,0.000248219969510913,0.999919211022199,18,581,dendritic tree,CC,L5 ET,nuclei,hypergeometric
GO:0043025,0.000255098357152314,0.999919654702067,17,531,neuronal cell body,CC,L5 ET,nuclei,hypergeometric
GO:0005509,0.000273607141521414,0.999932572323929,12,296,calcium ion binding,MF,L5 ET,nuclei,hypergeometric
GO:0099537,0.000303938618930871,0.999902759108566,17,539,trans-synaptic signaling,BP,L5 ET,nuclei,hypergeometric
GO:0048846,0.000304722774931452,0.999983298755786,4,27,axon extension involved in axon guidance,BP,L5 ET,nuclei,hypergeometric
GO:1902284,0.000304722774931452,0.999983298755786,4,27,neuron projection extension involved in neuron projection guidance,BP,L5 ET,nuclei,hypergeometric
GO:0007169,0.000308825011394771,0.999917783217797,13,345,transmembrane receptor protein tyrosine kinase signaling pathway,BP,L5 ET,nuclei,hypergeometric
GO:0006811,0.000369244335195264,0.999861482727692,22,819,ion transport,BP,L5 ET,nuclei,hypergeometric
GO:0055085,0.000369489806275266,0.999864589980605,21,763,transmembrane transport,BP,L5 ET,nuclei,hypergeometric
GO:0070100,0.000444389457328017,0.999998196331928,2,3,negative regulation of chemokine-mediated signaling pathway,BP,L5 ET,nuclei,hypergeometric
GO:0046626,0.000460094137682475,0.999956610704403,5,53,regulation of insulin receptor signaling pathway,BP,L5 ET,nuclei,hypergeometric
GO:0030902,0.00046658386794587,0.999928269659936,7,113,hindbrain development,BP,L5 ET,nuclei,hypergeometric
GO:0032879,0.000486238470517564,0.999774179995849,36,1700,regulation of localization,BP,L5 ET,nuclei,hypergeometric
GO:0030154,0.000508132099589452,0.999748967942984,45,2314,cell differentiation,BP,L5 ET,nuclei,hypergeometric
GO:0098794,0.000511956404581735,0.999834437777613,16,512,postsynapse,CC,L5 ET,nuclei,hypergeometric
GO:0031224,2.02248535567393e-07,0.999999926097249,64,2512,intrinsic component of membrane,CC,L5 IT,cells,goseq
GO:0016021,0.0000180179128801441,0.99999224453673,57,2441,integral component of membrane,CC,L5 IT,cells,goseq
GO:0031226,0.0000194187186367516,0.999992957854525,32,645,intrinsic component of plasma membrane,CC,L5 IT,cells,goseq
GO:0005615,0.0000201049437867483,0.999994939049822,17,421,extracellular space,CC,L5 IT,cells,goseq
GO:0015837,0.0000216086643028872,0.999998030108819,7,72,amine transport,BP,L5 IT,cells,goseq
GO:0051952,0.0000216086643028872,0.999998030108819,7,72,regulation of amine transport,BP,L5 IT,cells,goseq
GO:0005249,0.0000485809452653263,0.999994059534531,8,58,voltage-gated potassium channel activity,MF,L5 IT,cells,goseq
GO:0050432,0.0000994540368905346,0.999993344328865,5,47,catecholamine secretion,BP,L5 IT,cells,goseq
GO:0061564,0.000177872746444693,0.999940973005335,20,383,axon development,BP,L5 IT,cells,goseq
GO:0022843,0.000208203442718341,0.999959198902302,10,96,voltage-gated cation channel activity,MF,L5 IT,cells,goseq
GO:0005887,0.00030410918293249,0.999876560996459,28,606,integral component of plasma membrane,CC,L5 IT,cells,goseq
GO:0031225,0.000324515773499825,0.999940049135882,9,70,anchored component of membrane,CC,L5 IT,cells,goseq
GO:0051937,0.000488653241077551,0.99995330956701,5,55,catecholamine transport,BP,L5 IT,cells,goseq
GO:0071300,0.000520163957554392,0.999966952350547,4,29,cellular response to retinoic acid,BP,L5 IT,cells,goseq
GO:0050433,0.000562326475134638,0.999962327410886,4,44,regulation of catecholamine secretion,BP,L5 IT,cells,goseq
GO:0042391,0.000567682184907799,0.999804466538689,18,321,regulation of membrane potential,BP,L5 IT,cells,goseq
GO:0031347,0.000632783333095313,0.999880189675373,8,233,regulation of defense response,BP,L5 IT,cells,goseq
GO:1903911,0.000654800866311082,0.999993680072013,2,8,positive regulation of receptor clustering,BP,L5 IT,cells,goseq
GO:0005251,0.000669016589404809,0.999956925611641,4,19,delayed rectifier potassium channel activity,MF,L5 IT,cells,goseq
GO:0005886,0.000710476561071914,0.999634962773164,61,2513,plasma membrane,CC,L5 IT,cells,goseq
GO:0030182,0.000712586996023676,0.999666365613024,36,1068,neuron differentiation,BP,L5 IT,cells,goseq
GO:0071944,0.000734239226867836,0.999621725424231,64,2702,cell periphery,CC,L5 IT,cells,goseq
GO:0015844,0.000743075259075295,0.999921716088405,5,60,monoamine transport,BP,L5 IT,cells,goseq
GO:0031348,0.000754205955354995,0.99991881803874,5,95,negative regulation of defense response,BP,L5 IT,cells,goseq
GO:0005267,0.000758516007686279,0.999857183315428,8,79,potassium channel activity,MF,L5 IT,cells,goseq
GO:0042501,0.000830481943018078,0.999990960184468,2,8,serine phosphorylation of STAT protein,BP,L5 IT,cells,goseq
GO:0005576,0.000875776964113886,0.999658732302929,21,678,extracellular region,CC,L5 IT,cells,goseq
GO:0051955,0.000986987474154209,0.999924824700421,4,32,regulation of amino acid transport,BP,L5 IT,cells,goseq
GO:0005244,0.000990427217014923,0.999759139847594,10,129,voltage-gated ion channel activity,MF,L5 IT,cells,goseq
GO:0022832,0.00101819049683605,0.99975140132092,10,130,voltage-gated channel activity,MF,L5 IT,cells,goseq
GO:0015874,0.00145559092733946,0.999977475867726,2,11,norepinephrine transport,BP,L5 IT,cells,goseq
GO:0032526,0.00157005538912453,0.999861016466332,4,45,response to retinoic acid,BP,L5 IT,cells,goseq
GO:0016020,0.00162873388091561,0.999142723088775,78,4644,membrane,CC,L5 IT,cells,goseq
GO:0022836,0.00166072483201021,0.999476553276639,13,193,gated channel activity,MF,L5 IT,cells,goseq
GO:1903367,0.00170984823034971,0.999974147573505,2,7,positive regulation of fear response,BP,L5 IT,cells,goseq
GO:2000987,0.00170984823034971,0.999974147573505,2,7,positive regulation of behavioral fear response,BP,L5 IT,cells,goseq
GO:0050727,0.00172057682266169,0.999718642319631,6,131,regulation of inflammatory response,BP,L5 IT,cells,goseq
GO:0032501,0.00181051180348338,0.999027855655154,72,3864,multicellular organismal process,BP,L5 IT,cells,goseq
GO:0006813,0.00181788264794843,0.999517430847286,10,152,potassium ion transport,BP,L5 IT,cells,goseq
GO:0007399,0.00185209946083277,0.999032044778464,45,1640,nervous system development,BP,L5 IT,cells,goseq
GO:0051900,0.00190213614102206,0.999965059541439,2,14,regulation of mitochondrial depolarization,BP,L5 IT,cells,goseq
GO:0043005,0.00192301332120554,0.999040495472987,36,1138,neuron projection,CC,L5 IT,cells,goseq
GO:0032890,0.00194385580043908,0.999816337514625,4,51,regulation of organic acid transport,BP,L5 IT,cells,goseq
GO:0048666,0.0019685336380359,0.999047602379803,32,923,neuron development,BP,L5 IT,cells,goseq
GO:0055022,0.00198418964745656,0.999893720987447,3,22,negative regulation of cardiac muscle tissue growth,BP,L5 IT,cells,goseq
GO:0061117,0.00198418964745656,0.999893720987447,3,22,negative regulation of heart growth,BP,L5 IT,cells,goseq
GO:0046658,0.00201757168980441,0.999749137981373,5,28,anchored component of plasma membrane,CC,L5 IT,cells,goseq
GO:0015079,0.00204295436424018,0.999545245831702,8,99,potassium ion transmembrane transporter activity,MF,L5 IT,cells,goseq
GO:0045202,0.00211576700964075,0.9989381421708,36,1067,synapse,CC,L5 IT,cells,goseq
GO:0051882,0.00211945076226023,0.999958517445726,2,15,mitochondrial depolarization,BP,L5 IT,cells,goseq
GO:0051953,0.00213201761299944,0.999881868401051,3,24,negative regulation of amine transport,BP,L5 IT,cells,goseq
GO:0007267,0.00213685579799081,0.998968742675295,31,1014,cell-cell signaling,BP,L5 IT,cells,goseq
GO:0007409,0.00217826064444377,0.999172074858206,17,352,axonogenesis,BP,L5 IT,cells,goseq
GO:0007614,0.00223918072787578,0.999886073703488,3,12,short-term memory,BP,L5 IT,cells,goseq
GO:0048731,0.00231833928129752,0.998732974678426,58,2779,system development,BP,L5 IT,cells,goseq
GO:0050728,0.00239019869292732,0.999759344701892,4,59,negative regulation of inflammatory response,BP,L5 IT,cells,goseq
GO:0014048,0.00254924078350989,0.999856709517496,3,16,regulation of glutamate secretion,BP,L5 IT,cells,goseq
GO:0000902,0.0026815506230068,0.998725896914863,28,798,cell morphogenesis,BP,L5 IT,cells,goseq
GO:0071805,0.00274307959262899,0.999289601912579,9,130,potassium ion transmembrane transport,BP,L5 IT,cells,goseq
GO:0048699,0.00295586823650029,0.998481912929188,36,1175,generation of neurons,BP,L5 IT,cells,goseq
GO:0004888,0.00319298051110754,0.99886118428953,14,257,transmembrane signaling receptor activity,MF,L5 IT,cells,goseq
GO:0005261,0.00322719154093231,0.998949489448902,12,199,cation channel activity,MF,L5 IT,cells,goseq
GO:0099536,0.00326495305178385,0.998506452827374,24,584,synaptic signaling,BP,L5 IT,cells,goseq
GO:0031175,0.00329517285835,0.998392408989852,29,829,neuron projection development,BP,L5 IT,cells,goseq
GO:0045214,0.00341033077104027,0.999781012530607,3,20,sarcomere organization,BP,L5 IT,cells,goseq
GO:0007275,0.00351640936305969,0.998027489465803,61,3107,multicellular organism development,BP,L5 IT,cells,goseq
GO:1903366,0.00362679247402136,1,1,1,negative regulation of fear response,BP,L5 IT,cells,goseq
GO:2000986,0.00362679247402136,1,1,1,negative regulation of behavioral fear response,BP,L5 IT,cells,goseq
GO:0007411,0.00364563546955248,0.998863795518693,11,158,axon guidance,BP,L5 IT,cells,goseq
GO:1990665,0.00365859687022117,1,1,1,AnxA2-p11 complex,CC,L5 IT,cells,goseq
GO:0021633,0.00366491040442054,1,1,1,optic nerve structural organization,BP,L5 IT,cells,goseq
GO:0009629,0.0036734231889713,1,1,1,response to gravity,BP,L5 IT,cells,goseq
GO:0097485,0.00367408575037932,0.998853530658543,11,159,neuron projection guidance,BP,L5 IT,cells,goseq
GO:0098742,0.00373722361878171,0.998724186778119,13,121,cell-cell adhesion via plasma-membrane adhesion molecules,BP,L5 IT,cells,goseq
GO:0014046,0.00396065621070244,0.999720990370837,3,31,dopamine secretion,BP,L5 IT,cells,goseq
GO:0014059,0.00396065621070244,0.999720990370837,3,31,regulation of dopamine secretion,BP,L5 IT,cells,goseq
GO:0006952,0.00406519171946488,0.998552939226903,13,557,defense response,BP,L5 IT,cells,goseq
GO:0032502,0.00409529095064211,0.997682827285797,66,3605,developmental process,BP,L5 IT,cells,goseq
GO:0099537,0.00415686725130984,0.998088323328783,23,562,trans-synaptic signaling,BP,L5 IT,cells,goseq
GO:1903365,0.00425214250121576,0.99988816409113,2,10,regulation of fear response,BP,L5 IT,cells,goseq
GO:2000822,0.00425214250121576,0.99988816409113,2,10,regulation of behavioral fear response,BP,L5 IT,cells,goseq
GO:0030425,0.00426000447312742,0.998066193086044,22,595,dendrite,CC,L5 IT,cells,goseq
GO:0036477,0.00429580618539211,0.997905697132089,27,817,somatodendritic compartment,CC,L5 IT,cells,goseq
GO:0031102,0.00455365565605184,0.999457157170902,4,47,neuron projection regeneration,BP,L5 IT,cells,goseq
GO:0097447,0.00464611522367138,0.997874445542866,22,598,dendritic tree,CC,L5 IT,cells,goseq
GO:0007613,0.00475510550574557,0.998774687325013,8,122,memory,BP,L5 IT,cells,goseq
GO:0030424,0.00492420438609033,0.997774152255145,21,573,axon,CC,L5 IT,cells,goseq
GO:0032989,0.00517347178260292,0.997572605862466,23,615,cellular component morphogenesis,BP,L5 IT,cells,goseq
GO:0006935,0.00541410961894409,0.997942537082704,14,294,chemotaxis,BP,L5 IT,cells,goseq
GO:0048856,0.00548084408176318,0.996842564798433,63,3345,anatomical structure development,BP,L5 IT,cells,goseq
GO:0042330,0.00550594162647443,0.997903150650108,14,297,taxis,BP,L5 IT,cells,goseq
GO:0098753,0.00555780105321957,1,1,1,anchored component of the cytoplasmic side of the plasma membrane,CC,L5 IT,cells,goseq
GO:0001836,0.00556381502896332,0.999547134257276,3,47,release of cytochrome c from mitochondria,BP,L5 IT,cells,goseq
GO:0007268,0.00562557986075367,0.997383778024655,22,553,chemical synaptic transmission,BP,L5 IT,cells,goseq
GO:0098916,0.00562557986075367,0.997383778024655,22,553,anterograde trans-synaptic signaling,BP,L5 IT,cells,goseq
GO:0030545,0.00564106674337346,0.998648769731006,7,148,signaling receptor regulator activity,MF,L5 IT,cells,goseq
GO:0034703,0.00570794464649913,0.998110132878937,11,156,cation channel complex,CC,L5 IT,cells,goseq
GO:0050853,0.00582107737902779,0.99954987464721,3,19,B cell receptor signaling pathway,BP,L5 IT,cells,goseq
GO:0038023,0.00597401713755996,0.997621678256595,15,332,signaling receptor activity,MF,L5 IT,cells,goseq
GO:0060089,0.00597401713755996,0.997621678256595,15,332,molecular transducer activity,MF,L5 IT,cells,goseq
GO:0031224,1.0660426658095e-13,0.999999999999975,64,2512,intrinsic component of membrane,CC,L5 IT,cells,hypergeometric
GO:0031226,1.16223831506529e-13,0.999999999999982,32,645,intrinsic component of plasma membrane,CC,L5 IT,cells,hypergeometric
GO:0071944,3.6799130089922e-12,0.999999999999043,64,2702,cell periphery,CC,L5 IT,cells,hypergeometric
GO:0005886,6.70098640761727e-12,0.999999999998244,61,2513,plasma membrane,CC,L5 IT,cells,hypergeometric
GO:0005887,3.055274250872e-11,0.999999999994732,28,606,integral component of plasma membrane,CC,L5 IT,cells,hypergeometric
GO:0045202,2.07224312965575e-10,0.999999999952549,36,1067,synapse,CC,L5 IT,cells,hypergeometric
GO:0030182,2.12751832193705e-10,0.999999999951231,36,1068,neuron differentiation,BP,L5 IT,cells,hypergeometric
GO:0016021,3.11008672642181e-10,0.999999999910039,57,2441,integral component of membrane,CC,L5 IT,cells,hypergeometric
GO:0007399,4.6773461005574e-10,0.99999999987452,45,1640,nervous system development,BP,L5 IT,cells,hypergeometric
GO:0098742,4.91146379979109e-10,0.999999999963247,13,121,cell-cell adhesion via plasma-membrane adhesion molecules,BP,L5 IT,cells,hypergeometric
GO:0043005,1.24064128918827e-09,0.999999999694427,36,1138,neuron projection,CC,L5 IT,cells,hypergeometric
GO:0048666,1.47867830015414e-09,0.999999999660709,32,923,neuron development,BP,L5 IT,cells,hypergeometric
GO:0048699,2.96910115755903e-09,0.999999999241663,36,1175,generation of neurons,BP,L5 IT,cells,hypergeometric
GO:0061564,3.91795570194912e-09,0.999999999375065,20,383,axon development,BP,L5 IT,cells,hypergeometric
GO:0032501,7.38039772095284e-09,0.999999997584008,72,3864,multicellular organismal process,BP,L5 IT,cells,hypergeometric
GO:0042391,8.51970537951548e-09,0.999999998727596,18,321,regulation of membrane potential,BP,L5 IT,cells,hypergeometric
GO:0031175,8.77788684451602e-09,0.999999997960579,29,829,neuron projection development,BP,L5 IT,cells,hypergeometric
GO:0030054,9.65705983453902e-09,0.999999997291591,39,1411,cell junction,CC,L5 IT,cells,hypergeometric
GO:0099536,1.03990984715578e-08,0.999999997903444,24,584,synaptic signaling,BP,L5 IT,cells,hypergeometric
GO:0007155,1.24574995232737e-08,0.999999997288987,26,687,cell adhesion,BP,L5 IT,cells,hypergeometric
GO:0022610,1.32270420039246e-08,0.999999997112376,26,689,biological adhesion,BP,L5 IT,cells,hypergeometric
GO:0000902,1.58480549912914e-08,0.999999996304177,28,798,cell morphogenesis,BP,L5 IT,cells,hypergeometric
GO:0048731,1.74735859899488e-08,0.999999994204861,58,2779,system development,BP,L5 IT,cells,hypergeometric
GO:0022008,1.80070384256231e-08,0.999999995033745,36,1257,neurogenesis,BP,L5 IT,cells,hypergeometric
GO:0099537,2.40674263758647e-08,0.999999995095035,23,562,trans-synaptic signaling,BP,L5 IT,cells,hypergeometric
GO:0097060,4.44507442946731e-08,0.999999993001058,17,317,synaptic membrane,CC,L5 IT,cells,hypergeometric
GO:0031225,5.3517833279402e-08,0.99999999672687,9,70,anchored component of membrane,CC,L5 IT,cells,hypergeometric
GO:0007267,5.59321477073947e-08,0.99999998512545,31,1014,cell-cell signaling,BP,L5 IT,cells,hypergeometric
GO:0007275,5.93707217728158e-08,0.999999979287259,61,3107,multicellular organism development,BP,L5 IT,cells,hypergeometric
GO:0022843,7.36514854831471e-08,0.999999994273854,10,96,voltage-gated cation channel activity,MF,L5 IT,cells,hypergeometric
GO:0007268,8.42694258602956e-08,0.999999982186979,22,553,chemical synaptic transmission,BP,L5 IT,cells,hypergeometric
GO:0098916,8.42694258602956e-08,0.999999982186979,22,553,anterograde trans-synaptic signaling,BP,L5 IT,cells,hypergeometric
GO:0034330,8.97964918546927e-08,0.999999980944646,22,555,cell junction organization,BP,L5 IT,cells,hypergeometric
GO:0036477,1.05214932883844e-07,0.999999973620019,27,817,somatodendritic compartment,CC,L5 IT,cells,hypergeometric
GO:0016020,1.19751914523195e-07,0.999999957684627,78,4644,membrane,CC,L5 IT,cells,hypergeometric
GO:0032989,1.25671659060388e-07,0.999999971767082,23,615,cellular component morphogenesis,BP,L5 IT,cells,hypergeometric
GO:0022836,1.43620336433625e-07,0.999999982047118,13,193,gated channel activity,MF,L5 IT,cells,hypergeometric
GO:0048856,1.50755234227421e-07,0.999999945464236,63,3345,anatomical structure development,BP,L5 IT,cells,hypergeometric
GO:0032502,1.67220062858964e-07,0.999999939121963,66,3605,developmental process,BP,L5 IT,cells,hypergeometric
GO:0005249,1.73805325413997e-07,0.999999990239219,8,58,voltage-gated potassium channel activity,MF,L5 IT,cells,hypergeometric
GO:0007409,2.01888751480083e-07,0.999999964439817,17,352,axonogenesis,BP,L5 IT,cells,hypergeometric
GO:0048812,2.38857317920977e-07,0.999999948178536,21,538,neuron projection morphogenesis,BP,L5 IT,cells,hypergeometric
GO:0048468,2.41820129290332e-07,0.999999924132467,37,1455,cell development,BP,L5 IT,cells,hypergeometric
GO:0000904,2.45695844741126e-07,0.999999944513654,22,588,cell morphogenesis involved in differentiation,BP,L5 IT,cells,hypergeometric
GO:0048667,2.69326865542514e-07,0.999999943519529,20,494,cell morphogenesis involved in neuron differentiation,BP,L5 IT,cells,hypergeometric
GO:0050808,2.73578939897774e-07,0.999999947848449,18,403,synapse organization,BP,L5 IT,cells,hypergeometric
GO:0030425,3.01266662344446e-07,0.999999931091022,22,595,dendrite,CC,L5 IT,cells,hypergeometric
GO:0120039,3.24457899632877e-07,0.999999928200427,21,548,plasma membrane bounded cell projection morphogenesis,BP,L5 IT,cells,hypergeometric
GO:0097447,3.28455998209146e-07,0.999999924463895,22,598,dendritic tree,CC,L5 IT,cells,hypergeometric
GO:0048858,3.44649297667797e-07,0.999999923433239,21,550,cell projection morphogenesis,BP,L5 IT,cells,hypergeometric
GO:0034329,5.86431717573257e-07,0.999999901486932,15,295,cell junction assembly,BP,L5 IT,cells,hypergeometric
GO:0120025,5.95076044443231e-07,0.999999803145124,38,1574,plasma membrane bounded cell projection,CC,L5 IT,cells,hypergeometric
GO:0032990,6.20556355394958e-07,0.999999856747825,21,570,cell part morphogenesis,BP,L5 IT,cells,hypergeometric
GO:0004888,6.29909308551337e-07,0.999999901387107,14,257,transmembrane signaling receptor activity,MF,L5 IT,cells,hypergeometric
GO:0009653,6.73854051872125e-07,0.99999977331918,39,1649,anatomical structure morphogenesis,BP,L5 IT,cells,hypergeometric
GO:0030424,6.76174952583823e-07,0.999999843026464,21,573,axon,CC,L5 IT,cells,hypergeometric
GO:0034703,8.7978228652374e-07,0.999999895079129,11,156,cation channel complex,CC,L5 IT,cells,hypergeometric
GO:0034702,8.91084446935493e-07,0.99999988044195,12,190,ion channel complex,CC,L5 IT,cells,hypergeometric
GO:0007411,9.98708533130328e-07,0.999999879251594,11,158,axon guidance,BP,L5 IT,cells,hypergeometric
GO:0097485,0.00000106331667540032,0.999999870564654,11,159,neuron projection guidance,BP,L5 IT,cells,hypergeometric
GO:0098609,0.00000113215190735527,0.999999772689927,17,398,cell-cell adhesion,BP,L5 IT,cells,hypergeometric
GO:0050877,0.00000115300844575342,0.999999712812613,22,644,nervous system process,BP,L5 IT,cells,hypergeometric
GO:0005244,0.00000119309170076602,0.999999871661123,10,129,voltage-gated ion channel activity,MF,L5 IT,cells,hypergeometric
GO:0022832,0.00000128093722747979,0.99999986105462,10,130,voltage-gated channel activity,MF,L5 IT,cells,hypergeometric
GO:0098793,0.00000139122771887158,0.999999716193039,17,404,presynapse,CC,L5 IT,cells,hypergeometric
GO:0005261,0.00000145551965184494,0.999999794804527,12,199,cation channel activity,MF,L5 IT,cells,hypergeometric
GO:0005267,0.0000019606232628586,0.999999843785218,8,79,potassium channel activity,MF,L5 IT,cells,hypergeometric
GO:0007154,0.00000230182732888628,0.999999086695572,58,3169,cell communication,BP,L5 IT,cells,hypergeometric
GO:0120036,0.0000023099804100909,0.999999271162406,30,1137,plasma membrane bounded cell projection organization,BP,L5 IT,cells,hypergeometric
GO:0005615,0.00000244277280544675,0.999999479371636,17,421,extracellular space,CC,L5 IT,cells,hypergeometric
GO:0038023,0.00000258029874839815,0.99999950856621,15,332,signaling receptor activity,MF,L5 IT,cells,hypergeometric
GO:0060089,0.00000258029874839815,0.99999950856621,15,332,molecular transducer activity,MF,L5 IT,cells,hypergeometric
GO:0005216,0.00000261739255450163,0.999999570390559,13,249,ion channel activity,MF,L5 IT,cells,hypergeometric
GO:0006935,0.00000310969596252816,0.999999438377705,14,294,chemotaxis,BP,L5 IT,cells,hypergeometric
GO:0098978,0.00000310969596252816,0.999999438377705,14,294,glutamatergic synapse,CC,L5 IT,cells,hypergeometric
GO:0042734,0.00000333928370520255,0.999999652108998,9,113,presynaptic membrane,CC,L5 IT,cells,hypergeometric
GO:0042330,0.00000350052396522077,0.999999360960096,14,297,taxis,BP,L5 IT,cells,hypergeometric
GO:0023052,0.00000384740814077009,0.999998445584433,57,3134,signaling,BP,L5 IT,cells,hypergeometric
GO:0030030,0.00000387789812592317,0.999998741541769,30,1166,cell projection organization,BP,L5 IT,cells,hypergeometric
GO:0015267,0.00000439699591579119,0.999999241380468,13,261,channel activity,MF,L5 IT,cells,hypergeometric
GO:0022803,0.00000439699591579119,0.999999241380468,13,261,passive transmembrane transporter activity,MF,L5 IT,cells,hypergeometric
GO:0034705,0.00000524460643185847,0.999999619628244,7,64,potassium channel complex,CC,L5 IT,cells,hypergeometric
GO:0006813,0.00000528876039117642,0.999999321254002,10,152,potassium ion transport,BP,L5 IT,cells,hypergeometric
GO:0007416,0.00000560792069885727,0.999999275232009,10,153,synapse assembly,BP,L5 IT,cells,hypergeometric
GO:0042995,0.00000624852287687166,0.999997690736945,38,1730,cell projection,CC,L5 IT,cells,hypergeometric
GO:0043025,0.00000634765703547792,0.999998406364399,19,553,neuronal cell body,CC,L5 IT,cells,hypergeometric
GO:0098797,0.00000666173037885732,0.999998710152716,14,314,plasma membrane protein complex,CC,L5 IT,cells,hypergeometric
GO:0050804,0.00000816613927020847,0.999998179949955,16,412,modulation of chemical synaptic transmission,BP,L5 IT,cells,hypergeometric
GO:0099177,0.0000084194318328246,0.99999811868244,16,413,regulation of trans-synaptic signaling,BP,L5 IT,cells,hypergeometric
GO:0044297,0.00000858394236583616,0.999997712570815,20,618,cell body,CC,L5 IT,cells,hypergeometric
GO:0005576,0.00000971816729889158,0.999997297764202,21,678,extracellular region,CC,L5 IT,cells,hypergeometric
GO:0032879,0.0000100932321526024,0.99999618071061,38,1765,regulation of localization,BP,L5 IT,cells,hypergeometric
GO:0071805,0.0000105724658590065,0.999998719062773,9,130,potassium ion transmembrane transport,BP,L5 IT,cells,hypergeometric
GO:0046658,0.0000107178992045625,0.999999574336644,5,28,anchored component of plasma membrane,CC,L5 IT,cells,hypergeometric
GO:0015079,0.0000107610121175101,0.99999890210962,8,99,potassium ion transmembrane transporter activity,MF,L5 IT,cells,hypergeometric
GO:0015837,0.0000115853103653574,0.999999042424624,7,72,amine transport,BP,L5 IT,cells,hypergeometric
GO:0051952,0.0000115853103653574,0.999999042424624,7,72,regulation of amine transport,BP,L5 IT,cells,hypergeometric
GO:0003008,0.0000116121286525029,0.999996278353285,26,979,system process,BP,L5 IT,cells,hypergeometric
GO:0050839,0.0000121760145706691,0.999998272557518,10,167,cell adhesion molecule binding,MF,L5 IT,cells,hypergeometric
GO:1902495,0.000019312380837477,0.999996444678817,12,256,transmembrane transporter complex,CC,L5 IT,cells,hypergeometric
GO:0031224,0.000154943704426915,0.999940905665307,39,2434,intrinsic component of membrane,CC,L5 IT,nuclei,goseq
GO:0099029,0.000539059906294926,1,2,2,anchored component of presynaptic active zone membrane,CC,L5 IT,nuclei,goseq
GO:0016021,0.000685397361021758,0.999713772173318,36,2370,integral component of membrane,CC,L5 IT,nuclei,goseq
GO:0007614,0.000702011170599346,0.999976082767327,3,13,short-term memory,BP,L5 IT,nuclei,goseq
GO:0071300,0.00139044362402109,0.999933779691825,3,27,cellular response to retinoic acid,BP,L5 IT,nuclei,goseq
GO:0022843,0.00165668004501832,0.999693241098159,7,91,voltage-gated cation channel activity,MF,L5 IT,nuclei,goseq
GO:0005249,0.00178427090791197,0.999776190285478,5,53,voltage-gated potassium channel activity,MF,L5 IT,nuclei,goseq
GO:0098742,0.00205443909514028,0.999429420168382,11,119,cell-cell adhesion via plasma-membrane adhesion molecules,BP,L5 IT,nuclei,goseq
GO:0005251,0.00232313225319331,0.999873976661692,3,17,delayed rectifier potassium channel activity,MF,L5 IT,nuclei,goseq
GO:0032526,0.00273894439897168,0.999830111760268,3,40,response to retinoic acid,BP,L5 IT,nuclei,goseq
GO:0002274,0.00303530165811502,0.999674924301979,4,77,myeloid leukocyte activation,BP,L5 IT,nuclei,goseq
GO:0043256,0.00324396154861263,0.999932554966765,2,7,laminin complex,CC,L5 IT,nuclei,goseq
GO:0001662,0.00347025593821349,0.999624972499288,4,41,behavioral fear response,BP,L5 IT,nuclei,goseq
GO:0002209,0.00351004436802334,0.999618894514552,4,42,behavioral defense response,BP,L5 IT,nuclei,goseq
GO:0031092,0.003979495446848,1,1,1,platelet alpha granule membrane,CC,L5 IT,nuclei,goseq
GO:0035543,0.003979495446848,1,1,1,positive regulation of SNARE complex assembly,BP,L5 IT,nuclei,goseq
GO:0051585,0.003979495446848,1,1,1,negative regulation of dopamine uptake involved in synaptic transmission,BP,L5 IT,nuclei,goseq
GO:0051622,0.003979495446848,1,1,1,negative regulation of norepinephrine uptake,BP,L5 IT,nuclei,goseq
GO:0051945,0.003979495446848,1,1,1,negative regulation of catecholamine uptake involved in synaptic transmission,BP,L5 IT,nuclei,goseq
GO:1903282,0.003979495446848,1,1,1,regulation of glutathione peroxidase activity,BP,L5 IT,nuclei,goseq
GO:1903284,0.003979495446848,1,1,1,positive regulation of glutathione peroxidase activity,BP,L5 IT,nuclei,goseq
GO:1903285,0.003979495446848,1,1,1,positive regulation of hydrogen peroxide catabolic process,BP,L5 IT,nuclei,goseq
GO:0070831,0.00401296322944003,0.999900609876559,2,9,basement membrane assembly,BP,L5 IT,nuclei,goseq
GO:0042596,0.00425432558792755,0.999511102628329,4,44,fear response,BP,L5 IT,nuclei,goseq
GO:0005244,0.0045685098729046,0.998973560966465,7,123,voltage-gated ion channel activity,MF,L5 IT,nuclei,goseq
GO:0061303,0.00457653971265621,0.99999224529478,1,4,cornea development in camera-type eye,BP,L5 IT,nuclei,goseq
GO:0022832,0.0046403803124481,0.998954167483172,7,124,voltage-gated channel activity,MF,L5 IT,nuclei,goseq
GO:0006952,0.00488215308062924,0.998622600011509,9,533,defense response,BP,L5 IT,nuclei,goseq
GO:2000295,0.00495046454332216,0.999993947392029,1,2,regulation of hydrogen peroxide catabolic process,BP,L5 IT,nuclei,goseq
GO:0051620,0.00496652110721272,0.999993908015938,1,2,norepinephrine uptake,BP,L5 IT,nuclei,goseq
GO:0051621,0.00496652110721272,0.999993908015938,1,2,regulation of norepinephrine uptake,BP,L5 IT,nuclei,goseq
GO:1904714,0.00497505547828238,0.999993887034698,1,2,regulation of chaperone-mediated autophagy,BP,L5 IT,nuclei,goseq
GO:1904715,0.00497505547828238,0.999993887034698,1,2,negative regulation of chaperone-mediated autophagy,BP,L5 IT,nuclei,goseq
GO:2000468,0.00498551307548111,0.999993861276019,1,2,regulation of peroxidase activity,BP,L5 IT,nuclei,goseq
GO:2000470,0.00498551307548111,0.999993861276019,1,2,positive regulation of peroxidase activity,BP,L5 IT,nuclei,goseq
GO:0042116,0.00595439529492381,0.999516249638041,3,35,macrophage activation,BP,L5 IT,nuclei,goseq
GO:0042416,0.00612137676281825,0.999987657692826,1,3,dopamine biosynthetic process,BP,L5 IT,nuclei,goseq
GO:0061357,0.00622992340894084,0.999987215466176,1,3,positive regulation of Wnt protein secretion,BP,L5 IT,nuclei,goseq
GO:0010040,0.00636677167853313,0.999986646812277,1,3,response to iron(II) ion,BP,L5 IT,nuclei,goseq
GO:0060732,0.00722858143521619,0.999980631949127,1,4,positive regulation of inositol phosphate biosynthetic process,BP,L5 IT,nuclei,goseq
GO:0051584,0.00735153394556302,0.999979966428275,1,4,regulation of dopamine uptake involved in synaptic transmission,BP,L5 IT,nuclei,goseq
GO:0051940,0.00735153394556302,0.999979966428275,1,4,regulation of catecholamine uptake involved in synaptic transmission,BP,L5 IT,nuclei,goseq
GO:0050812,0.00755601587990202,0.999978834627513,1,4,regulation of acyl-CoA biosynthetic process,BP,L5 IT,nuclei,goseq
GO:0010726,0.00813816191304251,0.999973807975933,1,5,positive regulation of hydrogen peroxide metabolic process,BP,L5 IT,nuclei,goseq
GO:0051953,0.00824059175883109,0.999672727231537,2,18,negative regulation of amine transport,BP,L5 IT,nuclei,goseq
GO:0055022,0.00956724193503017,0.999582526784775,2,22,negative regulation of cardiac muscle tissue growth,BP,L5 IT,nuclei,goseq
GO:0061117,0.00956724193503017,0.999582526784775,2,22,negative regulation of heart growth,BP,L5 IT,nuclei,goseq
GO:0005267,0.0102063190294857,0.998033966194877,5,75,potassium channel activity,MF,L5 IT,nuclei,goseq
GO:0070494,0.0104682267481351,0.999963833977555,1,3,regulation of thrombin-activated receptor signaling pathway,BP,L5 IT,nuclei,goseq
GO:0070495,0.0104682267481351,0.999963833977555,1,3,negative regulation of thrombin-activated receptor signaling pathway,BP,L5 IT,nuclei,goseq
GO:1903136,0.0108509808542124,0.999953383921327,1,5,cuprous ion binding,MF,L5 IT,nuclei,goseq
GO:0031091,0.0110183686953777,0.999949934721704,1,6,platelet alpha granule,CC,L5 IT,nuclei,goseq
GO:0071280,0.011818054661476,0.999942385453376,1,6,cellular response to copper ion,BP,L5 IT,nuclei,goseq
GO:0005509,0.0121162371840698,0.99582019868787,10,296,calcium ion binding,MF,L5 IT,nuclei,goseq
GO:0009713,0.0121413218863743,0.999941607245916,1,5,catechol-containing compound biosynthetic process,BP,L5 IT,nuclei,goseq
GO:0042423,0.0121413218863743,0.999941607245916,1,5,catecholamine biosynthetic process,BP,L5 IT,nuclei,goseq
GO:0071711,0.0131254415410373,0.999339063369144,2,17,basement membrane organization,BP,L5 IT,nuclei,goseq
GO:0043030,0.0131665359906581,0.999323585396984,2,21,regulation of macrophage activation,BP,L5 IT,nuclei,goseq
GO:0050542,0.0135497656194472,0.999939322621001,1,3,icosanoid binding,MF,L5 IT,nuclei,goseq
GO:0050544,0.0135497656194472,0.999939322621001,1,3,arachidonic acid binding,MF,L5 IT,nuclei,goseq
GO:0014048,0.0137923694520302,0.999296512672695,2,15,regulation of glutamate secretion,BP,L5 IT,nuclei,goseq
GO:0038007,0.014322821062178,0.999388531265603,2,6,netrin-activated signaling pathway,BP,L5 IT,nuclei,goseq
GO:0050543,0.0145346547780373,0.9999214509435,1,4,icosatetraenoic acid binding,MF,L5 IT,nuclei,goseq
GO:0150011,0.0149877468779758,0.999263026730194,2,9,regulation of neuron projection arborization,BP,L5 IT,nuclei,goseq
GO:0042744,0.0155260052531327,0.999891403526152,1,11,hydrogen peroxide catabolic process,BP,L5 IT,nuclei,goseq
GO:0005261,0.0162329126584617,0.994874123476001,8,190,cation channel activity,MF,L5 IT,nuclei,goseq
GO:0010927,0.0165956367729439,0.997985329341553,3,64,cellular component assembly involved in morphogenesis,BP,L5 IT,nuclei,goseq
GO:0008502,0.0170918250462148,1,1,1,melatonin receptor activity,MF,L5 IT,nuclei,goseq
GO:0010919,0.0176211543351375,0.999871615217894,1,6,regulation of inositol phosphate biosynthetic process,BP,L5 IT,nuclei,goseq
GO:0031347,0.0177718690456466,0.996777845497988,4,219,regulation of defense response,BP,L5 IT,nuclei,goseq
GO:0045199,0.0181487290663301,0.999859912528109,1,7,maintenance of epithelial cell apical/basal polarity,BP,L5 IT,nuclei,goseq
GO:0036041,0.0181847627962268,0.999859353713589,1,7,long-chain fatty acid binding,MF,L5 IT,nuclei,goseq
GO:0048787,0.0186194626584964,0.997777519449589,3,22,presynaptic active zone membrane,CC,L5 IT,nuclei,goseq
GO:0002287,0.0187221891911765,0.998831223796793,2,24,alpha-beta T cell activation involved in immune response,BP,L5 IT,nuclei,goseq
GO:0002293,0.0187221891911765,0.998831223796793,2,24,alpha-beta T cell differentiation involved in immune response,BP,L5 IT,nuclei,goseq
GO:0002294,0.0187221891911765,0.998831223796793,2,24,"CD4-positive, alpha-beta T cell differentiation involved in immune response",BP,L5 IT,nuclei,goseq
GO:0042093,0.0187221891911765,0.998831223796793,2,24,T-helper cell differentiation,BP,L5 IT,nuclei,goseq
GO:1990513,0.0187341183767326,0.999912706675376,1,2,CLOCK-BMAL transcription complex,CC,L5 IT,nuclei,goseq
GO:0046688,0.0187695465774618,0.999841097874544,1,11,response to copper ion,BP,L5 IT,nuclei,goseq
GO:0005042,0.0190243434231059,0.999129215695602,2,5,netrin receptor activity,MF,L5 IT,nuclei,goseq
GO:0015079,0.0190944120544575,0.995664100440838,5,96,potassium ion transmembrane transporter activity,MF,L5 IT,nuclei,goseq
GO:0035090,0.0191327740660735,0.999841022987974,1,8,maintenance of apical/basal cell polarity,BP,L5 IT,nuclei,goseq
GO:0002292,0.0191780329011714,0.998781308620688,2,26,T cell differentiation involved in immune response,BP,L5 IT,nuclei,goseq
GO:0085029,0.0192167836992316,0.998804818453741,2,19,extracellular matrix assembly,BP,L5 IT,nuclei,goseq
GO:0030182,0.0194644774473016,0.9902383087545,22,1022,neuron differentiation,BP,L5 IT,nuclei,goseq
GO:0031226,0.0195535993737802,0.990897681803558,17,619,intrinsic component of plasma membrane,CC,L5 IT,nuclei,goseq
GO:0031852,0.0198219871400791,0.999853577235033,1,4,mu-type opioid receptor binding,MF,L5 IT,nuclei,goseq
GO:0035977,0.0201462238508688,0.999838697408338,1,5,protein deglycosylation involved in glycoprotein catabolic process,BP,L5 IT,nuclei,goseq
GO:0036507,0.0201462238508688,0.999838697408338,1,5,protein demannosylation,BP,L5 IT,nuclei,goseq
GO:0036508,0.0201462238508688,0.999838697408338,1,5,"protein alpha-1,2-demannosylation",BP,L5 IT,nuclei,goseq
GO:0097466,0.0201462238508688,0.999838697408338,1,5,ubiquitin-dependent glycoprotein ERAD pathway,BP,L5 IT,nuclei,goseq
GO:1904382,0.0201462238508688,0.999838697408338,1,5,mannose trimming involved in glycoprotein ERAD pathway,BP,L5 IT,nuclei,goseq
GO:0031628,0.0208179856553843,0.999827713372817,1,5,opioid receptor binding,MF,L5 IT,nuclei,goseq
GO:0015874,0.020931505388701,0.999806590819378,1,9,norepinephrine transport,BP,L5 IT,nuclei,goseq
GO:0098978,0.0214157945196424,0.991537643780241,11,291,glutamatergic synapse,CC,L5 IT,nuclei,goseq
GO:0045214,0.02166900003165,0.998557447194175,2,20,sarcomere organization,BP,L5 IT,nuclei,goseq
GO:0009309,0.0223243962477536,0.999768948653695,1,15,amine biosynthetic process,BP,L5 IT,nuclei,goseq
GO:0042401,0.0223243962477536,0.999768948653695,1,15,cellular biogenic amine biosynthetic process,BP,L5 IT,nuclei,goseq
GO:0002286,0.0226373682516946,0.99840316366027,2,36,T cell activation involved in immune response,BP,L5 IT,nuclei,goseq
GO:0022836,0.0226374502661919,0.992401305222327,8,184,gated channel activity,MF,L5 IT,nuclei,goseq
GO:0098742,2.77904440557516e-10,0.999999999985934,11,119,cell-cell adhesion via plasma-membrane adhesion molecules,BP,L5 IT,nuclei,hypergeometric
GO:0031224,2.73119160287388e-09,0.999999999394286,39,2434,intrinsic component of membrane,CC,L5 IT,nuclei,hypergeometric
GO:0016021,8.68824937864249e-08,0.999999977898547,36,2370,integral component of membrane,CC,L5 IT,nuclei,hypergeometric
GO:0005886,2.02412968871904e-07,0.999999946379134,36,2446,plasma membrane,CC,L5 IT,nuclei,hypergeometric
GO:0030182,3.32404560751578e-07,0.999999928677238,22,1022,neuron differentiation,BP,L5 IT,nuclei,hypergeometric
GO:0031226,3.68229623651534e-07,0.999999935388635,17,619,intrinsic component of plasma membrane,CC,L5 IT,nuclei,hypergeometric
GO:0071944,3.80123924529549e-07,0.999999895567921,37,2627,cell periphery,CC,L5 IT,nuclei,hypergeometric
GO:0048699,0.00000164838831857563,0.999999607640232,22,1122,generation of neurons,BP,L5 IT,nuclei,hypergeometric
GO:0022843,0.00000211347686230051,0.999999867379148,7,91,voltage-gated cation channel activity,MF,L5 IT,nuclei,hypergeometric
GO:0098978,0.0000028433504091941,0.999999623883493,11,291,glutamatergic synapse,CC,L5 IT,nuclei,hypergeometric
GO:0007399,0.00000290816381432405,0.999999212305215,26,1560,nervous system development,BP,L5 IT,nuclei,hypergeometric
GO:0048666,0.00000305960531024174,0.999999311532436,19,890,neuron development,BP,L5 IT,nuclei,hypergeometric
GO:0005887,0.00000459005675330411,0.999999117886245,15,583,integral component of plasma membrane,CC,L5 IT,nuclei,hypergeometric
GO:0022008,0.00000465382799272471,0.999998812585639,22,1194,neurogenesis,BP,L5 IT,nuclei,hypergeometric
GO:0032501,0.00000596116822063875,0.999998107855601,43,3729,multicellular organismal process,BP,L5 IT,nuclei,hypergeometric
GO:0048731,0.00000602449889436893,0.999998112558756,35,2665,system development,BP,L5 IT,nuclei,hypergeometric
GO:0007155,0.00000619648300530169,0.999998708978402,16,677,cell adhesion,BP,L5 IT,nuclei,hypergeometric
GO:0022610,0.00000643432968226179,0.99999865518693,16,679,biological adhesion,BP,L5 IT,nuclei,hypergeometric
GO:0098609,0.0000066889371319071,0.999998929348487,12,383,cell-cell adhesion,BP,L5 IT,nuclei,hypergeometric
GO:0007275,0.0000106651507662607,0.999996521387779,37,2986,multicellular organism development,BP,L5 IT,nuclei,hypergeometric
GO:0005244,0.0000156955714973425,0.999998640261627,7,123,voltage-gated ion channel activity,MF,L5 IT,nuclei,hypergeometric
GO:0022832,0.0000165481135720465,0.999998554060323,7,124,voltage-gated channel activity,MF,L5 IT,nuclei,hypergeometric
GO:0005509,0.0000224158351659079,0.999996647412233,10,296,calcium ion binding,MF,L5 IT,nuclei,hypergeometric
GO:0051963,0.0000237276721784462,0.99999831620151,6,88,regulation of synapse assembly,BP,L5 IT,nuclei,hypergeometric
GO:0005249,0.0000245006640673027,0.999998794951771,5,53,voltage-gated potassium channel activity,MF,L5 IT,nuclei,hypergeometric
GO:0098797,0.0000258878627908515,0.999996059816485,10,301,plasma membrane protein complex,CC,L5 IT,nuclei,hypergeometric
GO:0022836,0.0000268067363181888,0.999996909148694,8,184,gated channel activity,MF,L5 IT,nuclei,hypergeometric
GO:0097060,0.0000274008438742975,0.999995800613289,10,303,synaptic membrane,CC,L5 IT,nuclei,hypergeometric
GO:0005261,0.0000337484094932458,0.999995975948054,8,190,cation channel activity,MF,L5 IT,nuclei,hypergeometric
GO:0034330,0.0000408892009990091,0.999991493870274,13,536,cell junction organization,BP,L5 IT,nuclei,hypergeometric
GO:1905606,0.0000421608336967055,0.9999986314415,4,30,regulation of presynapse assembly,BP,L5 IT,nuclei,hypergeometric
GO:0099029,0.0000431020537026235,1,2,2,anchored component of presynaptic active zone membrane,CC,L5 IT,nuclei,hypergeometric
GO:0004888,0.0000509922417246168,0.99999251449582,9,261,transmembrane signaling receptor activity,MF,L5 IT,nuclei,hypergeometric
GO:0031175,0.0000517595668077457,0.999987053264631,16,803,neuron projection development,BP,L5 IT,nuclei,hypergeometric
GO:0009653,0.000052095484468259,0.999983589133374,24,1603,anatomical structure morphogenesis,BP,L5 IT,nuclei,hypergeometric
GO:0099560,0.0000547738284473784,0.999998085778154,4,32,synaptic membrane adhesion,BP,L5 IT,nuclei,hypergeometric
GO:0048468,0.0000615005004917737,0.99998116985641,22,1404,cell development,BP,L5 IT,nuclei,hypergeometric
GO:0007156,0.0000615394626393563,0.999996282705427,5,64,homophilic cell adhesion via plasma membrane adhesion molecules,BP,L5 IT,nuclei,hypergeometric
GO:0043005,0.0000638382018263121,0.99998186824168,19,1101,neuron projection,CC,L5 IT,nuclei,hypergeometric
GO:0038023,0.0000641997096565511,0.999989075803821,10,335,signaling receptor activity,MF,L5 IT,nuclei,hypergeometric
GO:0060089,0.0000641997096565511,0.999989075803821,10,335,molecular transducer activity,MF,L5 IT,nuclei,hypergeometric
GO:0048856,0.0000680670988800947,0.999975339681798,37,3222,anatomical structure development,BP,L5 IT,nuclei,hypergeometric
GO:0099174,0.0000699394037192251,0.999997381913065,4,34,regulation of presynapse organization,BP,L5 IT,nuclei,hypergeometric
GO:0007614,0.0000754979997544247,0.999998802698301,3,13,short-term memory,BP,L5 IT,nuclei,hypergeometric
GO:0042734,0.0000755414213638079,0.999993336939666,6,108,presynaptic membrane,CC,L5 IT,nuclei,hypergeometric
GO:0034329,0.000095192392892246,0.999984800004708,9,283,cell junction assembly,BP,L5 IT,nuclei,hypergeometric
GO:0050839,0.000111173342298886,0.999986723064294,7,167,cell adhesion molecule binding,MF,L5 IT,nuclei,hypergeometric
GO:0005267,0.000131700026784976,0.999990569617052,5,75,potassium channel activity,MF,L5 IT,nuclei,hypergeometric
GO:0032989,0.000133711392132092,0.99996856956724,13,602,cellular component morphogenesis,BP,L5 IT,nuclei,hypergeometric
GO:0061564,0.000136873550642827,0.999974393375164,10,367,axon development,BP,L5 IT,nuclei,hypergeometric
GO:0001662,0.000147496666606403,0.999993197016447,4,41,behavioral fear response,BP,L5 IT,nuclei,hypergeometric
GO:0098889,0.000147496666606403,0.999993197016447,4,41,intrinsic component of presynaptic membrane,CC,L5 IT,nuclei,hypergeometric
GO:0000902,0.000155502747378496,0.999958815060492,15,788,cell morphogenesis,BP,L5 IT,nuclei,hypergeometric
GO:0007268,0.00016165732889258,0.99996362830941,12,530,chemical synaptic transmission,BP,L5 IT,nuclei,hypergeometric
GO:0098916,0.00016165732889258,0.99996362830941,12,530,anterograde trans-synaptic signaling,BP,L5 IT,nuclei,hypergeometric
GO:0016020,0.00016184245134286,0.999938820387553,45,4491,membrane,CC,L5 IT,nuclei,hypergeometric
GO:0002209,0.000162213904003801,0.999992317088669,4,42,behavioral defense response,BP,L5 IT,nuclei,hypergeometric
GO:0099054,0.000162213904003801,0.999992317088669,4,42,presynapse assembly,BP,L5 IT,nuclei,hypergeometric
GO:0005216,0.000173797509550113,0.999973578470438,8,240,ion channel activity,MF,L5 IT,nuclei,hypergeometric
GO:0005251,0.00017613196757955,0.999996093355759,3,17,delayed rectifier potassium channel activity,MF,L5 IT,nuclei,hypergeometric
GO:0099537,0.000189209245293985,0.999956673139502,12,539,trans-synaptic signaling,BP,L5 IT,nuclei,hypergeometric
GO:0042596,0.000194789651546571,0.99999029139347,4,44,fear response,BP,L5 IT,nuclei,hypergeometric
GO:0050808,0.000219919715776124,0.999956296050221,10,389,synapse organization,BP,L5 IT,nuclei,hypergeometric
GO:0015267,0.000229739312178611,0.999963568089622,8,250,channel activity,MF,L5 IT,nuclei,hypergeometric
GO:0022803,0.000229739312178611,0.999963568089622,8,250,passive transmembrane transporter activity,MF,L5 IT,nuclei,hypergeometric
GO:0099536,0.000269589819436044,0.999935750588324,12,560,synaptic signaling,BP,L5 IT,nuclei,hypergeometric
GO:0099172,0.000273707857215876,0.999985002357515,4,48,presynapse organization,BP,L5 IT,nuclei,hypergeometric
GO:0048667,0.000282193829550848,0.999937016527518,11,480,cell morphogenesis involved in neuron differentiation,BP,L5 IT,nuclei,hypergeometric
GO:0045202,0.000294502943216043,0.999910533951532,17,1030,synapse,CC,L5 IT,nuclei,hypergeometric
GO:0032502,0.000358986631650666,0.999855914056009,37,3464,developmental process,BP,L5 IT,nuclei,hypergeometric
GO:0030054,0.00035920293621992,0.999879290716018,20,1361,cell junction,CC,L5 IT,nuclei,hypergeometric
GO:0000904,0.000360156105870648,0.999911282029984,12,578,cell morphogenesis involved in differentiation,BP,L5 IT,nuclei,hypergeometric
GO:0030425,0.000360156105870648,0.999911282029984,12,578,dendrite,CC,L5 IT,nuclei,hypergeometric
GO:0007409,0.000376456218304605,0.999927321147324,9,340,axonogenesis,BP,L5 IT,nuclei,hypergeometric
GO:0097447,0.000377522247393417,0.99990649996903,12,581,dendritic tree,CC,L5 IT,nuclei,hypergeometric
GO:0048787,0.00038954832552597,0.999988288583689,3,22,presynaptic active zone membrane,CC,L5 IT,nuclei,hypergeometric
GO:0007416,0.000393190943796956,0.99995247640458,6,146,synapse assembly,BP,L5 IT,nuclei,hypergeometric
GO:0045211,0.000415994486533839,0.999937944068695,7,207,postsynaptic membrane,CC,L5 IT,nuclei,hypergeometric
GO:0015079,0.000419070069445052,0.99996105761301,5,96,potassium ion transmembrane transporter activity,MF,L5 IT,nuclei,hypergeometric
GO:0005042,0.000425510268189452,0.999997257958563,2,5,netrin receptor activity,MF,L5 IT,nuclei,hypergeometric
GO:0008066,0.000445864604762475,0.999985893536051,3,23,glutamate receptor activity,MF,L5 IT,nuclei,hypergeometric
GO:0034703,0.000470592965968948,0.999941103461163,6,151,cation channel complex,CC,L5 IT,nuclei,hypergeometric
GO:1901888,0.000470592965968948,0.999941103461163,6,151,regulation of cell junction assembly,BP,L5 IT,nuclei,hypergeometric
GO:0050807,0.000480175491890174,0.999926586772932,7,212,regulation of synapse organization,BP,L5 IT,nuclei,hypergeometric
GO:0009986,0.000505179903407813,0.999898327101052,9,354,cell surface,CC,L5 IT,nuclei,hypergeometric
GO:0050803,0.000522332566665091,0.999918977982235,7,215,regulation of synapse structure or activity,BP,L5 IT,nuclei,hypergeometric
GO:0036477,0.000555835051715097,0.99984006389493,14,790,somatodendritic compartment,CC,L5 IT,nuclei,hypergeometric
GO:0099240,0.000579175167461875,0.999942074429236,5,103,intrinsic component of synaptic membrane,CC,L5 IT,nuclei,hypergeometric
GO:0048812,0.000594198762094024,0.999854729642786,11,524,neuron projection morphogenesis,BP,L5 IT,nuclei,hypergeometric
GO:0038007,0.000635536366837914,0.999994541929107,2,6,netrin-activated signaling pathway,BP,L5 IT,nuclei,hypergeometric
GO:0099026,0.000635536366837914,0.999994541929107,2,6,anchored component of presynaptic membrane,CC,L5 IT,nuclei,hypergeometric
GO:0034705,0.000688198168359998,0.999951241604927,4,61,potassium channel complex,CC,L5 IT,nuclei,hypergeometric
GO:0120039,0.000706555278264033,0.99982349661868,11,535,plasma membrane bounded cell projection morphogenesis,BP,L5 IT,nuclei,hypergeometric
GO:0071300,0.000722588004095597,0.999972593871819,3,27,cellular response to retinoic acid,BP,L5 IT,nuclei,hypergeometric
GO:0048858,0.000740111005242218,0.999814038600008,11,538,cell projection morphogenesis,BP,L5 IT,nuclei,hypergeometric
GO:0120036,0.000773485239734516,0.999742912112949,17,1119,plasma membrane bounded cell projection organization,BP,L5 IT,nuclei,hypergeometric
GO:0007154,0.000832634133870681,0.999650944731342,33,3053,cell communication,BP,L5 IT,nuclei,hypergeometric
GO:0048786,0.000875317335383465,0.999933671761532,4,65,presynaptic active zone,CC,L5 IT,nuclei,hypergeometric
GO:0043256,0.000885948381578618,0.999990493670014,2,7,laminin complex,CC,L5 IT,nuclei,hypergeometric
[truncated: 4,818 more rows]

## Sheet: README
Table S2. GOseq results for marker genes (Intron&Exon, fold change > 1.5) in cortex cells and nuclei. Cell type is found in column ‘subclass’, assay in column ‘tech’ and statistical test in column ‘mode’.
