# Supplementary material for: Differences in molecular sampling and data processing explain variation among single-cell and single-nucleus RNA-seq experiments
Source: HighWire-hosted journal article supplement (doi:10.1101/gr.278253.123), 2024-02-01
Supplement: Supplemental_Table_S3.xlsx [file Supplemental_Table_S3.xlsx]

## Sheet: Supplemental_Table_S3
category,over_represented_pvalue,under_represented_pvalue,numDEInCat,numInCat,term,ontology,mode
GO:0022626,1.39442920682026e-85,1,74,90,cytosolic ribosome,CC,cell_exon_vs_cell_inex_goseq
GO:0002181,3.30743666202017e-77,1,77,133,cytoplasmic translation,BP,cell_exon_vs_cell_inex_goseq
GO:0003735,6.37925297210834e-64,1,74,144,structural constituent of ribosome,MF,cell_exon_vs_cell_inex_goseq
GO:0044391,3.30010087443495e-63,1,76,159,ribosomal subunit,CC,cell_exon_vs_cell_inex_goseq
GO:0005840,1.99687384692857e-61,1,79,197,ribosome,CC,cell_exon_vs_cell_inex_goseq
GO:0022625,5.29049649395036e-55,1,45,51,cytosolic large ribosomal subunit,CC,cell_exon_vs_cell_inex_goseq
GO:0005198,6.74617185162468e-53,1,82,356,structural molecule activity,MF,cell_exon_vs_cell_inex_goseq
GO:1990904,7.61474266875494e-52,1,99,585,ribonucleoprotein complex,CC,cell_exon_vs_cell_inex_goseq
GO:0006412,1.7698836042647e-51,1,95,557,translation,BP,cell_exon_vs_cell_inex_goseq
GO:0006518,3.30982467144093e-51,1,101,676,peptide metabolic process,BP,cell_exon_vs_cell_inex_goseq
GO:0043043,7.52234453143735e-51,1,95,572,peptide biosynthetic process,BP,cell_exon_vs_cell_inex_goseq
GO:0043604,1.05059994607314e-46,1,95,657,amide biosynthetic process,BP,cell_exon_vs_cell_inex_goseq
GO:0043603,1.15479955289691e-43,1,101,852,cellular amide metabolic process,BP,cell_exon_vs_cell_inex_goseq
GO:0003723,5.87809525923557e-43,1,123,1400,RNA binding,MF,cell_exon_vs_cell_inex_goseq
GO:0043230,1.09792694817685e-37,1,110,1339,extracellular organelle,CC,cell_exon_vs_cell_inex_goseq
GO:0065010,1.09792694817685e-37,1,110,1339,extracellular membrane-bounded organelle,CC,cell_exon_vs_cell_inex_goseq
GO:1903561,1.09792694817685e-37,1,110,1339,extracellular vesicle,CC,cell_exon_vs_cell_inex_goseq
GO:0015934,1.80791050454237e-37,1,46,100,large ribosomal subunit,CC,cell_exon_vs_cell_inex_goseq
GO:0070062,4.10073020420357e-37,1,109,1331,extracellular exosome,CC,cell_exon_vs_cell_inex_goseq
GO:0005925,3.11838539117567e-36,1,56,334,focal adhesion,CC,cell_exon_vs_cell_inex_goseq
GO:0030055,4.09249300517204e-36,1,56,337,cell-substrate junction,CC,cell_exon_vs_cell_inex_goseq
GO:0005615,5.5357210988842e-36,1,121,1650,extracellular space,CC,cell_exon_vs_cell_inex_goseq
GO:1901566,1.37595102081702e-35,1,105,1201,organonitrogen compound biosynthetic process,BP,cell_exon_vs_cell_inex_goseq
DAM,1.43830362939126e-34,1,52,211,,,cell_exon_vs_cell_inex_goseq
GO:0005576,5.63507373522121e-34,1,131,2007,extracellular region,CC,cell_exon_vs_cell_inex_goseq
GO:0031982,8.26774139034698e-34,1,138,2484,vesicle,CC,cell_exon_vs_cell_inex_goseq
GO:0022627,1.14611307280154e-32,1,30,38,cytosolic small ribosomal subunit,CC,cell_exon_vs_cell_inex_goseq
GO:0070161,7.42554166978858e-30,1,59,550,anchoring junction,CC,cell_exon_vs_cell_inex_goseq
GO:0032991,3.38045956250433e-28,1,164,3566,protein-containing complex,CC,cell_exon_vs_cell_inex_goseq
GO:0015935,2.10440790279306e-27,1,32,63,small ribosomal subunit,CC,cell_exon_vs_cell_inex_goseq
GO:0030054,2.38301492584849e-27,1,81,1230,cell junction,CC,cell_exon_vs_cell_inex_goseq
GO:0042788,2.0525946217581e-26,1,23,30,polysomal ribosome,CC,cell_exon_vs_cell_inex_goseq
GO:0003676,3.41796699502094e-26,1,141,2831,nucleic acid binding,MF,cell_exon_vs_cell_inex_goseq
GO:0005844,3.68847969866648e-26,1,27,59,polysome,CC,cell_exon_vs_cell_inex_goseq
GO:0010467,1.63014975867375e-25,1,169,3893,gene expression,BP,cell_exon_vs_cell_inex_goseq
GO:0005829,1.75380410746689e-25,1,158,3954,cytosol,CC,cell_exon_vs_cell_inex_goseq
GO:0005737,3.20963185864978e-23,1,236,7715,cytoplasm,CC,cell_exon_vs_cell_inex_goseq
GO:0009059,3.375221187781e-22,1,144,3226,macromolecule biosynthetic process,BP,cell_exon_vs_cell_inex_goseq
GO:0044271,4.81090484129764e-22,1,142,3125,cellular nitrogen compound biosynthetic process,BP,cell_exon_vs_cell_inex_goseq
GO:0034645,1.47706055249743e-21,1,142,3199,cellular macromolecule biosynthetic process,BP,cell_exon_vs_cell_inex_goseq
GO:0043228,3.89458788632518e-20,1,137,3330,non-membrane-bounded organelle,CC,cell_exon_vs_cell_inex_goseq
GO:0043232,3.89458788632518e-20,1,137,3330,intracellular non-membrane-bounded organelle,CC,cell_exon_vs_cell_inex_goseq
GO:0005488,4.86110273576575e-20,1,266,9681,binding,MF,cell_exon_vs_cell_inex_goseq
GO:0009058,5.3934485104463e-20,1,156,3912,biosynthetic process,BP,cell_exon_vs_cell_inex_goseq
GO:1901576,1.17675362132748e-19,1,154,3869,organic substance biosynthetic process,BP,cell_exon_vs_cell_inex_goseq
GO:0044249,1.28474473094527e-19,1,153,3821,cellular biosynthetic process,BP,cell_exon_vs_cell_inex_goseq
GO:0110165,2.55436168124443e-19,1,273,10314,cellular anatomical entity,CC,cell_exon_vs_cell_inex_goseq
GO:0005575,2.8732376200334e-19,1,274,10382,cellular_component,CC,cell_exon_vs_cell_inex_goseq
GO:0043226,9.23941735414547e-19,1,249,8878,organelle,CC,cell_exon_vs_cell_inex_goseq
GO:0005515,1.94577142247649e-18,1,248,8619,protein binding,MF,cell_exon_vs_cell_inex_goseq
GO:0044267,2.02597236195444e-18,1,133,3294,cellular protein metabolic process,BP,cell_exon_vs_cell_inex_goseq
GO:0016020,2.66498153090617e-18,1,174,5172,membrane,CC,cell_exon_vs_cell_inex_goseq
GO:0008150,2.81210622435142e-18,1,266,10001,biological_process,BP,cell_exon_vs_cell_inex_goseq
GO:0042221,2.8697919206397e-18,1,106,2311,response to chemical,BP,cell_exon_vs_cell_inex_goseq
GO:0003674,3.40988525238043e-18,1,272,10302,molecular_function,MF,cell_exon_vs_cell_inex_goseq
GO:0019538,3.77979096664774e-18,1,139,3568,protein metabolic process,BP,cell_exon_vs_cell_inex_goseq
GO:0097159,4.65750633147981e-18,1,152,4148,organic cyclic compound binding,MF,cell_exon_vs_cell_inex_goseq
GO:1901363,5.26549961742703e-18,1,151,4109,heterocyclic compound binding,MF,cell_exon_vs_cell_inex_goseq
GO:0043170,6.71172828136916e-18,1,196,6028,macromolecule metabolic process,BP,cell_exon_vs_cell_inex_goseq
GO:0009987,1.06918773063512e-17,1,259,9649,cellular process,BP,cell_exon_vs_cell_inex_goseq
GO:0043229,1.08219319314225e-17,1,242,8555,intracellular organelle,CC,cell_exon_vs_cell_inex_goseq
GO:0034641,1.51538865633841e-17,1,162,4287,cellular nitrogen compound metabolic process,BP,cell_exon_vs_cell_inex_goseq
GO:0002376,3.64319884672937e-17,1,85,1517,immune system process,BP,cell_exon_vs_cell_inex_goseq
GO:0050896,6.44641789816673e-17,1,160,4725,response to stimulus,BP,cell_exon_vs_cell_inex_goseq
GO:0005622,1.23093460071059e-16,1,254,9445,intracellular anatomical structure,CC,cell_exon_vs_cell_inex_goseq
GO:1901564,2.346287830908e-16,1,149,4139,organonitrogen compound metabolic process,BP,cell_exon_vs_cell_inex_goseq
GO:0043227,2.40392400032816e-16,1,239,8493,membrane-bounded organelle,CC,cell_exon_vs_cell_inex_goseq
GO:0019843,3.02954803697963e-16,1,21,58,rRNA binding,MF,cell_exon_vs_cell_inex_goseq
GO:0071704,3.91372729314345e-16,1,209,6896,organic substance metabolic process,BP,cell_exon_vs_cell_inex_goseq
GO:0008152,5.12231607681489e-16,1,216,7223,metabolic process,BP,cell_exon_vs_cell_inex_goseq
GO:0070887,5.66602362167632e-16,1,86,1769,cellular response to chemical stimulus,BP,cell_exon_vs_cell_inex_goseq
GO:0006955,5.02744806939527e-15,1,65,991,immune response,BP,cell_exon_vs_cell_inex_goseq
GO:0045202,5.26693350563741e-15,1,47,766,synapse,CC,cell_exon_vs_cell_inex_goseq
GO:0042255,7.70306500854009e-15,1,19,52,ribosome assembly,BP,cell_exon_vs_cell_inex_goseq
GO:0009607,8.97464629407774e-15,1,58,812,response to biotic stimulus,BP,cell_exon_vs_cell_inex_goseq
GO:0002682,1.44496581189624e-14,1,57,850,regulation of immune system process,BP,cell_exon_vs_cell_inex_goseq
GO:0044419,2.1579334679928e-14,1,60,898,biological process involved in interspecies interaction between organisms,BP,cell_exon_vs_cell_inex_goseq
GO:0044260,3.15482122915905e-14,1,169,5224,cellular macromolecule metabolic process,BP,cell_exon_vs_cell_inex_goseq
GO:0009605,3.25031131724365e-14,1,77,1479,response to external stimulus,BP,cell_exon_vs_cell_inex_goseq
GO:0043207,3.69739100109325e-14,1,56,784,response to external biotic stimulus,BP,cell_exon_vs_cell_inex_goseq
GO:0051707,3.69739100109325e-14,1,56,784,response to other organism,BP,cell_exon_vs_cell_inex_goseq
GO:0003729,4.82522241180621e-14,1,29,244,mRNA binding,MF,cell_exon_vs_cell_inex_goseq
GO:0022613,6.43283438893604e-14,1,40,387,ribonucleoprotein complex biogenesis,BP,cell_exon_vs_cell_inex_goseq
GO:0042611,8.95446104142389e-14,1,12,19,MHC protein complex,CC,cell_exon_vs_cell_inex_goseq
GO:0010033,9.12181332431314e-14,1,83,1803,response to organic substance,BP,cell_exon_vs_cell_inex_goseq
GO:0042254,1.34326839434401e-13,1,35,273,ribosome biogenesis,BP,cell_exon_vs_cell_inex_goseq
GO:0043231,2.00856227226211e-13,1,225,8015,intracellular membrane-bounded organelle,CC,cell_exon_vs_cell_inex_goseq
GO:0006952,4.96083626265812e-13,1,57,873,defense response,BP,cell_exon_vs_cell_inex_goseq
GO:0048002,9.14764386175949e-13,1,15,45,antigen processing and presentation of peptide antigen,BP,cell_exon_vs_cell_inex_goseq
GO:0044237,2.13835557743702e-12,1,198,6803,cellular metabolic process,BP,cell_exon_vs_cell_inex_goseq
GO:0071310,3.42452454728395e-12,1,67,1415,cellular response to organic substance,BP,cell_exon_vs_cell_inex_goseq
GO:0005634,3.64607256408921e-12,1,165,5235,nucleus,CC,cell_exon_vs_cell_inex_goseq
GO:0034622,4.36949235139423e-12,1,49,740,cellular protein-containing complex assembly,BP,cell_exon_vs_cell_inex_goseq
GO:0006807,7.78894694259181e-12,1,185,6250,nitrogen compound metabolic process,BP,cell_exon_vs_cell_inex_goseq
GO:0048584,9.91683023982059e-12,1,62,1234,positive regulation of response to stimulus,BP,cell_exon_vs_cell_inex_goseq
GO:0019882,1.05792813966048e-11,1,17,77,antigen processing and presentation,BP,cell_exon_vs_cell_inex_goseq
GO:0048518,1.0741429895245e-11,1,124,3714,positive regulation of biological process,BP,cell_exon_vs_cell_inex_goseq
GO:0012505,1.41014570340313e-11,1,106,3033,endomembrane system,CC,cell_exon_vs_cell_inex_goseq
GO:0042273,1.76707303477605e-11,1,17,65,ribosomal large subunit biogenesis,BP,cell_exon_vs_cell_inex_goseq
GO:0048522,1.86359778760338e-11,1,118,3467,positive regulation of cellular process,BP,cell_exon_vs_cell_inex_goseq
GO:0030666,2.176600669958e-11,1,20,133,endocytic vesicle membrane,CC,cell_exon_vs_cell_inex_goseq
GO:0044877,2.36305002275293e-11,1,49,923,protein-containing complex binding,MF,cell_exon_vs_cell_inex_goseq
GO:0022618,2.96941330202683e-11,1,22,161,ribonucleoprotein complex assembly,BP,cell_exon_vs_cell_inex_goseq
GO:0042127,3.07174552567935e-11,1,52,897,regulation of cell population proliferation,BP,cell_exon_vs_cell_inex_goseq
GO:0006950,3.43579093651033e-11,1,94,2337,response to stress,BP,cell_exon_vs_cell_inex_goseq
GO:0071826,4.27182950833688e-11,1,22,167,ribonucleoprotein complex subunit organization,BP,cell_exon_vs_cell_inex_goseq
GO:0045087,4.71649292618271e-11,1,37,464,innate immune response,BP,cell_exon_vs_cell_inex_goseq
GO:0065003,5.39422515898527e-11,1,57,1067,protein-containing complex assembly,BP,cell_exon_vs_cell_inex_goseq
GO:0044238,5.97583529003907e-11,1,187,6528,primary metabolic process,BP,cell_exon_vs_cell_inex_goseq
GO:0050776,9.59738367722324e-11,1,37,534,regulation of immune response,BP,cell_exon_vs_cell_inex_goseq
GO:0002252,9.96886674745883e-11,1,30,349,immune effector process,BP,cell_exon_vs_cell_inex_goseq
GO:0010941,1.08390480849375e-10,1,55,999,regulation of cell death,BP,cell_exon_vs_cell_inex_goseq
GO:0002495,1.31370324130937e-10,0.999999999995113,11,25,antigen processing and presentation of peptide antigen via MHC class II,BP,cell_exon_vs_cell_inex_goseq
GO:0140694,1.37723283609231e-10,1,25,273,non-membrane-bounded organelle assembly,BP,cell_exon_vs_cell_inex_goseq
GO:0002504,1.63862762375791e-10,0.999999999993667,11,26,antigen processing and presentation of peptide or polysaccharide antigen via MHC class II,BP,cell_exon_vs_cell_inex_goseq
GO:0043933,1.70694198325184e-10,1,60,1213,protein-containing complex subunit organization,BP,cell_exon_vs_cell_inex_goseq
GO:0050790,1.74469840853608e-10,1,66,1546,regulation of catalytic activity,BP,cell_exon_vs_cell_inex_goseq
GO:0042274,1.93794028294661e-10,0.999999999983348,16,67,ribosomal small subunit biogenesis,BP,cell_exon_vs_cell_inex_goseq
GO:0002478,2.20719882073149e-10,0.999999999990964,11,28,antigen processing and presentation of exogenous peptide antigen,BP,cell_exon_vs_cell_inex_goseq
GO:0098542,2.52250458236889e-10,1,41,579,defense response to other organism,BP,cell_exon_vs_cell_inex_goseq
GO:0010628,2.63638264289551e-10,1,43,697,positive regulation of gene expression,BP,cell_exon_vs_cell_inex_goseq
GO:0034097,3.06663682615138e-10,1,40,561,response to cytokine,BP,cell_exon_vs_cell_inex_goseq
GO:0031410,3.14445987485878e-10,1,67,1636,cytoplasmic vesicle,CC,cell_exon_vs_cell_inex_goseq
GO:0097708,3.216033398023e-10,1,67,1639,intracellular vesicle,CC,cell_exon_vs_cell_inex_goseq
GO:0071345,3.69979765820757e-10,1,37,489,cellular response to cytokine stimulus,BP,cell_exon_vs_cell_inex_goseq
GO:0002443,3.96692404031119e-10,1,24,226,leukocyte mediated immunity,BP,cell_exon_vs_cell_inex_goseq
GO:0043067,4.30737964081893e-10,1,51,920,regulation of programmed cell death,BP,cell_exon_vs_cell_inex_goseq
GO:0030139,5.65031253680455e-10,1,23,237,endocytic vesicle,CC,cell_exon_vs_cell_inex_goseq
GO:0005783,6.2428573459042e-10,1,60,1279,endoplasmic reticulum,CC,cell_exon_vs_cell_inex_goseq
GO:0042277,7.83044090711347e-10,0.999999999885685,20,175,peptide binding,MF,cell_exon_vs_cell_inex_goseq
GO:0002684,7.9807834476412e-10,1,36,515,positive regulation of immune system process,BP,cell_exon_vs_cell_inex_goseq
GO:0019884,8.92838392912668e-10,0.999999999956453,11,32,antigen processing and presentation of exogenous antigen,BP,cell_exon_vs_cell_inex_goseq
GO:0051246,1.01920519491817e-09,1,69,1687,regulation of protein metabolic process,BP,cell_exon_vs_cell_inex_goseq
GO:0008283,1.04621363435216e-09,1,53,1062,cell population proliferation,BP,cell_exon_vs_cell_inex_goseq
GO:0005768,1.34583489902202e-09,1,38,720,endosome,CC,cell_exon_vs_cell_inex_goseq
GO:0010608,1.3833952540569e-09,1,31,440,posttranscriptional regulation of gene expression,BP,cell_exon_vs_cell_inex_goseq
GO:0048523,1.39051039318073e-09,1,101,2967,negative regulation of cellular process,BP,cell_exon_vs_cell_inex_goseq
GO:0050865,1.45407336627978e-09,1,30,366,regulation of cell activation,BP,cell_exon_vs_cell_inex_goseq
GO:0042981,1.55399343290282e-09,1,49,899,regulation of apoptotic process,BP,cell_exon_vs_cell_inex_goseq
GO:0003730,2.11690784122885e-09,0.999999999822978,13,71,mRNA 3'-UTR binding,MF,cell_exon_vs_cell_inex_goseq
GO:0065008,2.37193259872447e-09,1,77,2130,regulation of biological quality,BP,cell_exon_vs_cell_inex_goseq
GO:0012501,2.41840752064761e-09,1,59,1236,programmed cell death,BP,cell_exon_vs_cell_inex_goseq
GO:0033218,2.50089108749592e-09,0.999999999617813,22,233,amide binding,MF,cell_exon_vs_cell_inex_goseq
GO:0098552,2.69115448733133e-09,0.999999999538743,25,303,side of membrane,CC,cell_exon_vs_cell_inex_goseq
GO:0042613,2.97749975131513e-09,0.999999999941906,8,13,MHC class II protein complex,CC,cell_exon_vs_cell_inex_goseq
GO:0048870,3.09484867494635e-09,1,43,909,cell motility,BP,cell_exon_vs_cell_inex_goseq
GO:0051674,3.09484867494635e-09,1,43,909,localization of cell,BP,cell_exon_vs_cell_inex_goseq
GO:0044085,3.20894112085625e-09,1,80,2117,cellular component biogenesis,BP,cell_exon_vs_cell_inex_goseq
GO:0048583,3.27715242390768e-09,1,82,2304,regulation of response to stimulus,BP,cell_exon_vs_cell_inex_goseq
GO:0065007,3.49141167862163e-09,1,183,6932,biological regulation,BP,cell_exon_vs_cell_inex_goseq
GO:0051716,3.61403127416566e-09,1,122,4051,cellular response to stimulus,BP,cell_exon_vs_cell_inex_goseq
GO:0006396,3.7405072979821e-09,1,46,784,RNA processing,BP,cell_exon_vs_cell_inex_goseq
GO:0032268,3.83894667546691e-09,1,65,1575,regulation of cellular protein metabolic process,BP,cell_exon_vs_cell_inex_goseq
GO:0008219,3.90249633258366e-09,1,61,1322,cell death,BP,cell_exon_vs_cell_inex_goseq
GO:0040011,3.98526144512817e-09,1,45,993,locomotion,BP,cell_exon_vs_cell_inex_goseq
GO:0002449,4.15839394345834e-09,0.999999999332017,20,168,lymphocyte mediated immunity,BP,cell_exon_vs_cell_inex_goseq
GO:0071840,4.38625953275314e-09,1,121,3972,cellular component organization or biogenesis,BP,cell_exon_vs_cell_inex_goseq
GO:0048519,5.123492127131e-09,1,106,3231,negative regulation of biological process,BP,cell_exon_vs_cell_inex_goseq
GO:0071556,5.76244923955258e-09,0.999999999774301,9,23,integral component of lumenal side of endoplasmic reticulum membrane,CC,cell_exon_vs_cell_inex_goseq
GO:0098553,5.76244923955258e-09,0.999999999774301,9,23,lumenal side of endoplasmic reticulum membrane,CC,cell_exon_vs_cell_inex_goseq
GO:0002694,6.28531342134212e-09,0.999999998787689,28,343,regulation of leukocyte activation,BP,cell_exon_vs_cell_inex_goseq
GO:1990948,6.56231298955045e-09,0.999999999957433,7,8,ubiquitin ligase inhibitor activity,MF,cell_exon_vs_cell_inex_goseq
GO:0019883,6.568105676079e-09,0.999999999817338,8,17,antigen processing and presentation of endogenous antigen,BP,cell_exon_vs_cell_inex_goseq
GO:0019886,7.73078104275432e-09,0.999999999698392,9,21,antigen processing and presentation of exogenous peptide antigen via MHC class II,BP,cell_exon_vs_cell_inex_goseq
GO:0001775,7.87393548408991e-09,1,39,637,cell activation,BP,cell_exon_vs_cell_inex_goseq
GO:0098794,8.67445813233651e-09,0.999999998472199,24,375,postsynapse,CC,cell_exon_vs_cell_inex_goseq
GO:0009719,9.42499335312433e-09,1,43,908,response to endogenous stimulus,BP,cell_exon_vs_cell_inex_goseq
GO:0016064,9.96874895650815e-09,0.999999998817747,15,87,immunoglobulin mediated immune response,BP,cell_exon_vs_cell_inex_goseq
GO:0019724,9.96874895650815e-09,0.999999998817747,15,87,B cell mediated immunity,BP,cell_exon_vs_cell_inex_goseq
GO:0042110,1.01030544755622e-08,0.999999997792702,26,315,T cell activation,BP,cell_exon_vs_cell_inex_goseq
GO:0006417,1.06932837390409e-08,0.999999997652441,26,336,regulation of translation,BP,cell_exon_vs_cell_inex_goseq
GO:0006928,1.09706781189659e-08,1,47,1142,movement of cell or subcellular component,BP,cell_exon_vs_cell_inex_goseq
GO:1901700,1.11212813966019e-08,1,48,994,response to oxygen-containing compound,BP,cell_exon_vs_cell_inex_goseq
GO:0060326,1.1532406482098e-08,0.99999999810172,19,161,cell chemotaxis,BP,cell_exon_vs_cell_inex_goseq
GO:0098609,1.15564550807692e-08,0.999999997599057,30,480,cell-cell adhesion,BP,cell_exon_vs_cell_inex_goseq
GO:0051338,1.18310708880056e-08,0.99999999731299,35,576,regulation of transferase activity,BP,cell_exon_vs_cell_inex_goseq
GO:0030141,1.22518137665995e-08,0.999999997258788,34,541,secretory granule,CC,cell_exon_vs_cell_inex_goseq
GO:0055105,1.48117669326842e-08,0.999999999825344,7,9,ubiquitin-protein transferase inhibitor activity,MF,cell_exon_vs_cell_inex_goseq
GO:0042605,1.50227682475808e-08,0.999999999519498,8,18,peptide antigen binding,MF,cell_exon_vs_cell_inex_goseq
GO:0006915,1.56388501508404e-08,1,56,1203,apoptotic process,BP,cell_exon_vs_cell_inex_goseq
GO:0065009,1.80317912966848e-08,1,71,1927,regulation of molecular function,BP,cell_exon_vs_cell_inex_goseq
GO:0010629,1.92583756970001e-08,0.9999999953627,38,680,negative regulation of gene expression,BP,cell_exon_vs_cell_inex_goseq
GO:0050789,2.00454888475405e-08,1,173,6556,regulation of biological process,BP,cell_exon_vs_cell_inex_goseq
GO:0060255,2.20080708434287e-08,1,120,3917,regulation of macromolecule metabolic process,BP,cell_exon_vs_cell_inex_goseq
GO:0006954,2.23442525067152e-08,0.999999994352025,30,408,inflammatory response,BP,cell_exon_vs_cell_inex_goseq
GO:0010008,2.23930337463672e-08,0.999999994880016,26,402,endosome membrane,CC,cell_exon_vs_cell_inex_goseq
GO:0012507,2.26502456539593e-08,0.999999998516429,10,47,ER to Golgi transport vesicle membrane,CC,cell_exon_vs_cell_inex_goseq
GO:0050839,2.37735702375233e-08,0.999999994882381,24,380,cell adhesion molecule binding,MF,cell_exon_vs_cell_inex_goseq
GO:0014069,2.45221061520626e-08,0.999999996009273,18,205,postsynaptic density,CC,cell_exon_vs_cell_inex_goseq
GO:0050794,2.51140536126459e-08,1,167,6300,regulation of cellular process,BP,cell_exon_vs_cell_inex_goseq
GO:0000027,2.60020668969416e-08,0.99999999882771,9,21,ribosomal large subunit assembly,BP,cell_exon_vs_cell_inex_goseq
GO:0032279,2.74320898955545e-08,0.999999995500194,18,208,asymmetric synapse,CC,cell_exon_vs_cell_inex_goseq
GO:0010605,2.88714382290002e-08,1,70,1805,negative regulation of macromolecule metabolic process,BP,cell_exon_vs_cell_inex_goseq
GO:0034248,2.90318617593321e-08,0.999999993102467,27,380,regulation of cellular amide metabolic process,BP,cell_exon_vs_cell_inex_goseq
GO:0019899,3.00923561088397e-08,1,58,1542,enzyme binding,MF,cell_exon_vs_cell_inex_goseq
GO:0071944,3.37502897825169e-08,1,86,2782,cell periphery,CC,cell_exon_vs_cell_inex_goseq
GO:0009617,3.66779987416267e-08,0.999999991229352,27,326,response to bacterium,BP,cell_exon_vs_cell_inex_goseq
GO:0050778,3.70133448509641e-08,0.999999991891783,24,314,positive regulation of immune response,BP,cell_exon_vs_cell_inex_goseq
GO:0043484,3.74171197362411e-08,0.999999994956756,15,117,regulation of RNA splicing,BP,cell_exon_vs_cell_inex_goseq
GO:0006959,3.88287821639049e-08,0.999999994941297,15,78,humoral immune response,BP,cell_exon_vs_cell_inex_goseq
GO:0006364,3.89418845809637e-08,0.999999991870187,23,203,rRNA processing,BP,cell_exon_vs_cell_inex_goseq
GO:0043069,4.01451728077107e-08,0.999999988699406,34,547,negative regulation of programmed cell death,BP,cell_exon_vs_cell_inex_goseq
GO:0032502,4.11258883748573e-08,1,103,3460,developmental process,BP,cell_exon_vs_cell_inex_goseq
GO:0098984,4.15154861177986e-08,0.999999992987325,18,220,neuron to neuron synapse,CC,cell_exon_vs_cell_inex_goseq
GO:1903039,4.32222771907592e-08,0.999999992649611,18,157,positive regulation of leukocyte cell-cell adhesion,BP,cell_exon_vs_cell_inex_goseq
GO:0009892,4.53912663975778e-08,1,73,1941,negative regulation of metabolic process,BP,cell_exon_vs_cell_inex_goseq
GO:0006909,4.84419219265656e-08,0.999999992668842,16,163,phagocytosis,BP,cell_exon_vs_cell_inex_goseq
GO:0002399,5.41144119605864e-08,0.999999998759721,7,12,MHC class II protein complex assembly,BP,cell_exon_vs_cell_inex_goseq
GO:0002503,5.41144119605864e-08,0.999999998759721,7,12,peptide antigen assembly with MHC class II protein complex,BP,cell_exon_vs_cell_inex_goseq
GO:0032501,5.52586209915604e-08,1,108,3713,multicellular organismal process,BP,cell_exon_vs_cell_inex_goseq
GO:0005886,5.75220345586753e-08,1,81,2604,plasma membrane,CC,cell_exon_vs_cell_inex_goseq
GO:0099572,5.96137463095185e-08,0.999999989696965,18,215,postsynaptic specialization,CC,cell_exon_vs_cell_inex_goseq
GO:0002460,6.17785447043333e-08,0.999999988548799,19,183,adaptive immune response based on somatic recombination of immune receptors built from immunoglobulin superfamily domains,BP,cell_exon_vs_cell_inex_goseq
GO:0002250,6.68855241239154e-08,0.999999985046438,23,265,adaptive immune response,BP,cell_exon_vs_cell_inex_goseq
GO:0098576,6.69552099080879e-08,0.999999996246986,9,28,lumenal side of membrane,CC,cell_exon_vs_cell_inex_goseq
GO:0016072,6.81606602895952e-08,0.999999984895629,23,211,rRNA metabolic process,BP,cell_exon_vs_cell_inex_goseq
GO:1904667,6.98577668989899e-08,0.999999998486753,7,11,negative regulation of ubiquitin protein ligase activity,BP,cell_exon_vs_cell_inex_goseq
GO:0007275,7.38187158782086e-08,1,88,2821,multicellular organism development,BP,cell_exon_vs_cell_inex_goseq
GO:0051240,7.92166247932087e-08,0.999999979569038,40,814,positive regulation of multicellular organismal process,BP,cell_exon_vs_cell_inex_goseq
GO:0045182,7.92947623813431e-08,0.999999989576079,14,111,translation regulator activity,MF,cell_exon_vs_cell_inex_goseq
GO:1903037,8.18978612380915e-08,0.999999983736168,20,208,regulation of leukocyte cell-cell adhesion,BP,cell_exon_vs_cell_inex_goseq
GO:0050870,8.55625793250695e-08,0.999999985681976,17,144,positive regulation of T cell activation,BP,cell_exon_vs_cell_inex_goseq
GO:0002483,8.91645266720943e-08,0.99999999739791,7,15,antigen processing and presentation of endogenous peptide antigen,BP,cell_exon_vs_cell_inex_goseq
GO:0014070,1.02956990952653e-07,0.999999969609806,32,554,response to organic cyclic compound,BP,cell_exon_vs_cell_inex_goseq
GO:0002696,1.03375156135984e-07,0.999999978187056,21,223,positive regulation of leukocyte activation,BP,cell_exon_vs_cell_inex_goseq
GO:0007159,1.04802916451469e-07,0.999999977815103,21,236,leukocyte cell-cell adhesion,BP,cell_exon_vs_cell_inex_goseq
GO:0045321,1.11896132103883e-07,0.999999965619268,34,563,leukocyte activation,BP,cell_exon_vs_cell_inex_goseq
GO:1901798,1.13711169816223e-07,0.999999995376591,8,17,positive regulation of signal transduction by p53 class mediator,BP,cell_exon_vs_cell_inex_goseq
GO:0031974,1.1704515645145e-07,1,127,4111,membrane-enclosed lumen,CC,cell_exon_vs_cell_inex_goseq
GO:0043233,1.1704515645145e-07,1,127,4111,organelle lumen,CC,cell_exon_vs_cell_inex_goseq
GO:0070013,1.1704515645145e-07,1,127,4111,intracellular organelle lumen,CC,cell_exon_vs_cell_inex_goseq
GO:0001817,1.18382659822814e-07,0.999999966371992,30,459,regulation of cytokine production,BP,cell_exon_vs_cell_inex_goseq
GO:0060548,1.18799270692981e-07,0.999999962742944,35,602,negative regulation of cell death,BP,cell_exon_vs_cell_inex_goseq
GO:0045296,1.26235549536199e-07,0.999999975192545,19,262,cadherin binding,MF,cell_exon_vs_cell_inex_goseq
GO:0033993,1.30307694362996e-07,0.999999961946794,31,511,response to lipid,BP,cell_exon_vs_cell_inex_goseq
GO:0030659,1.34875022174325e-07,0.999999958112769,37,812,cytoplasmic vesicle membrane,CC,cell_exon_vs_cell_inex_goseq
GO:0001816,1.38445219050016e-07,0.999999960366971,30,467,cytokine production,BP,cell_exon_vs_cell_inex_goseq
GO:1901796,1.44336714012674e-07,0.999999984186086,12,70,regulation of signal transduction by p53 class mediator,BP,cell_exon_vs_cell_inex_goseq
GO:0050867,1.9098720766445e-07,0.999999958108294,21,229,positive regulation of cell activation,BP,cell_exon_vs_cell_inex_goseq
GO:0048731,1.92810127183205e-07,1,82,2614,system development,BP,cell_exon_vs_cell_inex_goseq
GO:2001242,1.94908471194866e-07,0.999999967702555,16,127,regulation of intrinsic apoptotic signaling pathway,BP,cell_exon_vs_cell_inex_goseq
GO:0022409,1.96791607720775e-07,0.999999962519439,18,183,positive regulation of cell-cell adhesion,BP,cell_exon_vs_cell_inex_goseq
GO:0019222,1.99030242585736e-07,1,124,4239,regulation of metabolic process,BP,cell_exon_vs_cell_inex_goseq
GO:0023026,1.99598249714573e-07,0.999999990042229,8,23,MHC class II protein complex binding,MF,cell_exon_vs_cell_inex_goseq
GO:0012506,1.99712967538675e-07,0.999999933689539,37,828,vesicle membrane,CC,cell_exon_vs_cell_inex_goseq
GO:0051248,2.17597640160898e-07,0.99999992768295,37,705,negative regulation of protein metabolic process,BP,cell_exon_vs_cell_inex_goseq
GO:0000028,2.25840033259885e-07,0.999999989924631,8,17,ribosomal small subunit assembly,BP,cell_exon_vs_cell_inex_goseq
GO:0051348,2.27667144842267e-07,0.999999953776949,19,197,negative regulation of transferase activity,BP,cell_exon_vs_cell_inex_goseq
GO:0000323,2.30826885968682e-07,0.999999929900621,31,540,lytic vacuole,CC,cell_exon_vs_cell_inex_goseq
GO:0005764,2.30826885968682e-07,0.999999929900621,31,540,lysosome,CC,cell_exon_vs_cell_inex_goseq
GO:0051172,2.36519293229506e-07,1,60,1531,negative regulation of nitrogen compound metabolic process,BP,cell_exon_vs_cell_inex_goseq
GO:0043066,2.38396969835697e-07,0.999999926990501,32,534,negative regulation of apoptotic process,BP,cell_exon_vs_cell_inex_goseq
GO:0080134,2.4939071816138e-07,0.999999916889882,41,837,regulation of response to stress,BP,cell_exon_vs_cell_inex_goseq
GO:0002683,2.52415356460273e-07,0.999999940831092,22,266,negative regulation of immune system process,BP,cell_exon_vs_cell_inex_goseq
GO:0048856,2.52927526661846e-07,1,93,3140,anatomical structure development,BP,cell_exon_vs_cell_inex_goseq
GO:0002501,2.56065122827386e-07,0.999999991588049,7,14,peptide antigen assembly with MHC protein complex,BP,cell_exon_vs_cell_inex_goseq
GO:0051249,2.78310074067164e-07,0.999999931824097,23,290,regulation of lymphocyte activation,BP,cell_exon_vs_cell_inex_goseq
GO:0098797,2.79551324088026e-07,0.999999942039355,19,270,plasma membrane protein complex,CC,cell_exon_vs_cell_inex_goseq
GO:0007155,3.01630459306238e-07,0.999999899660679,36,795,cell adhesion,BP,cell_exon_vs_cell_inex_goseq
GO:0022610,3.30717449538557e-07,0.999999889559025,36,797,biological adhesion,BP,cell_exon_vs_cell_inex_goseq
GO:0016477,3.44001505895027e-07,0.999999883231245,37,828,cell migration,BP,cell_exon_vs_cell_inex_goseq
GO:0099503,3.54333347537755e-07,0.999999883655089,34,644,secretory vesicle,CC,cell_exon_vs_cell_inex_goseq
GO:0022407,3.74752719312254e-07,0.99999991324047,21,274,regulation of cell-cell adhesion,BP,cell_exon_vs_cell_inex_goseq
GO:0050863,3.94817151812527e-07,0.999999916639515,19,209,regulation of T cell activation,BP,cell_exon_vs_cell_inex_goseq
GO:0051179,4.03440773626312e-07,1,105,3698,localization,BP,cell_exon_vs_cell_inex_goseq
GO:0002396,4.22423089374964e-07,0.999999984374883,7,15,MHC protein complex assembly,BP,cell_exon_vs_cell_inex_goseq
GO:0019864,4.56829289162656e-07,0.999999997046182,5,6,IgG binding,MF,cell_exon_vs_cell_inex_goseq
GO:0010468,4.60579669053662e-07,1,97,3057,regulation of gene expression,BP,cell_exon_vs_cell_inex_goseq
GO:0006935,4.61382677391508e-07,0.999999887178831,22,315,chemotaxis,BP,cell_exon_vs_cell_inex_goseq
GO:0042330,4.70201050097579e-07,0.999999884878512,22,316,taxis,BP,cell_exon_vs_cell_inex_goseq
GO:0030595,4.79121488180061e-07,0.999999920263143,15,128,leukocyte chemotaxis,BP,cell_exon_vs_cell_inex_goseq
GO:0030234,4.82671456329569e-07,0.999999833887628,37,823,enzyme regulator activity,MF,cell_exon_vs_cell_inex_goseq
GO:0045637,4.88666059173177e-07,0.999999912458076,16,142,regulation of myeloid cell differentiation,BP,cell_exon_vs_cell_inex_goseq
GO:0001819,5.03623498273285e-07,0.999999872101631,23,299,positive regulation of cytokine production,BP,cell_exon_vs_cell_inex_goseq
GO:0051239,5.43866000743372e-07,0.999999833449138,56,1458,regulation of multicellular organismal process,BP,cell_exon_vs_cell_inex_goseq
GO:0044389,6.34087957598896e-07,0.999999854362921,20,262,ubiquitin-like protein ligase binding,MF,cell_exon_vs_cell_inex_goseq
GO:0010604,6.82179940078346e-07,1,74,2201,positive regulation of macromolecule metabolic process,BP,cell_exon_vs_cell_inex_goseq
GO:0009893,6.9331450153434e-07,1,78,2373,positive regulation of metabolic process,BP,cell_exon_vs_cell_inex_goseq
GO:0030097,7.1421580608283e-07,0.999999770975075,31,547,hemopoiesis,BP,cell_exon_vs_cell_inex_goseq
GO:0031981,7.63471034366157e-07,1,104,3381,nuclear lumen,CC,cell_exon_vs_cell_inex_goseq
GO:0042612,7.88717611602791e-07,0.999999991146888,5,7,MHC class I protein complex,CC,cell_exon_vs_cell_inex_goseq
GO:0002697,7.90826760676632e-07,0.999999841598997,17,203,regulation of immune effector process,BP,cell_exon_vs_cell_inex_goseq
GO:0031396,7.93770940977753e-07,0.99999985107742,16,167,regulation of protein ubiquitination,BP,cell_exon_vs_cell_inex_goseq
GO:0050900,8.15706190628855e-07,0.999999827341943,18,208,leukocyte migration,BP,cell_exon_vs_cell_inex_goseq
GO:0002699,9.40238666833569e-07,0.999999845222756,14,142,positive regulation of immune effector process,BP,cell_exon_vs_cell_inex_goseq
GO:1904666,0.00000109873626540276,0.999999947644509,7,19,regulation of ubiquitin protein ligase activity,BP,cell_exon_vs_cell_inex_goseq
GO:0032269,0.00000111175145878252,0.999999615357743,34,659,negative regulation of cellular protein metabolic process,BP,cell_exon_vs_cell_inex_goseq
GO:0043085,0.0000011141302775913,0.9999996118929,34,739,positive regulation of catalytic activity,BP,cell_exon_vs_cell_inex_goseq
GO:0051444,0.00000112674579792754,0.999999947185766,7,18,negative regulation of ubiquitin-protein transferase activity,BP,cell_exon_vs_cell_inex_goseq
GO:0070997,0.00000119320567356759,0.999999726333364,19,244,neuron death,BP,cell_exon_vs_cell_inex_goseq
GO:0031625,0.00000127614312766808,0.999999705655921,19,251,ubiquitin protein ligase binding,MF,cell_exon_vs_cell_inex_goseq
GO:0051251,0.00000128060729112236,0.999999720362353,18,197,positive regulation of lymphocyte activation,BP,cell_exon_vs_cell_inex_goseq
GO:0048534,0.00000129292631847925,0.999999571190143,31,566,hematopoietic or lymphoid organ development,BP,cell_exon_vs_cell_inex_goseq
GO:0001916,0.00000129631186634878,0.999999956151773,6,15,positive regulation of T cell mediated cytotoxicity,BP,cell_exon_vs_cell_inex_goseq
GO:0023023,0.00000130176409891747,0.999999910272017,8,30,MHC protein complex binding,MF,cell_exon_vs_cell_inex_goseq
GO:0072331,0.00000133275673905113,0.999999775733063,14,122,signal transduction by p53 class mediator,BP,cell_exon_vs_cell_inex_goseq
GO:1903320,0.00000135200828900998,0.999999718268406,17,196,regulation of protein modification by small protein conjugation or removal,BP,cell_exon_vs_cell_inex_goseq
GO:0070848,0.00000138028114517742,0.999999624164056,23,389,response to growth factor,BP,cell_exon_vs_cell_inex_goseq
GO:0097193,0.00000138671591923691,0.999999679661151,19,223,intrinsic apoptotic signaling pathway,BP,cell_exon_vs_cell_inex_goseq
GO:0004857,0.00000143010501606179,0.999999872998443,9,43,enzyme inhibitor activity,MF,cell_exon_vs_cell_inex_goseq
GO:0010942,0.00000148651322894481,0.999999557577696,26,398,positive regulation of cell death,BP,cell_exon_vs_cell_inex_goseq
GO:0043086,0.0000015099995014332,0.999999526984316,28,458,negative regulation of catalytic activity,BP,cell_exon_vs_cell_inex_goseq
GO:0002520,0.00000154754963917329,0.999999472036761,32,610,immune system development,BP,cell_exon_vs_cell_inex_goseq
GO:0098772,0.00000161478185188432,0.999999362500947,45,1067,molecular function regulator,MF,cell_exon_vs_cell_inex_goseq
GO:0008284,0.00000165886080332567,0.999999477162916,28,481,positive regulation of cell population proliferation,BP,cell_exon_vs_cell_inex_goseq
GO:0030099,0.00000166779814914178,0.999999590649251,20,268,myeloid cell differentiation,BP,cell_exon_vs_cell_inex_goseq
GO:0034774,0.00000168084886333784,0.999999606390397,19,224,secretory granule lumen,CC,cell_exon_vs_cell_inex_goseq
GO:0048027,0.00000169189165304557,0.999999910957186,7,21,mRNA 5'-UTR binding,MF,cell_exon_vs_cell_inex_goseq
GO:0046649,0.00000169706058807486,0.999999464767136,28,469,lymphocyte activation,BP,cell_exon_vs_cell_inex_goseq
GO:0001912,0.00000178214818681885,0.999999899342715,7,27,positive regulation of leukocyte mediated cytotoxicity,BP,cell_exon_vs_cell_inex_goseq
GO:0031983,0.00000180606479810448,0.999999574789474,19,226,vesicle lumen,CC,cell_exon_vs_cell_inex_goseq
GO:0060205,0.00000180606479810448,0.999999574789474,19,226,cytoplasmic vesicle lumen,CC,cell_exon_vs_cell_inex_goseq
GO:0022607,0.00000185724584933934,0.999999393598435,64,1887,cellular component assembly,BP,cell_exon_vs_cell_inex_goseq
GO:0030662,0.00000199405400241418,0.999999677672318,13,128,coated vesicle membrane,CC,cell_exon_vs_cell_inex_goseq
GO:0030134,0.00000203375903125669,0.999999769653208,10,70,COPII-coated ER to Golgi transport vesicle,CC,cell_exon_vs_cell_inex_goseq
GO:0071363,0.00000208931825804699,0.999999435454099,22,370,cellular response to growth factor stimulus,BP,cell_exon_vs_cell_inex_goseq
GO:1903706,0.00000218391549594675,0.99999945583385,20,244,regulation of hemopoiesis,BP,cell_exon_vs_cell_inex_goseq
GO:0031329,0.00000229565779617002,0.999999200640549,32,648,regulation of cellular catabolic process,BP,cell_exon_vs_cell_inex_goseq
GO:0001906,0.00000242894140567899,0.999999643530933,12,85,cell killing,BP,cell_exon_vs_cell_inex_goseq
GO:0030154,0.00000262571989924153,0.999998870678223,71,2253,cell differentiation,BP,cell_exon_vs_cell_inex_goseq
GO:0005730,0.00000272036651467918,0.999998949674534,39,781,nucleolus,CC,cell_exon_vs_cell_inex_goseq
GO:0032640,0.00000278395584082723,0.999999539527198,13,111,tumor necrosis factor production,BP,cell_exon_vs_cell_inex_goseq
GO:0032680,0.00000278395584082723,0.999999539527198,13,111,regulation of tumor necrosis factor production,BP,cell_exon_vs_cell_inex_goseq
GO:0050727,0.00000281732552567736,0.999999348145857,18,199,regulation of inflammatory response,BP,cell_exon_vs_cell_inex_goseq
GO:0055106,0.00000299949971265693,0.999999836396784,7,18,ubiquitin-protein transferase regulator activity,MF,cell_exon_vs_cell_inex_goseq
GO:1901214,0.00000316325221886731,0.999999294715797,17,212,regulation of neuron death,BP,cell_exon_vs_cell_inex_goseq
GO:0005791,0.00000326650736114846,0.999999616326858,10,58,rough endoplasmic reticulum,CC,cell_exon_vs_cell_inex_goseq
GO:0048869,0.00000329377478468914,0.999998570604309,72,2312,cellular developmental process,BP,cell_exon_vs_cell_inex_goseq
GO:0005765,0.00000345401464782439,0.999999104246701,20,321,lysosomal membrane,CC,cell_exon_vs_cell_inex_goseq
GO:0098852,0.00000345401464782439,0.999999104246701,20,321,lytic vacuole membrane,CC,cell_exon_vs_cell_inex_goseq
GO:0031324,0.00000371112901614976,0.999998456219809,60,1639,negative regulation of cellular metabolic process,BP,cell_exon_vs_cell_inex_goseq
GO:0009894,0.00000382589589426976,0.999998584571492,34,738,regulation of catabolic process,BP,cell_exon_vs_cell_inex_goseq
GO:0031960,0.00000383607310968122,0.999999409680275,12,87,response to corticosteroid,BP,cell_exon_vs_cell_inex_goseq
GO:0005773,0.00000386132829192465,0.999998642957927,31,609,vacuole,CC,cell_exon_vs_cell_inex_goseq
GO:0002366,0.00000387628535946294,0.99999921991819,15,179,leukocyte activation involved in immune response,BP,cell_exon_vs_cell_inex_goseq
GO:0006413,0.00000392268951367915,0.999999388252415,12,102,translational initiation,BP,cell_exon_vs_cell_inex_goseq
GO:0002263,0.00000408661222782396,0.999999173366643,15,182,cell activation involved in immune response,BP,cell_exon_vs_cell_inex_goseq
GO:0071706,0.00000416169691782939,0.999999283627754,13,115,tumor necrosis factor superfamily cytokine production,BP,cell_exon_vs_cell_inex_goseq
GO:1903555,0.00000416169691782939,0.999999283627754,13,115,regulation of tumor necrosis factor superfamily cytokine production,BP,cell_exon_vs_cell_inex_goseq
GO:0070661,0.00000453308567001508,0.999998964175036,17,194,leukocyte proliferation,BP,cell_exon_vs_cell_inex_goseq
GO:0042592,0.00000465784756800023,0.999998113665968,41,994,homeostatic process,BP,cell_exon_vs_cell_inex_goseq
GO:0070663,0.00000468359636477538,0.999999048746414,15,153,regulation of leukocyte proliferation,BP,cell_exon_vs_cell_inex_goseq
GO:0044092,0.00000476759741045272,0.999998220188466,34,665,negative regulation of molecular function,BP,cell_exon_vs_cell_inex_goseq
GO:0032103,0.00000484828370808064,0.99999877073853,19,252,positive regulation of response to external stimulus,BP,cell_exon_vs_cell_inex_goseq
GO:0016043,0.00000489065379114381,0.9999977086842,105,3791,cellular component organization,BP,cell_exon_vs_cell_inex_goseq
GO:0001913,0.00000495566641821647,0.999999667595709,7,29,T cell mediated cytotoxicity,BP,cell_exon_vs_cell_inex_goseq
GO:0017148,0.00000526025731617376,0.99999906258946,13,147,negative regulation of translation,BP,cell_exon_vs_cell_inex_goseq
GO:0031343,0.00000534699438580435,0.999999632825822,7,31,positive regulation of cell killing,BP,cell_exon_vs_cell_inex_goseq
GO:0034249,0.0000054228607064492,0.999998950812362,14,167,negative regulation of cellular amide metabolic process,BP,cell_exon_vs_cell_inex_goseq
GO:0032101,0.00000555888427327079,0.999998084400786,29,544,regulation of response to external stimulus,BP,cell_exon_vs_cell_inex_goseq
GO:0032879,0.00000557097975473008,0.999997471261183,54,1608,regulation of localization,BP,cell_exon_vs_cell_inex_goseq
GO:1902531,0.00000563374130860531,0.999997652268072,43,1113,regulation of intracellular signal transduction,BP,cell_exon_vs_cell_inex_goseq
GO:0050793,0.00000577405645941759,0.999997446199908,50,1398,regulation of developmental process,BP,cell_exon_vs_cell_inex_goseq
GO:0036464,0.00000592816186039214,0.999998840001811,14,182,cytoplasmic ribonucleoprotein granule,CC,cell_exon_vs_cell_inex_goseq
GO:0002275,0.00000616899979940652,0.999999315364536,9,61,myeloid cell activation involved in immune response,BP,cell_exon_vs_cell_inex_goseq
GO:0002484,0.00000628578299508502,0.999999956796709,4,5,antigen processing and presentation of endogenous peptide antigen via MHC class I via ER pathway,BP,cell_exon_vs_cell_inex_goseq
GO:0002486,0.00000628578299508502,0.999999956796709,4,5,"antigen processing and presentation of endogenous peptide antigen via MHC class I via ER pathway, TAP-independent",BP,cell_exon_vs_cell_inex_goseq
GO:0032944,0.00000646900112902982,0.999998737141761,14,143,regulation of mononuclear cell proliferation,BP,cell_exon_vs_cell_inex_goseq
GO:0050670,0.00000646900112902982,0.999998737141761,14,143,regulation of lymphocyte proliferation,BP,cell_exon_vs_cell_inex_goseq
GO:0097529,0.00000657417388647486,0.999998815401088,13,120,myeloid leukocyte migration,BP,cell_exon_vs_cell_inex_goseq
GO:0003823,0.00000694884396698628,0.999999375876024,8,36,antigen binding,MF,cell_exon_vs_cell_inex_goseq
GO:0034470,0.00000742636169131971,0.999997638388766,25,347,ncRNA processing,BP,cell_exon_vs_cell_inex_goseq
GO:0031397,0.00000776151957987393,0.999998977829627,10,67,negative regulation of protein ubiquitination,BP,cell_exon_vs_cell_inex_goseq
GO:0035556,0.00000801525702321922,0.999996381453299,56,1711,intracellular signal transduction,BP,cell_exon_vs_cell_inex_goseq
GO:0034612,0.00000820292139644511,0.999998145856149,16,164,response to tumor necrosis factor,BP,cell_exon_vs_cell_inex_goseq
GO:0048545,0.00000889471198679495,0.999997957126272,16,207,response to steroid hormone,BP,cell_exon_vs_cell_inex_goseq
GO:0071495,0.00000946662825260411,0.99999650003621,31,765,cellular response to endogenous stimulus,BP,cell_exon_vs_cell_inex_goseq
GO:0071356,0.00000949014992066346,0.999997956224347,15,147,cellular response to tumor necrosis factor,BP,cell_exon_vs_cell_inex_goseq
GO:0031347,0.00000972162604120743,0.999997012449863,23,364,regulation of defense response,BP,cell_exon_vs_cell_inex_goseq
GO:0005770,0.0000102756220467303,0.999997737880669,15,216,late endosome,CC,cell_exon_vs_cell_inex_goseq
GO:0030670,0.0000109407845189043,0.999998696087129,9,60,phagocytic vesicle membrane,CC,cell_exon_vs_cell_inex_goseq
GO:0045335,0.0000110689722809036,0.999998246004637,11,110,phagocytic vesicle,CC,cell_exon_vs_cell_inex_goseq
GO:1902533,0.0000111891143967862,0.999995910835254,30,610,positive regulation of intracellular signal transduction,BP,cell_exon_vs_cell_inex_goseq
GO:0019865,0.0000116551655257606,0.999999631777313,5,11,immunoglobulin binding,MF,cell_exon_vs_cell_inex_goseq
GO:0042116,0.0000117169457580515,0.999998372589988,10,71,macrophage activation,BP,cell_exon_vs_cell_inex_goseq
GO:0045785,0.0000117208310479453,0.999996948423828,18,276,positive regulation of cell adhesion,BP,cell_exon_vs_cell_inex_goseq
GO:0009986,0.0000117323229786529,0.999996448035228,22,391,cell surface,CC,cell_exon_vs_cell_inex_goseq
GO:0002474,0.0000124658004781009,0.999999297270141,6,21,antigen processing and presentation of peptide antigen via MHC class I,BP,cell_exon_vs_cell_inex_goseq
GO:0002548,0.000012499318221312,0.999998786219685,8,35,monocyte chemotaxis,BP,cell_exon_vs_cell_inex_goseq
GO:0048513,0.0000129967007244288,0.999993722569967,60,1821,animal organ development,BP,cell_exon_vs_cell_inex_goseq
GO:1903050,0.0000130786546731321,0.999997079612485,15,178,regulation of proteolysis involved in cellular protein catabolic process,BP,cell_exon_vs_cell_inex_goseq
GO:0030155,0.0000136848226094762,0.999995679651516,23,457,regulation of cell adhesion,BP,cell_exon_vs_cell_inex_goseq
GO:0001914,0.0000148272469865006,0.999999119831201,6,23,regulation of T cell mediated cytotoxicity,BP,cell_exon_vs_cell_inex_goseq
GO:0140678,0.00001489863647338,0.999997857817163,10,77,molecular function inhibitor activity,MF,cell_exon_vs_cell_inex_goseq
GO:0032943,0.0000163871498132146,0.999996267376053,15,179,mononuclear cell proliferation,BP,cell_exon_vs_cell_inex_goseq
GO:0046651,0.0000163871498132146,0.999996267376053,15,179,lymphocyte proliferation,BP,cell_exon_vs_cell_inex_goseq
GO:1904813,0.0000179792580599161,0.999997008005502,11,102,ficolin-1-rich granule lumen,CC,cell_exon_vs_cell_inex_goseq
GO:2001233,0.0000179995764852148,0.999995171387184,18,249,regulation of apoptotic signaling pathway,BP,cell_exon_vs_cell_inex_goseq
GO:0051438,0.0000183773720491638,0.999998059807145,8,43,regulation of ubiquitin-protein transferase activity,BP,cell_exon_vs_cell_inex_goseq
GO:0019885,0.0000186034474111131,0.999999297125759,5,13,antigen processing and presentation of endogenous peptide antigen via MHC class I,BP,cell_exon_vs_cell_inex_goseq
GO:0070925,0.0000188665346257995,0.999993428168689,26,612,organelle assembly,BP,cell_exon_vs_cell_inex_goseq
GO:0005766,0.0000190588664436395,0.999996476123944,12,121,primary lysosome,CC,cell_exon_vs_cell_inex_goseq
GO:0042582,0.0000190588664436395,0.999996476123944,12,121,azurophil granule,CC,cell_exon_vs_cell_inex_goseq
GO:0101002,0.000019287165322453,0.999996107060531,13,147,ficolin-1-rich granule,CC,cell_exon_vs_cell_inex_goseq
GO:0051272,0.000019415371695575,0.999994305536436,20,347,positive regulation of cellular component movement,BP,cell_exon_vs_cell_inex_goseq
GO:0070371,0.0000196157045871192,0.999995459090991,15,181,ERK1 and ERK2 cascade,BP,cell_exon_vs_cell_inex_goseq
GO:2000425,0.0000199205241004271,0.999999661910523,4,7,regulation of apoptotic cell clearance,BP,cell_exon_vs_cell_inex_goseq
GO:0071407,0.00002064530118868,0.99999391117042,20,365,cellular response to organic cyclic compound,BP,cell_exon_vs_cell_inex_goseq
GO:0051270,0.0000213784620761156,0.999992338723064,27,610,regulation of cellular component movement,BP,cell_exon_vs_cell_inex_goseq
GO:0005774,0.0000220706592681971,0.999993462215375,20,358,vacuolar membrane,CC,cell_exon_vs_cell_inex_goseq
GO:0071396,0.000022576130566696,0.999993307133601,20,345,cellular response to lipid,BP,cell_exon_vs_cell_inex_goseq
GO:0002705,0.0000234843190488439,0.99999684685654,9,79,positive regulation of leukocyte mediated immunity,BP,cell_exon_vs_cell_inex_goseq
GO:0050764,0.0000234871642188641,0.99999734239294,8,61,regulation of phagocytosis,BP,cell_exon_vs_cell_inex_goseq
GO:1903321,0.0000245542757937907,0.999996264703591,10,74,negative regulation of protein modification by small protein conjugation or removal,BP,cell_exon_vs_cell_inex_goseq
GO:2000145,0.0000249021956487406,0.999991187558348,26,573,regulation of cell motility,BP,cell_exon_vs_cell_inex_goseq
GO:0098588,0.0000255839731748435,0.999987808761601,50,1476,bounding membrane of organelle,CC,cell_exon_vs_cell_inex_goseq
GO:0006810,0.0000260623168344864,0.999985969907918,79,2741,transport,BP,cell_exon_vs_cell_inex_goseq
GO:0035770,0.000028475733397344,0.99999355081021,14,199,ribonucleoprotein granule,CC,cell_exon_vs_cell_inex_goseq
GO:0045657,0.00003012539903142,0.999999363051694,4,8,positive regulation of monocyte differentiation,BP,cell_exon_vs_cell_inex_goseq
GO:0032642,0.0000314930848130465,0.999995685902546,9,62,regulation of chemokine production,BP,cell_exon_vs_cell_inex_goseq
GO:0006979,0.0000318384326851091,0.999990346065745,20,312,response to oxidative stress,BP,cell_exon_vs_cell_inex_goseq
GO:0023052,0.0000319160512207368,0.999982218040437,91,3340,signaling,BP,cell_exon_vs_cell_inex_goseq
GO:0051234,0.0000321818135309518,0.99998246983757,81,2837,establishment of localization,BP,cell_exon_vs_cell_inex_goseq
GO:0097435,0.0000323892896679851,0.999989456812206,22,483,supramolecular fiber organization,BP,cell_exon_vs_cell_inex_goseq
GO:0007154,0.0000328686306764853,0.999981448913719,92,3376,cell communication,BP,cell_exon_vs_cell_inex_goseq
GO:2000026,0.0000342573936913316,0.999986024695404,33,747,regulation of multicellular organismal development,BP,cell_exon_vs_cell_inex_goseq
GO:0051384,0.0000346856057351995,0.999994484046836,10,77,response to glucocorticoid,BP,cell_exon_vs_cell_inex_goseq
GO:0031386,0.0000348798901985254,0.999998687815102,5,10,protein tag,MF,cell_exon_vs_cell_inex_goseq
GO:0032602,0.0000352219968832799,0.999995097490589,9,63,chemokine production,BP,cell_exon_vs_cell_inex_goseq
GO:0051171,0.0000357681051908655,0.999979437530438,101,3577,regulation of nitrogen compound metabolic process,BP,cell_exon_vs_cell_inex_goseq
GO:0045639,0.0000364196000582388,0.999994860989502,9,71,positive regulation of myeloid cell differentiation,BP,cell_exon_vs_cell_inex_goseq
GO:0005853,0.000036983101138158,1,3,3,eukaryotic translation elongation factor 1 complex,CC,cell_exon_vs_cell_inex_goseq
GO:0001774,0.0000383509862617014,0.999996354640352,7,34,microglial cell activation,BP,cell_exon_vs_cell_inex_goseq
GO:0098581,0.0000388631307002353,0.99999890099134,4,13,detection of external biotic stimulus,BP,cell_exon_vs_cell_inex_goseq
GO:0001910,0.0000395575088364285,0.999996110128761,7,43,regulation of leukocyte mediated cytotoxicity,BP,cell_exon_vs_cell_inex_goseq
GO:0002424,0.0000397139775943019,0.999999553039667,3,8,T cell mediated immune response to tumor cell,BP,cell_exon_vs_cell_inex_goseq
GO:0031349,0.0000397871705329029,0.999990762002769,14,166,positive regulation of defense response,BP,cell_exon_vs_cell_inex_goseq
GO:0098556,0.0000402211361799135,0.999999550974299,4,5,cytoplasmic side of rough endoplasmic reticulum membrane,CC,cell_exon_vs_cell_inex_goseq
GO:0080090,0.0000408920940703403,0.999976328629276,103,3681,regulation of primary metabolic process,BP,cell_exon_vs_cell_inex_goseq
GO:0031323,0.0000419973235433369,0.999975531308596,107,3846,regulation of cellular metabolic process,BP,cell_exon_vs_cell_inex_goseq
GO:0040012,0.0000420361839214502,0.999984629962857,26,593,regulation of locomotion,BP,cell_exon_vs_cell_inex_goseq
GO:0032760,0.0000422109442941626,0.999993927747289,9,71,positive regulation of tumor necrosis factor production,BP,cell_exon_vs_cell_inex_goseq
GO:1901216,0.0000424586435250788,0.999993887431692,9,71,positive regulation of neuron death,BP,cell_exon_vs_cell_inex_goseq
GO:0002761,0.000042754207611302,0.999993014473312,10,79,regulation of myeloid leukocyte differentiation,BP,cell_exon_vs_cell_inex_goseq
GO:0002440,0.0000431166471143669,0.999991261617003,12,140,production of molecular mediator of immune response,BP,cell_exon_vs_cell_inex_goseq
GO:0009967,0.0000438125086180192,0.999981147608444,36,903,positive regulation of signal transduction,BP,cell_exon_vs_cell_inex_goseq
GO:1903362,0.0000464441890379338,0.999988342433342,15,205,regulation of cellular protein catabolic process,BP,cell_exon_vs_cell_inex_goseq
GO:0051050,0.0000465055388970762,0.999983266055614,25,550,positive regulation of transport,BP,cell_exon_vs_cell_inex_goseq
GO:0001909,0.0000468809022406339,0.999993184293591,9,68,leukocyte mediated cytotoxicity,BP,cell_exon_vs_cell_inex_goseq
GO:2000147,0.0000475944540106031,0.999985596365415,19,339,positive regulation of cell motility,BP,cell_exon_vs_cell_inex_goseq
GO:0043068,0.0000479195538812067,0.999984513763273,21,356,positive regulation of programmed cell death,BP,cell_exon_vs_cell_inex_goseq
GO:1902105,0.0000481908947371914,0.999987906175939,15,185,regulation of leukocyte differentiation,BP,cell_exon_vs_cell_inex_goseq
GO:0010647,0.0000507387022779072,0.999977498941876,38,997,positive regulation of cell communication,BP,cell_exon_vs_cell_inex_goseq
GO:0002253,0.0000538221956357503,0.999987053846413,14,202,activation of immune response,BP,cell_exon_vs_cell_inex_goseq
GO:0002764,0.0000551835914567372,0.999984408558762,17,287,immune response-regulating signaling pathway,BP,cell_exon_vs_cell_inex_goseq
GO:0031399,0.0000554049950552517,0.99997557524274,37,986,regulation of protein modification process,BP,cell_exon_vs_cell_inex_goseq
GO:0002347,0.0000555065560968556,0.99999690019032,5,24,response to tumor cell,BP,cell_exon_vs_cell_inex_goseq
GO:0002521,0.0000558201750943415,0.999981758526972,21,359,leukocyte differentiation,BP,cell_exon_vs_cell_inex_goseq
GO:0044093,0.0000562017562161585,0.999975488760527,36,965,positive regulation of molecular function,BP,cell_exon_vs_cell_inex_goseq
GO:0023056,0.0000563617836367727,0.999974873136287,38,1004,positive regulation of signaling,BP,cell_exon_vs_cell_inex_goseq
GO:0050729,0.0000564872406471966,0.999990445086966,10,80,positive regulation of inflammatory response,BP,cell_exon_vs_cell_inex_goseq
GO:0034660,0.0000580213328578374,0.999978933733286,25,414,ncRNA metabolic process,BP,cell_exon_vs_cell_inex_goseq
GO:0008143,0.0000595291261799311,0.999997992636076,4,17,poly(A) binding,MF,cell_exon_vs_cell_inex_goseq
GO:1903557,0.0000605217706671218,0.999990844663736,9,74,positive regulation of tumor necrosis factor superfamily cytokine production,BP,cell_exon_vs_cell_inex_goseq
GO:0042102,0.0000612612598647021,0.999990774036105,9,68,positive regulation of T cell proliferation,BP,cell_exon_vs_cell_inex_goseq
GO:0040017,0.0000614992500936637,0.999981009303944,19,347,positive regulation of locomotion,BP,cell_exon_vs_cell_inex_goseq
GO:0008380,0.0000642126399714663,0.99997944923179,20,343,RNA splicing,BP,cell_exon_vs_cell_inex_goseq
GO:0042270,0.000064662425663862,0.999999583373847,3,4,protection from natural killer cell mediated cytotoxicity,BP,cell_exon_vs_cell_inex_goseq
GO:0002711,0.0000647279971166269,0.999994653950952,6,34,positive regulation of T cell mediated immunity,BP,cell_exon_vs_cell_inex_goseq
GO:0002468,0.0000658335635066166,0.999998472766664,4,7,dendritic cell antigen processing and presentation,BP,cell_exon_vs_cell_inex_goseq
GO:0042129,0.0000676041149406639,0.999986888488774,11,112,regulation of T cell proliferation,BP,cell_exon_vs_cell_inex_goseq
GO:0097190,0.000067851084632258,0.999976217859047,23,416,apoptotic signaling pathway,BP,cell_exon_vs_cell_inex_goseq
GO:0042608,0.0000679332759798718,0.999997982273243,4,10,T cell receptor binding,MF,cell_exon_vs_cell_inex_goseq
GO:0051651,0.0000686739566157665,0.999986561888466,11,131,maintenance of location in cell,BP,cell_exon_vs_cell_inex_goseq
GO:0070181,0.000068808812861284,0.999998194458893,4,8,small ribosomal subunit rRNA binding,MF,cell_exon_vs_cell_inex_goseq
GO:0002456,0.0000709601753102311,0.999990525229301,8,67,T cell mediated immunity,BP,cell_exon_vs_cell_inex_goseq
GO:0005775,0.0000749816939718471,0.999985312179107,11,108,vacuolar lumen,CC,cell_exon_vs_cell_inex_goseq
GO:0032395,0.0000750185130689588,0.999998198732678,4,7,MHC class II receptor activity,MF,cell_exon_vs_cell_inex_goseq
GO:0002709,0.0000750807267363472,0.999991682290229,7,51,regulation of T cell mediated immunity,BP,cell_exon_vs_cell_inex_goseq
GO:0032946,0.0000759363785100249,0.999986600707018,10,88,positive regulation of mononuclear cell proliferation,BP,cell_exon_vs_cell_inex_goseq
GO:0050671,0.0000759363785100249,0.999986600707018,10,88,positive regulation of lymphocyte proliferation,BP,cell_exon_vs_cell_inex_goseq
GO:0031902,0.0000768952340297406,0.999986209723409,10,117,late endosome membrane,CC,cell_exon_vs_cell_inex_goseq
GO:0030593,0.0000788667619975819,0.99998948631057,8,54,neutrophil chemotaxis,BP,cell_exon_vs_cell_inex_goseq
GO:0060699,0.0000790438413418098,0.999999454460967,3,4,regulation of endoribonuclease activity,BP,cell_exon_vs_cell_inex_goseq
GO:0071385,0.000079150796784078,0.99999326849486,6,32,cellular response to glucocorticoid stimulus,BP,cell_exon_vs_cell_inex_goseq
GO:0008154,0.0000803637859237484,0.999983871562521,11,160,actin polymerization or depolymerization,BP,cell_exon_vs_cell_inex_goseq
GO:0070180,0.0000815190949571133,0.999998344046448,4,6,large ribosomal subunit rRNA binding,MF,cell_exon_vs_cell_inex_goseq
GO:0009725,0.0000815519028149181,0.999970943180183,23,516,response to hormone,BP,cell_exon_vs_cell_inex_goseq
GO:0042742,0.0000864537327295479,0.999981405815413,12,104,defense response to bacterium,BP,cell_exon_vs_cell_inex_goseq
GO:0002763,0.000086459476771363,0.999990521547391,7,37,positive regulation of myeloid leukocyte differentiation,BP,cell_exon_vs_cell_inex_goseq
GO:0030334,0.0000897790325140416,0.99996701800918,24,544,regulation of cell migration,BP,cell_exon_vs_cell_inex_goseq
GO:0003785,0.0000901979488478914,0.999994788469274,5,17,actin monomer binding,MF,cell_exon_vs_cell_inex_goseq
GO:0042098,0.0000911554144681928,0.999980018882003,12,136,T cell proliferation,BP,cell_exon_vs_cell_inex_goseq
GO:0016045,0.0000927050931275403,0.999998542143575,3,9,detection of bacterium,BP,cell_exon_vs_cell_inex_goseq
GO:0043549,0.0000933248651801417,0.999966468810383,23,488,regulation of kinase activity,BP,cell_exon_vs_cell_inex_goseq
GO:0055094,0.0000940941943640441,0.999994201234993,5,22,response to lipoprotein particle,BP,cell_exon_vs_cell_inex_goseq
GO:2000058,0.0000942031151895744,0.999980872220594,11,134,regulation of ubiquitin-dependent protein catabolic process,BP,cell_exon_vs_cell_inex_goseq
GO:0043065,0.0000961237745975873,0.999968283128521,20,346,positive regulation of apoptotic process,BP,cell_exon_vs_cell_inex_goseq
GO:0030658,0.0000963812659401322,0.999982153128414,10,130,transport vesicle membrane,CC,cell_exon_vs_cell_inex_goseq
GO:0002703,0.0000983547288878942,0.999979901416397,11,139,regulation of leukocyte mediated immunity,BP,cell_exon_vs_cell_inex_goseq
GO:0002274,0.000100240461350968,0.999977755838422,12,143,myeloid leukocyte activation,BP,cell_exon_vs_cell_inex_goseq
GO:0030335,0.000102627244648572,0.999968172959989,18,332,positive regulation of cell migration,BP,cell_exon_vs_cell_inex_goseq
GO:0010959,0.000103066020923196,0.999975164113533,13,198,regulation of metal ion transport,BP,cell_exon_vs_cell_inex_goseq
GO:0002821,0.000104077123704807,0.9999852361218,8,72,positive regulation of adaptive immune response,BP,cell_exon_vs_cell_inex_goseq
GO:0019730,0.000104302460774086,0.999988955294144,7,25,antimicrobial humoral response,BP,cell_exon_vs_cell_inex_goseq
GO:0032069,0.000104877931974643,0.999993383738988,5,22,regulation of nuclease activity,BP,cell_exon_vs_cell_inex_goseq
GO:0006414,0.00010704060248197,0.999987529795175,7,47,translational elongation,BP,cell_exon_vs_cell_inex_goseq
GO:0030162,0.000110110834847489,0.999959087026779,24,470,regulation of proteolysis,BP,cell_exon_vs_cell_inex_goseq
GO:0019900,0.000110163727767556,0.999959885808243,23,552,kinase binding,MF,cell_exon_vs_cell_inex_goseq
GO:0071402,0.000111937088275062,0.999992733448654,5,24,cellular response to lipoprotein particle stimulus,BP,cell_exon_vs_cell_inex_goseq
GO:0071384,0.000114074513441937,0.999989542048575,6,34,cellular response to corticosteroid stimulus,BP,cell_exon_vs_cell_inex_goseq
GO:0003779,0.000114702452110708,0.99997008451461,14,282,actin binding,MF,cell_exon_vs_cell_inex_goseq
GO:0071346,0.000118430758277101,0.999980392226909,9,75,cellular response to interferon-gamma,BP,cell_exon_vs_cell_inex_goseq
GO:1901701,0.000119433912138002,0.999950731331289,29,720,cellular response to oxygen-containing compound,BP,cell_exon_vs_cell_inex_goseq
GO:0051094,0.000120162956218893,0.999950396451424,29,739,positive regulation of developmental process,BP,cell_exon_vs_cell_inex_goseq
GO:0004602,0.000120769668697571,0.999992826578757,5,15,glutathione peroxidase activity,MF,cell_exon_vs_cell_inex_goseq
GO:0031341,0.000121687618029379,0.999985418672194,7,51,regulation of cell killing,BP,cell_exon_vs_cell_inex_goseq
GO:0070665,0.000125646134729747,0.999976318305323,10,94,positive regulation of leukocyte proliferation,BP,cell_exon_vs_cell_inex_goseq
GO:1903311,0.000127688718743836,0.999966510611759,14,230,regulation of mRNA metabolic process,BP,cell_exon_vs_cell_inex_goseq
GO:0048514,0.000131202022065177,0.999958474445663,18,337,blood vessel morphogenesis,BP,cell_exon_vs_cell_inex_goseq
GO:0002381,0.000132460974033746,0.999983880138917,7,52,immunoglobulin production involved in immunoglobulin-mediated immune response,BP,cell_exon_vs_cell_inex_goseq
GO:0030041,0.000132622374443475,0.999974392893554,10,139,actin filament polymerization,BP,cell_exon_vs_cell_inex_goseq
GO:0050920,0.000136213509912943,0.999971205829996,11,127,regulation of chemotaxis,BP,cell_exon_vs_cell_inex_goseq
GO:2001243,0.000136472180037232,0.999976970123619,9,75,negative regulation of intrinsic apoptotic signaling pathway,BP,cell_exon_vs_cell_inex_goseq
GO:0034341,0.000138118943590201,0.999973707243583,10,91,response to interferon-gamma,BP,cell_exon_vs_cell_inex_goseq
GO:0050866,0.000139004372972108,0.99997055659331,11,126,negative regulation of cell activation,BP,cell_exon_vs_cell_inex_goseq
GO:0090079,0.000139353172542175,0.999976205421518,9,87,"translation regulator activity, nucleic acid binding",MF,cell_exon_vs_cell_inex_goseq
GO:0002377,0.000139710902089125,0.999976167187363,9,85,immunoglobulin production,BP,cell_exon_vs_cell_inex_goseq
GO:0045595,0.000140490634424344,0.99993720780822,34,879,regulation of cell differentiation,BP,cell_exon_vs_cell_inex_goseq
GO:0001540,0.000140851033590845,0.999982540269082,7,58,amyloid-beta binding,MF,cell_exon_vs_cell_inex_goseq
GO:0050678,0.000142802096967751,0.99996688706059,12,167,regulation of epithelial cell proliferation,BP,cell_exon_vs_cell_inex_goseq
GO:0009595,0.000143147960210327,0.999993862076753,4,18,detection of biotic stimulus,BP,cell_exon_vs_cell_inex_goseq
GO:0080135,0.000150159932251697,0.999944235604052,23,486,regulation of cellular response to stress,BP,cell_exon_vs_cell_inex_goseq
GO:0050673,0.000160070063067664,0.999959673880904,13,194,epithelial cell proliferation,BP,cell_exon_vs_cell_inex_goseq
GO:0032722,0.000160174876892063,0.99998006628944,7,47,positive regulation of chemokine production,BP,cell_exon_vs_cell_inex_goseq
GO:1900153,0.000162793740178074,0.999993467975466,4,12,"positive regulation of nuclear-transcribed mRNA catabolic process, deadenylation-dependent decay",BP,cell_exon_vs_cell_inex_goseq
GO:0001568,0.000164216053965541,0.999945128621045,19,383,blood vessel development,BP,cell_exon_vs_cell_inex_goseq
GO:0051258,0.000166861437876148,0.999957625417487,13,222,protein polymerization,BP,cell_exon_vs_cell_inex_goseq
GO:0016458,0.000176578771753346,0.999964660950227,10,140,gene silencing,BP,cell_exon_vs_cell_inex_goseq
GO:0048024,0.00018005487607771,0.999972159174641,8,79,"regulation of mRNA splicing, via spliceosome",BP,cell_exon_vs_cell_inex_goseq
GO:0042176,0.000180761152580931,0.999943491763477,17,300,regulation of protein catabolic process,BP,cell_exon_vs_cell_inex_goseq
GO:0010646,0.000182025288171788,0.999901068918644,58,1988,regulation of cell communication,BP,cell_exon_vs_cell_inex_goseq
GO:0035239,0.000184314819406129,0.999933922577031,21,466,tube morphogenesis,BP,cell_exon_vs_cell_inex_goseq
GO:0071621,0.000185504184261094,0.999971569855106,8,64,granulocyte chemotaxis,BP,cell_exon_vs_cell_inex_goseq
GO:0009897,0.000190083772136636,0.999954671891252,12,152,external side of plasma membrane,CC,cell_exon_vs_cell_inex_goseq
GO:0051641,0.00019106659674582,0.999895942068024,58,2000,cellular localization,BP,cell_exon_vs_cell_inex_goseq
GO:0030669,0.000191910766261627,0.99997534701569,7,48,clathrin-coated endocytic vesicle membrane,CC,cell_exon_vs_cell_inex_goseq
GO:0098883,0.00019200698743875,0.999993389060928,4,8,synapse pruning,BP,cell_exon_vs_cell_inex_goseq
GO:0051049,0.000193818174038852,0.999910683329933,35,1009,regulation of transport,BP,cell_exon_vs_cell_inex_goseq
GO:0043254,0.00019815461467761,0.999939930774682,16,318,regulation of protein-containing complex assembly,BP,cell_exon_vs_cell_inex_goseq
GO:0023051,0.000203424496714407,0.999888922485533,58,2000,regulation of signaling,BP,cell_exon_vs_cell_inex_goseq
GO:0006958,0.000208005168266212,0.999985818257994,5,16,"complement activation, classical pathway",BP,cell_exon_vs_cell_inex_goseq
GO:0051402,0.000209136209960376,0.999949488648238,12,162,neuron apoptotic process,BP,cell_exon_vs_cell_inex_goseq
GO:0005654,0.000210445382654698,0.999873511349226,89,3138,nucleoplasm,CC,cell_exon_vs_cell_inex_goseq
GO:0140375,0.0002118916879161,0.999966876152954,8,64,immune receptor activity,MF,cell_exon_vs_cell_inex_goseq
GO:0009653,0.000218113004644029,0.999891686999946,42,1441,anatomical structure morphogenesis,BP,cell_exon_vs_cell_inex_goseq
GO:0007165,0.000218518628410874,0.999870120672361,83,3093,signal transduction,BP,cell_exon_vs_cell_inex_goseq
GO:0030001,0.000221112613819,0.999926673433264,18,408,metal ion transport,BP,cell_exon_vs_cell_inex_goseq
GO:0070717,0.000224728955777455,0.999988727438131,4,23,poly-purine tract binding,MF,cell_exon_vs_cell_inex_goseq
GO:0043021,0.000225064516079695,0.999949412921749,11,136,ribonucleoprotein complex binding,MF,cell_exon_vs_cell_inex_goseq
GO:0002708,0.000226345947027845,0.99996949331597,7,63,positive regulation of lymphocyte mediated immunity,BP,cell_exon_vs_cell_inex_goseq
GO:0098543,0.000228214815006639,0.999994945462102,3,10,detection of other organism,BP,cell_exon_vs_cell_inex_goseq
GO:0051592,0.000233248629031277,0.999962467611524,8,81,response to calcium ion,BP,cell_exon_vs_cell_inex_goseq
GO:0050766,0.000236129289059133,0.999974768989724,6,40,positive regulation of phagocytosis,BP,cell_exon_vs_cell_inex_goseq
GO:0051235,0.000236476221993961,0.999937848049866,13,207,maintenance of location,BP,cell_exon_vs_cell_inex_goseq
GO:1990266,0.000236848660318626,0.999962395947492,8,63,neutrophil migration,BP,cell_exon_vs_cell_inex_goseq
GO:1900151,0.000243058793588173,0.999988459006288,4,15,"regulation of nuclear-transcribed mRNA catabolic process, deadenylation-dependent decay",BP,cell_exon_vs_cell_inex_goseq
GO:0072562,0.000243708587660578,0.999967693531754,7,44,blood microparticle,CC,cell_exon_vs_cell_inex_goseq
GO:1902107,0.00024600060144176,0.999949227731073,10,107,positive regulation of leukocyte differentiation,BP,cell_exon_vs_cell_inex_goseq
GO:1903708,0.00024600060144176,0.999949227731073,10,107,positive regulation of hemopoiesis,BP,cell_exon_vs_cell_inex_goseq
GO:0032635,0.000247737878040296,0.999949071095783,10,97,interleukin-6 production,BP,cell_exon_vs_cell_inex_goseq
GO:0032675,0.000247737878040296,0.999949071095783,10,97,regulation of interleukin-6 production,BP,cell_exon_vs_cell_inex_goseq
GO:0008135,0.000250113392582699,0.999959641700207,8,71,"translation factor activity, RNA binding",MF,cell_exon_vs_cell_inex_goseq
GO:0033119,0.000257936383752132,0.999980060766697,5,23,negative regulation of RNA splicing,BP,cell_exon_vs_cell_inex_goseq
GO:0010558,0.000258157945755569,0.99987663013902,37,1007,negative regulation of macromolecule biosynthetic process,BP,cell_exon_vs_cell_inex_goseq
GO:0010631,0.000261114193629529,0.99993971076763,11,181,epithelial cell migration,BP,cell_exon_vs_cell_inex_goseq
GO:0090132,0.000261114193629529,0.99993971076763,11,181,epithelium migration,BP,cell_exon_vs_cell_inex_goseq
GO:0032071,0.000264524557682264,0.999994315182475,3,8,regulation of endodeoxyribonuclease activity,BP,cell_exon_vs_cell_inex_goseq
GO:0051015,0.000267461288676097,0.999949093696108,9,140,actin filament binding,MF,cell_exon_vs_cell_inex_goseq
GO:0090130,0.000267978691594114,0.999937926675604,11,182,tissue migration,BP,cell_exon_vs_cell_inex_goseq
GO:0032270,0.000268304222046589,0.999875589607166,34,920,positive regulation of cellular protein metabolic process,BP,cell_exon_vs_cell_inex_goseq
GO:0016070,0.000276798580001429,0.999831909584311,89,3051,RNA metabolic process,BP,cell_exon_vs_cell_inex_goseq
GO:0002573,0.000285428044037849,0.99993396569891,11,139,myeloid leukocyte differentiation,BP,cell_exon_vs_cell_inex_goseq
GO:0001944,0.00028776179863333,0.999899292875253,19,407,vasculature development,BP,cell_exon_vs_cell_inex_goseq
GO:0045655,0.000289881292804565,0.999985819228004,4,14,regulation of monocyte differentiation,BP,cell_exon_vs_cell_inex_goseq
GO:0031226,0.000290041970228676,0.999879709372867,26,677,intrinsic component of plasma membrane,CC,cell_exon_vs_cell_inex_goseq
GO:0030135,0.000297212079147411,0.999919948382868,13,211,coated vesicle,CC,cell_exon_vs_cell_inex_goseq
GO:0019901,0.000299680421646591,0.999891381920155,20,487,protein kinase binding,MF,cell_exon_vs_cell_inex_goseq
GO:0048585,0.000302367868981012,0.999857243449749,35,951,negative regulation of response to stimulus,BP,cell_exon_vs_cell_inex_goseq
GO:1902903,0.00030484185601661,0.999912544109789,14,272,regulation of supramolecular fiber organization,BP,cell_exon_vs_cell_inex_goseq
GO:0032611,0.000307131707797762,0.999949295705957,8,63,interleukin-1 beta production,BP,cell_exon_vs_cell_inex_goseq
GO:0032651,0.000307131707797762,0.999949295705957,8,63,regulation of interleukin-1 beta production,BP,cell_exon_vs_cell_inex_goseq
GO:0050684,0.000310194577579684,0.999940253022453,9,111,regulation of mRNA processing,BP,cell_exon_vs_cell_inex_goseq
GO:0060627,0.00032230832860896,0.999897666097419,16,357,regulation of vesicle-mediated transport,BP,cell_exon_vs_cell_inex_goseq
GO:0007015,0.00032857942632229,0.999904861029281,14,296,actin filament organization,BP,cell_exon_vs_cell_inex_goseq
GO:0030665,0.00033047338530671,0.999944126388682,8,77,clathrin-coated vesicle membrane,CC,cell_exon_vs_cell_inex_goseq
GO:0051247,0.000334840585814313,0.999840952755857,35,981,positive regulation of protein metabolic process,BP,cell_exon_vs_cell_inex_goseq
GO:0043277,0.000340437044179441,0.999970587499566,5,34,apoptotic cell clearance,BP,cell_exon_vs_cell_inex_goseq
GO:0010243,0.000360647003643726,0.999848249253622,26,666,response to organonitrogen compound,BP,cell_exon_vs_cell_inex_goseq
GO:0036002,0.000361613350229471,0.999969023232262,5,28,pre-mRNA binding,MF,cell_exon_vs_cell_inex_goseq
GO:0071674,0.000365942596922999,0.999920454686796,10,110,mononuclear cell migration,BP,cell_exon_vs_cell_inex_goseq
GO:0009966,0.00036670174872123,0.999799572189605,53,1787,regulation of signal transduction,BP,cell_exon_vs_cell_inex_goseq
GO:0005080,0.000375764608036292,0.999966640902413,5,36,protein kinase C binding,MF,cell_exon_vs_cell_inex_goseq
GO:0097305,0.000377864398439219,0.99990930637436,11,153,response to alcohol,BP,cell_exon_vs_cell_inex_goseq
GO:0031400,0.000385902552517859,0.999861903873416,19,368,negative regulation of protein modification process,BP,cell_exon_vs_cell_inex_goseq
GO:0062208,0.000387458500433364,0.999965891393009,5,31,positive regulation of pattern recognition receptor signaling pathway,BP,cell_exon_vs_cell_inex_goseq
GO:0002281,0.00039673787753787,0.999978536703983,4,15,macrophage activation involved in immune response,BP,cell_exon_vs_cell_inex_goseq
GO:0045334,0.000406427064353839,0.999939938584857,7,58,clathrin-coated endocytic vesicle,CC,cell_exon_vs_cell_inex_goseq
GO:0042802,0.000408934161876736,0.999785935669296,45,1324,identical protein binding,MF,cell_exon_vs_cell_inex_goseq
GO:0034142,0.000409300271094791,0.999964135940982,5,27,toll-like receptor 4 signaling pathway,BP,cell_exon_vs_cell_inex_goseq
GO:0031047,0.00040956036312099,0.99992755734931,8,100,gene silencing by RNA,BP,cell_exon_vs_cell_inex_goseq
GO:0070374,0.000412210406406475,0.999908775247685,10,117,positive regulation of ERK1 and ERK2 cascade,BP,cell_exon_vs_cell_inex_goseq
GO:0030881,0.000414488153949541,0.999991174156673,3,6,beta-2-microglobulin binding,MF,cell_exon_vs_cell_inex_goseq
GO:0002824,0.000415571627412304,0.999937727746832,7,68,positive regulation of adaptive immune response based on somatic recombination of immune receptors built from immunoglobulin superfamily domains,BP,cell_exon_vs_cell_inex_goseq
GO:0009890,0.000423700920815213,0.999789909179491,38,1065,negative regulation of biosynthetic process,BP,cell_exon_vs_cell_inex_goseq
GO:0002286,0.00042896932721477,0.99993537627204,7,68,T cell activation involved in immune response,BP,cell_exon_vs_cell_inex_goseq
GO:0031333,0.000432057827527231,0.999922832967229,8,104,negative regulation of protein-containing complex assembly,BP,cell_exon_vs_cell_inex_goseq
GO:0035578,0.000433246545439789,0.999924183297382,8,69,azurophil granule lumen,CC,cell_exon_vs_cell_inex_goseq
GO:0071216,0.000440212031697027,0.99988463848208,12,155,cellular response to biotic stimulus,BP,cell_exon_vs_cell_inex_goseq
GO:0035767,0.000441440584830769,0.999975071454835,4,16,endothelial cell chemotaxis,BP,cell_exon_vs_cell_inex_goseq
GO:0002282,0.000444260951612955,0.999994425966632,3,4,microglial cell activation involved in immune response,BP,cell_exon_vs_cell_inex_goseq
GO:0071383,0.000445844304406842,0.999909039414959,9,136,cellular response to steroid hormone stimulus,BP,cell_exon_vs_cell_inex_goseq
GO:0034123,0.000447863730976697,0.999973556760665,4,20,positive regulation of toll-like receptor signaling pathway,BP,cell_exon_vs_cell_inex_goseq
GO:0098973,0.000448162250553251,1,2,2,structural constituent of postsynaptic actin cytoskeleton,MF,cell_exon_vs_cell_inex_goseq
GO:0003746,0.000448709785832299,0.99997533150588,4,14,translation elongation factor activity,MF,cell_exon_vs_cell_inex_goseq
GO:0030217,0.000450936602545227,0.999881145051946,12,170,T cell differentiation,BP,cell_exon_vs_cell_inex_goseq
GO:1901222,0.000464345676354051,0.999917731131819,8,71,regulation of NIK/NF-kappaB signaling,BP,cell_exon_vs_cell_inex_goseq
GO:0031348,0.000466677863918625,0.999885408470021,11,142,negative regulation of defense response,BP,cell_exon_vs_cell_inex_goseq
GO:0035195,0.000467050149693358,0.999928143613967,7,77,gene silencing by miRNA,BP,cell_exon_vs_cell_inex_goseq
GO:1903131,0.000470064596675761,0.999846192567859,16,280,mononuclear cell differentiation,BP,cell_exon_vs_cell_inex_goseq
GO:0032930,0.000481429251031291,0.999972174175634,4,16,positive regulation of superoxide anion generation,BP,cell_exon_vs_cell_inex_goseq
GO:0004601,0.000487467491969478,0.999942762292684,6,28,peroxidase activity,MF,cell_exon_vs_cell_inex_goseq
GO:0070372,0.000494246333663803,0.999868391768567,12,169,regulation of ERK1 and ERK2 cascade,BP,cell_exon_vs_cell_inex_goseq
GO:0002237,0.000497228241539664,0.999851109563106,14,207,response to molecule of bacterial origin,BP,cell_exon_vs_cell_inex_goseq
GO:0030176,0.000505020433196527,0.99987507203056,11,134,integral component of endoplasmic reticulum membrane,CC,cell_exon_vs_cell_inex_goseq
GO:0048872,0.000524604009055212,0.999858813813681,12,193,homeostasis of number of cells,BP,cell_exon_vs_cell_inex_goseq
GO:1903312,0.000532037777202672,0.999916680788382,7,71,negative regulation of mRNA metabolic process,BP,cell_exon_vs_cell_inex_goseq
GO:1901361,0.000535751164109207,0.999808838935696,18,362,organic cyclic compound catabolic process,BP,cell_exon_vs_cell_inex_goseq
GO:0098554,0.000541555259973078,0.999968683709312,4,14,cytoplasmic side of endoplasmic reticulum membrane,CC,cell_exon_vs_cell_inex_goseq
GO:0032102,0.000546040585690746,0.999834626159681,14,221,negative regulation of response to external stimulus,BP,cell_exon_vs_cell_inex_goseq
GO:0071219,0.000554188267099805,0.999861395612338,11,133,cellular response to molecule of bacterial origin,BP,cell_exon_vs_cell_inex_goseq
GO:0048255,0.000565810150885419,0.99994462898248,5,39,mRNA stabilization,BP,cell_exon_vs_cell_inex_goseq
GO:0002437,0.000566243930480261,0.999928406885812,6,41,inflammatory response to antigenic stimulus,BP,cell_exon_vs_cell_inex_goseq
GO:0044403,0.000567912047586376,0.999836380621396,13,198,biological process involved in symbiotic interaction,BP,cell_exon_vs_cell_inex_goseq
GO:1901698,0.000570022865955588,0.999748306045126,27,712,response to nitrogen compound,BP,cell_exon_vs_cell_inex_goseq
GO:0060700,0.000581195357811941,0.999982833815884,3,9,regulation of ribonuclease activity,BP,cell_exon_vs_cell_inex_goseq
GO:0016032,0.00058376396626137,0.999797356159285,17,320,viral process,BP,cell_exon_vs_cell_inex_goseq
GO:0097530,0.00058556138889503,0.999892155721531,8,75,granulocyte migration,BP,cell_exon_vs_cell_inex_goseq
GO:0002224,0.000588297864148625,0.999890664510676,8,88,toll-like receptor signaling pathway,BP,cell_exon_vs_cell_inex_goseq
GO:0002698,0.00059922045285353,0.999904647077076,7,66,negative regulation of immune effector process,BP,cell_exon_vs_cell_inex_goseq
GO:2000427,0.000604704417140517,0.999985315386152,3,6,positive regulation of apoptotic cell clearance,BP,cell_exon_vs_cell_inex_goseq
GO:0031647,0.000607356086639587,0.999813671825498,14,239,regulation of protein stability,BP,cell_exon_vs_cell_inex_goseq
GO:0032928,0.000608939463741331,0.999961641699198,4,18,regulation of superoxide anion generation,BP,cell_exon_vs_cell_inex_goseq
GO:0072676,0.000614609850789468,0.999902587005115,7,58,lymphocyte migration,BP,cell_exon_vs_cell_inex_goseq
GO:0005200,0.000614660206592806,0.999919330991182,6,54,structural constituent of cytoskeleton,MF,cell_exon_vs_cell_inex_goseq
GO:0032612,0.000620416256926053,0.999884805090797,8,74,interleukin-1 production,BP,cell_exon_vs_cell_inex_goseq
GO:0032652,0.000620416256926053,0.999884805090797,8,74,regulation of interleukin-1 production,BP,cell_exon_vs_cell_inex_goseq
GO:0043618,0.000622780646372569,0.999919805486151,6,41,regulation of transcription from RNA polymerase II promoter in response to stress,BP,cell_exon_vs_cell_inex_goseq
GO:0043488,0.000623589553360612,0.999866938698337,9,128,regulation of mRNA stability,BP,cell_exon_vs_cell_inex_goseq
GO:0042325,0.000624960308798216,0.999717879117908,28,769,regulation of phosphorylation,BP,cell_exon_vs_cell_inex_goseq
GO:0031227,0.000629560683771538,0.999839818545961,11,139,intrinsic component of endoplasmic reticulum membrane,CC,cell_exon_vs_cell_inex_goseq
GO:0005887,0.000630650652434012,0.999733959529436,24,648,integral component of plasma membrane,CC,cell_exon_vs_cell_inex_goseq
GO:0002706,0.000637962055245682,0.999879475871363,8,96,regulation of lymphocyte mediated immunity,BP,cell_exon_vs_cell_inex_goseq
GO:0016684,0.00064163274169938,0.999919088986129,6,32,"oxidoreductase activity, acting on peroxide as acceptor",MF,cell_exon_vs_cell_inex_goseq
GO:0006812,0.000648341808316008,0.999731638663221,23,577,cation transport,BP,cell_exon_vs_cell_inex_goseq
GO:0000302,0.000655935213239428,0.999819984705188,12,158,response to reactive oxygen species,BP,cell_exon_vs_cell_inex_goseq
GO:0002579,0.0006564835915211,0.999986167873145,3,5,positive regulation of antigen processing and presentation,BP,cell_exon_vs_cell_inex_goseq
GO:0019372,0.000661973131349153,0.999986011409574,3,5,lipoxygenase pathway,BP,cell_exon_vs_cell_inex_goseq
GO:0046977,0.000664747757052288,0.999981583729801,3,7,TAP binding,MF,cell_exon_vs_cell_inex_goseq
GO:0032731,0.000678743185554036,0.999911138335868,6,41,positive regulation of interleukin-1 beta production,BP,cell_exon_vs_cell_inex_goseq
GO:0048646,0.000685115404813671,0.999715075143044,23,605,anatomical structure formation involved in morphogenesis,BP,cell_exon_vs_cell_inex_goseq
GO:0031325,0.000688441460548316,0.999598728941224,61,2097,positive regulation of cellular metabolic process,BP,cell_exon_vs_cell_inex_goseq
GO:0001525,0.000690291898178277,0.999774766479097,15,288,angiogenesis,BP,cell_exon_vs_cell_inex_goseq
GO:0003727,0.000699552437643089,0.999904685683173,6,67,single-stranded RNA binding,MF,cell_exon_vs_cell_inex_goseq
GO:0009888,0.000705793542692607,0.999661177999468,32,935,tissue development,BP,cell_exon_vs_cell_inex_goseq
GO:0043269,0.000714345726549998,0.999765822147421,15,308,regulation of ion transport,BP,cell_exon_vs_cell_inex_goseq
GO:0032870,0.000714404173608616,0.999765099298138,15,367,cellular response to hormone stimulus,BP,cell_exon_vs_cell_inex_goseq
GO:0044265,0.000714846510353863,0.999652820110798,33,902,cellular macromolecule catabolic process,BP,cell_exon_vs_cell_inex_goseq
GO:1902532,0.00071693394900292,0.999746030231997,17,349,negative regulation of intracellular signal transduction,BP,cell_exon_vs_cell_inex_goseq
GO:0030667,0.000717141131776344,0.999799420548629,12,215,secretory granule membrane,CC,cell_exon_vs_cell_inex_goseq
GO:0061013,0.00072611364544031,0.999841461150382,9,134,regulation of mRNA catabolic process,BP,cell_exon_vs_cell_inex_goseq
GO:0098796,0.000729388818251134,0.999663013072076,29,700,membrane protein complex,CC,cell_exon_vs_cell_inex_goseq
GO:0071364,0.000730005360344162,0.999924918012765,5,36,cellular response to epidermal growth factor stimulus,BP,cell_exon_vs_cell_inex_goseq
GO:0072332,0.000732021030504851,0.999880321394708,7,59,intrinsic apoptotic signaling pathway by p53 class mediator,BP,cell_exon_vs_cell_inex_goseq
GO:0009628,0.000736450214399141,0.999664109076736,28,724,response to abiotic stimulus,BP,cell_exon_vs_cell_inex_goseq
GO:0034121,0.000760045608200791,0.999896793671754,6,49,regulation of toll-like receptor signaling pathway,BP,cell_exon_vs_cell_inex_goseq
GO:0031099,0.000768439308769106,0.999831720928313,9,116,regeneration,BP,cell_exon_vs_cell_inex_goseq
GO:0051345,0.000775202286546654,0.999722953409185,17,386,positive regulation of hydrolase activity,BP,cell_exon_vs_cell_inex_goseq
GO:0002455,0.000775889584256145,0.999923978144893,5,22,humoral immune response mediated by circulating immunoglobulin,BP,cell_exon_vs_cell_inex_goseq
GO:0005884,0.00079127133701482,0.999888869375131,6,77,actin filament,CC,cell_exon_vs_cell_inex_goseq
GO:0061136,0.00079869938955314,0.999790128489599,11,152,regulation of proteasomal protein catabolic process,BP,cell_exon_vs_cell_inex_goseq
GO:0032271,0.000801849171072159,0.999804016749969,10,172,regulation of protein polymerization,BP,cell_exon_vs_cell_inex_goseq
GO:0001530,0.000806061929770782,0.999946467241424,4,16,lipopolysaccharide binding,MF,cell_exon_vs_cell_inex_goseq
GO:0005769,0.000815647651650448,0.999753465097825,13,290,early endosome,CC,cell_exon_vs_cell_inex_goseq
GO:2000113,0.000843659865504175,0.999577174669111,35,999,negative regulation of cellular macromolecule biosynthetic process,BP,cell_exon_vs_cell_inex_goseq
GO:1902255,0.000869171722730298,0.999986181988183,3,4,positive regulation of intrinsic apoptotic signaling pathway by p53 class mediator,BP,cell_exon_vs_cell_inex_goseq
GO:0032070,0.000870662754678284,0.99996937115292,3,10,regulation of deoxyribonuclease activity,BP,cell_exon_vs_cell_inex_goseq
GO:0036230,0.000875740540931589,0.999908659577097,5,28,granulocyte activation,BP,cell_exon_vs_cell_inex_goseq
GO:0043542,0.000885397932733797,0.999801265037905,9,132,endothelial cell migration,BP,cell_exon_vs_cell_inex_goseq
GO:0090322,0.000885608830269241,0.999935933888633,4,23,regulation of superoxide metabolic process,BP,cell_exon_vs_cell_inex_goseq
GO:0043523,0.000898133367378897,0.9997787466992,10,136,regulation of neuron apoptotic process,BP,cell_exon_vs_cell_inex_goseq
GO:0006401,0.000910186329444784,0.999722791609646,13,233,RNA catabolic process,BP,cell_exon_vs_cell_inex_goseq
GO:0035295,0.000920982739843026,0.999616533845859,22,565,tube development,BP,cell_exon_vs_cell_inex_goseq
GO:0001932,0.000929388877476543,0.999589256471864,25,671,regulation of protein phosphorylation,BP,cell_exon_vs_cell_inex_goseq
GO:0150146,0.000931994573524021,0.999936520639811,4,15,cell junction disassembly,BP,cell_exon_vs_cell_inex_goseq
GO:0010556,0.000945074899425286,0.999419836629383,73,2577,regulation of macromolecule biosynthetic process,BP,cell_exon_vs_cell_inex_goseq
GO:0002262,0.000946237399354934,0.999786287416062,9,120,myeloid cell homeostasis,BP,cell_exon_vs_cell_inex_goseq
GO:0050728,0.000946273598111786,0.999811613182209,8,80,negative regulation of inflammatory response,BP,cell_exon_vs_cell_inex_goseq
GO:0002819,0.000958420086490563,0.999783075048122,9,121,regulation of adaptive immune response,BP,cell_exon_vs_cell_inex_goseq
GO:0035194,0.000962378550372543,0.999831847838803,7,84,post-transcriptional gene silencing by RNA,BP,cell_exon_vs_cell_inex_goseq
GO:0097433,0.000965739328884506,0.999991741070357,2,4,dense body,CC,cell_exon_vs_cell_inex_goseq
GO:0062207,0.000981426428349778,0.999829225249284,7,72,regulation of pattern recognition receptor signaling pathway,BP,cell_exon_vs_cell_inex_goseq
GO:0034101,0.000983513588686118,0.999801060442184,8,99,erythrocyte homeostasis,BP,cell_exon_vs_cell_inex_goseq
GO:0045862,0.00098560002716734,0.999667133585259,15,274,positive regulation of proteolysis,BP,cell_exon_vs_cell_inex_goseq
GO:0009889,0.000987462233983661,0.999388088476272,76,2702,regulation of biosynthetic process,BP,cell_exon_vs_cell_inex_goseq
GO:0000979,0.000990981647533042,0.999928789601285,4,18,RNA polymerase II core promoter sequence-specific DNA binding,MF,cell_exon_vs_cell_inex_goseq
GO:0010632,0.000992958096764722,0.999772788158326,9,145,regulation of epithelial cell migration,BP,cell_exon_vs_cell_inex_goseq
GO:0048247,0.000993297359089552,0.999894434835917,5,26,lymphocyte chemotaxis,BP,cell_exon_vs_cell_inex_goseq
GO:0000470,0.000997452887122132,0.999893359489393,5,27,maturation of LSU-rRNA,BP,cell_exon_vs_cell_inex_goseq
GO:0032732,0.000998040966055259,0.999857569871919,6,47,positive regulation of interleukin-1 production,BP,cell_exon_vs_cell_inex_goseq
GO:0002695,0.00100804989937146,0.999770693384226,9,114,negative regulation of leukocyte activation,BP,cell_exon_vs_cell_inex_goseq
GO:0031327,0.00101610305387992,0.999480071798129,36,1043,negative regulation of cellular biosynthetic process,BP,cell_exon_vs_cell_inex_goseq
GO:0016441,0.00101659066216834,0.99982050426204,7,86,posttranscriptional gene silencing,BP,cell_exon_vs_cell_inex_goseq
GO:1902373,0.00101896775313203,0.999885216800735,5,44,negative regulation of mRNA catabolic process,BP,cell_exon_vs_cell_inex_goseq
GO:0043620,0.00102155024198781,0.99985379671444,6,46,regulation of DNA-templated transcription in response to stress,BP,cell_exon_vs_cell_inex_goseq
GO:0006956,0.00102861995052373,0.999892583249424,5,22,complement activation,BP,cell_exon_vs_cell_inex_goseq
GO:0033554,0.00102905941547293,0.999438736606776,44,1372,cellular response to stress,BP,cell_exon_vs_cell_inex_goseq
GO:0006826,0.00103096488575698,0.999886371809033,5,33,iron ion transport,BP,cell_exon_vs_cell_inex_goseq
GO:0070849,0.00104409987705618,0.99988282666945,5,39,response to epidermal growth factor,BP,cell_exon_vs_cell_inex_goseq
GO:0051702,0.0010461345387199,0.999818323320189,7,58,biological process involved in interaction with symbiont,BP,cell_exon_vs_cell_inex_goseq
GO:0019731,0.00104698014552452,0.999932795633134,4,11,antibacterial humoral response,BP,cell_exon_vs_cell_inex_goseq
GO:0000377,0.00105271860678808,0.999657723822978,14,247,"RNA splicing, via transesterification reactions with bulged adenosine as nucleophile",BP,cell_exon_vs_cell_inex_goseq
GO:0000398,0.00105271860678808,0.999657723822978,14,247,"mRNA splicing, via spliceosome",BP,cell_exon_vs_cell_inex_goseq
GO:0000165,0.00106404268165888,0.99957274730938,20,470,MAPK cascade,BP,cell_exon_vs_cell_inex_goseq
GO:0030224,0.00107480656904601,0.999917218962181,4,25,monocyte differentiation,BP,cell_exon_vs_cell_inex_goseq
GO:0006446,0.00108207822924599,0.999808795658009,7,70,regulation of translational initiation,BP,cell_exon_vs_cell_inex_goseq
GO:0050921,0.00108668612827288,0.999778508380951,8,83,positive regulation of chemotaxis,BP,cell_exon_vs_cell_inex_goseq
GO:0035976,0.00108694177683326,0.999981288006147,3,4,transcription factor AP-1 complex,CC,cell_exon_vs_cell_inex_goseq
GO:2000501,0.00109903709336224,0.99998100487727,3,4,regulation of natural killer cell chemotaxis,BP,cell_exon_vs_cell_inex_goseq
GO:0030027,0.00110491011593643,0.999769054729588,8,156,lamellipodium,CC,cell_exon_vs_cell_inex_goseq
GO:0043489,0.00111227008217345,0.999871454706299,5,48,RNA stabilization,BP,cell_exon_vs_cell_inex_goseq
GO:0033077,0.00111660067888808,0.999836860338643,6,48,T cell differentiation in thymus,BP,cell_exon_vs_cell_inex_goseq
GO:0097421,0.00111694638311758,0.999878761842434,5,25,liver regeneration,BP,cell_exon_vs_cell_inex_goseq
GO:0034135,0.00112997835660032,0.999956457486492,3,10,regulation of toll-like receptor 2 signaling pathway,BP,cell_exon_vs_cell_inex_goseq
GO:0032496,0.00113868891078166,0.999645816093927,13,200,response to lipopolysaccharide,BP,cell_exon_vs_cell_inex_goseq
GO:0097371,0.00115241440329705,0.999958712283381,3,8,MDM2/MDM4 family protein binding,MF,cell_exon_vs_cell_inex_goseq
GO:0030833,0.00117264447895847,0.999754325998674,8,122,regulation of actin filament polymerization,BP,cell_exon_vs_cell_inex_goseq
GO:0051336,0.00117489280517761,0.999481107258869,24,637,regulation of hydrolase activity,BP,cell_exon_vs_cell_inex_goseq
GO:0043487,0.00118441385284278,0.999722388326012,9,139,regulation of RNA stability,BP,cell_exon_vs_cell_inex_goseq
GO:0031100,0.00123833977803129,0.999815662668657,6,47,animal organ regeneration,BP,cell_exon_vs_cell_inex_goseq
GO:0002418,0.00124448665445235,0.999945651368128,3,15,immune response to tumor cell,BP,cell_exon_vs_cell_inex_goseq
GO:0002469,0.00125035746630583,1,2,2,myeloid dendritic cell antigen processing and presentation,BP,cell_exon_vs_cell_inex_goseq
GO:0002491,0.00125035746630583,1,2,2,antigen processing and presentation of endogenous peptide antigen via MHC class II,BP,cell_exon_vs_cell_inex_goseq
GO:0002833,0.00125117886795133,0.999736303488276,8,108,positive regulation of response to biotic stimulus,BP,cell_exon_vs_cell_inex_goseq
GO:0062197,0.00125150322676072,0.99960483889076,13,241,cellular response to chemical stress,BP,cell_exon_vs_cell_inex_goseq
GO:1903364,0.00127132570074836,0.999699906365848,9,126,positive regulation of cellular protein catabolic process,BP,cell_exon_vs_cell_inex_goseq
GO:0043410,0.00127219997214631,0.99957708950936,14,273,positive regulation of MAPK cascade,BP,cell_exon_vs_cell_inex_goseq
GO:0000375,0.00130143712720993,0.999567075747827,14,251,"RNA splicing, via transesterification reactions",BP,cell_exon_vs_cell_inex_goseq
GO:0045088,0.00130214571553151,0.999661560695571,10,155,regulation of innate immune response,BP,cell_exon_vs_cell_inex_goseq
GO:0032633,0.00133469502062826,0.999893384748404,4,21,interleukin-4 production,BP,cell_exon_vs_cell_inex_goseq
GO:0032673,0.00133469502062826,0.999893384748404,4,21,regulation of interleukin-4 production,BP,cell_exon_vs_cell_inex_goseq
GO:0032609,0.00136392093087662,0.99974949106032,7,68,interferon-gamma production,BP,cell_exon_vs_cell_inex_goseq
GO:0032649,0.00136392093087662,0.99974949106032,7,68,regulation of interferon-gamma production,BP,cell_exon_vs_cell_inex_goseq
GO:0006811,0.00137865520139156,0.999352614817593,27,745,ion transport,BP,cell_exon_vs_cell_inex_goseq
GO:0010494,0.0013801401522286,0.999830542610754,5,59,cytoplasmic stress granule,CC,cell_exon_vs_cell_inex_goseq
GO:0008285,0.00138627462288665,0.999446009907133,19,404,negative regulation of cell population proliferation,BP,cell_exon_vs_cell_inex_goseq
GO:1904093,0.00143994337990522,1,2,2,negative regulation of autophagic cell death,BP,cell_exon_vs_cell_inex_goseq
GO:0002532,0.00146000161514485,0.999773877414776,6,52,production of molecular mediator involved in inflammatory response,BP,cell_exon_vs_cell_inex_goseq
GO:1901575,0.00147410189203902,0.999175029514575,45,1453,organic substance catabolic process,BP,cell_exon_vs_cell_inex_goseq
GO:0009636,0.0014767156241046,0.999581594748032,11,146,response to toxic substance,BP,cell_exon_vs_cell_inex_goseq
GO:0001818,0.00147944865618144,0.999578850391899,11,169,negative regulation of cytokine production,BP,cell_exon_vs_cell_inex_goseq
GO:0045597,0.00148443212771877,0.999386390137485,20,502,positive regulation of cell differentiation,BP,cell_exon_vs_cell_inex_goseq
GO:0001891,0.00152949396412318,0.999872356993659,4,22,phagocytic cup,CC,cell_exon_vs_cell_inex_goseq
GO:0035278,0.00153555804310183,0.999927817256809,3,15,miRNA mediated inhibition of translation,BP,cell_exon_vs_cell_inex_goseq
GO:0040033,0.00153555804310183,0.999927817256809,3,15,"negative regulation of translation, ncRNA-mediated",BP,cell_exon_vs_cell_inex_goseq
GO:0045974,0.00153555804310183,0.999927817256809,3,15,"regulation of translation, ncRNA-mediated",BP,cell_exon_vs_cell_inex_goseq
GO:0045727,0.00153639577068322,0.999628679558575,9,113,positive regulation of translation,BP,cell_exon_vs_cell_inex_goseq
GO:0009056,0.00153852804958961,0.999099665616503,53,1790,catabolic process,BP,cell_exon_vs_cell_inex_goseq
GO:0071222,0.00154154981994894,0.999592635514404,10,128,cellular response to lipopolysaccharide,BP,cell_exon_vs_cell_inex_goseq
GO:0004888,0.00156283047394649,0.999404451293447,17,361,transmembrane signaling receptor activity,MF,cell_exon_vs_cell_inex_goseq
GO:0032997,0.00160638448173714,1,2,2,Fc receptor complex,CC,cell_exon_vs_cell_inex_goseq
GO:0032998,0.00160638448173714,1,2,2,Fc-epsilon receptor I complex,CC,cell_exon_vs_cell_inex_goseq
GO:0009057,0.00161023448589163,0.999160614884145,35,1026,macromolecule catabolic process,BP,cell_exon_vs_cell_inex_goseq
GO:0002221,0.00162555666061299,0.999602033048373,9,129,pattern recognition receptor signaling pathway,BP,cell_exon_vs_cell_inex_goseq
GO:0030490,0.00162573892651806,0.999745074495726,6,46,maturation of SSU-rRNA,BP,cell_exon_vs_cell_inex_goseq
GO:0071774,0.00164444805569423,0.999738302441839,6,55,response to fibroblast growth factor,BP,cell_exon_vs_cell_inex_goseq
GO:0031330,0.00165114939031881,0.999521683383036,11,194,negative regulation of cellular catabolic process,BP,cell_exon_vs_cell_inex_goseq
GO:0006402,0.00167408728197239,0.99951412927727,11,195,mRNA catabolic process,BP,cell_exon_vs_cell_inex_goseq
GO:0002822,0.00168300880440832,0.999628129370613,8,109,regulation of adaptive immune response based on somatic recombination of immune receptors built from immunoglobulin superfamily domains,BP,cell_exon_vs_cell_inex_goseq
GO:0002577,0.00169583913096017,0.99986873011588,4,13,regulation of antigen processing and presentation,BP,cell_exon_vs_cell_inex_goseq
GO:0061844,0.00170258455872626,0.999813583843463,5,16,antimicrobial humoral immune response mediated by antimicrobial peptide,BP,cell_exon_vs_cell_inex_goseq
GO:0002688,0.00170989082302605,0.999671997504481,7,73,regulation of leukocyte chemotaxis,BP,cell_exon_vs_cell_inex_goseq
GO:0002840,0.0017199034223199,0.999973708667484,2,7,regulation of T cell mediated immune response to tumor cell,BP,cell_exon_vs_cell_inex_goseq
GO:0050821,0.00172345001057526,0.999535047709443,10,152,protein stabilization,BP,cell_exon_vs_cell_inex_goseq
GO:0099080,0.00172559481296364,0.99920073165324,25,761,supramolecular complex,CC,cell_exon_vs_cell_inex_goseq
GO:0019220,0.00174401958701171,0.999143768409233,29,863,regulation of phosphate metabolic process,BP,cell_exon_vs_cell_inex_goseq
GO:0051174,0.00174401958701171,0.999143768409233,29,863,regulation of phosphorus metabolic process,BP,cell_exon_vs_cell_inex_goseq
GO:0051173,0.00175634399258743,0.998951774875542,56,1969,positive regulation of nitrogen compound metabolic process,BP,cell_exon_vs_cell_inex_goseq
GO:0051100,0.00176374097396717,0.999607635124391,8,107,negative regulation of binding,BP,cell_exon_vs_cell_inex_goseq
GO:0050777,0.00176466177128888,0.999562757486812,9,129,negative regulation of immune response,BP,cell_exon_vs_cell_inex_goseq
GO:0032613,0.00176880832913552,0.999778338618957,5,35,interleukin-10 production,BP,cell_exon_vs_cell_inex_goseq
GO:0032653,0.00176880832913552,0.999778338618957,5,35,regulation of interleukin-10 production,BP,cell_exon_vs_cell_inex_goseq
GO:0006690,0.00176961370981687,0.999714594241122,6,54,icosanoid metabolic process,BP,cell_exon_vs_cell_inex_goseq
GO:0038061,0.00177229693389675,0.999607991747436,8,91,NIK/NF-kappaB signaling,BP,cell_exon_vs_cell_inex_goseq
GO:1902905,0.00177501274721675,0.99955766167178,9,152,positive regulation of supramolecular fiber organization,BP,cell_exon_vs_cell_inex_goseq
GO:0045859,0.00180410506649891,0.999280924279529,18,417,regulation of protein kinase activity,BP,cell_exon_vs_cell_inex_goseq
GO:0016209,0.00181648948756349,0.999654243041006,7,54,antioxidant activity,MF,cell_exon_vs_cell_inex_goseq
GO:1990441,0.00183861868834817,0.999978168949016,2,4,negative regulation of transcription from RNA polymerase II promoter in response to endoplasmic reticulum stress,BP,cell_exon_vs_cell_inex_goseq
GO:0008092,0.00183968739049588,0.99920553165872,21,665,cytoskeletal protein binding,MF,cell_exon_vs_cell_inex_goseq
GO:2000112,0.00184751337727232,0.998839201184707,71,2555,regulation of cellular macromolecule biosynthetic process,BP,cell_exon_vs_cell_inex_goseq
GO:0034155,0.00188365510598812,0.999973731770252,2,5,regulation of toll-like receptor 7 signaling pathway,BP,cell_exon_vs_cell_inex_goseq
GO:0045471,0.00189172138106305,0.999629611020681,7,77,response to ethanol,BP,cell_exon_vs_cell_inex_goseq
GO:0010035,0.00190392844221324,0.999261210055303,17,346,response to inorganic substance,BP,cell_exon_vs_cell_inex_goseq
GO:0035747,0.00190975875055141,0.999930427113859,3,6,natural killer cell chemotaxis,BP,cell_exon_vs_cell_inex_goseq
GO:0001046,0.00191290690054656,0.999753643530951,5,39,core promoter sequence-specific DNA binding,MF,cell_exon_vs_cell_inex_goseq
GO:1990868,0.00191659296371983,0.999695396791578,6,37,response to chemokine,BP,cell_exon_vs_cell_inex_goseq
GO:1990869,0.00191659296371983,0.999695396791578,6,37,cellular response to chemokine,BP,cell_exon_vs_cell_inex_goseq
GO:0005681,0.0019215600048673,0.999434326167749,11,171,spliceosomal complex,CC,cell_exon_vs_cell_inex_goseq
GO:0002720,0.00192660151830885,0.999748443086772,5,46,positive regulation of cytokine production involved in immune response,BP,cell_exon_vs_cell_inex_goseq
GO:0008064,0.00194121985543444,0.999558368827087,8,133,regulation of actin polymerization or depolymerization,BP,cell_exon_vs_cell_inex_goseq
GO:2000401,0.00194467612610063,0.999749138437885,5,38,regulation of lymphocyte migration,BP,cell_exon_vs_cell_inex_goseq
GO:0010634,0.00195203919816856,0.999611619717179,7,99,positive regulation of epithelial cell migration,BP,cell_exon_vs_cell_inex_goseq
GO:0030832,0.00195823045426743,0.999553781042722,8,134,regulation of actin filament length,BP,cell_exon_vs_cell_inex_goseq
GO:2000060,0.00196342851133789,0.999610912533277,7,87,positive regulation of ubiquitin-dependent protein catabolic process,BP,cell_exon_vs_cell_inex_goseq
GO:2000566,0.00196568378399047,0.999982870121148,2,3,"positive regulation of CD8-positive, alpha-beta T cell proliferation",BP,cell_exon_vs_cell_inex_goseq
GO:0007010,0.00198431248360887,0.999041673602579,27,934,cytoskeleton organization,BP,cell_exon_vs_cell_inex_goseq
GO:0001895,0.00199394916590629,0.999815304373872,4,29,retina homeostasis,BP,cell_exon_vs_cell_inex_goseq
GO:0009895,0.00203482498833965,0.999355458864586,12,231,negative regulation of catabolic process,BP,cell_exon_vs_cell_inex_goseq
GO:0071675,0.00206611474959751,0.999590467941749,7,72,regulation of mononuclear cell migration,BP,cell_exon_vs_cell_inex_goseq
GO:1902369,0.00206682496910842,0.999722522740803,5,56,negative regulation of RNA catabolic process,BP,cell_exon_vs_cell_inex_goseq
GO:0002831,0.00208011285849998,0.999339479955309,12,229,regulation of response to biotic stimulus,BP,cell_exon_vs_cell_inex_goseq
GO:0034163,0.00211477704889878,0.999964079592255,2,7,regulation of toll-like receptor 9 signaling pathway,BP,cell_exon_vs_cell_inex_goseq
GO:0043030,0.00213599861952948,0.999721215567499,5,34,regulation of macrophage activation,BP,cell_exon_vs_cell_inex_goseq
GO:0035914,0.00216981807052828,0.999715002923645,5,35,skeletal muscle cell differentiation,BP,cell_exon_vs_cell_inex_goseq
GO:0045807,0.00217339108201125,0.999627787009463,6,78,positive regulation of endocytosis,BP,cell_exon_vs_cell_inex_goseq
GO:0006996,0.00219387639102105,0.998625859273829,67,2533,organelle organization,BP,cell_exon_vs_cell_inex_goseq
GO:0009991,0.00220243772845465,0.999189987714823,15,318,response to extracellular stimulus,BP,cell_exon_vs_cell_inex_goseq
GO:1901224,0.00221938627579322,0.999626940769912,6,51,positive regulation of NIK/NF-kappaB signaling,BP,cell_exon_vs_cell_inex_goseq
GO:1903052,0.00222960848831398,0.999484829631409,8,108,positive regulation of proteolysis involved in cellular protein catabolic process,BP,cell_exon_vs_cell_inex_goseq
GO:0070555,0.00228557448073791,0.999474705311723,8,86,response to interleukin-1,BP,cell_exon_vs_cell_inex_goseq
GO:2000737,0.0023061840379247,0.999873594189129,3,16,negative regulation of stem cell differentiation,BP,cell_exon_vs_cell_inex_goseq
GO:0042989,0.00231356605704675,0.999900495987901,3,7,sequestering of actin monomers,BP,cell_exon_vs_cell_inex_goseq
GO:0051129,0.00232634632372435,0.999049297847886,18,463,negative regulation of cellular component organization,BP,cell_exon_vs_cell_inex_goseq
GO:0044248,0.00233042762996768,0.998640454417377,48,1607,cellular catabolic process,BP,cell_exon_vs_cell_inex_goseq
GO:0048020,0.00233868340420971,0.999798103189219,4,14,CCR chemokine receptor binding,MF,cell_exon_vs_cell_inex_goseq
GO:0042554,0.00235650829402314,0.999774921434596,4,25,superoxide anion generation,BP,cell_exon_vs_cell_inex_goseq
GO:0002183,0.00237423957292046,0.999768494480585,4,30,cytoplasmic translational initiation,BP,cell_exon_vs_cell_inex_goseq
GO:0045953,0.00237700646668384,0.999873044309587,3,13,negative regulation of natural killer cell mediated cytotoxicity,BP,cell_exon_vs_cell_inex_goseq
GO:0032273,0.00238062385937636,0.999508539440706,7,104,positive regulation of protein polymerization,BP,cell_exon_vs_cell_inex_goseq
GO:0098869,0.00238913678409572,0.999518083488207,7,62,cellular oxidant detoxification,BP,cell_exon_vs_cell_inex_goseq
GO:0048878,0.00241287693621662,0.998892993328518,23,626,chemical homeostasis,BP,cell_exon_vs_cell_inex_goseq
GO:0010038,0.00243208108132638,0.999214330005971,12,211,response to metal ion,BP,cell_exon_vs_cell_inex_goseq
GO:0002716,0.00246693128598355,0.999864582270466,3,14,negative regulation of natural killer cell mediated immunity,BP,cell_exon_vs_cell_inex_goseq
GO:0031326,0.00247207311670047,0.998418828294005,73,2659,regulation of cellular biosynthetic process,BP,cell_exon_vs_cell_inex_goseq
GO:0000462,0.00248994175305567,0.999664253314314,5,33,"maturation of SSU-rRNA from tricistronic rRNA transcript (SSU-rRNA, 5.8S rRNA, LSU-rRNA)",BP,cell_exon_vs_cell_inex_goseq
GO:0071277,0.00255509433133086,0.999643471488017,5,47,cellular response to calcium ion,BP,cell_exon_vs_cell_inex_goseq
GO:0034063,0.00256293679793854,0.999848188545569,3,22,stress granule assembly,BP,cell_exon_vs_cell_inex_goseq
GO:0009611,0.00257114727818045,0.999038825231836,15,319,response to wounding,BP,cell_exon_vs_cell_inex_goseq
GO:0030029,0.0027008118673964,0.998910118451193,17,511,actin filament-based process,BP,cell_exon_vs_cell_inex_goseq
GO:0007519,0.00272990322215454,0.999427777780652,7,82,skeletal muscle tissue development,BP,cell_exon_vs_cell_inex_goseq
GO:0051347,0.0027334507709313,0.998969901950996,15,352,positive regulation of transferase activity,BP,cell_exon_vs_cell_inex_goseq
GO:0002361,0.00273533441199327,0.99997174572182,2,3,"CD4-positive, CD25-positive, alpha-beta regulatory T cell differentiation",BP,cell_exon_vs_cell_inex_goseq
GO:0032829,0.00273533441199327,0.99997174572182,2,3,"regulation of CD4-positive, CD25-positive, alpha-beta regulatory T cell differentiation",BP,cell_exon_vs_cell_inex_goseq
GO:0032831,0.00273533441199327,0.99997174572182,2,3,"positive regulation of CD4-positive, CD25-positive, alpha-beta regulatory T cell differentiation",BP,cell_exon_vs_cell_inex_goseq
GO:0016310,0.00275212907234364,0.99852775607862,34,1179,phosphorylation,BP,cell_exon_vs_cell_inex_goseq
GO:0000054,0.00276674240303553,0.999846681309057,3,12,ribosomal subunit export from nucleus,BP,cell_exon_vs_cell_inex_goseq
GO:0033750,0.00276674240303553,0.999846681309057,3,12,ribosome localization,BP,cell_exon_vs_cell_inex_goseq
GO:0030036,0.00279840174965934,0.998902028552003,16,470,actin cytoskeleton organization,BP,cell_exon_vs_cell_inex_goseq
GO:0008009,0.0028180570497999,0.999754517063394,4,12,chemokine activity,MF,cell_exon_vs_cell_inex_goseq
GO:0060266,0.00282919750742099,0.999970262995814,2,3,negative regulation of respiratory burst involved in inflammatory response,BP,cell_exon_vs_cell_inex_goseq
GO:0060268,0.00282919750742099,0.999970262995814,2,3,negative regulation of respiratory burst,BP,cell_exon_vs_cell_inex_goseq
GO:0002685,0.00284921174812871,0.999243270087165,9,123,regulation of leukocyte migration,BP,cell_exon_vs_cell_inex_goseq
GO:1902253,0.0028892330070021,0.99971433158311,4,21,regulation of intrinsic apoptotic signaling pathway by p53 class mediator,BP,cell_exon_vs_cell_inex_goseq
GO:0019221,0.00289408261722303,0.998907881356301,15,269,cytokine-mediated signaling pathway,BP,cell_exon_vs_cell_inex_goseq
GO:0002679,0.00290353164469914,0.999843815159004,3,10,respiratory burst involved in defense response,BP,cell_exon_vs_cell_inex_goseq
GO:0000288,0.00291824381967174,0.99957844567434,5,50,"nuclear-transcribed mRNA catabolic process, deadenylation-dependent decay",BP,cell_exon_vs_cell_inex_goseq
GO:0031331,0.00292833362101535,0.998888811035336,15,343,positive regulation of cellular catabolic process,BP,cell_exon_vs_cell_inex_goseq
GO:0060538,0.00293731963403855,0.999374576562901,7,87,skeletal muscle organ development,BP,cell_exon_vs_cell_inex_goseq
GO:2001234,0.00299457686559855,0.999128094205998,10,153,negative regulation of apoptotic signaling pathway,BP,cell_exon_vs_cell_inex_goseq
GO:0090304,0.00300207760227275,0.99799354678326,92,3424,nucleic acid metabolic process,BP,cell_exon_vs_cell_inex_goseq
GO:0031252,0.00307021186817398,0.999028300505601,11,311,cell leading edge,CC,cell_exon_vs_cell_inex_goseq
GO:0071428,0.00307211879436671,0.999820254779835,3,13,rRNA-containing ribonucleoprotein complex export from nucleus,BP,cell_exon_vs_cell_inex_goseq
GO:0042119,0.0030951846593635,0.99968257605236,4,24,neutrophil activation,BP,cell_exon_vs_cell_inex_goseq
GO:0034250,0.00310552206191634,0.999162750413344,9,131,positive regulation of cellular amide metabolic process,BP,cell_exon_vs_cell_inex_goseq
GO:0032588,0.00310917168183143,0.999428495251899,6,76,trans-Golgi network membrane,CC,cell_exon_vs_cell_inex_goseq
GO:1990932,0.00315595552068135,1,2,2,5.8S rRNA binding,MF,cell_exon_vs_cell_inex_goseq
GO:0005602,0.00315918016037416,1,2,2,complement component C1 complex,CC,cell_exon_vs_cell_inex_goseq
GO:0051649,0.00325222686886224,0.99814328408334,41,1477,establishment of localization in cell,BP,cell_exon_vs_cell_inex_goseq
GO:0072091,0.00325445876490765,0.999802857934254,3,14,regulation of stem cell proliferation,BP,cell_exon_vs_cell_inex_goseq
GO:0099186,0.0032902190647283,0.999933613245174,2,6,structural constituent of postsynapse,MF,cell_exon_vs_cell_inex_goseq
GO:0060213,0.00329996423227336,0.999801931614827,3,13,positive regulation of nuclear-transcribed mRNA poly(A) tail shortening,BP,cell_exon_vs_cell_inex_goseq
GO:0030218,0.00331140190195029,0.999277623620955,7,93,erythrocyte differentiation,BP,cell_exon_vs_cell_inex_goseq
GO:0051924,0.00333694224659423,0.999171634892057,8,131,regulation of calcium ion transport,BP,cell_exon_vs_cell_inex_goseq
GO:0002285,0.00333933099418528,0.999171691380959,8,127,lymphocyte activation involved in immune response,BP,cell_exon_vs_cell_inex_goseq
GO:1902904,0.00337134890003981,0.999257041838424,7,114,negative regulation of supramolecular fiber organization,BP,cell_exon_vs_cell_inex_goseq
GO:0034655,0.00337296653103462,0.998702000375459,15,321,nucleobase-containing compound catabolic process,BP,cell_exon_vs_cell_inex_goseq
GO:0031334,0.00339044413588545,0.999066601278689,9,175,positive regulation of protein-containing complex assembly,BP,cell_exon_vs_cell_inex_goseq
GO:0110053,0.00339489625597096,0.999063628345613,9,189,regulation of actin filament organization,BP,cell_exon_vs_cell_inex_goseq
GO:0097201,0.00344246900630734,0.999793764554761,3,12,negative regulation of transcription from RNA polymerase II promoter in response to stress,BP,cell_exon_vs_cell_inex_goseq
GO:0022603,0.00344301737170055,0.998500309691189,19,560,regulation of anatomical structure morphogenesis,BP,cell_exon_vs_cell_inex_goseq
GO:0008097,0.00344404472506063,0.999809559405982,3,9,5S rRNA binding,MF,cell_exon_vs_cell_inex_goseq
GO:0031901,0.00348511386582161,0.999224177646031,7,132,early endosome membrane,CC,cell_exon_vs_cell_inex_goseq
GO:0045824,0.00348704810151826,0.999473736809419,5,52,negative regulation of innate immune response,BP,cell_exon_vs_cell_inex_goseq
GO:0090066,0.00353862778124987,0.9987350722683,13,316,regulation of anatomical structure size,BP,cell_exon_vs_cell_inex_goseq
GO:0050829,0.00362160541983074,0.999481140622465,5,26,defense response to Gram-negative bacterium,BP,cell_exon_vs_cell_inex_goseq
GO:0038023,0.00368410193520549,0.998387833273951,19,485,signaling receptor activity,MF,cell_exon_vs_cell_inex_goseq
GO:0060089,0.00368410193520549,0.998387833273951,19,485,molecular transducer activity,MF,cell_exon_vs_cell_inex_goseq
GO:0050808,0.00373956075188859,0.998865600363476,10,238,synapse organization,BP,cell_exon_vs_cell_inex_goseq
GO:0038066,0.00375434415343883,0.999432354710029,5,41,p38MAPK cascade,BP,cell_exon_vs_cell_inex_goseq
GO:1903573,0.00377964101290467,0.999429818097802,5,39,negative regulation of response to endoplasmic reticulum stress,BP,cell_exon_vs_cell_inex_goseq
GO:0010911,0.00378066782248666,0.999913529464275,2,7,regulation of isomerase activity,BP,cell_exon_vs_cell_inex_goseq
GO:0010912,0.00378066782248666,0.999913529464275,2,7,positive regulation of isomerase activity,BP,cell_exon_vs_cell_inex_goseq
GO:0071456,0.00379270999503468,0.999153085071259,7,90,cellular response to hypoxia,BP,cell_exon_vs_cell_inex_goseq
GO:0001667,0.00380925136732733,0.998763768299636,11,253,ameboidal-type cell migration,BP,cell_exon_vs_cell_inex_goseq
GO:0045730,0.00381543821375905,0.99958720361182,4,23,respiratory burst,BP,cell_exon_vs_cell_inex_goseq
GO:0008043,0.0038253928124496,1,2,2,intracellular ferritin complex,CC,cell_exon_vs_cell_inex_goseq
GO:0070288,0.0038253928124496,1,2,2,ferritin complex,CC,cell_exon_vs_cell_inex_goseq
GO:0043280,0.00383429223880713,0.999140675711182,7,94,positive regulation of cysteine-type endopeptidase activity involved in apoptotic process,BP,cell_exon_vs_cell_inex_goseq
GO:0034134,0.0038795456966613,0.999746753748931,3,15,toll-like receptor 2 signaling pathway,BP,cell_exon_vs_cell_inex_goseq
GO:0043534,0.00393442170690712,0.999240971584978,6,77,blood vessel endothelial cell migration,BP,cell_exon_vs_cell_inex_goseq
GO:0098974,0.00394810005149052,0.999904112626662,2,8,postsynaptic actin cytoskeleton organization,BP,cell_exon_vs_cell_inex_goseq
GO:1901623,0.00394841126419412,0.999747293149633,3,13,regulation of lymphocyte chemotaxis,BP,cell_exon_vs_cell_inex_goseq
GO:0060211,0.00395444851444374,0.99974009019982,3,15,regulation of nuclear-transcribed mRNA poly(A) tail shortening,BP,cell_exon_vs_cell_inex_goseq
GO:0008187,0.00398656628376013,0.999723721013901,3,22,poly-pyrimidine tract binding,MF,cell_exon_vs_cell_inex_goseq
GO:0032072,0.00405153225781637,1,1,1,regulation of restriction endodeoxyribonuclease activity,BP,cell_exon_vs_cell_inex_goseq
GO:0071347,0.00405884064874952,0.999094815337173,7,67,cellular response to interleukin-1,BP,cell_exon_vs_cell_inex_goseq
GO:0045934,0.00409241138659864,0.997796272041937,32,973,negative regulation of nucleobase-containing compound metabolic process,BP,cell_exon_vs_cell_inex_goseq
GO:0033673,0.00410230147039739,0.998747797466959,10,171,negative regulation of kinase activity,BP,cell_exon_vs_cell_inex_goseq
GO:0006816,0.00411276630950432,0.998737865610472,10,215,calcium ion transport,BP,cell_exon_vs_cell_inex_goseq
GO:0019207,0.00414120779290922,0.998734410205798,10,170,kinase regulator activity,MF,cell_exon_vs_cell_inex_goseq
GO:0007166,0.00418198209843858,0.99756145420495,42,1477,cell surface receptor signaling pathway,BP,cell_exon_vs_cell_inex_goseq
GO:0034599,0.00419890192678013,0.998625336504543,11,204,cellular response to oxidative stress,BP,cell_exon_vs_cell_inex_goseq
GO:0043555,0.00426206035083217,0.999700593582246,3,20,regulation of translation in response to stress,BP,cell_exon_vs_cell_inex_goseq
GO:0070412,0.00426319883683092,0.999702297976561,3,19,R-SMAD binding,MF,cell_exon_vs_cell_inex_goseq
GO:1990748,0.00428906486837088,0.999031499393957,7,70,cellular detoxification,BP,cell_exon_vs_cell_inex_goseq
GO:0008656,0.00429604175349736,0.999712565211837,3,14,cysteine-type endopeptidase activator activity involved in apoptotic process,MF,cell_exon_vs_cell_inex_goseq
GO:2001198,0.0043309784511513,0.999731063768775,3,10,regulation of dendritic cell differentiation,BP,cell_exon_vs_cell_inex_goseq
GO:0097100,0.00434695185955574,0.999906875323134,2,5,supercoiled DNA binding,MF,cell_exon_vs_cell_inex_goseq
GO:0002888,0.00441714556217211,0.999694825048353,3,16,positive regulation of myeloid leukocyte mediated immunity,BP,cell_exon_vs_cell_inex_goseq
GO:0001911,0.00442820622170787,0.999688669666138,3,18,negative regulation of leukocyte mediated cytotoxicity,BP,cell_exon_vs_cell_inex_goseq
GO:1904062,0.00443753490080645,0.998727862774861,9,172,regulation of cation transmembrane transport,BP,cell_exon_vs_cell_inex_goseq
GO:0042759,0.00443862836307973,0.999703715983883,3,13,long-chain fatty acid biosynthetic process,BP,cell_exon_vs_cell_inex_goseq
GO:0002582,0.00444550147144698,1,2,2,positive regulation of antigen processing and presentation of peptide or polysaccharide antigen via MHC class II,BP,cell_exon_vs_cell_inex_goseq
GO:0002585,0.00444550147144698,1,2,2,positive regulation of antigen processing and presentation of peptide antigen,BP,cell_exon_vs_cell_inex_goseq
GO:0002588,0.00444550147144698,1,2,2,positive regulation of antigen processing and presentation of peptide antigen via MHC class II,BP,cell_exon_vs_cell_inex_goseq
GO:0048524,0.00445714248922744,0.999285226971663,5,55,positive regulation of viral process,BP,cell_exon_vs_cell_inex_goseq
GO:0016192,0.00449405558707292,0.99761052568768,30,1073,vesicle-mediated transport,BP,cell_exon_vs_cell_inex_goseq
GO:0005854,0.00449627102314319,0.999939917918718,2,3,nascent polypeptide-associated complex,CC,cell_exon_vs_cell_inex_goseq
GO:0046700,0.00450000153505153,0.998211801867341,15,340,heterocycle catabolic process,BP,cell_exon_vs_cell_inex_goseq
GO:0048245,0.00460707304995061,0.999729410379666,3,8,eosinophil chemotaxis,BP,cell_exon_vs_cell_inex_goseq
GO:2000403,0.00460769418494186,0.999471487524029,4,24,positive regulation of lymphocyte migration,BP,cell_exon_vs_cell_inex_goseq
GO:0071353,0.0046211422082572,0.999475206359339,4,22,cellular response to interleukin-4,BP,cell_exon_vs_cell_inex_goseq
GO:0097028,0.00467730517636574,0.99944874224915,4,30,dendritic cell differentiation,BP,cell_exon_vs_cell_inex_goseq
GO:0042609,0.00468489665499986,0.999875742675124,2,8,CD4 receptor binding,MF,cell_exon_vs_cell_inex_goseq
GO:0010594,0.00471917066619948,0.998896865104373,7,106,regulation of endothelial cell migration,BP,cell_exon_vs_cell_inex_goseq
GO:1901800,0.00472339741336641,0.998900262362085,7,94,positive regulation of proteasomal protein catabolic process,BP,cell_exon_vs_cell_inex_goseq
GO:0150111,0.00473851222890521,0.999934926618803,2,3,regulation of transepithelial transport,BP,cell_exon_vs_cell_inex_goseq
GO:0030136,0.00473989826729867,0.998752788152948,8,132,clathrin-coated vesicle,CC,cell_exon_vs_cell_inex_goseq
GO:0036294,0.00475201985727041,0.998890706549856,7,98,cellular response to decreased oxygen levels,BP,cell_exon_vs_cell_inex_goseq
GO:0070670,0.00484579925356853,0.999439060483541,4,23,response to interleukin-4,BP,cell_exon_vs_cell_inex_goseq
GO:0032436,0.00484887291660807,0.999025222476914,6,74,positive regulation of proteasomal ubiquitin-dependent protein catabolic process,BP,cell_exon_vs_cell_inex_goseq
GO:0006139,0.00485885154826823,0.996661451803257,98,3742,nucleobase-containing compound metabolic process,BP,cell_exon_vs_cell_inex_goseq
GO:0032535,0.00502130239147904,0.998308234441665,11,263,regulation of cellular component size,BP,cell_exon_vs_cell_inex_goseq
GO:0045766,0.00502404441232843,0.998817365732987,7,93,positive regulation of angiogenesis,BP,cell_exon_vs_cell_inex_goseq
GO:1904018,0.00502404441232843,0.998817365732987,7,93,positive regulation of vasculature development,BP,cell_exon_vs_cell_inex_goseq
GO:0002283,0.00503392190025814,0.99964341254493,3,14,neutrophil activation involved in immune response,BP,cell_exon_vs_cell_inex_goseq
GO:0097237,0.00506033300607257,0.998818722671808,7,74,cellular response to toxic substance,BP,cell_exon_vs_cell_inex_goseq
GO:0002861,0.00507960055129651,0.99939564352372,4,26,regulation of inflammatory response to antigenic stimulus,BP,cell_exon_vs_cell_inex_goseq
GO:0019439,0.00508500572736806,0.997951552549938,15,346,aromatic compound catabolic process,BP,cell_exon_vs_cell_inex_goseq
GO:0019809,0.0050885037655037,1,2,2,spermidine binding,MF,cell_exon_vs_cell_inex_goseq
GO:0032917,0.0050885037655037,1,2,2,polyamine acetylation,BP,cell_exon_vs_cell_inex_goseq
GO:0032918,0.0050885037655037,1,2,2,spermidine acetylation,BP,cell_exon_vs_cell_inex_goseq
GO:0098918,0.00512982453149576,0.999847641099761,2,11,structural constituent of synapse,MF,cell_exon_vs_cell_inex_goseq
GO:0051259,0.00514406144194718,0.998495445977857,9,154,protein complex oligomerization,BP,cell_exon_vs_cell_inex_goseq
GO:0050922,0.00518804640757572,0.999362387394252,4,35,negative regulation of chemotaxis,BP,cell_exon_vs_cell_inex_goseq
GO:0030316,0.00524202496078962,0.998935466587915,6,65,osteoclast differentiation,BP,cell_exon_vs_cell_inex_goseq
GO:1902175,0.00524851844042119,0.999369712812801,4,26,regulation of oxidative stress-induced intrinsic apoptotic signaling pathway,BP,cell_exon_vs_cell_inex_goseq
GO:0002536,0.00526614868174929,0.999892480535926,2,4,respiratory burst involved in inflammatory response,BP,cell_exon_vs_cell_inex_goseq
GO:0060264,0.00526614868174929,0.999892480535926,2,4,regulation of respiratory burst involved in inflammatory response,BP,cell_exon_vs_cell_inex_goseq
GO:0071605,0.00529948843920926,0.999622885003716,3,13,monocyte chemotactic protein-1 production,BP,cell_exon_vs_cell_inex_goseq
GO:0071637,0.00529948843920926,0.999622885003716,3,13,regulation of monocyte chemotactic protein-1 production,BP,cell_exon_vs_cell_inex_goseq
GO:0098562,0.00530786790264054,0.998723425005436,7,135,cytoplasmic side of membrane,CC,cell_exon_vs_cell_inex_goseq
GO:0043202,0.00534022515233548,0.999108852857229,5,52,lysosomal lumen,CC,cell_exon_vs_cell_inex_goseq
GO:0047066,0.00536053158421988,1,2,2,phospholipid-hydroperoxide glutathione peroxidase activity,MF,cell_exon_vs_cell_inex_goseq
GO:2001235,0.00537770903882598,0.998719149176469,7,91,positive regulation of apoptotic signaling pathway,BP,cell_exon_vs_cell_inex_goseq
GO:0046836,0.00538564307431302,0.999852172989673,2,7,glycolipid transport,BP,cell_exon_vs_cell_inex_goseq
GO:1904580,0.00542871752841506,0.999919965391943,2,3,regulation of intracellular mRNA localization,BP,cell_exon_vs_cell_inex_goseq
GO:1904582,0.00542871752841506,0.999919965391943,2,3,positive regulation of intracellular mRNA localization,BP,cell_exon_vs_cell_inex_goseq
GO:0071544,0.0054481792044614,1,1,1,diphosphoinositol polyphosphate catabolic process,BP,cell_exon_vs_cell_inex_goseq
GO:0050801,0.00545668913386705,0.997709712459612,16,404,ion homeostasis,BP,cell_exon_vs_cell_inex_goseq
GO:0016071,0.0055077807430626,0.997389052517251,21,560,mRNA metabolic process,BP,cell_exon_vs_cell_inex_goseq
GO:0002507,0.00551397811971043,0.999580503793158,3,18,tolerance induction,BP,cell_exon_vs_cell_inex_goseq
GO:2001244,0.00556914918257205,0.99906949437506,5,45,positive regulation of intrinsic apoptotic signaling pathway,BP,cell_exon_vs_cell_inex_goseq
GO:2000648,0.00557933436320935,0.99983805494967,2,8,positive regulation of stem cell proliferation,BP,cell_exon_vs_cell_inex_goseq
GO:0044270,0.0055819298856273,0.997728209725058,15,345,cellular nitrogen compound catabolic process,BP,cell_exon_vs_cell_inex_goseq
GO:0034143,0.00560057604932074,0.999578514644462,3,16,regulation of toll-like receptor 4 signaling pathway,BP,cell_exon_vs_cell_inex_goseq
GO:0033674,0.00563222811135463,0.997967621226629,12,289,positive regulation of kinase activity,BP,cell_exon_vs_cell_inex_goseq
GO:0005771,0.00565667298190294,0.999284675841098,4,37,multivesicular body,CC,cell_exon_vs_cell_inex_goseq
GO:0030168,0.00566298102627986,0.998823088274438,6,76,platelet activation,BP,cell_exon_vs_cell_inex_goseq
GO:0004464,0.00574022767202697,0.999857986939464,2,5,leukotriene-C4 synthase activity,MF,cell_exon_vs_cell_inex_goseq
GO:0034239,0.00576126062744654,0.999912380077627,2,3,regulation of macrophage fusion,BP,cell_exon_vs_cell_inex_goseq
GO:0034241,0.00576126062744654,0.999912380077627,2,3,positive regulation of macrophage fusion,BP,cell_exon_vs_cell_inex_goseq
GO:0008199,0.00582362089827495,0.999910931134141,2,3,ferric iron binding,MF,cell_exon_vs_cell_inex_goseq
GO:0016505,0.00582453273614504,0.999551477863272,3,17,peptidase activator activity involved in apoptotic process,MF,cell_exon_vs_cell_inex_goseq
GO:0052547,0.00584937549457382,0.997787681954499,13,253,regulation of peptidase activity,BP,cell_exon_vs_cell_inex_goseq
GO:0002834,0.00598489534100926,0.999804845194053,2,12,regulation of response to tumor cell,BP,cell_exon_vs_cell_inex_goseq
GO:0002837,0.00598489534100926,0.999804845194053,2,12,regulation of immune response to tumor cell,BP,cell_exon_vs_cell_inex_goseq
GO:0005581,0.00598862997194843,0.999517539779831,3,23,collagen trimer,CC,cell_exon_vs_cell_inex_goseq
GO:0051851,0.00600847510086581,0.998974854334721,5,47,modulation by host of symbiont process,BP,cell_exon_vs_cell_inex_goseq
GO:0140297,0.00602237115675979,0.99770761311334,13,299,DNA-binding transcription factor binding,MF,cell_exon_vs_cell_inex_goseq
GO:0051493,0.0060281508051988,0.997606602919989,14,374,regulation of cytoskeleton organization,BP,cell_exon_vs_cell_inex_goseq
GO:1904044,0.00604996004550858,0.999867228047517,2,4,response to aldosterone,BP,cell_exon_vs_cell_inex_goseq
GO:0030133,0.00605572228655241,0.99790681917758,11,268,transport vesicle,CC,cell_exon_vs_cell_inex_goseq
GO:0002428,0.00606045946067659,0.999905353120668,2,3,antigen processing and presentation of peptide antigen via MHC class Ib,BP,cell_exon_vs_cell_inex_goseq
GO:0002477,0.00606045946067659,0.999905353120668,2,3,antigen processing and presentation of exogenous peptide antigen via MHC class Ib,BP,cell_exon_vs_cell_inex_goseq
GO:0051403,0.006097218541732,0.998164682358735,9,170,stress-activated MAPK cascade,BP,cell_exon_vs_cell_inex_goseq
GO:0043408,0.00610393583912626,0.997408042278169,16,395,regulation of MAPK cascade,BP,cell_exon_vs_cell_inex_goseq
GO:0030837,0.00610743205581609,0.999202014509984,4,44,negative regulation of actin filament polymerization,BP,cell_exon_vs_cell_inex_goseq
GO:0044344,0.00615447673165959,0.998938753112671,5,51,cellular response to fibroblast growth factor stimulus,BP,cell_exon_vs_cell_inex_goseq
GO:2001056,0.00617820764218412,0.998482514366889,7,105,positive regulation of cysteine-type endopeptidase activity,BP,cell_exon_vs_cell_inex_goseq
GO:0043922,0.00617960269400518,0.999552066264698,3,11,negative regulation by host of viral transcription,BP,cell_exon_vs_cell_inex_goseq
GO:0070098,0.00621904999284488,0.998968884023634,5,30,chemokine-mediated signaling pathway,BP,cell_exon_vs_cell_inex_goseq
GO:0032753,0.00622103631781223,0.999513665108726,3,16,positive regulation of interleukin-4 production,BP,cell_exon_vs_cell_inex_goseq
GO:0030867,0.0062258729408269,0.999225874851171,4,23,rough endoplasmic reticulum membrane,CC,cell_exon_vs_cell_inex_goseq
GO:1900426,0.00624741956188176,0.999860579552012,2,4,positive regulation of defense response to bacterium,BP,cell_exon_vs_cell_inex_goseq
GO:0006468,0.00626013406060682,0.996664351035699,28,974,protein phosphorylation,BP,cell_exon_vs_cell_inex_goseq
GO:1903201,0.00627242351392987,0.998912303737155,5,52,regulation of oxidative stress-induced cell death,BP,cell_exon_vs_cell_inex_goseq
GO:0051250,0.00628387228365323,0.998454696370422,7,99,negative regulation of lymphocyte activation,BP,cell_exon_vs_cell_inex_goseq
GO:0000381,0.00633179504308487,0.99916525735909,4,43,"regulation of alternative mRNA splicing, via spliceosome",BP,cell_exon_vs_cell_inex_goseq
GO:0051494,0.00634031905677272,0.998633298208272,6,112,negative regulation of cytoskeleton organization,BP,cell_exon_vs_cell_inex_goseq
GO:0009743,0.00635702578486596,0.998078494903489,9,154,response to carbohydrate,BP,cell_exon_vs_cell_inex_goseq
GO:0098662,0.00635899931498164,0.997370465309915,15,382,inorganic cation transmembrane transport,BP,cell_exon_vs_cell_inex_goseq
GO:2000435,0.00638529175705013,0.99989751231118,2,3,negative regulation of protein neddylation,BP,cell_exon_vs_cell_inex_goseq
GO:0042542,0.00642406808071594,0.99823178724336,8,108,response to hydrogen peroxide,BP,cell_exon_vs_cell_inex_goseq
GO:0006469,0.00642629688406223,0.998054579586888,9,153,negative regulation of protein kinase activity,BP,cell_exon_vs_cell_inex_goseq
GO:0043281,0.00642948848502569,0.998054779704892,9,149,regulation of cysteine-type endopeptidase activity involved in apoptotic process,BP,cell_exon_vs_cell_inex_goseq
GO:0040019,0.0064360690837185,0.999788714657059,2,10,positive regulation of embryonic development,BP,cell_exon_vs_cell_inex_goseq
GO:0006801,0.00645202497063611,0.999151402223249,4,38,superoxide metabolic process,BP,cell_exon_vs_cell_inex_goseq
GO:0015629,0.00646097579942922,0.997622457923294,12,332,actin cytoskeleton,CC,cell_exon_vs_cell_inex_goseq
GO:0032637,0.00647800363198238,0.998633346335964,6,58,interleukin-8 production,BP,cell_exon_vs_cell_inex_goseq
GO:0032677,0.00647800363198238,0.998633346335964,6,58,regulation of interleukin-8 production,BP,cell_exon_vs_cell_inex_goseq
GO:0031342,0.00647978694470402,0.999473834496038,3,19,negative regulation of cell killing,BP,cell_exon_vs_cell_inex_goseq
GO:0097283,0.00648907466106784,0.999852290564916,2,4,keratinocyte apoptotic process,BP,cell_exon_vs_cell_inex_goseq
GO:1902172,0.00648907466106784,0.999852290564916,2,4,regulation of keratinocyte apoptotic process,BP,cell_exon_vs_cell_inex_goseq
GO:2000146,0.00649693232866219,0.998023616675463,9,175,negative regulation of cell motility,BP,cell_exon_vs_cell_inex_goseq
GO:0035026,0.0064998721315199,1,1,1,leading edge cell differentiation,BP,cell_exon_vs_cell_inex_goseq
GO:0008289,0.00651327446781978,0.997208539846184,16,479,lipid binding,MF,cell_exon_vs_cell_inex_goseq
GO:0006880,0.00656534806563998,0.999893072878724,2,3,intracellular sequestering of iron ion,BP,cell_exon_vs_cell_inex_goseq
GO:0097577,0.00656534806563998,0.999893072878724,2,3,sequestering of iron ion,BP,cell_exon_vs_cell_inex_goseq
GO:0034137,0.00656587748244365,0.999800300021184,2,7,positive regulation of toll-like receptor 2 signaling pathway,BP,cell_exon_vs_cell_inex_goseq
GO:0043516,0.00656707252842056,0.999453000127201,3,23,"regulation of DNA damage response, signal transduction by p53 class mediator",BP,cell_exon_vs_cell_inex_goseq
GO:1901360,0.00661920588993886,0.995372718002637,102,3975,organic cyclic compound metabolic process,BP,cell_exon_vs_cell_inex_goseq
GO:0006706,0.00662440340937851,0.99947550748803,3,15,steroid catabolic process,BP,cell_exon_vs_cell_inex_goseq
GO:1904092,0.00662447523391728,0.999847573840833,2,4,regulation of autophagic cell death,BP,cell_exon_vs_cell_inex_goseq
GO:0060402,0.00662580829269882,0.998815782773338,5,76,calcium ion transport into cytosol,BP,cell_exon_vs_cell_inex_goseq
GO:0002886,0.00663718271684871,0.999117029249091,4,40,regulation of myeloid leukocyte mediated immunity,BP,cell_exon_vs_cell_inex_goseq
GO:0070891,0.00670543922213002,0.999889573485937,2,3,lipoteichoic acid binding,MF,cell_exon_vs_cell_inex_goseq
GO:0002704,0.00674062504645195,0.999103909869385,4,37,negative regulation of leukocyte mediated immunity,BP,cell_exon_vs_cell_inex_goseq
GO:1903978,0.00675322610733119,0.999483914820621,3,12,regulation of microglial cell activation,BP,cell_exon_vs_cell_inex_goseq
GO:0042590,0.00680948583088064,0.999799948374785,2,6,antigen processing and presentation of exogenous peptide antigen via MHC class I,BP,cell_exon_vs_cell_inex_goseq
GO:0019725,0.00687019567870374,0.996809271086679,19,499,cellular homeostasis,BP,cell_exon_vs_cell_inex_goseq
GO:0061158,0.00687652275943571,0.999462093258515,3,13,3'-UTR-mediated mRNA destabilization,BP,cell_exon_vs_cell_inex_goseq
GO:0042269,0.00692430403026186,0.999414630091221,3,22,regulation of natural killer cell mediated cytotoxicity,BP,cell_exon_vs_cell_inex_goseq
GO:0006397,0.00694942763326422,0.997007697847726,16,394,mRNA processing,BP,cell_exon_vs_cell_inex_goseq
GO:0031098,0.00697129859410858,0.997855239498203,9,177,stress-activated protein kinase signaling cascade,BP,cell_exon_vs_cell_inex_goseq
GO:0006725,0.00699212162655722,0.995116301244678,99,3844,cellular aromatic compound metabolic process,BP,cell_exon_vs_cell_inex_goseq
GO:0097452,0.00701606375707924,0.999833645180017,2,4,GAIT complex,CC,cell_exon_vs_cell_inex_goseq
GO:0033344,0.00701782838063383,0.999064140956397,4,33,cholesterol efflux,BP,cell_exon_vs_cell_inex_goseq
GO:0030098,0.00702717913570791,0.997398196843852,12,245,lymphocyte differentiation,BP,cell_exon_vs_cell_inex_goseq
GO:0002715,0.00705783797192322,0.999396559155439,3,23,regulation of natural killer cell mediated immunity,BP,cell_exon_vs_cell_inex_goseq
GO:0009896,0.00706639199405245,0.997042817369793,15,386,positive regulation of catabolic process,BP,cell_exon_vs_cell_inex_goseq
GO:0051241,0.00707231807803544,0.996571407666531,21,545,negative regulation of multicellular organismal process,BP,cell_exon_vs_cell_inex_goseq
GO:0005885,0.00709840844149565,0.999775181096343,2,7,Arp2/3 protein complex,CC,cell_exon_vs_cell_inex_goseq
GO:0051606,0.00710254679006788,0.998440904019403,6,93,detection of stimulus,BP,cell_exon_vs_cell_inex_goseq
GO:0042379,0.00710756294311885,0.99909268497902,4,21,chemokine receptor binding,MF,cell_exon_vs_cell_inex_goseq
GO:0070664,0.00711076800202573,0.998729188458016,5,52,negative regulation of leukocyte proliferation,BP,cell_exon_vs_cell_inex_goseq
GO:0042104,0.00712820707640671,0.999427130105902,3,14,positive regulation of activated T cell proliferation,BP,cell_exon_vs_cell_inex_goseq
GO:0004145,0.00720924138927438,0.999876666642592,2,3,diamine N-acetyltransferase activity,MF,cell_exon_vs_cell_inex_goseq
GO:0010803,0.00727319195879044,0.999017823337728,4,34,regulation of tumor necrosis factor-mediated signaling pathway,BP,cell_exon_vs_cell_inex_goseq
GO:0005794,0.00736877081376079,0.99593729571332,30,1075,Golgi apparatus,CC,cell_exon_vs_cell_inex_goseq
GO:0009314,0.00738660549980725,0.997115281346442,13,311,response to radiation,BP,cell_exon_vs_cell_inex_goseq
GO:0032873,0.00739663654542541,0.998990170760482,4,37,negative regulation of stress-activated MAPK cascade,BP,cell_exon_vs_cell_inex_goseq
GO:0070303,0.00739663654542541,0.998990170760482,4,37,negative regulation of stress-activated protein kinase signaling cascade,BP,cell_exon_vs_cell_inex_goseq
GO:0005789,0.00742822397357778,0.996089007951336,26,781,endoplasmic reticulum membrane,CC,cell_exon_vs_cell_inex_goseq
GO:0051260,0.00744233489127555,0.998105532433554,7,108,protein homooligomerization,BP,cell_exon_vs_cell_inex_goseq
GO:0032755,0.00746968800187137,0.998367759487262,6,64,positive regulation of interleukin-6 production,BP,cell_exon_vs_cell_inex_goseq
GO:0072359,0.00748843069043005,0.996413919621332,20,607,circulatory system development,BP,cell_exon_vs_cell_inex_goseq
GO:0002687,0.00752274327142928,0.998097329454069,7,85,positive regulation of leukocyte migration,BP,cell_exon_vs_cell_inex_goseq
GO:0051271,0.00753168412417283,0.99765362879667,9,180,negative regulation of cellular component movement,BP,cell_exon_vs_cell_inex_goseq
GO:0046034,0.00753361392818043,0.99720015425077,12,190,ATP metabolic process,BP,cell_exon_vs_cell_inex_goseq
GO:1903980,0.00758022488215482,0.999812843922936,2,4,positive regulation of microglial cell activation,BP,cell_exon_vs_cell_inex_goseq
GO:0061061,0.0076024170734122,0.99690332234039,14,333,muscle structure development,BP,cell_exon_vs_cell_inex_goseq
GO:0001772,0.0076032957128471,0.998953703690498,4,37,immunological synapse,CC,cell_exon_vs_cell_inex_goseq
GO:1904749,0.00761276079248166,0.999749957726794,2,7,regulation of protein localization to nucleolus,BP,cell_exon_vs_cell_inex_goseq
GO:0150062,0.00761555189062295,0.999811513109815,2,4,complement-mediated synapse pruning,BP,cell_exon_vs_cell_inex_goseq
GO:0099188,0.00761797964885361,0.999732841271104,2,9,postsynaptic cytoskeleton organization,BP,cell_exon_vs_cell_inex_goseq
GO:0060341,0.00763222472889687,0.996413373614972,19,578,regulation of cellular localization,BP,cell_exon_vs_cell_inex_goseq
GO:0008134,0.00765592973884254,0.996572960624371,17,450,transcription factor binding,MF,cell_exon_vs_cell_inex_goseq
GO:0098771,0.00767873692502485,0.996756515801583,15,384,inorganic ion homeostasis,BP,cell_exon_vs_cell_inex_goseq
GO:0006911,0.007803872560902,0.998907748546051,4,43,"phagocytosis, engulfment",BP,cell_exon_vs_cell_inex_goseq
GO:0045861,0.00794685610956699,0.997328911809975,10,176,negative regulation of proteolysis,BP,cell_exon_vs_cell_inex_goseq
GO:0002485,0.00795577679473639,1,1,1,"antigen processing and presentation of endogenous peptide antigen via MHC class I via ER pathway, TAP-dependent",BP,cell_exon_vs_cell_inex_goseq
GO:0052548,0.00800910226843715,0.996985475703676,12,237,regulation of endopeptidase activity,BP,cell_exon_vs_cell_inex_goseq
GO:0010875,0.00810670441331112,0.99928582830303,3,19,positive regulation of cholesterol efflux,BP,cell_exon_vs_cell_inex_goseq
GO:0045670,0.00813283013285479,0.9985183096326,5,42,regulation of osteoclast differentiation,BP,cell_exon_vs_cell_inex_goseq
GO:0098827,0.00813581195971166,0.995684383872992,26,785,endoplasmic reticulum subcompartment,CC,cell_exon_vs_cell_inex_goseq
GO:0043024,0.00815371837504093,0.999296556457451,3,16,ribosomal small subunit binding,MF,cell_exon_vs_cell_inex_goseq
GO:0098655,0.00816736460753534,0.99641606249239,16,442,cation transmembrane transport,BP,cell_exon_vs_cell_inex_goseq
GO:0042256,0.00817922915008093,0.999756646072879,2,5,mature ribosome assembly,BP,cell_exon_vs_cell_inex_goseq
GO:0031904,0.00819588394708556,0.999279933019538,3,18,endosome lumen,CC,cell_exon_vs_cell_inex_goseq
GO:0071453,0.00821688699241749,0.997868935730956,7,108,cellular response to oxygen levels,BP,cell_exon_vs_cell_inex_goseq
GO:0071677,0.00822538742830972,0.998492544646668,5,44,positive regulation of mononuclear cell migration,BP,cell_exon_vs_cell_inex_goseq
GO:0019808,0.00822652220107881,0.999849118181496,2,3,polyamine binding,MF,cell_exon_vs_cell_inex_goseq
GO:0032434,0.00828711589846159,0.997846058766111,7,110,regulation of proteasomal ubiquitin-dependent protein catabolic process,BP,cell_exon_vs_cell_inex_goseq
GO:0034238,0.00830359931287325,0.99978494524391,2,4,macrophage fusion,BP,cell_exon_vs_cell_inex_goseq
GO:0002475,0.00833167945825376,0.999749703538323,2,5,antigen processing and presentation via MHC class Ib,BP,cell_exon_vs_cell_inex_goseq
GO:0001776,0.00833327745423459,0.998437776437949,5,63,leukocyte homeostasis,BP,cell_exon_vs_cell_inex_goseq
GO:1904724,0.00833648471836995,0.998837687989893,4,31,tertiary granule lumen,CC,cell_exon_vs_cell_inex_goseq
GO:0030838,0.00835200486673487,0.998424834047892,5,72,positive regulation of actin filament polymerization,BP,cell_exon_vs_cell_inex_goseq
GO:0060907,0.0083644769822841,0.999685416014234,2,10,positive regulation of macrophage cytokine production,BP,cell_exon_vs_cell_inex_goseq
GO:0035198,0.0083731100163877,0.999229836075778,3,26,miRNA binding,MF,cell_exon_vs_cell_inex_goseq
GO:1900407,0.00843175260768991,0.998415930888418,5,62,regulation of cellular response to oxidative stress,BP,cell_exon_vs_cell_inex_goseq
GO:0110088,0.0085683151547234,0.999774400955673,2,4,hippocampal neuron apoptotic process,BP,cell_exon_vs_cell_inex_goseq
GO:0110089,0.0085683151547234,0.999774400955673,2,4,regulation of hippocampal neuron apoptotic process,BP,cell_exon_vs_cell_inex_goseq
GO:0045646,0.00857952972473457,0.998771289561499,4,40,regulation of erythrocyte differentiation,BP,cell_exon_vs_cell_inex_goseq
GO:0055038,0.00863242159912976,0.998359739957569,5,71,recycling endosome membrane,CC,cell_exon_vs_cell_inex_goseq
GO:0032689,0.0086410469128328,0.9992161218027,3,20,negative regulation of interferon-gamma production,BP,cell_exon_vs_cell_inex_goseq
GO:0000139,0.00874455727124823,0.996245302336758,15,440,Golgi membrane,CC,cell_exon_vs_cell_inex_goseq
GO:0150105,0.00876194599369702,0.999644490812745,2,14,protein localization to cell-cell junction,BP,cell_exon_vs_cell_inex_goseq
GO:0051253,0.00877048203693179,0.995154649186758,29,903,negative regulation of RNA metabolic process,BP,cell_exon_vs_cell_inex_goseq
GO:2000646,0.00877468751449848,0.999705782997174,2,6,positive regulation of receptor catabolic process,BP,cell_exon_vs_cell_inex_goseq
GO:0008360,0.00878367657066178,0.99797157534041,6,114,regulation of cell shape,BP,cell_exon_vs_cell_inex_goseq
GO:0006376,0.008803195960799,0.999181015340551,3,24,mRNA splice site selection,BP,cell_exon_vs_cell_inex_goseq
GO:0004364,0.00893789599612957,0.999195558258879,3,17,glutathione transferase activity,MF,cell_exon_vs_cell_inex_goseq
GO:0034154,0.00895058508034943,0.999651294309798,2,10,toll-like receptor 7 signaling pathway,BP,cell_exon_vs_cell_inex_goseq
GO:0072677,0.00897967035815486,0.999253469601968,3,11,eosinophil migration,BP,cell_exon_vs_cell_inex_goseq
GO:0042995,0.00902901698891273,0.994845668362285,32,1353,cell projection,CC,cell_exon_vs_cell_inex_goseq
GO:0034046,0.00906632972834083,0.999661392661905,2,8,poly(G) binding,MF,cell_exon_vs_cell_inex_goseq
GO:0046483,0.00907154194625189,0.993599197947512,98,3829,heterocycle metabolic process,BP,cell_exon_vs_cell_inex_goseq
GO:0042175,0.00920787829813008,0.995065070104895,26,798,nuclear outer membrane-endoplasmic reticulum membrane network,CC,cell_exon_vs_cell_inex_goseq
GO:0000289,0.00929587747368586,0.999108971494931,3,27,nuclear-transcribed mRNA poly(A) tail shortening,BP,cell_exon_vs_cell_inex_goseq
GO:2001187,0.00931185731939175,0.999647337931444,2,8,"positive regulation of CD8-positive, alpha-beta T cell activation",BP,cell_exon_vs_cell_inex_goseq
GO:0009968,0.00934132952938548,0.99511869883106,24,738,negative regulation of signal transduction,BP,cell_exon_vs_cell_inex_goseq
GO:0032757,0.00937239004218699,0.998232309160637,5,42,positive regulation of interleukin-8 production,BP,cell_exon_vs_cell_inex_goseq
GO:0044305,0.00940041431164281,0.999632198823586,2,9,calyx of Held,CC,cell_exon_vs_cell_inex_goseq
GO:0042267,0.00951110630748569,0.998601214478743,4,38,natural killer cell mediated cytotoxicity,BP,cell_exon_vs_cell_inex_goseq
GO:0045070,0.0095412763041907,0.999079480835241,3,26,positive regulation of viral genome replication,BP,cell_exon_vs_cell_inex_goseq
GO:0007399,0.00958796981839307,0.994328889251866,36,1407,nervous system development,BP,cell_exon_vs_cell_inex_goseq
GO:0019370,0.00961619483792898,0.999611088940774,2,10,leukotriene biosynthetic process,BP,cell_exon_vs_cell_inex_goseq
GO:0002228,0.0096203527181845,0.998578053780138,4,39,natural killer cell mediated immunity,BP,cell_exon_vs_cell_inex_goseq
GO:0071889,0.00966363776557091,0.99906046869926,3,27,14-3-3 protein binding,MF,cell_exon_vs_cell_inex_goseq
GO:1902563,0.00985588918750219,0.999615494491025,2,8,regulation of neutrophil activation,BP,cell_exon_vs_cell_inex_goseq
GO:0045732,0.00985991364121657,0.996793773793987,9,180,positive regulation of protein catabolic process,BP,cell_exon_vs_cell_inex_goseq
GO:0032607,0.00988588485357892,0.999044143572075,3,23,interferon-alpha production,BP,cell_exon_vs_cell_inex_goseq
GO:0032647,0.00988588485357892,0.999044143572075,3,23,regulation of interferon-alpha production,BP,cell_exon_vs_cell_inex_goseq
GO:2000059,0.0100219530816178,0.998500982637152,4,39,negative regulation of ubiquitin-dependent protein catabolic process,BP,cell_exon_vs_cell_inex_goseq
GO:0032956,0.0100479725920066,0.996481384104009,10,242,regulation of actin cytoskeleton organization,BP,cell_exon_vs_cell_inex_goseq
GO:0006123,0.010069838894492,0.999126568037965,3,11,"mitochondrial electron transport, cytochrome c to oxygen",BP,cell_exon_vs_cell_inex_goseq
GO:0051593,0.0100699861449962,0.999637105964778,2,6,response to folic acid,BP,cell_exon_vs_cell_inex_goseq
GO:0043299,0.0100705209348758,0.9984736987026,4,48,leukocyte degranulation,BP,cell_exon_vs_cell_inex_goseq
GO:2000116,0.0100885997250934,0.996713906787454,9,164,regulation of cysteine-type endopeptidase activity,BP,cell_exon_vs_cell_inex_goseq
GO:0006897,0.0101038214733824,0.995884986653814,13,388,endocytosis,BP,cell_exon_vs_cell_inex_goseq
GO:0032446,0.0101405296321715,0.994822323989859,22,665,protein modification by small protein conjugation,BP,cell_exon_vs_cell_inex_goseq
GO:0035740,0.0101542227428323,0.999612357135713,2,7,"CD8-positive, alpha-beta T cell proliferation",BP,cell_exon_vs_cell_inex_goseq
GO:2000564,0.0101542227428323,0.999612357135713,2,7,"regulation of CD8-positive, alpha-beta T cell proliferation",BP,cell_exon_vs_cell_inex_goseq
GO:0060711,0.0101615486346763,0.999003606644422,3,24,labyrinthine layer development,BP,cell_exon_vs_cell_inex_goseq
GO:0001936,0.0102126457466979,0.997985483996441,5,65,regulation of endothelial cell proliferation,BP,cell_exon_vs_cell_inex_goseq
GO:1903202,0.0102327052620616,0.998465478822784,4,37,negative regulation of oxidative stress-induced cell death,BP,cell_exon_vs_cell_inex_goseq
GO:0098754,0.0102694264135506,0.997247982615314,7,82,detoxification,BP,cell_exon_vs_cell_inex_goseq
GO:0043382,0.0102984269286249,0.999624479452276,2,6,positive regulation of memory T cell differentiation,BP,cell_exon_vs_cell_inex_goseq
GO:0035577,0.0103381707086942,0.998422835794753,4,47,azurophil granule membrane,CC,cell_exon_vs_cell_inex_goseq
GO:0071013,0.0104397610525024,0.997526527170811,6,80,catalytic step 2 spliceosome,CC,cell_exon_vs_cell_inex_goseq
GO:0050998,0.0104803672440866,0.99954911628425,2,11,nitric-oxide synthase binding,MF,cell_exon_vs_cell_inex_goseq
GO:0035868,0.0105129726278377,0.999972316202415,1,2,alphav-beta3 integrin-HMGB1 complex,CC,cell_exon_vs_cell_inex_goseq
GO:0032479,0.0105448714748028,0.997495078674382,6,81,regulation of type I interferon production,BP,cell_exon_vs_cell_inex_goseq
GO:0032606,0.0105448714748028,0.997495078674382,6,81,type I interferon production,BP,cell_exon_vs_cell_inex_goseq
GO:0002444,0.0106050898968165,0.997890028772986,5,64,myeloid leukocyte mediated immunity,BP,cell_exon_vs_cell_inex_goseq
GO:1900223,0.0106930017105903,0.999602316919611,2,6,positive regulation of amyloid-beta clearance,BP,cell_exon_vs_cell_inex_goseq
GO:1990000,0.0107737012530356,0.998916736079894,3,25,amyloid fibril formation,BP,cell_exon_vs_cell_inex_goseq
GO:0043524,0.0108082434351996,0.997407422691857,6,92,negative regulation of neuron apoptotic process,BP,cell_exon_vs_cell_inex_goseq
GO:0033209,0.0108354839917677,0.99741733494109,6,76,tumor necrosis factor-mediated signaling pathway,BP,cell_exon_vs_cell_inex_goseq
GO:1902882,0.010841912258585,0.997824490752707,5,69,regulation of response to oxidative stress,BP,cell_exon_vs_cell_inex_goseq
GO:2000343,0.0109809184081521,0.999546663572715,2,8,positive regulation of chemokine (C-X-C motif) ligand 2 production,BP,cell_exon_vs_cell_inex_goseq
GO:0008631,0.0109912554968964,0.998311150865942,4,39,intrinsic apoptotic signaling pathway in response to oxidative stress,BP,cell_exon_vs_cell_inex_goseq
GO:0004727,0.0109914670237581,1,1,1,prenylated protein tyrosine phosphatase activity,MF,cell_exon_vs_cell_inex_goseq
GO:0032685,0.0109936752396149,1,1,1,negative regulation of granulocyte macrophage colony-stimulating factor production,BP,cell_exon_vs_cell_inex_goseq
GO:0045600,0.0110198764576625,0.998297799358079,4,42,positive regulation of fat cell differentiation,BP,cell_exon_vs_cell_inex_goseq
GO:0098660,0.011112732146492,0.995099235973578,15,407,inorganic ion transmembrane transport,BP,cell_exon_vs_cell_inex_goseq
GO:0051623,0.0111456905499188,1,1,1,positive regulation of norepinephrine uptake,BP,cell_exon_vs_cell_inex_goseq
GO:0072749,0.0111456905499188,1,1,1,cellular response to cytochalasin B,BP,cell_exon_vs_cell_inex_goseq
GO:1901328,0.0111456905499188,1,1,1,response to cytochalasin B,BP,cell_exon_vs_cell_inex_goseq
GO:0040013,0.0111787473537081,0.996285504105042,9,193,negative regulation of locomotion,BP,cell_exon_vs_cell_inex_goseq
GO:0001934,0.0113289937991755,0.994989777074987,15,428,positive regulation of protein phosphorylation,BP,cell_exon_vs_cell_inex_goseq
GO:1900022,0.0113636759712562,1,1,1,regulation of D-erythro-sphingosine kinase activity,BP,cell_exon_vs_cell_inex_goseq
GO:0030957,0.0113823168849837,0.999507793854377,2,9,Tat protein binding,MF,cell_exon_vs_cell_inex_goseq
GO:1903753,0.0113830190095384,0.999538610941764,2,7,negative regulation of p38MAPK cascade,BP,cell_exon_vs_cell_inex_goseq
GO:1902236,0.0114621240788397,0.998869312828218,3,17,negative regulation of endoplasmic reticulum stress-induced intrinsic apoptotic signaling pathway,BP,cell_exon_vs_cell_inex_goseq
GO:0032355,0.0114638735931324,0.997231343331615,6,78,response to estradiol,BP,cell_exon_vs_cell_inex_goseq
GO:0000041,0.0114774012158246,0.997674839185954,5,62,transition metal ion transport,BP,cell_exon_vs_cell_inex_goseq
GO:0061157,0.0115199319987972,0.997648670287505,5,73,mRNA destabilization,BP,cell_exon_vs_cell_inex_goseq
GO:0032091,0.0115246959806211,0.997655225981121,5,67,negative regulation of protein binding,BP,cell_exon_vs_cell_inex_goseq
GO:0002580,0.0115631819340934,0.999745889150978,2,3,regulation of antigen processing and presentation of peptide or polysaccharide antigen via MHC class II,BP,cell_exon_vs_cell_inex_goseq
GO:0002586,0.0115631819340934,0.999745889150978,2,3,regulation of antigen processing and presentation of peptide antigen via MHC class II,BP,cell_exon_vs_cell_inex_goseq
GO:0033897,0.0116047246024394,1,1,1,ribonuclease T2 activity,MF,cell_exon_vs_cell_inex_goseq
GO:1903771,0.0116156168912049,1,1,1,positive regulation of beta-galactosidase activity,BP,cell_exon_vs_cell_inex_goseq
GO:1905572,0.0116156168912049,1,1,1,ganglioside GM1 transport to membrane,BP,cell_exon_vs_cell_inex_goseq
GO:1905573,0.0116156168912049,1,1,1,ganglioside GM1 binding,MF,cell_exon_vs_cell_inex_goseq
GO:1905574,0.0116156168912049,1,1,1,ganglioside GM2 binding,MF,cell_exon_vs_cell_inex_goseq
GO:1905575,0.0116156168912049,1,1,1,ganglioside GM3 binding,MF,cell_exon_vs_cell_inex_goseq
GO:1905577,0.0116156168912049,1,1,1,ganglioside GP1c binding,MF,cell_exon_vs_cell_inex_goseq
GO:2000567,0.0116484385439921,0.99996599369212,1,2,regulation of memory T cell activation,BP,cell_exon_vs_cell_inex_goseq
GO:2000568,0.0116484385439921,0.99996599369212,1,2,positive regulation of memory T cell activation,BP,cell_exon_vs_cell_inex_goseq
GO:0043547,0.0116505915813295,0.996735575125772,7,168,positive regulation of GTPase activity,BP,cell_exon_vs_cell_inex_goseq
GO:0071248,0.0117112687074053,0.996748802329917,7,109,cellular response to metal ion,BP,cell_exon_vs_cell_inex_goseq
GO:0031726,0.0117229621049803,0.999740482393049,2,3,CCR1 chemokine receptor binding,MF,cell_exon_vs_cell_inex_goseq
GO:2000503,0.0117229621049803,0.999740482393049,2,3,positive regulation of natural killer cell chemotaxis,BP,cell_exon_vs_cell_inex_goseq
GO:0050890,0.0117341256023701,0.996375202857562,8,164,cognition,BP,cell_exon_vs_cell_inex_goseq
GO:0007584,0.0117474723348618,0.997123770778662,6,100,response to nutrient,BP,cell_exon_vs_cell_inex_goseq
GO:0048662,0.0117581702865873,0.998187753873814,4,31,negative regulation of smooth muscle cell proliferation,BP,cell_exon_vs_cell_inex_goseq
GO:0005381,0.0117772502525876,0.999495595910161,2,8,iron ion transmembrane transporter activity,MF,cell_exon_vs_cell_inex_goseq
GO:0002718,0.0118116566814318,0.997586801997644,5,64,regulation of cytokine production involved in immune response,BP,cell_exon_vs_cell_inex_goseq
GO:0032528,0.0119372749471715,0.999426212706053,2,15,microvillus organization,BP,cell_exon_vs_cell_inex_goseq
GO:0097242,0.0120234841617415,0.998726407641061,3,29,amyloid-beta clearance,BP,cell_exon_vs_cell_inex_goseq
GO:0019209,0.0120309594330446,0.997516712652689,5,74,kinase activator activity,MF,cell_exon_vs_cell_inex_goseq
GO:0070727,0.012074384985422,0.992744667892896,36,1312,cellular macromolecule localization,BP,cell_exon_vs_cell_inex_goseq
GO:0072089,0.0121074453202483,0.998724915041586,3,26,stem cell proliferation,BP,cell_exon_vs_cell_inex_goseq
GO:0071404,0.0121501884577409,0.999410550273544,2,15,cellular response to low-density lipoprotein particle stimulus,BP,cell_exon_vs_cell_inex_goseq
GO:0051602,0.0121604834883631,0.998736400900155,3,22,response to electrical stimulus,BP,cell_exon_vs_cell_inex_goseq
GO:0010639,0.0121853924821255,0.995606513825508,10,244,negative regulation of organelle organization,BP,cell_exon_vs_cell_inex_goseq
GO:0032373,0.0123814699898476,0.998685221077573,3,26,positive regulation of sterol transport,BP,cell_exon_vs_cell_inex_goseq
GO:0032376,0.0123814699898476,0.998685221077573,3,26,positive regulation of cholesterol transport,BP,cell_exon_vs_cell_inex_goseq
GO:0061014,0.0124024719741116,0.997418275938412,5,76,positive regulation of mRNA catabolic process,BP,cell_exon_vs_cell_inex_goseq
GO:0061980,0.0124738582322602,0.998646572778057,3,34,regulatory RNA binding,MF,cell_exon_vs_cell_inex_goseq
GO:0070206,0.0125005294916987,0.999432190031597,2,9,protein trimerization,BP,cell_exon_vs_cell_inex_goseq
GO:0010595,0.0125891613469643,0.997376211515125,5,71,positive regulation of endothelial cell migration,BP,cell_exon_vs_cell_inex_goseq
GO:1904124,0.0125912259005264,0.999529952804752,2,5,microglial cell migration,BP,cell_exon_vs_cell_inex_goseq
GO:1904139,0.0125912259005264,0.999529952804752,2,5,regulation of microglial cell migration,BP,cell_exon_vs_cell_inex_goseq
GO:1904141,0.0125912259005264,0.999529952804752,2,5,positive regulation of microglial cell migration,BP,cell_exon_vs_cell_inex_goseq
GO:0002367,0.0126053918527951,0.997381167840078,5,65,cytokine production involved in immune response,BP,cell_exon_vs_cell_inex_goseq
GO:0002862,0.0126131270014656,0.998701083135865,3,18,negative regulation of inflammatory response to antigenic stimulus,BP,cell_exon_vs_cell_inex_goseq
GO:0051861,0.0126437984678139,0.99868808938954,3,19,glycolipid binding,MF,cell_exon_vs_cell_inex_goseq
GO:0010952,0.0126904904094742,0.996041498720453,8,137,positive regulation of peptidase activity,BP,cell_exon_vs_cell_inex_goseq
GO:0034145,0.0126944807563534,0.999434450057012,2,8,positive regulation of toll-like receptor 4 signaling pathway,BP,cell_exon_vs_cell_inex_goseq
GO:0048660,0.0127695585505272,0.996828209436247,6,89,regulation of smooth muscle cell proliferation,BP,cell_exon_vs_cell_inex_goseq
GO:0019058,0.0127802177035051,0.995107264521174,11,238,viral life cycle,BP,cell_exon_vs_cell_inex_goseq
GO:1903313,0.0127852550215796,0.996812830032132,6,99,positive regulation of mRNA metabolic process,BP,cell_exon_vs_cell_inex_goseq
GO:0070820,0.0129591995357738,0.996324476301988,7,116,tertiary granule,CC,cell_exon_vs_cell_inex_goseq
GO:0071672,0.0130133589598274,0.999572662693017,2,4,negative regulation of smooth muscle cell chemotaxis,BP,cell_exon_vs_cell_inex_goseq
GO:1904714,0.0130145120884911,0.999433953324156,2,7,regulation of chaperone-mediated autophagy,BP,cell_exon_vs_cell_inex_goseq
GO:0002192,0.013147445219312,1,1,1,IRES-dependent translational initiation of linear mRNA,BP,cell_exon_vs_cell_inex_goseq
GO:0110017,0.013147445219312,1,1,1,cap-independent translational initiation of linear mRNA,BP,cell_exon_vs_cell_inex_goseq
GO:0006924,0.0132372434367746,0.999419090378259,2,7,activation-induced cell death of T cells,BP,cell_exon_vs_cell_inex_goseq
GO:0034284,0.0135448100792875,0.995725848122699,8,137,response to monosaccharide,BP,cell_exon_vs_cell_inex_goseq
GO:0046332,0.0135460985349952,0.997741849373557,4,58,SMAD binding,MF,cell_exon_vs_cell_inex_goseq
GO:0046907,0.0135503756557328,0.992032853285274,32,1162,intracellular transport,BP,cell_exon_vs_cell_inex_goseq
GO:0044087,0.0136136154032299,0.993214034820803,19,654,regulation of cellular component biogenesis,BP,cell_exon_vs_cell_inex_goseq
GO:0010813,0.0136395548139478,1,1,1,neuropeptide catabolic process,BP,cell_exon_vs_cell_inex_goseq
GO:0030108,0.0136395548139478,1,1,1,HLA-A specific activating MHC class I receptor activity,MF,cell_exon_vs_cell_inex_goseq
GO:0031906,0.0136395548139478,1,1,1,late endosome lumen,CC,cell_exon_vs_cell_inex_goseq
GO:0032397,0.0136395548139478,1,1,1,activating MHC class I receptor activity,MF,cell_exon_vs_cell_inex_goseq
GO:0097486,0.0136395548139478,1,1,1,multivesicular body lumen,CC,cell_exon_vs_cell_inex_goseq
GO:0005751,0.0136432770190882,0.998647694023448,3,12,mitochondrial respiratory chain complex IV,CC,cell_exon_vs_cell_inex_goseq
GO:0061629,0.0136513297513066,0.994996751164686,10,230,RNA polymerase II-specific DNA-binding transcription factor binding,MF,cell_exon_vs_cell_inex_goseq
GO:0034765,0.0136812632993778,0.99529319268774,9,214,regulation of ion transmembrane transport,BP,cell_exon_vs_cell_inex_goseq
GO:0045619,0.0137058821479958,0.99607191690904,7,114,regulation of lymphocyte differentiation,BP,cell_exon_vs_cell_inex_goseq
GO:0099024,0.013782030834443,0.997703631825541,4,51,plasma membrane invagination,BP,cell_exon_vs_cell_inex_goseq
GO:0019958,0.0137830452045705,0.999952336715348,1,2,C-X-C chemokine binding,MF,cell_exon_vs_cell_inex_goseq
GO:0061614,0.0137868384554536,0.997725614850076,4,42,pri-miRNA transcription by RNA polymerase II,BP,cell_exon_vs_cell_inex_goseq
GO:0048143,0.0137912415348715,0.998555114820651,3,16,astrocyte activation,BP,cell_exon_vs_cell_inex_goseq
GO:0051209,0.0138219190377718,0.997683795597147,4,57,release of sequestered calcium ion into cytosol,BP,cell_exon_vs_cell_inex_goseq
GO:1902176,0.0139461944201626,0.998509060523586,3,18,negative regulation of oxidative stress-induced intrinsic apoptotic signaling pathway,BP,cell_exon_vs_cell_inex_goseq
GO:0050850,0.0139810052756683,0.998494043667413,3,19,positive regulation of calcium-mediated signaling,BP,cell_exon_vs_cell_inex_goseq
GO:0055065,0.0140122396373743,0.994061791696777,13,328,metal ion homeostasis,BP,cell_exon_vs_cell_inex_goseq
GO:0032272,0.0140932172194402,0.997624764781604,4,57,negative regulation of protein polymerization,BP,cell_exon_vs_cell_inex_goseq
GO:0090025,0.0140947848496302,0.998477191275778,3,19,regulation of monocyte chemotaxis,BP,cell_exon_vs_cell_inex_goseq
GO:0002604,0.0141093664715382,0.999440516136582,2,5,regulation of dendritic cell antigen processing and presentation,BP,cell_exon_vs_cell_inex_goseq
GO:0031667,0.0141130222772538,0.994249849079399,12,295,response to nutrient levels,BP,cell_exon_vs_cell_inex_goseq
GO:0045672,0.0141506657050821,0.998534787379144,3,14,positive regulation of osteoclast differentiation,BP,cell_exon_vs_cell_inex_goseq
GO:0051283,0.0142870435055162,0.99758066867134,4,58,negative regulation of sequestering of calcium ion,BP,cell_exon_vs_cell_inex_goseq
GO:0005102,0.0143107305412206,0.992237033216668,24,715,signaling receptor binding,MF,cell_exon_vs_cell_inex_goseq
GO:0048659,0.0144432845328794,0.996311005542903,6,92,smooth muscle cell proliferation,BP,cell_exon_vs_cell_inex_goseq
GO:0050830,0.0144462448623843,0.996977073785544,5,40,defense response to Gram-positive bacterium,BP,cell_exon_vs_cell_inex_goseq
GO:0055080,0.0144859950977033,0.993610839174251,14,375,cation homeostasis,BP,cell_exon_vs_cell_inex_goseq
GO:1900424,0.0144866437124339,0.999288854668861,2,9,regulation of defense response to bacterium,BP,cell_exon_vs_cell_inex_goseq
GO:2001020,0.0145303352005217,0.995334219809341,8,171,regulation of response to DNA damage stimulus,BP,cell_exon_vs_cell_inex_goseq
GO:0031086,0.0145631859714714,0.999362500154967,2,6,"nuclear-transcribed mRNA catabolic process, deadenylation-independent decay",BP,cell_exon_vs_cell_inex_goseq
GO:0036473,0.0145686233496628,0.996858443291396,5,67,cell death in response to oxidative stress,BP,cell_exon_vs_cell_inex_goseq
GO:0001935,0.0148995663841063,0.996760073422529,5,72,endothelial cell proliferation,BP,cell_exon_vs_cell_inex_goseq
GO:0005802,0.0149041656696912,0.995179232807928,8,199,trans-Golgi network,CC,cell_exon_vs_cell_inex_goseq
GO:0045935,0.0149118437079391,0.990905437926636,36,1259,positive regulation of nucleobase-containing compound metabolic process,BP,cell_exon_vs_cell_inex_goseq
GO:0050779,0.0149280760912259,0.996746046075347,5,76,RNA destabilization,BP,cell_exon_vs_cell_inex_goseq
GO:0031941,0.0149727536347242,0.999178708676594,2,17,filamentous actin,CC,cell_exon_vs_cell_inex_goseq
GO:0031492,0.0149778841489799,0.99752700384141,4,30,nucleosomal DNA binding,MF,cell_exon_vs_cell_inex_goseq
GO:0001961,0.015023507134362,0.997469071487795,4,39,positive regulation of cytokine-mediated signaling pathway,BP,cell_exon_vs_cell_inex_goseq
GO:0046631,0.0151527049520529,0.996076857822495,6,102,alpha-beta T cell activation,BP,cell_exon_vs_cell_inex_goseq
GO:0034351,0.0151679596386736,0.999237122689749,2,9,negative regulation of glial cell apoptotic process,BP,cell_exon_vs_cell_inex_goseq
GO:0002690,0.0152902197312012,0.996686139896198,5,57,positive regulation of leukocyte chemotaxis,BP,cell_exon_vs_cell_inex_goseq
GO:0046634,0.0152990029720699,0.996652856439912,5,71,regulation of alpha-beta T cell activation,BP,cell_exon_vs_cell_inex_goseq
GO:0042326,0.0153633541803067,0.993950787468755,11,262,negative regulation of phosphorylation,BP,cell_exon_vs_cell_inex_goseq
GO:0060395,0.0153821522503093,0.998190164160194,3,36,SMAD protein signal transduction,BP,cell_exon_vs_cell_inex_goseq
GO:0012502,0.0153977699567169,1,1,1,induction of programmed cell death,BP,cell_exon_vs_cell_inex_goseq
GO:0002292,0.0154075899822485,0.997354425315078,4,48,T cell differentiation involved in immune response,BP,cell_exon_vs_cell_inex_goseq
GO:0017055,0.015506298961953,0.999939620497141,1,2,negative regulation of RNA polymerase II transcription preinitiation complex assembly,BP,cell_exon_vs_cell_inex_goseq
GO:0072678,0.0155513457019312,0.997349001708673,4,40,T cell migration,BP,cell_exon_vs_cell_inex_goseq
GO:0019887,0.0156009662299785,0.994940919229118,8,149,protein kinase regulator activity,MF,cell_exon_vs_cell_inex_goseq
GO:0031053,0.0156120121083064,0.999160670397401,2,12,primary miRNA processing,BP,cell_exon_vs_cell_inex_goseq
GO:2000434,0.015617209770516,0.99920231688519,2,9,regulation of protein neddylation,BP,cell_exon_vs_cell_inex_goseq
GO:0051282,0.0156362650039648,0.997276956558206,4,60,regulation of sequestering of calcium ion,BP,cell_exon_vs_cell_inex_goseq
GO:0044297,0.0156630136079817,0.993516029999492,12,334,cell body,CC,cell_exon_vs_cell_inex_goseq
GO:0060401,0.0156719143901207,0.996517339542643,5,96,cytosolic calcium ion transport,BP,cell_exon_vs_cell_inex_goseq
GO:0051620,0.0157109431913153,0.999938009825587,1,2,norepinephrine uptake,BP,cell_exon_vs_cell_inex_goseq
GO:0051621,0.0157109431913153,0.999938009825587,1,2,regulation of norepinephrine uptake,BP,cell_exon_vs_cell_inex_goseq
GO:0001666,0.0157248903866162,0.994479959201432,9,183,response to hypoxia,BP,cell_exon_vs_cell_inex_goseq
GO:0000056,0.0157322346555421,0.999243582108758,2,7,ribosomal small subunit export from nucleus,BP,cell_exon_vs_cell_inex_goseq
GO:0032970,0.015771768799518,0.994077952966209,10,262,regulation of actin filament-based process,BP,cell_exon_vs_cell_inex_goseq
GO:0034220,0.015792496116808,0.992175024216461,18,544,ion transmembrane transport,BP,cell_exon_vs_cell_inex_goseq
GO:0046635,0.0157965223320956,0.997270367167824,4,47,positive regulation of alpha-beta T cell activation,BP,cell_exon_vs_cell_inex_goseq
GO:0060735,0.0158234999373639,1,1,1,regulation of eIF2 alpha phosphorylation by dsRNA,BP,cell_exon_vs_cell_inex_goseq
GO:1902629,0.0158234999373639,1,1,1,regulation of mRNA stability involved in cellular response to UV,BP,cell_exon_vs_cell_inex_goseq
GO:0055082,0.0158957827728301,0.992485140442846,16,437,cellular chemical homeostasis,BP,cell_exon_vs_cell_inex_goseq
GO:0006970,0.0160192259443121,0.997195878565532,4,57,response to osmotic stress,BP,cell_exon_vs_cell_inex_goseq
GO:0032587,0.0160333285921062,0.997164284126395,4,76,ruffle membrane,CC,cell_exon_vs_cell_inex_goseq
GO:0099577,0.0160644336158528,1,1,1,"regulation of translation at presynapse, modulating synaptic transmission",BP,cell_exon_vs_cell_inex_goseq
GO:0140244,0.0160644336158528,1,1,1,regulation of translation at presynapse,BP,cell_exon_vs_cell_inex_goseq
GO:0007611,0.0161273688170979,0.995203485288216,7,140,learning or memory,BP,cell_exon_vs_cell_inex_goseq
GO:0002768,0.0161322816558741,0.994720050675098,8,174,immune response-regulating cell surface receptor signaling pathway,BP,cell_exon_vs_cell_inex_goseq
GO:0030336,0.016135150990038,0.994723800503331,8,166,negative regulation of cell migration,BP,cell_exon_vs_cell_inex_goseq
GO:0002260,0.0162097051063448,0.997177383917872,4,47,lymphocyte homeostasis,BP,cell_exon_vs_cell_inex_goseq
GO:0000380,0.0163089963761357,0.997132001300817,4,56,"alternative mRNA splicing, via spliceosome",BP,cell_exon_vs_cell_inex_goseq
GO:0006874,0.0163998497130793,0.99418775842144,9,211,cellular calcium ion homeostasis,BP,cell_exon_vs_cell_inex_goseq
GO:0017130,0.0164135085355387,1,1,1,poly(C) RNA binding,MF,cell_exon_vs_cell_inex_goseq
GO:0098577,0.0164135085355387,1,1,1,inactive sex chromosome,CC,cell_exon_vs_cell_inex_goseq
GO:1902889,0.0164135085355387,1,1,1,protein localization to spindle microtubule,BP,cell_exon_vs_cell_inex_goseq
GO:1990280,0.0164135085355387,1,1,1,RNA localization to chromatin,BP,cell_exon_vs_cell_inex_goseq
GO:0016567,0.0164826501843805,0.991472111648284,20,619,protein ubiquitination,BP,cell_exon_vs_cell_inex_goseq
GO:1903977,0.0165750919094259,0.999149844383818,2,8,positive regulation of glial cell migration,BP,cell_exon_vs_cell_inex_goseq
GO:0051817,0.0165791963783418,0.996313932313255,5,64,modulation of process of other organism involved in symbiotic interaction,BP,cell_exon_vs_cell_inex_goseq
GO:0034384,0.016624024109309,0.999219288721634,2,6,high-density lipoprotein particle clearance,BP,cell_exon_vs_cell_inex_goseq
GO:0097158,0.0167817634832249,0.99992923317434,1,2,pre-mRNA intronic pyrimidine-rich binding,MF,cell_exon_vs_cell_inex_goseq
GO:0010934,0.016962016674209,0.999036464840622,2,13,macrophage cytokine production,BP,cell_exon_vs_cell_inex_goseq
GO:0010935,0.016962016674209,0.999036464840622,2,13,regulation of macrophage cytokine production,BP,cell_exon_vs_cell_inex_goseq
GO:0004051,0.0171639112733959,0.999925959152958,1,2,arachidonate 5-lipoxygenase activity,MF,cell_exon_vs_cell_inex_goseq
GO:0060429,0.0172078403986226,0.99157609753288,17,545,epithelium development,BP,cell_exon_vs_cell_inex_goseq
GO:0005125,0.0172956118929153,0.995482291006236,6,60,cytokine activity,MF,cell_exon_vs_cell_inex_goseq
GO:0060713,0.0173129464118751,0.999030205725295,2,11,labyrinthine layer morphogenesis,BP,cell_exon_vs_cell_inex_goseq
GO:0042824,0.0173207676482532,0.999123555409372,2,7,MHC class I peptide loading complex,CC,cell_exon_vs_cell_inex_goseq
GO:0060448,0.017324607091666,0.999924560098106,1,2,dichotomous subdivision of terminal units involved in lung branching,BP,cell_exon_vs_cell_inex_goseq
GO:0032358,0.0174160655299106,1,1,1,oxidized pyrimidine DNA binding,MF,cell_exon_vs_cell_inex_goseq
GO:0061481,0.0174160655299106,1,1,1,response to TNF agonist,BP,cell_exon_vs_cell_inex_goseq
GO:1902546,0.0174160655299106,1,1,1,positive regulation of DNA N-glycosylase activity,BP,cell_exon_vs_cell_inex_goseq
GO:2001272,0.0174160655299106,1,1,1,positive regulation of cysteine-type endopeptidase activity involved in execution phase of apoptosis,BP,cell_exon_vs_cell_inex_goseq
GO:0034688,0.0175929678448919,0.999922194232766,1,2,integrin alphaM-beta2 complex,CC,cell_exon_vs_cell_inex_goseq
GO:2000361,0.0175929678448919,0.999922194232766,1,2,regulation of prostaglandin-E synthase activity,BP,cell_exon_vs_cell_inex_goseq
GO:2000363,0.0175929678448919,0.999922194232766,1,2,positive regulation of prostaglandin-E synthase activity,BP,cell_exon_vs_cell_inex_goseq
GO:0060760,0.0176525179275606,0.996861754085673,4,43,positive regulation of response to cytokine stimulus,BP,cell_exon_vs_cell_inex_goseq
GO:0035259,0.017673134160596,0.998985503719169,2,12,glucocorticoid receptor binding,MF,cell_exon_vs_cell_inex_goseq
GO:0051098,0.0177112380699454,0.992886335381663,11,247,regulation of binding,BP,cell_exon_vs_cell_inex_goseq
GO:0034162,0.0178037635847658,0.998952518798543,2,14,toll-like receptor 9 signaling pathway,BP,cell_exon_vs_cell_inex_goseq
GO:0002643,0.0178841655732119,0.99895522959011,2,13,regulation of tolerance induction,BP,cell_exon_vs_cell_inex_goseq
GO:2000379,0.01795239499109,0.996780735720752,4,46,positive regulation of reactive oxygen species metabolic process,BP,cell_exon_vs_cell_inex_goseq
GO:0032872,0.0179569992056674,0.994552748867407,7,131,regulation of stress-activated MAPK cascade,BP,cell_exon_vs_cell_inex_goseq
GO:1901215,0.0179690844757913,0.994544548569955,7,135,negative regulation of neuron death,BP,cell_exon_vs_cell_inex_goseq
GO:0061944,0.0180510004306653,0.999918071072354,1,2,negative regulation of protein K48-linked ubiquitination,BP,cell_exon_vs_cell_inex_goseq
GO:0045638,0.0180852835581019,0.995910776891592,5,57,negative regulation of myeloid cell differentiation,BP,cell_exon_vs_cell_inex_goseq
GO:1903265,0.0180936617908687,0.998979658014085,2,10,positive regulation of tumor necrosis factor-mediated signaling pathway,BP,cell_exon_vs_cell_inex_goseq
GO:0000298,0.0183187373401134,0.999915611177263,1,2,endopolyphosphatase activity,MF,cell_exon_vs_cell_inex_goseq
GO:0008486,0.0183187373401134,0.999915611177263,1,2,diphosphoinositol-polyphosphate diphosphatase activity,MF,cell_exon_vs_cell_inex_goseq
GO:0034431,0.0183187373401134,0.999915611177263,1,2,bis(5'-adenosyl)-hexaphosphatase activity,MF,cell_exon_vs_cell_inex_goseq
GO:0034432,0.0183187373401134,0.999915611177263,1,2,bis(5'-adenosyl)-pentaphosphatase activity,MF,cell_exon_vs_cell_inex_goseq
GO:0052840,0.0183187373401134,0.999915611177263,1,2,inositol diphosphate tetrakisphosphate diphosphatase activity,MF,cell_exon_vs_cell_inex_goseq
GO:0052842,0.0183187373401134,0.999915611177263,1,2,inositol diphosphate pentakisphosphate diphosphatase activity,MF,cell_exon_vs_cell_inex_goseq
GO:0071543,0.0183187373401134,0.999915611177263,1,2,diphosphoinositol polyphosphate metabolic process,BP,cell_exon_vs_cell_inex_goseq
GO:1901906,0.0183187373401134,0.999915611177263,1,2,diadenosine pentaphosphate metabolic process,BP,cell_exon_vs_cell_inex_goseq
GO:1901907,0.0183187373401134,0.999915611177263,1,2,diadenosine pentaphosphate catabolic process,BP,cell_exon_vs_cell_inex_goseq
GO:1901908,0.0183187373401134,0.999915611177263,1,2,diadenosine hexaphosphate metabolic process,BP,cell_exon_vs_cell_inex_goseq
GO:1901909,0.0183187373401134,0.999915611177263,1,2,diadenosine hexaphosphate catabolic process,BP,cell_exon_vs_cell_inex_goseq
GO:1901910,0.0183187373401134,0.999915611177263,1,2,adenosine 5'-(hexahydrogen pentaphosphate) metabolic process,BP,cell_exon_vs_cell_inex_goseq
GO:1901911,0.0183187373401134,0.999915611177263,1,2,adenosine 5'-(hexahydrogen pentaphosphate) catabolic process,BP,cell_exon_vs_cell_inex_goseq
GO:0120146,0.0183465547678425,0.999091887558744,2,6,sulfatide binding,MF,cell_exon_vs_cell_inex_goseq
GO:0070527,0.0183724208725334,0.996686304470695,4,45,platelet aggregation,BP,cell_exon_vs_cell_inex_goseq
GO:0001894,0.0184745419203597,0.994355458407846,7,140,tissue homeostasis,BP,cell_exon_vs_cell_inex_goseq
GO:2001171,0.0185217816774945,0.998964426516829,2,9,positive regulation of ATP biosynthetic process,BP,cell_exon_vs_cell_inex_goseq
GO:0006873,0.018619834869668,0.991805523903254,13,340,cellular ion homeostasis,BP,cell_exon_vs_cell_inex_goseq
GO:0002707,0.01863207893591,0.997671073123657,3,30,negative regulation of lymphocyte mediated immunity,BP,cell_exon_vs_cell_inex_goseq
GO:0055074,0.0186646695492453,0.993237832111301,9,216,calcium ion homeostasis,BP,cell_exon_vs_cell_inex_goseq
GO:2000644,0.0186651259761895,0.998929911008115,2,10,regulation of receptor catabolic process,BP,cell_exon_vs_cell_inex_goseq
GO:0070302,0.0186713989916339,0.994288861881195,7,134,regulation of stress-activated protein kinase signaling cascade,BP,cell_exon_vs_cell_inex_goseq
GO:0048260,0.0187975224391672,0.997612495431907,3,37,positive regulation of receptor-mediated endocytosis,BP,cell_exon_vs_cell_inex_goseq
GO:0072559,0.0188968507424659,0.998960825959881,2,8,NLRP3 inflammasome complex,CC,cell_exon_vs_cell_inex_goseq
GO:0001892,0.018981869641233,0.996531375675006,4,48,embryonic placenta development,BP,cell_exon_vs_cell_inex_goseq
GO:0048678,0.0189891117361486,0.996522884449117,4,50,response to axon injury,BP,cell_exon_vs_cell_inex_goseq
GO:0043270,0.019171033331092,0.994105049102688,7,134,positive regulation of ion transport,BP,cell_exon_vs_cell_inex_goseq
GO:0032945,0.0192184728010987,0.996475054467145,4,48,negative regulation of mononuclear cell proliferation,BP,cell_exon_vs_cell_inex_goseq
GO:0050672,0.0192184728010987,0.996475054467145,4,48,negative regulation of lymphocyte proliferation,BP,cell_exon_vs_cell_inex_goseq
GO:0060671,0.0192430474673966,0.999906836494708,1,2,epithelial cell differentiation involved in embryonic placenta development,BP,cell_exon_vs_cell_inex_goseq
GO:0060672,0.0192430474673966,0.999906836494708,1,2,epithelial cell morphogenesis involved in placental branching,BP,cell_exon_vs_cell_inex_goseq
GO:0015961,0.0192821128037065,0.99987540989322,1,3,diadenosine polyphosphate catabolic process,BP,cell_exon_vs_cell_inex_goseq
GO:0030369,0.0194731318101133,0.99990458413461,1,2,ICAM-3 receptor activity,MF,cell_exon_vs_cell_inex_goseq
GO:0034687,0.0194731318101133,0.99990458413461,1,2,integrin alphaL-beta2 complex,CC,cell_exon_vs_cell_inex_goseq
GO:0006898,0.0196547031734138,0.993896285601954,7,171,receptor-mediated endocytosis,BP,cell_exon_vs_cell_inex_goseq
GO:0043171,0.0197808979748405,0.998780978934926,2,13,peptide catabolic process,BP,cell_exon_vs_cell_inex_goseq
GO:0071241,0.0197908682069907,0.993881024576298,7,129,cellular response to inorganic substance,BP,cell_exon_vs_cell_inex_goseq
GO:0051968,0.0198220910157703,0.99880697876168,2,11,"positive regulation of synaptic transmission, glutamatergic",BP,cell_exon_vs_cell_inex_goseq
GO:0035925,0.019825602860844,0.997538064283864,3,21,mRNA 3'-UTR AU-rich region binding,MF,cell_exon_vs_cell_inex_goseq
GO:0000956,0.0198665522573376,0.994537574596647,6,103,nuclear-transcribed mRNA catabolic process,BP,cell_exon_vs_cell_inex_goseq
GO:0051764,0.0198709034248362,0.998877588888461,2,8,actin crosslink formation,BP,cell_exon_vs_cell_inex_goseq
GO:0034762,0.0199274228259216,0.992235290293565,10,272,regulation of transmembrane transport,BP,cell_exon_vs_cell_inex_goseq
GO:0031730,0.0199515084667269,0.998911384095748,2,7,CCR5 chemokine receptor binding,MF,cell_exon_vs_cell_inex_goseq
GO:0043200,0.0200211099916862,0.995309452143734,5,72,response to amino acid,BP,cell_exon_vs_cell_inex_goseq
GO:0043029,0.0200631151138159,0.997448306675561,3,26,T cell homeostasis,BP,cell_exon_vs_cell_inex_goseq
GO:0001933,0.0200851632253027,0.992181641626046,10,233,negative regulation of protein phosphorylation,BP,cell_exon_vs_cell_inex_goseq
GO:0097011,0.0201205804442695,0.998855887660568,2,8,cellular response to granulocyte macrophage colony-stimulating factor stimulus,BP,cell_exon_vs_cell_inex_goseq
GO:0097012,0.0201205804442695,0.998855887660568,2,8,response to granulocyte macrophage colony-stimulating factor,BP,cell_exon_vs_cell_inex_goseq
GO:0036293,0.0203542447265293,0.992531385044902,9,193,response to decreased oxygen levels,BP,cell_exon_vs_cell_inex_goseq
GO:2001028,0.0204953561537594,0.998823036492852,2,8,positive regulation of endothelial cell chemotaxis,BP,cell_exon_vs_cell_inex_goseq
GO:0048871,0.0205167798643569,0.99156275401216,11,280,multicellular organismal homeostasis,BP,cell_exon_vs_cell_inex_goseq
GO:0045185,0.0206455177818642,0.99513278615632,5,69,maintenance of protein location,BP,cell_exon_vs_cell_inex_goseq
GO:0120025,0.0206571669293362,0.987747464432039,29,1287,plasma membrane bounded cell projection,CC,cell_exon_vs_cell_inex_goseq
GO:1905051,0.0207471476114688,0.999891620383953,1,2,regulation of base-excision repair,BP,cell_exon_vs_cell_inex_goseq
GO:1905053,0.0207471476114688,0.999891620383953,1,2,positive regulation of base-excision repair,BP,cell_exon_vs_cell_inex_goseq
GO:0051208,0.0207973918435254,0.996046668177262,4,64,sequestering of calcium ion,BP,cell_exon_vs_cell_inex_goseq
GO:0050877,0.0208435168082193,0.99007651398522,15,467,nervous system process,BP,cell_exon_vs_cell_inex_goseq
GO:0002414,0.020955550968521,1,1,1,immunoglobulin transcytosis in epithelial cells,BP,cell_exon_vs_cell_inex_goseq
GO:0002416,0.020955550968521,1,1,1,IgG immunoglobulin transcytosis in epithelial cells mediated by FcRn immunoglobulin receptor,BP,cell_exon_vs_cell_inex_goseq
GO:0043380,0.021037882713131,0.99877489714189,2,8,regulation of memory T cell differentiation,BP,cell_exon_vs_cell_inex_goseq
GO:0051591,0.0210479304516204,0.996021018618454,4,51,response to cAMP,BP,cell_exon_vs_cell_inex_goseq
GO:0005539,0.0210599764435608,0.994988173203684,5,78,glycosaminoglycan binding,MF,cell_exon_vs_cell_inex_goseq
GO:0003743,0.0210834668357373,0.996036502563138,4,45,translation initiation factor activity,MF,cell_exon_vs_cell_inex_goseq
GO:0036284,0.0211240363353218,0.999887625427889,1,2,tubulobulbar complex,CC,cell_exon_vs_cell_inex_goseq
GO:0031984,0.0211977737162422,0.987415800520253,29,1011,organelle subcompartment,CC,cell_exon_vs_cell_inex_goseq
GO:0010324,0.021234216692703,0.995953166818204,4,58,membrane invagination,BP,cell_exon_vs_cell_inex_goseq
GO:0060263,0.0213990389533503,0.998680565021269,2,10,regulation of respiratory burst,BP,cell_exon_vs_cell_inex_goseq
GO:0060698,0.0214276309647768,0.999884354224052,1,2,endoribonuclease inhibitor activity,MF,cell_exon_vs_cell_inex_goseq
GO:0060701,0.0214276309647768,0.999884354224052,1,2,negative regulation of ribonuclease activity,BP,cell_exon_vs_cell_inex_goseq
GO:0060702,0.0214276309647768,0.999884354224052,1,2,negative regulation of endoribonuclease activity,BP,cell_exon_vs_cell_inex_goseq
GO:0097553,0.0214528543538222,0.995873250218234,4,69,calcium ion transmembrane import into cytosol,BP,cell_exon_vs_cell_inex_goseq
GO:0002419,0.0214884515045673,0.999883693183807,1,2,T cell mediated cytotoxicity directed against tumor cell target,BP,cell_exon_vs_cell_inex_goseq
GO:0043615,0.0215027915460056,0.998841197869349,2,6,astrocyte cell migration,BP,cell_exon_vs_cell_inex_goseq
GO:0032733,0.0215142126508922,0.99720915034692,3,24,positive regulation of interleukin-10 production,BP,cell_exon_vs_cell_inex_goseq
GO:0010874,0.0215321198474517,0.997187226058105,3,26,regulation of cholesterol efflux,BP,cell_exon_vs_cell_inex_goseq
GO:0010950,0.0215698192831607,0.993221091499362,7,124,positive regulation of endopeptidase activity,BP,cell_exon_vs_cell_inex_goseq
GO:0043525,0.0217698576366135,0.995900929747164,4,39,positive regulation of neuron apoptotic process,BP,cell_exon_vs_cell_inex_goseq
GO:0016846,0.0218084687517541,0.998641646663675,2,10,carbon-sulfur lyase activity,MF,cell_exon_vs_cell_inex_goseq
GO:0042327,0.0218459016821863,0.989536927423726,15,477,positive regulation of phosphorylation,BP,cell_exon_vs_cell_inex_goseq
GO:0043005,0.0218749954620467,0.988328402138049,20,784,neuron projection,CC,cell_exon_vs_cell_inex_goseq
GO:0098791,0.0218802620997776,0.99134321491586,10,282,Golgi apparatus subcompartment,CC,cell_exon_vs_cell_inex_goseq
GO:0009445,0.0218945288425049,0.998808581919801,2,6,putrescine metabolic process,BP,cell_exon_vs_cell_inex_goseq
GO:0022898,0.0219520881041034,0.993791895356334,6,131,regulation of transmembrane transporter activity,BP,cell_exon_vs_cell_inex_goseq
GO:0002700,0.0220325922638455,0.993798327632143,6,104,regulation of production of molecular mediator of immune response,BP,cell_exon_vs_cell_inex_goseq
GO:0002702,0.0220386711276718,0.994696232170458,5,77,positive regulation of production of molecular mediator of immune response,BP,cell_exon_vs_cell_inex_goseq
GO:0002689,0.0220599577056807,0.998594427208383,2,11,negative regulation of leukocyte chemotaxis,BP,cell_exon_vs_cell_inex_goseq
GO:0150077,0.0220631262791906,0.997177655178125,3,19,regulation of neuroinflammatory response,BP,cell_exon_vs_cell_inex_goseq
GO:2000736,0.022065483470175,0.99703184933033,3,35,regulation of stem cell differentiation,BP,cell_exon_vs_cell_inex_goseq
GO:0050792,0.022110121723932,0.993017878146686,7,123,regulation of viral process,BP,cell_exon_vs_cell_inex_goseq
GO:0006096,0.02215888874367,0.99572822326341,4,56,glycolytic process,BP,cell_exon_vs_cell_inex_goseq
GO:0008298,0.0221821606669795,0.99860577500233,2,10,intracellular mRNA localization,BP,cell_exon_vs_cell_inex_goseq
GO:0030330,0.022221993039651,0.995722285374012,4,53,"DNA damage response, signal transduction by p53 class mediator",BP,cell_exon_vs_cell_inex_goseq
GO:0071417,0.0223757734366534,0.990250582777873,12,379,cellular response to organonitrogen compound,BP,cell_exon_vs_cell_inex_goseq
GO:0031490,0.0224153734244638,0.994597357608196,5,71,chromatin DNA binding,MF,cell_exon_vs_cell_inex_goseq
GO:0006757,0.0224164982430211,0.995660319468517,4,57,ATP generation from ADP,BP,cell_exon_vs_cell_inex_goseq
GO:1901379,0.0224215195737535,0.996930716506576,3,44,regulation of potassium ion transmembrane transport,BP,cell_exon_vs_cell_inex_goseq
GO:0070069,0.0224259361857182,0.995906865747156,4,24,cytochrome complex,CC,cell_exon_vs_cell_inex_goseq
GO:0007041,0.0224407517516943,0.994540367748837,5,95,lysosomal transport,BP,cell_exon_vs_cell_inex_goseq
GO:0010648,0.0225128736566684,0.987257908490496,24,794,negative regulation of cell communication,BP,cell_exon_vs_cell_inex_goseq
GO:0042610,0.0226136541327493,0.999828378796847,1,3,CD8 receptor binding,MF,cell_exon_vs_cell_inex_goseq
GO:0023057,0.0226754842229408,0.987157065045513,24,795,negative regulation of signaling,BP,cell_exon_vs_cell_inex_goseq
GO:0032075,0.0226898195043476,0.998624133604556,2,8,positive regulation of nuclease activity,BP,cell_exon_vs_cell_inex_goseq
GO:0150076,0.0227120311105225,0.997045413718042,3,20,neuroinflammatory response,BP,cell_exon_vs_cell_inex_goseq
GO:0140131,0.0228756758695014,0.998538324513061,2,10,positive regulation of lymphocyte chemotaxis,BP,cell_exon_vs_cell_inex_goseq
GO:2000178,0.0228904141722323,0.998475323881417,2,13,negative regulation of neural precursor cell proliferation,BP,cell_exon_vs_cell_inex_goseq
GO:0043379,0.0229020378536186,0.998565973588665,2,9,memory T cell differentiation,BP,cell_exon_vs_cell_inex_goseq
GO:0097413,0.0230045714380423,0.998594704293957,2,8,Lewy body,CC,cell_exon_vs_cell_inex_goseq
GO:0034156,0.0231130122968115,1,1,1,negative regulation of toll-like receptor 7 signaling pathway,BP,cell_exon_vs_cell_inex_goseq
GO:0140052,0.0231378058606796,0.998633188257706,2,7,cellular response to oxidised low-density lipoprotein particle stimulus,BP,cell_exon_vs_cell_inex_goseq
GO:0050868,0.0231578384606278,0.994363191709011,5,74,negative regulation of T cell activation,BP,cell_exon_vs_cell_inex_goseq
GO:1902229,0.0231702945147872,0.996887713631123,3,26,regulation of intrinsic apoptotic signaling pathway in response to DNA damage,BP,cell_exon_vs_cell_inex_goseq
GO:0070391,0.0232011054991592,0.998576215604956,2,8,response to lipoteichoic acid,BP,cell_exon_vs_cell_inex_goseq
GO:0071223,0.0232011054991592,0.998576215604956,2,8,cellular response to lipoteichoic acid,BP,cell_exon_vs_cell_inex_goseq
GO:0002832,0.0232045374744999,0.994336522439319,5,79,negative regulation of response to biotic stimulus,BP,cell_exon_vs_cell_inex_goseq
GO:0043023,0.0232093087316408,0.998442622112638,2,13,ribosomal large subunit binding,MF,cell_exon_vs_cell_inex_goseq
GO:0010562,0.0232605390658109,0.988481478698669,16,522,positive regulation of phosphorus metabolic process,BP,cell_exon_vs_cell_inex_goseq
GO:0045937,0.0232605390658109,0.988481478698669,16,522,positive regulation of phosphate metabolic process,BP,cell_exon_vs_cell_inex_goseq
GO:0045647,0.0233116728156509,0.998617364433022,2,7,negative regulation of erythrocyte differentiation,BP,cell_exon_vs_cell_inex_goseq
GO:0046006,0.0234953007387346,0.996848299608654,3,24,regulation of activated T cell proliferation,BP,cell_exon_vs_cell_inex_goseq
GO:0022411,0.0235074734235569,0.989702402277502,12,327,cellular component disassembly,BP,cell_exon_vs_cell_inex_goseq
GO:2001026,0.0236657469877352,0.998460107600896,2,10,regulation of endothelial cell chemotaxis,BP,cell_exon_vs_cell_inex_goseq
GO:0150079,0.0237182226693521,0.99848673506518,2,9,negative regulation of neuroinflammatory response,BP,cell_exon_vs_cell_inex_goseq
GO:1903019,0.0237388292935259,0.998426984166081,2,11,negative regulation of glycoprotein metabolic process,BP,cell_exon_vs_cell_inex_goseq
GO:0061702,0.0238258432924055,0.998418123680206,2,11,inflammasome complex,CC,cell_exon_vs_cell_inex_goseq
GO:0038095,0.0238313527349365,0.998291559964387,2,22,Fc-epsilon receptor signaling pathway,BP,cell_exon_vs_cell_inex_goseq
GO:0034689,0.0238357261252406,0.999856724490913,1,2,integrin alphaX-beta2 complex,CC,cell_exon_vs_cell_inex_goseq
GO:0010837,0.0238728481719498,0.998373789558772,2,13,regulation of keratinocyte proliferation,BP,cell_exon_vs_cell_inex_goseq
GO:0002583,0.0240246959851718,0.998732779564934,2,5,regulation of antigen processing and presentation of peptide antigen,BP,cell_exon_vs_cell_inex_goseq
GO:0006691,0.0240397279811654,0.998315744442085,2,16,leukotriene metabolic process,BP,cell_exon_vs_cell_inex_goseq
GO:0090715,0.0241014354738017,0.998416354705566,2,10,immunological memory formation process,BP,cell_exon_vs_cell_inex_goseq
GO:0043087,0.0241631037287385,0.991442758993898,8,240,regulation of GTPase activity,BP,cell_exon_vs_cell_inex_goseq
GO:0036477,0.0241937194695355,0.988580811011007,14,491,somatodendritic compartment,CC,cell_exon_vs_cell_inex_goseq
GO:0051495,0.0242250018406866,0.992162817653844,7,160,positive regulation of cytoskeleton organization,BP,cell_exon_vs_cell_inex_goseq
GO:0007517,0.0242559044617208,0.991458501926693,8,162,muscle organ development,BP,cell_exon_vs_cell_inex_goseq
GO:0043025,0.0242617597058396,0.990240085468483,10,285,neuronal cell body,CC,cell_exon_vs_cell_inex_goseq
GO:0071670,0.0243320256436646,0.998707698592632,2,5,smooth muscle cell chemotaxis,BP,cell_exon_vs_cell_inex_goseq
GO:0071671,0.0243320256436646,0.998707698592632,2,5,regulation of smooth muscle cell chemotaxis,BP,cell_exon_vs_cell_inex_goseq
GO:0007040,0.0244127587232557,0.995149893035677,4,57,lysosome organization,BP,cell_exon_vs_cell_inex_goseq
GO:0080171,0.0244127587232557,0.995149893035677,4,57,lytic vacuole organization,BP,cell_exon_vs_cell_inex_goseq
GO:0009891,0.0246083156933332,0.984421145027933,36,1290,positive regulation of biosynthetic process,BP,cell_exon_vs_cell_inex_goseq
GO:0046456,0.0246299624596108,0.996594610156873,3,28,icosanoid biosynthetic process,BP,cell_exon_vs_cell_inex_goseq
GO:0033273,0.0246937026548452,0.995104458538755,4,50,response to vitamin,BP,cell_exon_vs_cell_inex_goseq
GO:0006407,0.0247664155974834,0.99984524380569,1,2,rRNA export from nucleus,BP,cell_exon_vs_cell_inex_goseq
GO:1903051,0.0248431914039398,0.99507037569319,4,49,negative regulation of proteolysis involved in cellular protein catabolic process,BP,cell_exon_vs_cell_inex_goseq
GO:0043393,0.024851138721773,0.991937452797635,7,142,regulation of protein binding,BP,cell_exon_vs_cell_inex_goseq
GO:1990090,0.0248772012710754,0.99647306486023,3,40,cellular response to nerve growth factor stimulus,BP,cell_exon_vs_cell_inex_goseq
GO:0097062,0.0248886616443095,0.99823591154628,2,15,dendritic spine maintenance,BP,cell_exon_vs_cell_inex_goseq
GO:0044754,0.0248983763118716,0.998307459136273,2,11,autolysosome,CC,cell_exon_vs_cell_inex_goseq
GO:0001097,0.0249008099852375,0.999843548938425,1,2,TFIIH-class transcription factor complex binding,MF,cell_exon_vs_cell_inex_goseq
GO:0045277,0.0249351710757115,0.996761773083626,3,15,respiratory chain complex IV,CC,cell_exon_vs_cell_inex_goseq
GO:0030810,0.0250920919600943,0.998315250763202,2,10,positive regulation of nucleotide biosynthetic process,BP,cell_exon_vs_cell_inex_goseq
GO:1900373,0.0250920919600943,0.998315250763202,2,10,positive regulation of purine nucleotide biosynthetic process,BP,cell_exon_vs_cell_inex_goseq
GO:0034159,0.0252514393858355,0.999839083083271,1,2,regulation of toll-like receptor 8 signaling pathway,BP,cell_exon_vs_cell_inex_goseq
GO:0034161,0.0252514393858355,0.999839083083271,1,2,positive regulation of toll-like receptor 8 signaling pathway,BP,cell_exon_vs_cell_inex_goseq
GO:0032409,0.0255635351516654,0.992507814453142,6,140,regulation of transporter activity,BP,cell_exon_vs_cell_inex_goseq
GO:0022408,0.025730443088752,0.9924813192862,6,114,negative regulation of cell-cell adhesion,BP,cell_exon_vs_cell_inex_goseq
GO:0046598,0.0257697405165419,0.998280929728925,2,9,positive regulation of viral entry into host cell,BP,cell_exon_vs_cell_inex_goseq
GO:0075294,0.0257697405165419,0.998280929728925,2,9,positive regulation by symbiont of entry into host,BP,cell_exon_vs_cell_inex_goseq
GO:0014706,0.0257724684868976,0.990799611850231,8,184,striated muscle tissue development,BP,cell_exon_vs_cell_inex_goseq
GO:0071651,0.025776811111933,0.999832272411156,1,2,positive regulation of chemokine (C-C motif) ligand 5 production,BP,cell_exon_vs_cell_inex_goseq
GO:0050679,0.0258144058198493,0.993500599460247,5,89,positive regulation of epithelial cell proliferation,BP,cell_exon_vs_cell_inex_goseq
GO:0007492,0.0258617511988242,0.996293476489832,3,37,endoderm development,BP,cell_exon_vs_cell_inex_goseq
GO:1990089,0.0260180953092244,0.996239077192254,3,42,response to nerve growth factor,BP,cell_exon_vs_cell_inex_goseq
GO:0051385,0.0260936464622006,0.996440598325202,3,19,response to mineralocorticoid,BP,cell_exon_vs_cell_inex_goseq
GO:0033120,0.0261665205948828,0.996279683722129,3,30,positive regulation of RNA splicing,BP,cell_exon_vs_cell_inex_goseq
GO:0008047,0.0262112559716796,0.993409487299696,5,75,enzyme activator activity,MF,cell_exon_vs_cell_inex_goseq
GO:2000426,0.0262358708633452,0.999826204269129,1,2,negative regulation of apoptotic cell clearance,BP,cell_exon_vs_cell_inex_goseq
GO:0098631,0.0263086183570784,0.99620467751471,3,37,cell adhesion mediator activity,MF,cell_exon_vs_cell_inex_goseq
GO:1901699,0.0264265959333961,0.987780148559088,13,417,cellular response to nitrogen compound,BP,cell_exon_vs_cell_inex_goseq
GO:0045765,0.0266129736702801,0.990469533967831,8,158,regulation of angiogenesis,BP,cell_exon_vs_cell_inex_goseq
GO:1901342,0.0267852462614392,0.990395001040612,8,159,regulation of vasculature development,BP,cell_exon_vs_cell_inex_goseq
GO:0070324,0.0268677574770475,0.999757265681361,1,3,thyroid hormone binding,MF,cell_exon_vs_cell_inex_goseq
GO:0120020,0.026931150115906,0.998064708526954,2,12,cholesterol transfer activity,MF,cell_exon_vs_cell_inex_goseq
GO:0043616,0.0270809382235735,0.997977792566408,2,16,keratinocyte proliferation,BP,cell_exon_vs_cell_inex_goseq
GO:0019219,0.0271257705051439,0.980827532683615,64,2553,regulation of nucleobase-containing compound metabolic process,BP,cell_exon_vs_cell_inex_goseq
GO:1990830,0.0271409768872989,0.994426793533443,4,58,cellular response to leukemia inhibitory factor,BP,cell_exon_vs_cell_inex_goseq
GO:0034613,0.0271419120470811,0.982899507724749,34,1302,cellular protein localization,BP,cell_exon_vs_cell_inex_goseq
GO:0009048,0.027145859859783,0.997984329750846,2,15,dosage compensation by inactivation of X chromosome,BP,cell_exon_vs_cell_inex_goseq
GO:0034350,0.0272715057651647,0.998053239704045,2,11,regulation of glial cell apoptotic process,BP,cell_exon_vs_cell_inex_goseq
GO:0010815,0.0272937841120106,0.999749458309084,1,3,bradykinin catabolic process,BP,cell_exon_vs_cell_inex_goseq
GO:0009749,0.0273294733523117,0.990979930232206,7,128,response to glucose,BP,cell_exon_vs_cell_inex_goseq
GO:1990823,0.0273470526873694,0.994367752177319,4,59,response to leukemia inhibitory factor,BP,cell_exon_vs_cell_inex_goseq
GO:0043315,0.0273753349742548,0.999747949538727,1,3,positive regulation of neutrophil degranulation,BP,cell_exon_vs_cell_inex_goseq
GO:1902565,0.0273753349742548,0.999747949538727,1,3,positive regulation of neutrophil activation,BP,cell_exon_vs_cell_inex_goseq
GO:0008266,0.0274487073945225,0.997902009638325,2,19,poly(U) RNA binding,MF,cell_exon_vs_cell_inex_goseq
GO:0002673,0.0274488624554788,0.996106729460104,3,23,regulation of acute inflammatory response,BP,cell_exon_vs_cell_inex_goseq
GO:0061850,0.0275088897235508,1,1,1,growth cone leading edge,CC,cell_exon_vs_cell_inex_goseq
GO:0050765,0.0275149957951188,0.997904127238804,2,18,negative regulation of phagocytosis,BP,cell_exon_vs_cell_inex_goseq
GO:0071676,0.0276082286560486,0.997966932349569,2,13,negative regulation of mononuclear cell migration,BP,cell_exon_vs_cell_inex_goseq
GO:0031398,0.0276393927512319,0.992912323191384,5,91,positive regulation of protein ubiquitination,BP,cell_exon_vs_cell_inex_goseq
GO:0032507,0.0276962017430144,0.994307873191475,4,51,maintenance of protein location in cell,BP,cell_exon_vs_cell_inex_goseq
GO:1902037,0.0277272134989772,0.999741386853171,1,3,negative regulation of hematopoietic stem cell differentiation,BP,cell_exon_vs_cell_inex_goseq
GO:0006140,0.0277289499510405,0.994304161607889,4,50,regulation of nucleotide metabolic process,BP,cell_exon_vs_cell_inex_goseq
GO:1900542,0.0277289499510405,0.994304161607889,4,50,regulation of purine nucleotide metabolic process,BP,cell_exon_vs_cell_inex_goseq
GO:0060143,0.027821461234166,0.997942738277331,2,13,positive regulation of syncytium formation by plasma membrane fusion,BP,cell_exon_vs_cell_inex_goseq
GO:0050798,0.0279123466695973,0.995962203237711,3,27,activated T cell proliferation,BP,cell_exon_vs_cell_inex_goseq
GO:0044546,0.0280728822587374,0.99796454349377,2,11,NLRP3 inflammasome complex assembly,BP,cell_exon_vs_cell_inex_goseq
GO:1900225,0.0280728822587374,0.99796454349377,2,11,regulation of NLRP3 inflammasome complex assembly,BP,cell_exon_vs_cell_inex_goseq
GO:0071639,0.0281055855095241,0.99799418580285,2,10,positive regulation of monocyte chemotactic protein-1 production,BP,cell_exon_vs_cell_inex_goseq
GO:0035196,0.0282551430384505,0.995789517456713,3,41,production of miRNAs involved in gene silencing by miRNA,BP,cell_exon_vs_cell_inex_goseq
GO:0051130,0.0285524689394897,0.984341193591962,20,717,positive regulation of cellular component organization,BP,cell_exon_vs_cell_inex_goseq
GO:0045947,0.0286838733955091,0.997777581931673,2,17,negative regulation of translational initiation,BP,cell_exon_vs_cell_inex_goseq
GO:0030855,0.0287698406277189,0.987540291521258,11,295,epithelial cell differentiation,BP,cell_exon_vs_cell_inex_goseq
GO:0031090,0.0287796485041628,0.979545519407744,65,2530,organelle membrane,CC,cell_exon_vs_cell_inex_goseq
GO:0035497,0.0287814613497793,0.997856459441998,2,12,cAMP response element binding,MF,cell_exon_vs_cell_inex_goseq
GO:0006913,0.0287973473255171,0.988745234078813,9,240,nucleocytoplasmic transport,BP,cell_exon_vs_cell_inex_goseq
GO:0051169,0.0287973473255171,0.988745234078813,9,240,nuclear transport,BP,cell_exon_vs_cell_inex_goseq
GO:0034164,0.0288159243172374,0.999790063845003,1,2,negative regulation of toll-like receptor 9 signaling pathway,BP,cell_exon_vs_cell_inex_goseq
GO:0099173,0.0288410236284101,0.992479459141814,5,115,postsynapse organization,BP,cell_exon_vs_cell_inex_goseq
GO:0019083,0.0289088655073941,0.994029928769752,4,43,viral transcription,BP,cell_exon_vs_cell_inex_goseq
GO:0002429,0.0289701891357263,0.990278111242652,7,160,immune response-activating cell surface receptor signaling pathway,BP,cell_exon_vs_cell_inex_goseq
GO:0002757,0.0289701891357263,0.990278111242652,7,160,immune response-activating signal transduction,BP,cell_exon_vs_cell_inex_goseq
GO:0120015,0.0291394974245104,0.997790926221082,2,13,sterol transfer activity,MF,cell_exon_vs_cell_inex_goseq
GO:0060669,0.0291909679612921,0.997764122781875,2,14,embryonic placenta morphogenesis,BP,cell_exon_vs_cell_inex_goseq
GO:0071426,0.0292106642970245,0.993842751656755,4,64,ribonucleoprotein complex export from nucleus,BP,cell_exon_vs_cell_inex_goseq
GO:0061134,0.0292192571119257,0.991242099175219,6,99,peptidase regulator activity,MF,cell_exon_vs_cell_inex_goseq
GO:0001738,0.0292846990115153,0.995526208526559,3,54,morphogenesis of a polarized epithelium,BP,cell_exon_vs_cell_inex_goseq
GO:0140632,0.0292891924801936,0.99779798850165,2,12,inflammasome complex assembly,BP,cell_exon_vs_cell_inex_goseq
GO:0043273,0.0295199938679456,0.999706623570879,1,3,CTPase activity,MF,cell_exon_vs_cell_inex_goseq
GO:1902570,0.0295671228293469,0.997740842470356,2,13,protein localization to nucleolus,BP,cell_exon_vs_cell_inex_goseq
GO:0046164,0.0296091516218133,0.995551259421607,3,34,alcohol catabolic process,BP,cell_exon_vs_cell_inex_goseq
GO:0051254,0.0296734581902353,0.981434180336099,32,1145,positive regulation of RNA metabolic process,BP,cell_exon_vs_cell_inex_goseq
GO:1905576,0.0298936277430244,0.999773942212978,1,2,ganglioside GT1b binding,MF,cell_exon_vs_cell_inex_goseq
GO:0046031,0.0300108886962921,0.993624701879115,4,63,ADP metabolic process,BP,cell_exon_vs_cell_inex_goseq
GO:0000405,0.0300267393808052,0.999636167970622,1,5,bubble DNA binding,MF,cell_exon_vs_cell_inex_goseq
GO:0003714,0.0301411547351616,0.989818455396823,7,147,transcription corepressor activity,MF,cell_exon_vs_cell_inex_goseq
GO:1900272,0.0302379818431758,0.997717896492357,2,11,negative regulation of long-term synaptic potentiation,BP,cell_exon_vs_cell_inex_goseq
GO:1903038,0.0302528117020069,0.992086804057519,5,80,negative regulation of leukocyte cell-cell adhesion,BP,cell_exon_vs_cell_inex_goseq
GO:0001959,0.0303708986975161,0.990810444743302,6,101,regulation of cytokine-mediated signaling pathway,BP,cell_exon_vs_cell_inex_goseq
GO:0043392,0.0304350265315407,0.99538651359743,3,33,negative regulation of DNA binding,BP,cell_exon_vs_cell_inex_goseq
GO:0045131,0.030476373429821,1,1,1,pre-mRNA branch point binding,MF,cell_exon_vs_cell_inex_goseq
GO:0061081,0.030565106525743,0.997536484301854,2,18,positive regulation of myeloid leukocyte cytokine production involved in immune response,BP,cell_exon_vs_cell_inex_goseq
GO:0060633,0.0306306165371152,0.999644777502011,1,4,negative regulation of transcription initiation from RNA polymerase II promoter,BP,cell_exon_vs_cell_inex_goseq
GO:0004356,0.0306368371537773,1,1,1,glutamate-ammonia ligase activity,MF,cell_exon_vs_cell_inex_goseq
GO:0006542,0.0306368371537773,1,1,1,glutamine biosynthetic process,BP,cell_exon_vs_cell_inex_goseq
GO:0016211,0.0306368371537773,1,1,1,ammonia ligase activity,MF,cell_exon_vs_cell_inex_goseq
GO:0019676,0.0306368371537773,1,1,1,ammonia assimilation cycle,BP,cell_exon_vs_cell_inex_goseq
GO:0007549,0.0306712716816597,0.997536383562857,2,17,dosage compensation,BP,cell_exon_vs_cell_inex_goseq
GO:0051726,0.0307739081932876,0.982501058879951,22,697,regulation of cell cycle,BP,cell_exon_vs_cell_inex_goseq
GO:0031401,0.0308141881100162,0.983540976803828,18,617,positive regulation of protein modification process,BP,cell_exon_vs_cell_inex_goseq
GO:1905663,0.030822995534803,0.999759553131178,1,2,positive regulation of telomerase RNA reverse transcriptase activity,BP,cell_exon_vs_cell_inex_goseq
GO:0031362,0.0309636670634521,0.99796717015328,2,6,anchored component of external side of plasma membrane,CC,cell_exon_vs_cell_inex_goseq
GO:1901652,0.0309954787947252,0.986409771949961,11,317,response to peptide,BP,cell_exon_vs_cell_inex_goseq
GO:0045598,0.0310944096528933,0.99180788274644,5,80,regulation of fat cell differentiation,BP,cell_exon_vs_cell_inex_goseq
GO:1902895,0.0310982824551761,0.99526485354534,3,31,positive regulation of pri-miRNA transcription by RNA polymerase II,BP,cell_exon_vs_cell_inex_goseq
GO:0120220,0.0311604915821111,1,1,1,basal body patch,CC,cell_exon_vs_cell_inex_goseq
GO:0050918,0.031333866735226,0.995247858336694,3,28,positive chemotaxis,BP,cell_exon_vs_cell_inex_goseq
GO:0071166,0.0313452446771678,0.993243926666545,4,65,ribonucleoprotein complex localization,BP,cell_exon_vs_cell_inex_goseq
GO:0050852,0.031437027996313,0.991662605966696,5,91,T cell receptor signaling pathway,BP,cell_exon_vs_cell_inex_goseq
GO:0060964,0.0315419650786341,0.9951284023286,3,36,regulation of gene silencing by miRNA,BP,cell_exon_vs_cell_inex_goseq
GO:0005938,0.031752579341068,0.989087384532259,7,219,cell cortex,CC,cell_exon_vs_cell_inex_goseq
GO:1903900,0.0318338175294849,0.990243200005878,6,109,regulation of viral life cycle,BP,cell_exon_vs_cell_inex_goseq
GO:0046174,0.0318588791497789,0.997331707692879,2,22,polyol catabolic process,BP,cell_exon_vs_cell_inex_goseq
GO:0010522,0.0318857843623971,0.994992799516128,3,47,regulation of calcium ion transport into cytosol,BP,cell_exon_vs_cell_inex_goseq
GO:0007596,0.0319263430249785,0.990184166386148,6,121,blood coagulation,BP,cell_exon_vs_cell_inex_goseq
GO:0033194,0.0319555185240414,0.997429942138333,2,14,response to hydroperoxide,BP,cell_exon_vs_cell_inex_goseq
GO:0001676,0.0320979034564139,0.993059250448629,4,58,long-chain fatty acid metabolic process,BP,cell_exon_vs_cell_inex_goseq
GO:0045089,0.0322700231957501,0.991393339492061,5,87,positive regulation of innate immune response,BP,cell_exon_vs_cell_inex_goseq
GO:0043266,0.0322796358937828,0.994902629535927,3,48,regulation of potassium ion transport,BP,cell_exon_vs_cell_inex_goseq
GO:2000370,0.0323047684091513,0.999578474562474,1,5,positive regulation of clathrin-dependent endocytosis,BP,cell_exon_vs_cell_inex_goseq
GO:0044794,0.0323156621435548,0.9974378825575,2,12,positive regulation by host of viral process,BP,cell_exon_vs_cell_inex_goseq
GO:0050817,0.0323191256226564,0.990033434262313,6,122,coagulation,BP,cell_exon_vs_cell_inex_goseq
GO:0001101,0.0325813179504297,0.991294118366622,5,85,response to acid chemical,BP,cell_exon_vs_cell_inex_goseq
GO:0016880,0.032745426229232,0.999728356178569,1,2,acid-ammonia (or amide) ligase activity,MF,cell_exon_vs_cell_inex_goseq
GO:0009746,0.0327636320597076,0.98876244535491,7,133,response to hexose,BP,cell_exon_vs_cell_inex_goseq
GO:0031663,0.0328899326704327,0.99287803463374,4,50,lipopolysaccharide-mediated signaling pathway,BP,cell_exon_vs_cell_inex_goseq
GO:0030301,0.032898416248311,0.992802157729604,4,65,cholesterol transport,BP,cell_exon_vs_cell_inex_goseq
GO:0047485,0.0329059917740145,0.991178469263793,5,87,protein N-terminus binding,MF,cell_exon_vs_cell_inex_goseq
GO:0007599,0.0329297817568807,0.989799160696211,6,123,hemostasis,BP,cell_exon_vs_cell_inex_goseq
GO:0006713,0.0330324652104133,1,1,1,glucocorticoid catabolic process,BP,cell_exon_vs_cell_inex_goseq
GO:0033002,0.0330843968829707,0.98974764309841,6,119,muscle cell proliferation,BP,cell_exon_vs_cell_inex_goseq
GO:1902423,0.0331430297590458,0.999721662465331,1,2,regulation of attachment of mitotic spindle microtubules to kinetochore,BP,cell_exon_vs_cell_inex_goseq
GO:1902425,0.0331430297590458,0.999721662465331,1,2,positive regulation of attachment of mitotic spindle microtubules to kinetochore,BP,cell_exon_vs_cell_inex_goseq
GO:0071479,0.0331690153717275,0.992744978291903,4,60,cellular response to ionizing radiation,BP,cell_exon_vs_cell_inex_goseq
GO:0070482,0.0332554954140152,0.986695124791595,9,211,response to oxygen levels,BP,cell_exon_vs_cell_inex_goseq
GO:0008216,0.0334636293747837,0.997707743941478,2,6,spermidine metabolic process,BP,cell_exon_vs_cell_inex_goseq
GO:0035693,0.0335050963334238,1,1,1,NOS2-CD74 complex,CC,cell_exon_vs_cell_inex_goseq
GO:0042658,0.0335050963334238,1,1,1,"MHC class II protein binding, via antigen binding groove",MF,cell_exon_vs_cell_inex_goseq
GO:1903975,0.0335149262901369,0.997289810576185,2,12,regulation of glial cell migration,BP,cell_exon_vs_cell_inex_goseq
GO:0031233,0.0335530340081571,0.997575854105334,2,7,intrinsic component of external side of plasma membrane,CC,cell_exon_vs_cell_inex_goseq
GO:0043124,0.0335619091736638,0.994682729745214,3,37,negative regulation of I-kappaB kinase/NF-kappaB signaling,BP,cell_exon_vs_cell_inex_goseq
GO:0035821,0.0336280238993175,0.990986747511743,5,72,modulation of process of other organism,BP,cell_exon_vs_cell_inex_goseq
GO:0030003,0.0336346564476733,0.984478502678308,12,330,cellular cation homeostasis,BP,cell_exon_vs_cell_inex_goseq
GO:1902523,0.0336693634391225,0.999617629032523,1,3,positive regulation of protein K63-linked ubiquitination,BP,cell_exon_vs_cell_inex_goseq
GO:1905907,0.0338304125854926,0.997330711757832,2,10,negative regulation of amyloid fibril formation,BP,cell_exon_vs_cell_inex_goseq
GO:1905897,0.0338357119414006,0.990925299276297,5,70,regulation of response to endoplasmic reticulum stress,BP,cell_exon_vs_cell_inex_goseq
GO:0021762,0.0339870669561335,0.994613919312007,3,34,substantia nigra development,BP,cell_exon_vs_cell_inex_goseq
GO:0031406,0.0340364312593814,0.990799774641881,5,85,carboxylic acid binding,MF,cell_exon_vs_cell_inex_goseq
GO:0060265,0.034047550919446,1,1,1,positive regulation of respiratory burst involved in inflammatory response,BP,cell_exon_vs_cell_inex_goseq
GO:0045010,0.0340629814278498,0.994544795009973,3,41,actin nucleation,BP,cell_exon_vs_cell_inex_goseq
GO:1902914,0.0340704196829351,0.997062335409904,2,20,regulation of protein polyubiquitination,BP,cell_exon_vs_cell_inex_goseq
GO:0009409,0.0341019284277379,0.994608001757697,3,32,response to cold,BP,cell_exon_vs_cell_inex_goseq
GO:2000096,0.0341466195981141,0.999509232785938,1,6,"positive regulation of Wnt signaling pathway, planar cell polarity pathway",BP,cell_exon_vs_cell_inex_goseq
GO:0035994,0.0342394249757041,0.997118637617,2,15,response to muscle stretch,BP,cell_exon_vs_cell_inex_goseq
GO:1902544,0.0342718787654329,0.999702206284479,1,2,regulation of DNA N-glycosylase activity,BP,cell_exon_vs_cell_inex_goseq
GO:0030295,0.0343461140891817,0.992369356754671,4,69,protein kinase activator activity,MF,cell_exon_vs_cell_inex_goseq
GO:0060537,0.0344471182116574,0.986996692615254,8,195,muscle tissue development,BP,cell_exon_vs_cell_inex_goseq
GO:0010825,0.0344867196993139,0.999548965811032,1,4,positive regulation of centrosome duplication,BP,cell_exon_vs_cell_inex_goseq
GO:0019216,0.0344964437789351,0.986973452959636,8,196,regulation of lipid metabolic process,BP,cell_exon_vs_cell_inex_goseq
GO:2000143,0.0345796583584696,0.999516565132082,1,5,"negative regulation of DNA-templated transcription, initiation",BP,cell_exon_vs_cell_inex_goseq
GO:0090725,0.0346321545981742,0.999695855962255,1,2,peripheral region of growth cone,CC,cell_exon_vs_cell_inex_goseq
GO:0031640,0.0346370062520669,0.99472646151032,3,19,killing of cells of other organism,BP,cell_exon_vs_cell_inex_goseq
GO:1902235,0.0347200733000708,0.994520323166273,3,28,regulation of endoplasmic reticulum stress-induced intrinsic apoptotic signaling pathway,BP,cell_exon_vs_cell_inex_goseq
GO:0055072,0.0348450468603349,0.992292205582716,4,54,iron ion homeostasis,BP,cell_exon_vs_cell_inex_goseq
GO:0045616,0.0348583706610676,0.99701755395572,2,16,regulation of keratinocyte differentiation,BP,cell_exon_vs_cell_inex_goseq
GO:0071896,0.0349711061269591,0.999536110439951,1,4,protein localization to adherens junction,BP,cell_exon_vs_cell_inex_goseq
GO:0035924,0.0352178502101519,0.994341188759917,3,34,cellular response to vascular endothelial growth factor stimulus,BP,cell_exon_vs_cell_inex_goseq
GO:2000622,0.035257477870665,0.999528424027134,1,4,"regulation of nuclear-transcribed mRNA catabolic process, nonsense-mediated decay",BP,cell_exon_vs_cell_inex_goseq
GO:2000623,0.035257477870665,0.999528424027134,1,4,"negative regulation of nuclear-transcribed mRNA catabolic process, nonsense-mediated decay",BP,cell_exon_vs_cell_inex_goseq
GO:0043370,0.0354111659639031,0.994279967378123,3,36,"regulation of CD4-positive, alpha-beta T cell differentiation",BP,cell_exon_vs_cell_inex_goseq
GO:0045914,0.0354292750699307,0.999523782102523,1,4,negative regulation of catecholamine metabolic process,BP,cell_exon_vs_cell_inex_goseq
GO:0045963,0.0354292750699307,0.999523782102523,1,4,negative regulation of dopamine metabolic process,BP,cell_exon_vs_cell_inex_goseq
GO:0060142,0.035516866694364,0.996951179108427,2,15,regulation of syncytium formation by plasma membrane fusion,BP,cell_exon_vs_cell_inex_goseq
GO:0045121,0.0355309398470267,0.986486114197039,8,217,membrane raft,CC,cell_exon_vs_cell_inex_goseq
GO:0098857,0.0355309398470267,0.986486114197039,8,217,membrane microdomain,CC,cell_exon_vs_cell_inex_goseq
GO:0002218,0.0357256853715152,0.994165256665497,3,42,activation of innate immune response,BP,cell_exon_vs_cell_inex_goseq
GO:0050902,0.0357741986453803,1,1,1,leukocyte adhesive activation,BP,cell_exon_vs_cell_inex_goseq
GO:0006875,0.0358669913961242,0.983932018930857,11,286,cellular metal ion homeostasis,BP,cell_exon_vs_cell_inex_goseq
GO:0043028,0.0358937842158487,0.994247145513334,3,29,cysteine-type endopeptidase regulator activity involved in apoptotic process,MF,cell_exon_vs_cell_inex_goseq
GO:0006919,0.0358993456584948,0.991962034885579,4,58,activation of cysteine-type endopeptidase activity involved in apoptotic process,BP,cell_exon_vs_cell_inex_goseq
GO:0043112,0.0360457129061691,0.990039159781493,5,112,receptor metabolic process,BP,cell_exon_vs_cell_inex_goseq
GO:0043536,0.0360938447519736,0.994109716591684,3,38,positive regulation of blood vessel endothelial cell migration,BP,cell_exon_vs_cell_inex_goseq
GO:0097208,0.0361660681813868,0.999558313865975,1,3,alveolar lamellar body,CC,cell_exon_vs_cell_inex_goseq
GO:0043535,0.036258899677265,0.991831724197351,4,63,regulation of blood vessel endothelial cell migration,BP,cell_exon_vs_cell_inex_goseq
GO:0010711,0.036390946499819,1,1,1,negative regulation of collagen catabolic process,BP,cell_exon_vs_cell_inex_goseq
GO:0060310,0.036390946499819,1,1,1,regulation of elastin catabolic process,BP,cell_exon_vs_cell_inex_goseq
GO:0060311,0.036390946499819,1,1,1,negative regulation of elastin catabolic process,BP,cell_exon_vs_cell_inex_goseq
GO:0060313,0.036390946499819,1,1,1,negative regulation of blood vessel remodeling,BP,cell_exon_vs_cell_inex_goseq
GO:0045116,0.0364232845163345,0.99688430701365,2,13,protein neddylation,BP,cell_exon_vs_cell_inex_goseq
GO:0090713,0.0366784232435627,0.996884985229393,2,12,immunological memory process,BP,cell_exon_vs_cell_inex_goseq
GO:2000819,0.036774281555727,0.99945276064221,1,5,regulation of nucleotide-excision repair,BP,cell_exon_vs_cell_inex_goseq
GO:2001237,0.0368287780585613,0.991658273333561,4,64,negative regulation of extrinsic apoptotic signaling pathway,BP,cell_exon_vs_cell_inex_goseq
GO:0062061,0.037088146193527,0.999650746747574,1,2,TAP complex binding,MF,cell_exon_vs_cell_inex_goseq
GO:0034109,0.0371159063455325,0.991591926049966,4,60,homotypic cell-cell adhesion,BP,cell_exon_vs_cell_inex_goseq
GO:1905906,0.0371300553903091,0.996790454468246,2,13,regulation of amyloid fibril formation,BP,cell_exon_vs_cell_inex_goseq
GO:0031503,0.0371433526888534,0.98810075080427,6,166,protein-containing complex localization,BP,cell_exon_vs_cell_inex_goseq
GO:0032532,0.0371816260456861,0.999532942902084,1,3,regulation of microvillus length,BP,cell_exon_vs_cell_inex_goseq
GO:0008331,0.037200774841475,0.999416803605047,1,6,high voltage-gated calcium channel activity,MF,cell_exon_vs_cell_inex_goseq
GO:0045860,0.0373134763250735,0.984729915020088,9,245,positive regulation of protein kinase activity,BP,cell_exon_vs_cell_inex_goseq
GO:0016234,0.0373904473425436,0.991510151179021,4,60,inclusion body,CC,cell_exon_vs_cell_inex_goseq
GO:0007162,0.037432874875776,0.986726693817105,7,176,negative regulation of cell adhesion,BP,cell_exon_vs_cell_inex_goseq
GO:0045819,0.0374337240715727,0.999644144453673,1,2,positive regulation of glycogen catabolic process,BP,cell_exon_vs_cell_inex_goseq
GO:0051238,0.0374382349706985,0.997022280549832,2,8,sequestering of metal ion,BP,cell_exon_vs_cell_inex_goseq
GO:0072593,0.037625431548209,0.986703525445487,7,138,reactive oxygen species metabolic process,BP,cell_exon_vs_cell_inex_goseq
GO:0042311,0.0376484948401916,0.993919703275157,3,25,vasodilation,BP,cell_exon_vs_cell_inex_goseq
GO:1905517,0.0376609101099073,0.993849514427481,3,29,macrophage migration,BP,cell_exon_vs_cell_inex_goseq
GO:1905172,0.0376676708051451,0.999461189611649,1,4,RISC complex binding,MF,cell_exon_vs_cell_inex_goseq
GO:0032055,0.0377109398633692,0.999519433712882,1,3,negative regulation of translation in response to stress,BP,cell_exon_vs_cell_inex_goseq
GO:0051252,0.0377594035344966,0.973080529466263,59,2383,regulation of RNA metabolic process,BP,cell_exon_vs_cell_inex_goseq
GO:0030100,0.0378505735811464,0.987840913387313,6,150,regulation of endocytosis,BP,cell_exon_vs_cell_inex_goseq
GO:1990428,0.0379340789955308,0.999513680024456,1,3,miRNA transport,BP,cell_exon_vs_cell_inex_goseq
GO:0017134,0.0379388739319367,0.996761229435532,2,11,fibroblast growth factor binding,MF,cell_exon_vs_cell_inex_goseq
GO:0060765,0.0379434571074761,0.996486492898238,2,24,regulation of androgen receptor signaling pathway,BP,cell_exon_vs_cell_inex_goseq
GO:0070431,0.0381392057293191,0.996734750518298,2,11,nucleotide-binding oligomerization domain containing 2 signaling pathway,BP,cell_exon_vs_cell_inex_goseq
GO:0034399,0.0381533982942825,0.989300404615875,5,110,nuclear periphery,CC,cell_exon_vs_cell_inex_goseq
GO:0007204,0.0383325523602472,0.987669910098123,6,137,positive regulation of cytosolic calcium ion concentration,BP,cell_exon_vs_cell_inex_goseq
GO:0060249,0.0383531137024719,0.986345105374789,7,165,anatomical structure homeostasis,BP,cell_exon_vs_cell_inex_goseq
GO:0001726,0.0384789774561038,0.989133281333506,5,141,ruffle,CC,cell_exon_vs_cell_inex_goseq
GO:0051767,0.0385879739382961,0.99659368020819,2,13,nitric-oxide synthase biosynthetic process,BP,cell_exon_vs_cell_inex_goseq
GO:0051769,0.0385879739382961,0.99659368020819,2,13,regulation of nitric-oxide synthase biosynthetic process,BP,cell_exon_vs_cell_inex_goseq
GO:0070059,0.0387850420883691,0.991141771777461,4,52,intrinsic apoptotic signaling pathway in response to endoplasmic reticulum stress,BP,cell_exon_vs_cell_inex_goseq
GO:0007253,0.0389097525773883,0.99683908944476,2,8,cytoplasmic sequestering of NF-kappaB,BP,cell_exon_vs_cell_inex_goseq
GO:1903363,0.0389245496963838,0.99107285217729,4,56,negative regulation of cellular protein catabolic process,BP,cell_exon_vs_cell_inex_goseq
GO:0070647,0.0389419267441232,0.977294405160404,22,768,protein modification by small protein conjugation or removal,BP,cell_exon_vs_cell_inex_goseq
GO:2000543,0.039068814639052,0.99961205073495,1,2,positive regulation of gastrulation,BP,cell_exon_vs_cell_inex_goseq
GO:0032729,0.0392963490403874,0.99100325864741,4,50,positive regulation of interferon-gamma production,BP,cell_exon_vs_cell_inex_goseq
GO:0015918,0.0393477871539487,0.990859346153675,4,74,sterol transport,BP,cell_exon_vs_cell_inex_goseq
GO:0032393,0.0395266500970408,0.996604874622152,2,10,MHC class I receptor activity,MF,cell_exon_vs_cell_inex_goseq
GO:0035692,0.0396353984982038,0.999600599935592,1,2,macrophage migration inhibitory factor receptor complex,CC,cell_exon_vs_cell_inex_goseq
GO:0044257,0.0396784762523241,0.977460200356617,20,651,cellular protein catabolic process,BP,cell_exon_vs_cell_inex_goseq
GO:0045596,0.0397257234615251,0.980590644336362,13,343,negative regulation of cell differentiation,BP,cell_exon_vs_cell_inex_goseq
GO:0032481,0.0398357180171358,0.99081043203065,4,54,positive regulation of type I interferon production,BP,cell_exon_vs_cell_inex_goseq
GO:0010563,0.0398841492269973,0.981818328680158,11,302,negative regulation of phosphorus metabolic process,BP,cell_exon_vs_cell_inex_goseq
GO:0045936,0.0398841492269973,0.981818328680158,11,302,negative regulation of phosphate metabolic process,BP,cell_exon_vs_cell_inex_goseq
GO:0035711,0.0400216130095108,0.999592697014361,1,2,T-helper 1 cell activation,BP,cell_exon_vs_cell_inex_goseq
GO:1990440,0.0400357287616061,0.996607141619278,2,9,positive regulation of transcription from RNA polymerase II promoter in response to endoplasmic reticulum stress,BP,cell_exon_vs_cell_inex_goseq
GO:0060600,0.040078484210252,0.999349116275699,1,5,dichotomous subdivision of an epithelial terminal unit,BP,cell_exon_vs_cell_inex_goseq
GO:0070633,0.0401513484561079,0.996248502992667,2,18,transepithelial transport,BP,cell_exon_vs_cell_inex_goseq
GO:0048102,0.0403285870152235,0.996497650819453,2,10,autophagic cell death,BP,cell_exon_vs_cell_inex_goseq
GO:0050810,0.040401266896537,0.993150508074043,3,34,regulation of steroid biosynthetic process,BP,cell_exon_vs_cell_inex_goseq
GO:0043022,0.0404564382499591,0.990583549464844,4,60,ribosome binding,MF,cell_exon_vs_cell_inex_goseq
GO:0071813,0.0405094815466497,0.996163074626717,2,20,lipoprotein particle binding,MF,cell_exon_vs_cell_inex_goseq
GO:0071814,0.0405094815466497,0.996163074626717,2,20,protein-lipid complex binding,MF,cell_exon_vs_cell_inex_goseq
GO:0051603,0.0406753347943403,0.977188711857012,19,609,proteolysis involved in cellular protein catabolic process,BP,cell_exon_vs_cell_inex_goseq
GO:0019747,0.0407454963759414,0.999438198752745,1,3,regulation of isoprenoid metabolic process,BP,cell_exon_vs_cell_inex_goseq
GO:1901381,0.0407517784415241,0.996113095457991,2,21,positive regulation of potassium ion transmembrane transport,BP,cell_exon_vs_cell_inex_goseq
GO:0101023,0.0411666418970095,0.996121243279146,2,17,vascular endothelial cell proliferation,BP,cell_exon_vs_cell_inex_goseq
GO:1905562,0.0411666418970095,0.996121243279146,2,17,regulation of vascular endothelial cell proliferation,BP,cell_exon_vs_cell_inex_goseq
GO:0032816,0.0412842261821576,0.996218670847357,2,13,positive regulation of natural killer cell activation,BP,cell_exon_vs_cell_inex_goseq
GO:0016052,0.0413214755918274,0.988174299335098,5,105,carbohydrate catabolic process,BP,cell_exon_vs_cell_inex_goseq
GO:0016829,0.0414309535593983,0.9864408099459,6,130,lyase activity,MF,cell_exon_vs_cell_inex_goseq
GO:0035500,0.0415648521497212,1,1,1,MH2 domain binding,MF,cell_exon_vs_cell_inex_goseq
GO:0002726,0.0416601790969534,0.996049111588313,2,17,positive regulation of T cell cytokine production,BP,cell_exon_vs_cell_inex_goseq
GO:0034165,0.0417988308846503,0.999291535903983,1,5,positive regulation of toll-like receptor 9 signaling pathway,BP,cell_exon_vs_cell_inex_goseq
GO:0051899,0.0418224010486962,0.992743755884879,3,41,membrane depolarization,BP,cell_exon_vs_cell_inex_goseq
GO:0034349,0.0419651948956629,0.996004290928878,2,17,glial cell apoptotic process,BP,cell_exon_vs_cell_inex_goseq
GO:0008630,0.0420030941499427,0.988021565760535,5,78,intrinsic apoptotic signaling pathway in response to DNA damage,BP,cell_exon_vs_cell_inex_goseq
GO:1901654,0.0421575835794185,0.986174404749633,6,118,response to ketone,BP,cell_exon_vs_cell_inex_goseq
GO:1901616,0.0422146650918688,0.992666062767969,3,39,organic hydroxy compound catabolic process,BP,cell_exon_vs_cell_inex_goseq
GO:0008236,0.042216572225339,0.990066539722434,4,56,serine-type peptidase activity,MF,cell_exon_vs_cell_inex_goseq
GO:0010951,0.0424194615772617,0.986090635391939,6,110,negative regulation of endopeptidase activity,BP,cell_exon_vs_cell_inex_goseq
GO:0052126,0.0425820255023898,0.985986931483656,6,124,movement in host environment,BP,cell_exon_vs_cell_inex_goseq
GO:0043470,0.0426259650281507,0.992557331541788,3,40,regulation of carbohydrate catabolic process,BP,cell_exon_vs_cell_inex_goseq
GO:0060759,0.0427874897835373,0.985944219913063,6,109,regulation of response to cytokine stimulus,BP,cell_exon_vs_cell_inex_goseq
GO:0009790,0.0428211744987581,0.977122001405701,16,573,embryo development,BP,cell_exon_vs_cell_inex_goseq
GO:0031050,0.0428253396187983,0.992484264179582,3,43,dsRNA processing,BP,cell_exon_vs_cell_inex_goseq
GO:0070918,0.0428253396187983,0.992484264179582,3,43,production of small RNA involved in gene silencing by RNA,BP,cell_exon_vs_cell_inex_goseq
GO:2001270,0.0428923297479357,0.999299780387329,1,4,regulation of cysteine-type endopeptidase activity involved in execution phase of apoptosis,BP,cell_exon_vs_cell_inex_goseq
GO:0072503,0.0430759619321848,0.981922584648416,9,232,cellular divalent inorganic cation homeostasis,BP,cell_exon_vs_cell_inex_goseq
GO:0002526,0.0434014528929582,0.989705023750337,4,55,acute inflammatory response,BP,cell_exon_vs_cell_inex_goseq
GO:0006450,0.0435915866502457,0.995787248786666,2,16,regulation of translational fidelity,BP,cell_exon_vs_cell_inex_goseq
GO:0017171,0.0435986589065135,0.989622145829017,4,58,serine hydrolase activity,MF,cell_exon_vs_cell_inex_goseq
GO:0045582,0.0436830436826665,0.989582721987459,4,60,positive regulation of T cell differentiation,BP,cell_exon_vs_cell_inex_goseq
GO:0071705,0.0437807522736645,0.97097830901639,36,1450,nitrogen compound transport,BP,cell_exon_vs_cell_inex_goseq
GO:0051450,0.0437949503531054,0.995856772427142,2,13,myoblast proliferation,BP,cell_exon_vs_cell_inex_goseq
GO:0035718,0.0438113392927046,0.999510949121776,1,2,macrophage migration inhibitory factor binding,MF,cell_exon_vs_cell_inex_goseq
GO:0042177,0.0438516056680214,0.987307583976497,5,87,negative regulation of protein catabolic process,BP,cell_exon_vs_cell_inex_goseq
GO:0150078,0.0439329516469023,0.996081597625756,2,9,positive regulation of neuroinflammatory response,BP,cell_exon_vs_cell_inex_goseq
GO:0006165,0.0440987520833752,0.989417494208163,4,66,nucleoside diphosphate phosphorylation,BP,cell_exon_vs_cell_inex_goseq
GO:1990630,0.0441411165870909,0.999503474082833,1,2,IRE1-RACK1-PP2A complex,CC,cell_exon_vs_cell_inex_goseq
GO:0033293,0.0442831979133641,0.992229471815644,3,33,monocarboxylic acid binding,MF,cell_exon_vs_cell_inex_goseq
GO:0072567,0.0443847253863406,0.995697297041998,2,15,chemokine (C-X-C motif) ligand 2 production,BP,cell_exon_vs_cell_inex_goseq
GO:2000341,0.0443847253863406,0.995697297041998,2,15,regulation of chemokine (C-X-C motif) ligand 2 production,BP,cell_exon_vs_cell_inex_goseq
GO:0072345,0.0444644279313037,0.999496089298782,1,2,NAADP-sensitive calcium-release channel activity,MF,cell_exon_vs_cell_inex_goseq
GO:0097682,0.0444644279313037,0.999496089298782,1,2,"intracellular phosphatidylinositol-3,5-bisphosphate-sensitive cation channel activity",MF,cell_exon_vs_cell_inex_goseq
GO:0038024,0.0446582216016818,0.991996330795822,3,48,cargo receptor activity,MF,cell_exon_vs_cell_inex_goseq
GO:0033559,0.0448057274824132,0.989263811225111,4,55,unsaturated fatty acid metabolic process,BP,cell_exon_vs_cell_inex_goseq
GO:1903892,0.0448514660270097,0.999487175568987,1,2,negative regulation of ATF6-mediated unfolded protein response,BP,cell_exon_vs_cell_inex_goseq
GO:0034976,0.0448982015967126,0.981040961097023,9,211,response to endoplasmic reticulum stress,BP,cell_exon_vs_cell_inex_goseq
GO:0007249,0.0449066808703826,0.981027557153191,9,218,I-kappaB kinase/NF-kappaB signaling,BP,cell_exon_vs_cell_inex_goseq
GO:1900221,0.0449509685258964,0.9957328797437,2,12,regulation of amyloid-beta clearance,BP,cell_exon_vs_cell_inex_goseq
GO:0060147,0.0450420118522789,0.991972362866605,3,39,regulation of posttranscriptional gene silencing,BP,cell_exon_vs_cell_inex_goseq
GO:0008198,0.045284250032902,0.995531289235389,2,16,ferrous iron binding,MF,cell_exon_vs_cell_inex_goseq
GO:2000377,0.0452856822879405,0.986733915520266,5,99,regulation of reactive oxygen species metabolic process,BP,cell_exon_vs_cell_inex_goseq
GO:0034157,0.04572807154972,0.999203157679668,1,4,positive regulation of toll-like receptor 7 signaling pathway,BP,cell_exon_vs_cell_inex_goseq
GO:0019080,0.0457334995172379,0.986629139319401,5,83,viral gene expression,BP,cell_exon_vs_cell_inex_goseq
GO:2000637,0.0457395750316391,0.995337618712113,2,22,positive regulation of gene silencing by miRNA,BP,cell_exon_vs_cell_inex_goseq
GO:0003342,0.0457500997899842,1,1,1,proepicardium development,BP,cell_exon_vs_cell_inex_goseq
GO:0003343,0.0457500997899842,1,1,1,septum transversum development,BP,cell_exon_vs_cell_inex_goseq
GO:0097403,0.0457500997899842,1,1,1,cellular response to raffinose,BP,cell_exon_vs_cell_inex_goseq
GO:1901545,0.0457500997899842,1,1,1,response to raffinose,BP,cell_exon_vs_cell_inex_goseq
GO:0034755,0.0458378608293495,0.995512453846589,2,14,iron ion transmembrane transport,BP,cell_exon_vs_cell_inex_goseq
GO:0032727,0.0460461559392976,0.995341542745742,2,19,positive regulation of interferon-alpha production,BP,cell_exon_vs_cell_inex_goseq
GO:0051128,0.0460576718608445,0.96933679359042,36,1507,regulation of cellular component organization,BP,cell_exon_vs_cell_inex_goseq
GO:0007267,0.0461862076294939,0.972912049176586,21,802,cell-cell signaling,BP,cell_exon_vs_cell_inex_goseq
GO:0055037,0.0462144038633058,0.984439662882103,6,148,recycling endosome,CC,cell_exon_vs_cell_inex_goseq
GO:0043268,0.0462455025139714,0.995217751870378,2,25,positive regulation of potassium ion transport,BP,cell_exon_vs_cell_inex_goseq
GO:0001558,0.0463983712728752,0.979237404722941,10,266,regulation of cell growth,BP,cell_exon_vs_cell_inex_goseq
GO:0006090,0.0465900967926941,0.988587380419418,4,73,pyruvate metabolic process,BP,cell_exon_vs_cell_inex_goseq
GO:0001890,0.0469155840309236,0.98618333454135,5,84,placenta development,BP,cell_exon_vs_cell_inex_goseq
GO:0002842,0.0469558859690868,0.999159346119841,1,4,positive regulation of T cell mediated immune response to tumor cell,BP,cell_exon_vs_cell_inex_goseq
GO:0046632,0.0470131118962739,0.988446033624658,4,74,alpha-beta T cell differentiation,BP,cell_exon_vs_cell_inex_goseq
GO:0042093,0.0470477891695674,0.991431094323011,3,43,T-helper cell differentiation,BP,cell_exon_vs_cell_inex_goseq
GO:0034620,0.0472361054685957,0.986077835161739,5,81,cellular response to unfolded protein,BP,cell_exon_vs_cell_inex_goseq
GO:0036493,0.04735705967366,0.999088494727717,1,5,positive regulation of translation in response to endoplasmic reticulum stress,BP,cell_exon_vs_cell_inex_goseq
GO:0043491,0.0475519499339743,0.983966382106025,6,113,protein kinase B signaling,BP,cell_exon_vs_cell_inex_goseq
GO:0016504,0.0478191350328002,0.991334969871645,3,34,peptidase activator activity,MF,cell_exon_vs_cell_inex_goseq
GO:1901673,0.0478583650167188,0.995202044679218,2,14,regulation of mitotic spindle assembly,BP,cell_exon_vs_cell_inex_goseq
GO:0031328,0.0478793870062967,0.968395666262461,34,1271,positive regulation of cellular biosynthetic process,BP,cell_exon_vs_cell_inex_goseq
GO:0004322,0.0479685165198142,1,1,1,ferroxidase activity,MF,cell_exon_vs_cell_inex_goseq
GO:0016724,0.0479685165198142,1,1,1,"oxidoreductase activity, acting on metal ions, oxygen as acceptor",MF,cell_exon_vs_cell_inex_goseq
GO:0016282,0.0480275487367298,0.995137815124688,2,15,eukaryotic 43S preinitiation complex,CC,cell_exon_vs_cell_inex_goseq
GO:0048857,0.0480317053870016,0.991188900319713,3,42,neural nucleus development,BP,cell_exon_vs_cell_inex_goseq
GO:0060148,0.0480368845902177,0.99495472559526,2,23,positive regulation of posttranscriptional gene silencing,BP,cell_exon_vs_cell_inex_goseq
GO:1905673,0.048156176909476,1,1,1,positive regulation of lysosome organization,BP,cell_exon_vs_cell_inex_goseq
GO:0002931,0.0482316157868804,0.991157238264729,3,40,response to ischemia,BP,cell_exon_vs_cell_inex_goseq
GO:0001649,0.0482470433030029,0.983641973116474,6,124,osteoblast differentiation,BP,cell_exon_vs_cell_inex_goseq
GO:0032536,0.0483009636750975,0.999109976412262,1,4,regulation of cell projection size,BP,cell_exon_vs_cell_inex_goseq
GO:2000383,0.0483140571028276,1,1,1,regulation of ectoderm development,BP,cell_exon_vs_cell_inex_goseq
GO:2000384,0.0483140571028276,1,1,1,negative regulation of ectoderm development,BP,cell_exon_vs_cell_inex_goseq
GO:0010466,0.0483445482024947,0.98363424008435,6,113,negative regulation of peptidase activity,BP,cell_exon_vs_cell_inex_goseq
GO:0005767,0.0484748714916833,0.995033946360605,2,16,secondary lysosome,CC,cell_exon_vs_cell_inex_goseq
GO:0002019,0.0484758236340011,1,1,1,regulation of renal output by angiotensin,BP,cell_exon_vs_cell_inex_goseq
GO:0003083,0.0484758236340011,1,1,1,negative regulation of renal output by angiotensin,BP,cell_exon_vs_cell_inex_goseq
GO:0003106,0.0484758236340011,1,1,1,negative regulation of glomerular filtration by angiotensin,BP,cell_exon_vs_cell_inex_goseq
GO:0014895,0.0484758236340011,1,1,1,smooth muscle hypertrophy,BP,cell_exon_vs_cell_inex_goseq
GO:0030101,0.0486781755753437,0.991013602025108,3,43,natural killer cell activation,BP,cell_exon_vs_cell_inex_goseq
GO:0032371,0.0488305806468987,0.991014193425782,3,39,regulation of sterol transport,BP,cell_exon_vs_cell_inex_goseq
GO:0032374,0.0488305806468987,0.991014193425782,3,39,regulation of cholesterol transport,BP,cell_exon_vs_cell_inex_goseq
GO:0009135,0.0488446763010947,0.987853292045443,4,73,purine nucleoside diphosphate metabolic process,BP,cell_exon_vs_cell_inex_goseq
GO:0009179,0.0488446763010947,0.987853292045443,4,73,purine ribonucleoside diphosphate metabolic process,BP,cell_exon_vs_cell_inex_goseq
GO:0097061,0.0489388614690299,0.990819688628284,3,64,dendritic spine organization,BP,cell_exon_vs_cell_inex_goseq
GO:0030163,0.048958801042955,0.970753726919704,22,748,protein catabolic process,BP,cell_exon_vs_cell_inex_goseq
GO:0050714,0.0491165880050613,0.98773723074413,4,79,positive regulation of protein secretion,BP,cell_exon_vs_cell_inex_goseq
GO:0008347,0.0493088151238643,0.990940961231161,3,35,glial cell migration,BP,cell_exon_vs_cell_inex_goseq
GO:0021879,0.0494105700180977,0.994827462035421,2,18,forebrain neuron differentiation,BP,cell_exon_vs_cell_inex_goseq
GO:2001257,0.0494260837351173,0.987623184174011,4,82,regulation of cation channel activity,BP,cell_exon_vs_cell_inex_goseq
GO:0000245,0.0495403206941458,0.990749352809901,3,48,spliceosomal complex assembly,BP,cell_exon_vs_cell_inex_goseq
GO:0002481,0.0497859377421475,1,1,1,"antigen processing and presentation of exogenous protein antigen via MHC class Ib, TAP-dependent",BP,cell_exon_vs_cell_inex_goseq
GO:0071283,0.0497859377421475,1,1,1,cellular response to iron(III) ion,BP,cell_exon_vs_cell_inex_goseq
GO:1901223,0.0499313147493655,0.994769852205328,2,17,negative regulation of NIK/NF-kappaB signaling,BP,cell_exon_vs_cell_inex_goseq
GO:0002016,0.0499586253216819,0.999362044669921,1,2,regulation of blood volume by renin-angiotensin,BP,cell_exon_vs_cell_inex_goseq
GO:0002287,0.050091225603836,0.990637880506222,3,44,alpha-beta T cell activation involved in immune response,BP,cell_exon_vs_cell_inex_goseq
GO:0002293,0.050091225603836,0.990637880506222,3,44,alpha-beta T cell differentiation involved in immune response,BP,cell_exon_vs_cell_inex_goseq
GO:0002294,0.050091225603836,0.990637880506222,3,44,"CD4-positive, alpha-beta T cell differentiation involved in immune response",BP,cell_exon_vs_cell_inex_goseq
GO:1903322,0.0503308710833817,0.984796163501491,5,108,positive regulation of protein modification by small protein conjugation or removal,BP,cell_exon_vs_cell_inex_goseq
GO:0015248,0.0503986206834613,0.994550084388499,2,24,sterol transporter activity,MF,cell_exon_vs_cell_inex_goseq
GO:0051365,0.0504068191980421,1,1,1,cellular response to potassium ion starvation,BP,cell_exon_vs_cell_inex_goseq
GO:0048511,0.0504283190098269,0.980927426553332,7,184,rhythmic process,BP,cell_exon_vs_cell_inex_goseq
GO:0090382,0.0505104616624509,0.994623086969215,2,19,phagosome maturation,BP,cell_exon_vs_cell_inex_goseq
GO:2001022,0.0505762447852264,0.987241559366337,4,82,positive regulation of response to DNA damage stimulus,BP,cell_exon_vs_cell_inex_goseq
GO:0031301,0.0506696845785131,0.975144611850504,12,306,integral component of organelle membrane,CC,cell_exon_vs_cell_inex_goseq
GO:0048250,0.0507175251597499,0.999342255424108,1,2,iron import into the mitochondrion,BP,cell_exon_vs_cell_inex_goseq
GO:0046641,0.0507716387843548,0.994664124934805,2,16,positive regulation of alpha-beta T cell proliferation,BP,cell_exon_vs_cell_inex_goseq
GO:0033291,0.0508636788877352,1,1,1,eukaryotic 80S initiation complex,CC,cell_exon_vs_cell_inex_goseq
GO:0034463,0.0508636788877352,1,1,1,90S preribosome assembly,BP,cell_exon_vs_cell_inex_goseq
GO:0070992,0.0508636788877352,1,1,1,translation initiation complex,CC,cell_exon_vs_cell_inex_goseq
GO:0061945,0.0509307922103061,0.999009291832534,1,4,regulation of protein K48-linked ubiquitination,BP,cell_exon_vs_cell_inex_goseq
GO:0046718,0.0509745559407489,0.984589838153816,5,96,viral entry into host cell,BP,cell_exon_vs_cell_inex_goseq
GO:0071560,0.0510893108507373,0.982391849790502,6,142,cellular response to transforming growth factor beta stimulus,BP,cell_exon_vs_cell_inex_goseq
GO:0042056,0.0511834118557415,0.994723190692304,2,13,chemoattractant activity,MF,cell_exon_vs_cell_inex_goseq
GO:0046939,0.051228581155382,0.987091803792532,4,68,nucleotide phosphorylation,BP,cell_exon_vs_cell_inex_goseq
GO:0061684,0.0513172120104438,0.994653145379644,2,14,chaperone-mediated autophagy,BP,cell_exon_vs_cell_inex_goseq
GO:0072507,0.0514442929723695,0.977682317674972,9,243,divalent inorganic cation homeostasis,BP,cell_exon_vs_cell_inex_goseq
GO:0035594,0.051481490181437,0.999098684513555,1,3,ganglioside binding,MF,cell_exon_vs_cell_inex_goseq
GO:0032357,0.051625057949089,0.998838534814891,1,7,oxidized purine DNA binding,MF,cell_exon_vs_cell_inex_goseq
GO:0070993,0.0518221786880379,0.994491725088464,2,16,translation preinitiation complex,CC,cell_exon_vs_cell_inex_goseq
GO:0045930,0.0518602892406781,0.980312066698076,7,159,negative regulation of mitotic cell cycle,BP,cell_exon_vs_cell_inex_goseq
GO:0002538,0.0519548147971086,0.999081833470817,1,3,arachidonic acid metabolite production involved in inflammatory response,BP,cell_exon_vs_cell_inex_goseq
GO:0002540,0.0519548147971086,0.999081833470817,1,3,leukotriene production involved in inflammatory response,BP,cell_exon_vs_cell_inex_goseq
GO:0031256,0.0519607675503979,0.986674867927429,4,119,leading edge membrane,CC,cell_exon_vs_cell_inex_goseq
GO:0014910,0.0519879693735997,0.990158109714841,3,42,regulation of smooth muscle cell migration,BP,cell_exon_vs_cell_inex_goseq
GO:0051480,0.0520111316387537,0.981977384564366,6,151,regulation of cytosolic calcium ion concentration,BP,cell_exon_vs_cell_inex_goseq
GO:0016595,0.0521280246970848,0.998961627767367,1,4,glutamate binding,MF,cell_exon_vs_cell_inex_goseq
GO:0010716,0.0521306517344771,0.999075532700396,1,3,negative regulation of extracellular matrix disassembly,BP,cell_exon_vs_cell_inex_goseq
GO:0007568,0.0521862298823582,0.977333493881043,9,218,aging,BP,cell_exon_vs_cell_inex_goseq
GO:1900259,0.0522257143827616,1,1,1,regulation of RNA-directed 5'-3' RNA polymerase activity,BP,cell_exon_vs_cell_inex_goseq
GO:1900260,0.0522257143827616,1,1,1,negative regulation of RNA-directed 5'-3' RNA polymerase activity,BP,cell_exon_vs_cell_inex_goseq
GO:0070257,0.0522511422272929,0.999071202419015,1,3,positive regulation of mucus secretion,BP,cell_exon_vs_cell_inex_goseq
GO:0015959,0.052282399374812,0.998841062634514,1,6,diadenosine polyphosphate metabolic process,BP,cell_exon_vs_cell_inex_goseq
GO:0009185,0.0524474793298109,0.98664110892762,4,76,ribonucleoside diphosphate metabolic process,BP,cell_exon_vs_cell_inex_goseq
GO:0071559,0.0524703091408149,0.981790019849192,6,146,response to transforming growth factor beta,BP,cell_exon_vs_cell_inex_goseq
GO:0017022,0.0526697611008645,0.989947779793864,3,45,myosin binding,MF,cell_exon_vs_cell_inex_goseq
GO:1903580,0.053242595167132,0.994099811734315,2,22,positive regulation of ATP metabolic process,BP,cell_exon_vs_cell_inex_goseq
GO:0060966,0.0534381435762679,0.989794251063269,3,40,regulation of gene silencing by RNA,BP,cell_exon_vs_cell_inex_goseq
GO:0000902,0.053773337956924,0.971675736237404,14,615,cell morphogenesis,BP,cell_exon_vs_cell_inex_goseq
GO:0110021,0.0539537634173602,0.99900890350601,1,3,cardiac muscle myoblast proliferation,BP,cell_exon_vs_cell_inex_goseq
GO:0110022,0.0539537634173602,0.99900890350601,1,3,regulation of cardiac muscle myoblast proliferation,BP,cell_exon_vs_cell_inex_goseq
GO:0110024,0.0539537634173602,0.99900890350601,1,3,positive regulation of cardiac muscle myoblast proliferation,BP,cell_exon_vs_cell_inex_goseq
GO:0030425,0.054402496622341,0.974891983378963,10,368,dendrite,CC,cell_exon_vs_cell_inex_goseq
GO:0007163,0.0544107105276322,0.98311379309419,5,147,establishment or maintenance of cell polarity,BP,cell_exon_vs_cell_inex_goseq
GO:0008428,0.0544596028854432,0.998989995359503,1,3,ribonuclease inhibitor activity,MF,cell_exon_vs_cell_inex_goseq
GO:1902626,0.054498920935285,1,1,1,assembly of large subunit precursor of preribosome,BP,cell_exon_vs_cell_inex_goseq
GO:0000463,0.0546509425729077,0.994057578193185,2,15,"maturation of LSU-rRNA from tricistronic rRNA transcript (SSU-rRNA, 5.8S rRNA, LSU-rRNA)",BP,cell_exon_vs_cell_inex_goseq
GO:0090235,0.0546766277390973,0.998781244832621,1,5,regulation of metaphase plate congression,BP,cell_exon_vs_cell_inex_goseq
GO:0048598,0.0548704409399245,0.975864985695309,9,284,embryonic morphogenesis,BP,cell_exon_vs_cell_inex_goseq
GO:0034330,0.0549155960487244,0.974601263329478,10,390,cell junction organization,BP,cell_exon_vs_cell_inex_goseq
GO:0045580,0.0549395482646857,0.983063523525639,5,92,regulation of T cell differentiation,BP,cell_exon_vs_cell_inex_goseq
GO:0032079,0.0549653338594492,0.998844090493114,1,4,positive regulation of endodeoxyribonuclease activity,BP,cell_exon_vs_cell_inex_goseq
GO:0090280,0.0551898501116524,0.994130825269372,2,12,positive regulation of calcium ion import,BP,cell_exon_vs_cell_inex_goseq
GO:0070934,0.0551998961031542,0.99883408485949,1,4,CRD-mediated mRNA stabilization,BP,cell_exon_vs_cell_inex_goseq
GO:1904064,0.0553205741823861,0.985675480458832,4,74,positive regulation of cation transmembrane transport,BP,cell_exon_vs_cell_inex_goseq
GO:0031905,0.0554060532161713,0.999213099852633,1,2,early endosome lumen,CC,cell_exon_vs_cell_inex_goseq
GO:0097447,0.0556219530868611,0.974229131935096,10,369,dendritic tree,CC,cell_exon_vs_cell_inex_goseq
GO:0051222,0.0556504093585823,0.976891939822769,8,210,positive regulation of protein transport,BP,cell_exon_vs_cell_inex_goseq
GO:0045591,0.0556657323537059,0.994051843292418,2,12,positive regulation of regulatory T cell differentiation,BP,cell_exon_vs_cell_inex_goseq
GO:1900744,0.055693925506478,0.989292219861687,3,33,regulation of p38MAPK cascade,BP,cell_exon_vs_cell_inex_goseq
GO:0032801,0.0557331544390069,0.993629041624769,2,24,receptor catabolic process,BP,cell_exon_vs_cell_inex_goseq
GO:0010710,0.0557966669998726,0.998939133636392,1,3,regulation of collagen catabolic process,BP,cell_exon_vs_cell_inex_goseq
GO:0001773,0.0558789182325956,0.9937099159744,2,19,myeloid dendritic cell activation,BP,cell_exon_vs_cell_inex_goseq
GO:0022604,0.0560121073220956,0.978264614486157,7,226,regulation of cell morphogenesis,BP,cell_exon_vs_cell_inex_goseq
GO:1902231,0.0560125273381362,0.998720248487032,1,5,positive regulation of intrinsic apoptotic signaling pathway in response to DNA damage,BP,cell_exon_vs_cell_inex_goseq
GO:0030216,0.0560257196914569,0.988987679063167,3,51,keratinocyte differentiation,BP,cell_exon_vs_cell_inex_goseq
GO:0032412,0.0561279273559733,0.982479004143163,5,125,regulation of ion transmembrane transporter activity,BP,cell_exon_vs_cell_inex_goseq
GO:0061082,0.0561401666460676,0.993574279053984,2,23,myeloid leukocyte cytokine production,BP,cell_exon_vs_cell_inex_goseq
GO:1904751,0.056186123120021,0.998924077678055,1,3,positive regulation of protein localization to nucleolus,BP,cell_exon_vs_cell_inex_goseq
GO:0014911,0.0562656111716723,0.993551952331386,2,23,positive regulation of smooth muscle cell migration,BP,cell_exon_vs_cell_inex_goseq
GO:1904716,0.0562909272023068,1,1,1,positive regulation of chaperone-mediated autophagy,BP,cell_exon_vs_cell_inex_goseq
GO:0033592,0.0563607909053463,0.998704096467314,1,5,RNA strand annealing activity,MF,cell_exon_vs_cell_inex_goseq
GO:1901193,0.0565506080824907,1,1,1,regulation of formation of translation preinitiation complex,BP,cell_exon_vs_cell_inex_goseq
GO:1901194,0.0565506080824907,1,1,1,negative regulation of formation of translation preinitiation complex,BP,cell_exon_vs_cell_inex_goseq
GO:1904689,0.0565506080824907,1,1,1,negative regulation of cytoplasmic translational initiation,BP,cell_exon_vs_cell_inex_goseq
GO:0090169,0.0565878160462977,0.99358541019602,2,19,regulation of spindle assembly,BP,cell_exon_vs_cell_inex_goseq
GO:0019767,0.0568751712664651,1,1,1,IgE receptor activity,MF,cell_exon_vs_cell_inex_goseq
GO:0042771,0.0570506381707546,0.988888584571899,3,35,intrinsic apoptotic signaling pathway in response to DNA damage by p53 class mediator,BP,cell_exon_vs_cell_inex_goseq
GO:0001228,0.0572173960694245,0.974688807512756,9,237,"DNA-binding transcription activator activity, RNA polymerase II-specific",MF,cell_exon_vs_cell_inex_goseq
GO:0043204,0.0572764475330739,0.984984887798164,4,77,perikaryon,CC,cell_exon_vs_cell_inex_goseq
GO:0061714,0.0573379092200711,1,1,1,folic acid receptor activity,MF,cell_exon_vs_cell_inex_goseq
GO:0071231,0.0573379092200711,1,1,1,cellular response to folic acid,BP,cell_exon_vs_cell_inex_goseq
GO:0070423,0.0574037141103959,0.993440995034392,2,19,nucleotide-binding oligomerization domain containing signaling pathway,BP,cell_exon_vs_cell_inex_goseq
GO:0032423,0.0577902881040514,0.999142848648465,1,2,regulation of mismatch repair,BP,cell_exon_vs_cell_inex_goseq
GO:0032425,0.0577902881040514,0.999142848648465,1,2,positive regulation of mismatch repair,BP,cell_exon_vs_cell_inex_goseq
GO:0006986,0.0578553508743632,0.97954999867202,6,111,response to unfolded protein,BP,cell_exon_vs_cell_inex_goseq
GO:2000514,0.0578672550266592,0.988542020473919,3,44,"regulation of CD4-positive, alpha-beta T cell activation",BP,cell_exon_vs_cell_inex_goseq
GO:1900102,0.0580037115398157,0.993531046722591,2,14,negative regulation of endoplasmic reticulum unfolded protein response,BP,cell_exon_vs_cell_inex_goseq
GO:0044387,0.0580889584090572,0.998565965697786,1,6,negative regulation of protein kinase activity by regulation of protein phosphorylation,BP,cell_exon_vs_cell_inex_goseq
GO:2001256,0.0581636175546497,0.998521857390737,1,7,regulation of store-operated calcium entry,BP,cell_exon_vs_cell_inex_goseq
GO:1902035,0.0582091919132694,0.998844114813485,1,3,positive regulation of hematopoietic stem cell proliferation,BP,cell_exon_vs_cell_inex_goseq
GO:0006633,0.0582189205897632,0.981738511415288,5,97,fatty acid biosynthetic process,BP,cell_exon_vs_cell_inex_goseq
GO:0060710,0.0582384972097753,0.998842934876523,1,3,chorio-allantoic fusion,BP,cell_exon_vs_cell_inex_goseq
GO:0007049,0.0583890964370414,0.961498186058763,31,1192,cell cycle,BP,cell_exon_vs_cell_inex_goseq
GO:0043122,0.0583947650838713,0.975546842391682,8,192,regulation of I-kappaB kinase/NF-kappaB signaling,BP,cell_exon_vs_cell_inex_goseq
GO:0016363,0.0585292879941282,0.98448112877835,4,92,nuclear matrix,CC,cell_exon_vs_cell_inex_goseq
GO:0001216,0.0588014271845719,0.973850018250056,9,240,DNA-binding transcription activator activity,MF,cell_exon_vs_cell_inex_goseq
GO:0008240,0.0588598560364194,0.999110327987363,1,2,tripeptidyl-peptidase activity,MF,cell_exon_vs_cell_inex_goseq
GO:0044089,0.0588932040138275,0.972449557478489,10,353,positive regulation of cellular component biogenesis,BP,cell_exon_vs_cell_inex_goseq
GO:1902893,0.0592136539284433,0.988202211283872,3,41,regulation of pri-miRNA transcription by RNA polymerase II,BP,cell_exon_vs_cell_inex_goseq
GO:1903203,0.059244477502017,0.993013402867294,2,23,regulation of oxidative stress-induced neuron death,BP,cell_exon_vs_cell_inex_goseq
GO:0032796,0.0592577408947088,0.999098070804553,1,2,uropod organization,BP,cell_exon_vs_cell_inex_goseq
GO:0009593,0.0593657102375932,0.993012156190596,2,22,detection of chemical stimulus,BP,cell_exon_vs_cell_inex_goseq
GO:0046790,0.0594978016939313,0.998494699630676,1,6,virion binding,MF,cell_exon_vs_cell_inex_goseq
GO:0071159,0.0596011251418065,0.999087423034255,1,2,NF-kappaB complex,CC,cell_exon_vs_cell_inex_goseq
GO:1990145,0.0596187477251938,0.999086874849072,1,2,maintenance of translational fidelity,BP,cell_exon_vs_cell_inex_goseq
GO:0009615,0.0596792072909424,0.97100376243496,11,261,response to virus,BP,cell_exon_vs_cell_inex_goseq
GO:0106027,0.0597843897109714,0.987819623795042,3,71,neuron projection organization,BP,cell_exon_vs_cell_inex_goseq
GO:0010888,0.0598181355767474,0.993038488286705,2,18,negative regulation of lipid storage,BP,cell_exon_vs_cell_inex_goseq
GO:0001788,0.0598509884952926,1,1,1,antibody-dependent cellular cytotoxicity,BP,cell_exon_vs_cell_inex_goseq
GO:0001813,0.0598509884952926,1,1,1,regulation of antibody-dependent cellular cytotoxicity,BP,cell_exon_vs_cell_inex_goseq
GO:0001815,0.0598509884952926,1,1,1,positive regulation of antibody-dependent cellular cytotoxicity,BP,cell_exon_vs_cell_inex_goseq
GO:0030178,0.0598512670012622,0.984044200622838,4,85,negative regulation of Wnt signaling pathway,BP,cell_exon_vs_cell_inex_goseq
GO:0031491,0.0599662022332859,0.984165174726893,4,60,nucleosome binding,MF,cell_exon_vs_cell_inex_goseq
GO:0032499,0.0600964573758084,1,1,1,detection of peptidoglycan,BP,cell_exon_vs_cell_inex_goseq
GO:0034150,0.0600964573758084,1,1,1,toll-like receptor 6 signaling pathway,BP,cell_exon_vs_cell_inex_goseq
GO:0034151,0.0600964573758084,1,1,1,regulation of toll-like receptor 6 signaling pathway,BP,cell_exon_vs_cell_inex_goseq
GO:0038118,0.0600964573758084,1,1,1,C-C chemokine receptor CCR7 signaling pathway,BP,cell_exon_vs_cell_inex_goseq
GO:0045960,0.0600964573758084,1,1,1,"positive regulation of complement activation, classical pathway",BP,cell_exon_vs_cell_inex_goseq
GO:0070392,0.0600964573758084,1,1,1,detection of lipoteichoic acid,BP,cell_exon_vs_cell_inex_goseq
GO:1903080,0.0600964573758084,1,1,1,regulation of C-C chemokine receptor CCR7 signaling pathway,BP,cell_exon_vs_cell_inex_goseq
GO:1903082,0.0600964573758084,1,1,1,positive regulation of C-C chemokine receptor CCR7 signaling pathway,BP,cell_exon_vs_cell_inex_goseq
GO:1905291,0.0600964573758084,1,1,1,positive regulation of CAMKK-AMPK signaling cascade,BP,cell_exon_vs_cell_inex_goseq
GO:1905805,0.0600964573758084,1,1,1,excitatory synapse pruning,BP,cell_exon_vs_cell_inex_goseq
GO:1905806,0.0600964573758084,1,1,1,regulation of synapse pruning,BP,cell_exon_vs_cell_inex_goseq
GO:1905808,0.0600964573758084,1,1,1,positive regulation of synapse pruning,BP,cell_exon_vs_cell_inex_goseq
GO:2000350,0.0600964573758084,1,1,1,positive regulation of CD40 signaling pathway,BP,cell_exon_vs_cell_inex_goseq
GO:0046637,0.0604267451290052,0.987783011870773,3,48,regulation of alpha-beta T cell differentiation,BP,cell_exon_vs_cell_inex_goseq
GO:0030856,0.0605110822708367,0.983931012562759,4,65,regulation of epithelial cell differentiation,BP,cell_exon_vs_cell_inex_goseq
GO:0045995,0.060606653666525,0.992618618627747,2,33,regulation of embryonic development,BP,cell_exon_vs_cell_inex_goseq
GO:0006576,0.0606302333725443,0.987715846443153,3,49,cellular biogenic amine metabolic process,BP,cell_exon_vs_cell_inex_goseq
GO:0035872,0.0608712367585626,0.992784757015463,2,20,"nucleotide-binding domain, leucine rich repeat containing receptor signaling pathway",BP,cell_exon_vs_cell_inex_goseq
GO:0032615,0.0609041571930955,0.987740407889843,3,40,interleukin-12 production,BP,cell_exon_vs_cell_inex_goseq
GO:0032655,0.0609041571930955,0.987740407889843,3,40,regulation of interleukin-12 production,BP,cell_exon_vs_cell_inex_goseq
GO:2001190,0.0609997984664479,0.998728977461337,1,3,positive regulation of T cell activation via T cell receptor contact with antigen bound to MHC molecule on antigen presenting cell,BP,cell_exon_vs_cell_inex_goseq
GO:0120254,0.0613012710959279,0.98366867707843,4,63,olefinic compound metabolic process,BP,cell_exon_vs_cell_inex_goseq
GO:0038084,0.0613229418763898,0.992701198689596,2,20,vascular endothelial growth factor signaling pathway,BP,cell_exon_vs_cell_inex_goseq
GO:2001259,0.0616451820384533,0.987560468783172,3,38,positive regulation of cation channel activity,BP,cell_exon_vs_cell_inex_goseq
GO:0016607,0.0617146874071826,0.969755385523218,11,341,nuclear speck,CC,cell_exon_vs_cell_inex_goseq
GO:0032703,0.0617453058136468,0.992765663940056,2,16,negative regulation of interleukin-2 production,BP,cell_exon_vs_cell_inex_goseq
GO:0032701,0.0617697277171239,0.999018688052516,1,2,negative regulation of interleukin-18 production,BP,cell_exon_vs_cell_inex_goseq
GO:0016154,0.0618257198281511,1,1,1,pyrimidine-nucleoside phosphorylase activity,MF,cell_exon_vs_cell_inex_goseq
GO:0010543,0.0618402110710728,0.992553504379417,2,22,regulation of platelet activation,BP,cell_exon_vs_cell_inex_goseq
GO:0010501,0.0618480987611991,0.99832619654629,1,7,RNA secondary structure unwinding,BP,cell_exon_vs_cell_inex_goseq
GO:1903578,0.0620003498029726,0.983439057633491,4,61,regulation of ATP metabolic process,BP,cell_exon_vs_cell_inex_goseq
GO:0030247,0.0620737859783501,0.992874508503255,2,13,polysaccharide binding,MF,cell_exon_vs_cell_inex_goseq
GO:0010557,0.0621415554577259,0.958526958492099,32,1217,positive regulation of macromolecule biosynthetic process,BP,cell_exon_vs_cell_inex_goseq
[truncated: 80,003 more rows]

## Sheet: README
Table S3. GOseq results for human microglia (Intron&Exon, fold change > 1.5). A description of the comparison (between assays and/or preprocessing) and statistical test are stored in column ‘mode’.
